# Supplementary material for: Unimolecular reaction energies for polycyclic aromatic hydrocarbon ions
Source: Royal Society of Chemistry journal article supplement (doi:10.1039/c7cp07369k), 2018-01-01
Supplement: c7cp07369k2.xlsx [file c7cp07369k2.xlsx]

## Sheet: rovib frequencies
precursor molecule	Fluorene							Cyclopenta[d,e,f]phenanthrene						Acenaphthylene						Fluoranthene						Perylene						Pyrene					Corannulene			Coronene			dibenzo[a,e]pyrene						dibenzo[a,l]pyrene
Reaction no.				1	2	3	4				5	6	7				8	9	10				11	12	13				14	15	16				17	18			19			20				21	22	23
molecule	M	M+·	M-H+	TS-M-H+	TS-(M-H)-C2H2+	TS-(M-H)-C4H2+	TS-(M-H)-H+·	M	M+·	M-H+	TS-M-H+	TS-(M-H)-C2H2+	TS-(M-H)-H+·	M	M+·	M-H+	TS-M-H+	TS-M-C2H2+·	TS-(M-H)-H+·	M	M+·	M-H+	TS-M-H+	TS-(M-H)-H+·	TS-M-C2H2+·	M	M+·	M-H+	TS-M-H+	TS-M-H2+·	TS-(M-H)-H+·	M	M+·	M-H+	TS-M-H+	TS-(M-H)-H+·	M	M+·	TS-M-H+	M	M+·	TS-M-H+	M	M+·	M-H+	TS-M-H+	TS-M-H2+·	TS-(M-H)-H+·	M
rotational constants (GHz)	2.18386	2.11481	2.3108	--	--	--	--	1.22734	1.24203	1.26159	--	--	--	1.5131	1.54632	1.45332	--	--	--	1.03657	1.03041	1.11046	--	--	--	0.62248	0.61895	0.62858	--	--	--	1.01235	1.02145	1.00812	--	--	0.50736	0.51374	--	0.33292	0.33534	--	0.404016	0.38811	0.38811	--	--	--	0.404016
	0.58533	0.5977	0.5824	--	--	--	--	0.61086	0.60467	0.61631	--	--	--	1.22186	1.19673	1.32534	--	--	--	0.49214	0.49337	0.47742	--	--	--	0.32943	0.33259	0.33321	--	--	--	0.55624	0.55302	0.57799	--	--	0.50732	0.49826	--	0.33289	0.33071	--	0.220794	0.21592	0.21592	--	--	--	0.220794
	0.46293	0.46734	0.46516	--	--	--	--	0.40889	0.4077	0.41404	--	--	--	0.67599	0.67462	0.69319	--	--	--	0.33371	0.33363	0.33388	--	--	--	0.21542	0.21634	0.21777	--	--	--	0.35899	0.35878	0.36793	--	--	0.26288	0.2614	--	0.16645	0.1665	--	0.14277	0.13874	0.13874	--	--	--	0.14277
vibrational frequencies (cm-1)	97.5899	83.6024	102.955	137.944	123.546	120.457	74.1273	93.8244	96.8739	80.8715	12.5936	93.0022	32.3486	157.656	170.578	139.242	83	52	182	101.06	95.6211	91.2341	28.6863	71.1626	246.332	26.1511	43.0597	55.2748	17	16	69	97.7899	99.7718	103.996	113	146	140.066	27.8526	5	88.6831	84.8894	63	33.1879	38.5882	38.5882	12	10	8	51.359
	136.193	125.815	118.957	207.595	142.749	139.18	85.6493	184.216	175.643	183.814	22.8336	211.387	73.5258	211.226	195.505	199.471	95	59	260	121.218	118.787	111.514	35.6362	86.9809	301.088	95.9486	173.482	92.2568	70	66	114	151.128	145.037	140.706	164	198	140.431	132.551	25	88.8425	88.8341	66	53.5296	49.8633	49.8633	15	13	10	75.1418
	217.015	220.097	218.13	363.161	261.756	255.212	157.054	199.925	186.658	193.97	24.2655	223.065	77.5878	226.461	199.818	211.737	97	61	277	164.488	136.035	164.986	40.8106	128.689	445.461	129.149	252.879	158.4	102	97	196	211.341	199.225	201.012	225	282	146.578	142.338	26	127.842	97.39	72	75.5859	74.2065	74.2065	24	19	15	96.0471
	240.333	227.899	264.067	376.034	316.881	308.959	190.128	256.279	258.585	274.775	33.616	315.991	109.91	373.987	359.372	308.506	176	110	403	207.669	159.88	195.795	47.9641	152.72	528.647	181.1	368.681	172.692	149	141	215	246.881	244.311	236.288	275	333	279.409	188.841	35	165.622	123.041	92	100.954	97.849	97.849	31	25	20	119.65
	273.487	246.193	300.796	406.218	360.955	351.931	216.573	284.475	282.159	311.806	36.6806	358.577	124.722	422.447	419.648	320.976	204	128	419	252.911	242.343	251.334	72.7028	196.04	678.601	207.407	450.628	207.31	183	173	258	261.723	253.954	273.574	286	384	279.652	265.892	49	178.147	160.017	119	169.979	164.63	164.63	52	42	34	145.559
	419.391	393.198	386.807	393.198	386.807	386.807	386.807	341.253	335.183	340.938	335.183	340.938	340.938	458.986	437.484	434.462	437.484	437.484	434.462	294.205	274.569	269.73	274.569	269.73	269.73	238.478	510.384	232.319	510.384	510.384	232.319	358.985	354.284	319.584	354.284	319.584	309.257	272.811	272.811	233.172	221.196	221.196	177.076	174.772	174.772	174.772	174.772	174.772	182.342
	421.046	422.209	417.435	422.209	417.435	417.435	417.435	431.299	400.328	422.662	400.328	422.662	422.662	470.107	451.919	440.437	451.919	451.919	440.437	356.183	328.802	339.492	328.802	339.492	339.492	255.748	539.249	261.019	539.249	539.249	261.019	402.626	398.163	380.202	398.163	380.202	309.805	293.577	293.577	300.267	283.442	283.442	180.76	176.059	176.059	176.059	176.059	176.059	222.932
	436.969	437.519	423.809	437.519	423.809	423.809	423.809	442.248	439.799	450.653	439.799	450.653	450.653	517.917	489.87	514.883	489.87	489.87	514.883	433.421	368.871	341.44	368.871	341.44	341.44	300.793	619.755	279.408	619.755	619.755	279.408	411.707	413.692	390.777	413.692	390.777	409.287	305.711	305.711	300.372	293.301	293.301	247.048	241.296	241.296	241.296	241.296	241.296	254.578
	478.787	451.245	496.038	451.245	496.038	496.038	496.038	475.597	453.399	472.352	453.399	472.352	472.352	560.643	510.568	525.247	510.568	510.568	525.247	436.149	400.912	412.735	400.912	412.735	412.735	356.437	653.061	348.955	653.061	653.061	348.955	462.19	458.558	406.76	458.558	406.76	409.512	387.696	387.696	304.573	298.061	298.061	259.641	256.57	256.57	256.57	256.57	256.57	259.435
	498.452	495.162	513.302	495.162	513.302	513.302	513.302	491.892	459.541	477.861	459.541	477.861	477.861	579.963	541.641	536.998	541.641	541.641	536.998	464.091	417.85	444.933	417.85	444.933	444.933	365.349	773.671	371.176	773.671	773.671	371.176	498.863	468.284	465.587	468.284	465.587	438.154	404.408	404.408	304.827	299.588	299.588	283.985	273.994	273.994	273.994	273.994	273.994	292.738
	553.341	502.512	525.729	502.512	525.729	525.729	525.729	505.43	478.543	525.997	478.543	525.997	525.997	615.711	548.056	551.717	548.056	548.056	551.717	477.3	446.056	445.433	446.056	445.433	445.433	429.894	804.143	411.656	804.143	804.143	411.656	505.892	470.54	479.332	470.54	479.332	438.211	411.456	411.456	369.58	370.27	370.27	307.598	299.786	299.786	299.786	299.786	299.786	301.335
	574.109	526.035	535.33	526.035	535.33	535.33	535.33	529.526	523.187	528.474	523.187	528.474	528.474	667.926	618.706	590.546	618.706	618.706	590.546	493.072	489.777	481.732	489.777	481.732	481.732	435.385	821.998	431.108	821.998	821.998	431.108	506.784	501.308	512.237	501.308	512.237	452.125	431.292	431.292	369.665	380.263	380.263	321.214	319.546	319.546	319.546	319.546	319.546	332.96
	636.255	617.8	619.412	617.8	619.412	619.412	619.412	554.497	538.557	546.446	538.557	546.446	546.446	670.304	676.705	625.13	676.705	676.705	625.13	569.872	523.936	499.875	523.936	499.875	499.875	461.812	935.863	459.838	935.863	935.863	459.838	508.135	503.75	513.776	503.75	513.776	452.467	448.69	448.69	384.283	384.497	384.497	329.386	326.611	326.611	326.611	326.611	326.611	357.435
	644.617	625.769	657.712	625.769	657.712	657.712	657.712	571.556	539.638	560.017	539.638	560.017	560.017	695.506	701.309	647.127	701.309	701.309	647.127	571.009	559.301	523.855	559.301	523.855	523.855	468.615	958.125	464.796	958.125	958.125	464.796	536.328	538.319	523.885	538.319	523.885	538.704	495.386	495.386	384.778	437.171	437.171	400.568	398.624	398.624	398.624	398.624	398.624	387.519
	710.067	662.549	707.028	662.549	707.028	707.028	707.028	598.924	568.773	601.616	568.773	601.616	601.616	735.739	738.595	687.5	738.595	738.595	687.5	571.557	564.607	550.675	564.607	550.675	550.675	482.61	1008.77	466.483	1008.77	1008.77	466.483	553.711	538.512	537.305	538.512	537.305	546.773	528.25	528.25	457.596	443.643	443.643	410.429	398.95	398.95	398.95	398.95	398.95	400.869
	738.259	721.668	746.376	721.668	746.376	746.376	746.376	623.82	595.385	637.327	595.385	637.327	637.327	765.313	786.771	721.863	786.771	786.771	721.863	626.712	596.846	572.805	596.846	572.805	572.805	536.951	1055.6	506.127	1055.6	1055.6	506.127	581.592	546.105	547.152	546.105	547.152	547.28	536.206	536.206	458.338	468.258	468.258	422.01	416.498	416.498	416.498	416.498	416.498	421.452
	753.78	741.768	756.439	741.768	756.439	756.439	756.439	663.249	661.706	681.311	661.706	681.311	681.311	783.875	789.976	762.617	789.976	789.976	762.617	627.024	618.314	595.415	618.314	595.415	595.415	541.621	1141.39	529.43	1141.39	1141.39	529.43	594.837	600.908	598.032	600.908	598.032	558.913	546.228	546.228	480.364	476.724	476.724	436.414	434.818	434.818	434.818	434.818	434.818	436.163
	755.188	774.562	781.975	774.562	781.975	781.975	781.975	704.613	691.567	682.993	691.567	682.993	682.993	817.024	804.065	772.143	804.065	804.065	772.143	648.28	632.564	601.069	632.564	601.069	601.069	543.857	1181.97	534.911	1181.97	1181.97	534.911	687.578	675.99	607.236	675.99	607.236	604.896	551.629	551.629	485.045	480.556	480.556	454.44	437.87	437.87	437.87	437.87	437.87	460.686
	791.861	801.09	786.176	801.09	786.176	786.176	786.176	712.984	696.875	690.814	696.875	690.814	690.814	837.5	858.801	812.99	858.801	858.801	812.99	684.161	652.39	620.592	652.39	620.592	620.592	554.406	1237.94	535.26	1237.94	1237.94	535.26	703.499	687.371	679.121	687.371	679.121	611.212	577.99	577.99	496.612	489.195	489.195	490.7	478.173	478.173	478.173	478.173	478.173	483.258
	813.4	816.287	861.985	816.287	861.985	861.985	861.985	760.91	750.773	744.375	750.773	744.375	744.375	878.884	859.551	818.059	859.551	859.551	818.059	746.618	718.008	685.896	718.008	685.896	685.896	562.084	1263.65	554.974	1263.65	1263.65	554.974	718.499	694.238	682.794	694.238	682.794	611.676	599.159	599.159	496.823	495.961	495.961	497.28	486.65	486.65	486.65	486.65	486.65	499.517
	853.347	845.343	884.258	845.343	884.258	884.258	884.258	780.929	769.06	779.513	769.06	779.513	779.513	919.276	930.784	914.304	930.784	930.784	914.304	753.423	729.696	720.196	729.696	720.196	720.196	588.181	1380.18	583.453	1380.18	1380.18	583.453	748.852	710.548	735.675	710.548	735.675	647.326	609.25	609.25	529.013	499.051	499.051	521.186	491.75	491.75	491.75	491.75	491.75	518.491
	871.261	869.769	896.555	869.769	896.555	896.555	896.555	783.901	774.629	813.125	774.629	813.125	813.125	932.713	963.357	937.49	963.357	963.357	937.49	776.582	738.648	734.495	738.648	734.495	734.495	634.888	1414.34	614.043	1414.34	1414.34	614.043	755.369	741.78	738.171	741.78	738.171	647.607	631.365	631.365	542.065	515.672	515.672	532.416	525.456	525.456	525.456	525.456	525.456	525.936
	880.298	891.12	921.66	891.12	921.66	921.66	921.66	811.7	802.105	818.215	802.105	818.215	818.215	936.961	975.237	939.507	975.237	975.237	939.507	783.394	773.674	747.02	773.674	747.02	747.02	637.211	1483.85	626.013	1483.85	1483.85	626.013	763.17	779.095	748.716	779.095	748.716	648.703	639.635	639.635	542.899	539.229	539.229	542.695	527.853	527.853	527.853	527.853	527.853	539.875
	932.845	956.049	968.359	956.049	968.359	968.359	968.359	825.788	825.178	829.462	825.178	829.462	829.462	980.944	1015.57	963.013	1015.57	1015.57	963.013	788.728	793.668	760.46	793.668	760.46	760.46	652.913	1502.37	632.501	1502.37	1502.37	632.501	810.251	805.916	773.509	805.916	773.509	670.896	644.048	644.048	563.421	557.732	557.732	562.378	557.044	557.044	557.044	557.044	557.044	547.972
	955.644	990.337	990.803	990.337	990.803	990.803	990.803	832.764	859.351	849.297	859.351	849.297	849.297	989.264	1020.4	1008.82	1020.4	1020.4	1008.82	815.858	812.001	775.432	812.001	775.432	775.432	654.833	1596.74	661.271	1596.74	1596.74	661.271	813.577	815.448	800.756	815.448	800.756	671.124	650.614	650.614	568.663	560.893	560.893	563.28	559.304	559.304	559.304	559.304	559.304	577.974
	975.469	998.004	1005.13	998.004	1005.13	1005.13	1005.13	899.659	904.615	921.848	904.615	921.848	921.848	1026.57	1039.58	1014.83	1039.58	1039.58	1014.83	827.052	821.906	807.792	821.906	807.792	807.792	739.459	1615.3	700.921	1615.3	1615.3	700.921	814.229	830.968	808.831	830.968	808.831	758.32	747.143	747.143	643.963	636.723	636.723	575.913	570.464	570.464	570.464	570.464	570.464	596.84
	992.803	1002.22	1005.4	1002.22	1005.4	1005.4	1005.4	911.311	944.647	974.442	944.647	974.442	974.442	1033.43	1043.1	1052.67	1043.1	1043.1	1052.67	883.352	904.382	814.788	904.382	814.788	814.788	765.374	3205.08	739.184	3205.08	3205.08	739.184	833.571	841.33	827.638	841.33	827.638	758.378	750.888	750.888	668.026	656.969	656.969	587.676	584.447	584.447	584.447	584.447	584.447	607.894
	994.43	1018.45	1024.52	1018.45	1024.52	1024.52	1024.52	958.786	968.496	986.63	968.496	986.63	986.63	1055.11	1069.88	1087.31	1069.88	1069.88	1087.31	905.665	905.223	892.876	905.223	892.876	892.876	770.258	3207.77	770.084	3207.77	3207.77	770.084	856.517	872.947	857.311	872.947	857.311	766.602	764.557	764.557	668.843	661.124	661.124	627.094	613.565	613.565	613.565	613.565	613.565	620.257
	1023.35	1019.55	1026.77	1019.55	1026.77	1026.77	1026.77	975.855	987.849	994.735	987.849	994.735	994.735	1101.15	1088.62	1110.46	1088.62	1088.62	1110.46	918.598	939.65	931.052	939.65	931.052	931.052	783.037	3222.92	785.382	3222.92	3222.92	785.382	906.153	947.653	869.779	947.653	869.779	766.794	782.468	782.468	680.555	677.254	677.254	637.995	632.259	632.259	632.259	632.259	632.259	627.158
	1044.55	1022.38	1032.08	1022.38	1032.08	1032.08	1032.08	983.485	1004.27	1013.26	1004.27	1013.26	1013.26	1112.36	1112.16	1125.68	1112.16	1112.16	1125.68	927.397	940.798	936.712	940.798	936.712	936.712	784.075	3233.72	791.07	3233.72	3233.72	791.07	919.277	958.573	960.558	958.573	960.558	803.549	798.798	798.798	690.455	684.77	684.77	649.968	645.877	645.877	645.877	645.877	645.877	640.373
	1051.21	1027.45	1035.64	1027.45	1035.64	1035.64	1035.64	986.795	1005.89	1016.24	1005.89	1016.24	1016.24	1175.52	1135.6	1175.04	1135.6	1135.6	1175.04	954.62	958.563	940.786	958.563	940.786	940.786	802.056	90.3183	799.281	90.3183	90.3183	799.281	978.389	991.683	971.739	991.683	971.739	803.851	803.41	803.41	690.531	687.926	687.926	674.309	664.584	664.584	664.584	664.584	664.584	677.06
	1116.84	1125.97	1102.7	1125.97	1102.7	1102.7	1102.7	992.166	1009.6	1017.53	1009.6	1017.53	1017.53	1202.93	1210.87	1212.66	1210.87	1210.87	1212.66	981.722	976.658	978.756	976.658	978.756	978.756	808.36	202.939	807.557	202.939	202.939	807.557	979.637	993.329	973.028	993.329	973.028	831.547	850.192	850.192	691.415	690.049	690.049	681.608	679.104	679.104	679.104	679.104	679.104	721.742
	1130.23	1128	1111.6	1128	1111.6	1111.6	1111.6	1018.53	1009.75	1028.35	1009.75	1028.35	1028.35	1222.86	1226.58	1242.99	1226.58	1226.58	1242.99	988.898	986.535	1006.51	986.535	1006.51	1006.51	823.822	283.531	825.581	283.531	283.531	825.581	984.345	1001.97	998.241	1001.97	998.241	831.661	857.555	857.555	730.763	715.511	715.511	709.442	710.405	710.405	710.405	710.405	710.405	729.836
	1162.42	1171.63	1149.42	1171.63	1149.42	1149.42	1149.42	1035.06	1033.33	1040.57	1033.33	1040.57	1040.57	1245.08	1252.81	1264.85	1252.81	1252.81	1264.85	990.172	1008.94	1009.48	1008.94	1009.48	1009.48	825.137	415.848	830.545	415.848	415.848	830.545	986.407	1004.08	1004.68	1004.08	1004.68	855.655	857.953	857.953	730.974	731.434	731.434	731.473	726.998	726.998	726.998	726.998	726.998	734.523
	1176.03	1177.41	1192.38	1177.41	1192.38	1192.38	1192.38	1047.4	1056.07	1050.85	1056.07	1050.85	1050.85	1271.91	1284.87	1348.14	1284.87	1284.87	1348.14	991.522	1012.36	1019.71	1012.36	1019.71	1019.71	828.417	463.06	831.228	463.06	463.06	831.228	993.641	1012.2	1020.28	1012.2	1020.28	867.161	868.419	868.419	775.407	755.496	755.496	735.201	734.542	734.542	734.542	734.542	734.542	740.964
	1180.07	1181.94	1199.04	1181.94	1199.04	1199.04	1199.04	1074.39	1070.49	1089.12	1070.49	1089.12	1089.12	1330.51	1337.47	1377.23	1337.47	1337.47	1377.23	1037.56	1013.78	1039.93	1013.78	1039.93	1039.93	894.862	529.045	936.086	529.045	529.045	936.086	1014.11	1014.45	1095.19	1014.45	1095.19	867.479	890.475	890.475	783.878	773.563	773.563	740.832	741.046	741.046	741.046	741.046	741.046	741.159
	1191.97	1189.1	1203.48	1189.1	1203.48	1203.48	1203.48	1159.15	1088.71	1164.44	1088.71	1164.44	1164.44	1383.45	1338.62	1406.54	1338.62	1338.62	1406.54	1042.85	1032.38	1048.62	1032.38	1048.62	1048.62	903.98	554.488	942.642	554.488	554.488	942.642	1089.89	1095.21	1105.21	1095.21	1105.21	936.736	938.196	938.196	784.077	777.324	777.324	747.31	750.81	750.81	750.81	750.81	750.81	746.155
	1206.95	1198.76	1263.11	1198.76	1263.11	1263.11	1263.11	1162.4	1134.63	1169.81	1134.63	1169.81	1169.81	1417.34	1373.41	1414.45	1373.41	1373.41	1414.45	1060.61	1052.06	1074.59	1052.06	1074.59	1074.59	913.963	629.759	952.534	629.759	629.759	952.534	1112.93	1121.62	1139.4	1121.62	1139.4	959.36	972.545	972.545	808.874	791.739	791.739	760.141	751.912	751.912	751.912	751.912	751.912	764.326
	1220.51	1228.03	1303.94	1228.03	1303.94	1303.94	1303.94	1183.83	1150.59	1189.8	1150.59	1189.8	1189.8	1445.54	1390.4	1457.24	1390.4	1390.4	1457.24	1105.34	1073.45	1102.01	1073.45	1102.01	1102.01	923.537	709.02	961.908	709.02	709.02	961.908	1126.23	1144.49	1163.11	1144.49	1163.11	967.055	979.606	979.606	810.822	805.551	805.551	787.186	783.205	783.205	783.205	783.205	783.205	783.579
	1252.12	1265.14	1311.83	1265.14	1311.83	1321.63	1311.83	1187.11	1182.76	1219.1	1182.76	1219.1	1219.1	1456.05	1437.29	1497.7	1437.29	1437.29	1497.7	1122.84	1098.63	1129.61	1098.63	1129.61	1129.61	960.791	781.687	975.791	781.687	781.687	975.791	1165.25	1167.82	1163.88	1167.82	1163.88	967.29	985.325	985.325	823.921	813.431	813.431	806.759	816.979	816.979	816.979	816.979	816.979	804.528
	1319.89	1340.09	1321.63	1340.09	1321.63	1369.4	1321.63	1206.32	1192.1	1223.1	1192.1	1236.96	1223.1	1486.84	1439.41	1533.44	1439.41	1439.41	1533.44	1161.14	1113.88	1152.86	1113.88	1152.86	1152.86	975.826	809.203	1004.55	809.203	809.203	1004.55	1167.53	1170.59	1188.28	1170.59	1188.28	975.893	986.751	986.751	823.961	826.693	826.693	814.831	819.884	819.884	819.884	819.884	819.884	817.02
	1329.42	1359.15	1369.4	1359.15	1369.4	1427.31	1369.4	1231.93	1217.4	1236.96	1217.4	1270.77	1236.96	1513.01	1478.13	1582.64	1478.13	1478.13	1582.64	1182.37	1155.79	1193.17	1155.79	1193.17	1193.17	980.134	826.593	1007.7	826.593	826.593	1007.7	1197.9	1202.4	1216.97	1202.4	1216.97	976.428	997.014	997.014	856.55	832.617	832.617	818.371	834.63	834.63	834.63	834.63	834.63	833.011
	1344.69	1384.76	1427.31	1384.76	1427.31	1466.92	1427.31	1236.21	1248.54	1270.77	1248.54	1273.43	1270.77	1534.48	1523.94	1617.09	1523.94	1523.94	1617.09	1184.26	1195.53	1207.05	1195.53	1207.05	1207.05	985.44	949.925	1011.76	949.925	949.925	1011.76	1204.3	1213.38	1229.95	1213.38	1229.95	1049.94	997.132	997.132	856.594	871.955	871.955	831.924	842.901	842.901	842.901	842.901	842.901	833.978
	1374.3	1402.98	1466.92	1402.98	1466.92	1482.16	1466.92	1247.31	1264.96	1273.43	1264.96	1338.17	1273.43	1633.23	1583.39	1925.5	1583.39	1583.39	1925.5	1207.87	1209.96	1227.28	1209.96	1227.28	1227.28	989.303	1003.13	1016.47	1003.13	1003.13	1016.47	1230.4	1234.37	1235.2	1234.37	1235.2	1089.58	1036.46	1036.46	877.345	873.975	873.975	850.505	864.078	864.078	864.078	864.078	864.078	848.253
	1450.76	1439.47	1482.16	1439.47	1482.16	1505.32	1482.16	1289.13	1292.77	1338.17	1292.77	1347.92	1338.17	1648.72	1610.61	3185.03	1610.61	1610.61	3185.03	1234.12	1238.93	1254.56	1238.93	1254.56	1254.56	994.571	1012.72	1044.3	1012.72	1012.72	1044.3	1261.21	1247.93	1250.74	1247.93	1250.74	1089.73	1097.79	1097.79	937.187	893.816	893.816	863.084	871.596	871.596	871.596	871.596	871.596	861.433
	1476.64	1442.66	1505.32	1442.66	1505.32	1528.18	1505.32	1337.22	1310.68	1347.92	1310.68	1407.52	1347.92	1657.34	1642.45	3195.59	1642.45	3185.92	3195.59	1253.03	1248.08	1286.93	1248.08	1286.93	1286.93	1066.17	1094.46	1095.77	1094.46	1094.46	1095.77	1263.46	1264.15	1272.67	1264.15	1272.67	1167.65	1100.33	1100.33	959.425	936.691	936.691	864.546	878.841	878.841	878.841	878.841	878.841	872.516
	1482.78	1467.22	1528.18	1467.22	1528.18	1613.96	1528.18	1379.99	1347.94	1407.52	1347.94	1437.01	1407.52	3160.08	3185.92	3205.39	3185.92	3186.69	3205.39	1292.32	1288.34	1324.37	1288.34	1324.37	1324.37	1080.83	1155.79	1126.48	1155.79	1155.79	1126.48	1267.5	1266.15	1308.09	1266.15	1308.09	1167.79	1112.23	1112.23	968.031	976.649	976.649	886.185	897.699	928.726	897.699	897.699	928.726	895.868
	1507.5	1488.32	1613.96	1488.32	1615.98	1615.98	1613.96	1383.62	1400.62	1437.01	1400.62	1459.81	1437.01	3160.6	3186.69	3209.41	3186.69	3195.48	3209.41	1317.65	1300.32	1342.6	1300.32	1342.6	1342.6	1119.49	1219.28	1136.32	1219.28	1219.28	1136.32	1342.62	1364.62	1379.73	1364.62	1379.73	1168.9	1168.38	1168.38	968.38	984.433	984.433	903.273	921.479	935.23	921.479	921.479	935.23	915.284
	1508.5	1510.64	1615.98	1510.64	1636.52	1636.52	1615.98	1435.72	1417.41	1459.81	1417.41	1466.74	1459.81	3169.48	3195.48	3220.34	3195.69	3195.69	3233.04	1339.28	1340.04	1371.21	1340.04	1371.21	1371.21	1133.33	1251.54	1148.29	1251.54	1251.54	1148.29	1350.54	1370.47	1392.98	1370.47	1392.98	1169.12	1173.57	1173.57	979.476	991.214	991.214	908.074	928.726	947.854	928.726	928.726	947.854	918.645
	1616.02	1537.9	1636.52	1537.9	1643.55	1643.55	1636.52	1449.89	1437.61	1466.74	1437.61	1472.5	1466.74	3170.2	3195.69	3233.04	3206.44	3206.44	3252.54	1395.04	1370.18	1390.12	1370.18	1390.12	1390.12	1158.05	1329.09	1166.33	1329.09	1329.09	1166.33	1399.17	1373.45	1409.19	1373.45	1409.19	1194.28	1189.75	1189.75	980.602	998.641	998.641	921.925	935.23	963.594	935.23	935.23	963.594	931.039
	1620.55	1565.45	1643.55	1565.45	3187.19	3187.19	1643.55	1452.93	1448.98	1472.5	1448.98	1505.56	1472.5	3183.28	3206.44	3252.54	3206.62	3206.62		1401.4	1402.2	1420.55	1402.2	1420.55	1420.55	1175.74	1383.12	1183.66	1383.12	1383.12	1183.66	1425.51	1423.34	1421.62	1423.34	1421.62	1194.45	1196.4	1196.4	986.408	1003.94	1003.94	925.539	947.854	972.831	947.854	947.854	972.831	934.585
	1646.08	1609.68	3187.19	1609.68	3187.65	3187.65	3187.19	1475.07	1457.83	1505.56	1457.83	1538.86	1505.56	3184.16	3206.62		3219.16	3219.16		1441.3	1435.44	1452.78	1435.44	1452.78	1452.78	1175.76	1418.31	1214.6	1418.31	1418.31	1214.6	1433.35	1448.08	1449.22	1448.08	1449.22	1220.45	1212.38	1212.38	1009.92	1008.34	1008.34	935.618	963.594	975.239	963.594	963.594	975.239	944.105
	1646.88	1653.47	3187.65	1653.47	3192.04	3192.04	3187.65	1487.91	1473.77	1538.86	1473.77	1592.8	1538.86	3202.76	3219.16		3231.07	3231.07		1452.47	1449.39	1477.5	1449.39	1477.5	1477.5	1221.3	1487.9	1234.06	1487.9	1487.9	1234.06	1456.6	1451.38	1450.24	1451.38	1450.24	1220.74	1223.27	1223.27	1010.1	1011.5	1011.5	942.683	972.831	999.365	972.831	972.831	999.365	948.977
	3022.02	3038.84	3192.04	3067.7	3192.55	3192.55	3192.04	1521.31	1524.55	1592.8	1524.55	1621.51	1592.8	3222.53	3231.07					1470.25	1461.63	1491.09	1461.63	1491.09	1491.09	1222.13	1531.13	1240.41	1531.13	1531.13	1240.41	1458.28	1462.96	1490.8	1462.96	1490.8	1242.73	1246.64	1246.64	1052.11	1023.22	1023.22	949.091	975.239	1029.58	975.239	975.239	1029.58	971.891
	3046.54	3067.7	3192.55	3186.93	3199.39	3199.39	3192.55	1536.79	1525.07	1621.51	1525.07	1673.41	1621.51							1484.84	1476.25	1510.51	1476.25	1510.51	1510.51	1222.85	1600.97	1251.38	1600.97	1600.97	1251.38	1481.73	1465.68	1522.51	1465.68	1522.51	1267	1257.55	1257.55	1164.39	1060.54	1060.54	1004.28	999.365	1031.5	999.365	999.365	1031.5	982.457
	3157.46	3186.93	3199.39	3187.43	3200.26	3200.26	3199.39	1626.53	1561	1673.41	1561	1694.11	1673.41							1504.52	1486.38	1580.71	1486.38	1580.71	1580.71	1242.16	1620.24	1260.65	1620.24	1620.24	1260.65	1512.83	1515.59	1562.02	1515.59	1562.02	1339.89	1274.95	1274.95	1165.01	1160.78	1160.78	1023.01	1029.58	1052.57	1029.58	1029.58	1052.57	1021.3
	3158.17	3187.43	3200.26	3193.97	3201.88	3201.88	3200.26	1629.14	1596.2	1694.11	1596.2	3183.31	1694.11							1521.04	1520.09	1607.77	1520.09	1607.77	1620.17	1244.02	3205.31	1288.16	3205.31	3205.31	1288.16	1532.99	1519.67	1589.87	1519.67	1589.87	1340.31	1296.3	1296.3	1170.42	1167.42	1167.42	1034.76	1031.5	1069.18	1031.5	1031.5	1069.18	1037.46
	3163.58	3193.97	3201.88	3196.22	3211.33	3211.33	3211.33	1655.9	1602.19	3183.31	1602.19	3183.53	3183.31							1611.73	1542.93	1620.17	1542.93	1620.17	1630.81	1253.12	3220.04	1332.07	3220.04	3220.04	1332.07	1592.89	1559.8	1605.4	1559.8	1605.4	1386.87	1309.49	1309.49	1181.41	1174.19	1174.19	1056.24	1052.57	1089.05	1052.57	1052.57	1089.05	1057.7
	3165.42	3196.22	3211.33	3199.78	3211.78	3211.78	3211.78	1667.7	1650.45	3183.53	1650.45	3184.27	3183.53							1637.9	1573.53	1630.81	1573.53	1630.81	1902.37	1313.41	3223.3	1365.15	3223.3	3223.3	1365.15	1623.97	1580.22	1637.12	1580.22	1637.12	1386.9	1342.85	1342.85	1189.22	1181.28	1181.28	1066.65	1069.18	1115.34	1069.18	1069.18	1115.34	1074.35
	3174.72	3199.78	3211.78	3200.97				3032.67	3032.44	3184.27	3032.44	3191.9	3184.27							1640.67	1587.58	1902.37	1587.58	1902.37	3182.72	1333.54	3251.63	1381.5	3251.63	3251.63	1381.5	1632.82	1585.41	1797.6	1585.41	1797.6	1436.01	1370.74	1370.74	1189.41	1196.28	1196.28	1086.22	1089.05	1138.7	1089.05	1089.05	1138.7	1105
	3176.16	3200.97		3209.74				3060.28	3060.99	3191.9	3180.21	3192.17	3191.9							1644.09	1612.11	3182.72	1612.11	3182.72	3186.49	1366.81	139.133	1399.19	139.133	139.133	1399.19	1642.16	1592.62	3181.15	1592.62	3181.15	1436.18	1419.85	1419.85	1219.02	1203.97	1203.97	1119.55	1115.34	1151.77	1115.34	1115.34	1151.77	1108.48
	3187.29	3209.74		3210.82				3155.21	3180.21	3192.17	3185.52	3197.23	3192.17							1656.55	1647.01	3186.49	1647.01	3186.49	3194.53	1386.28	242.569	1402.09	242.569	242.569	1402.09	1667.69	1656.68	3181.73	1656.68	3181.73	1453.28	1439.02	1439.02	1242.88	1241.04	1241.04	1137.08	1138.7	1160.16	1138.7	1138.7	1160.16	1132.26
	3188.02	3210.82						3157.86	3185.52	3197.23	3185.69	3206.19	3197.23							3160.42	3185.56	3194.53	3185.56	3194.53	3195.05	1395.5	358.359	1409.46	358.359	358.359	1409.46	3156.43	3181.95	3183.96	3181.95	3183.96	1453.57	1445.75	1445.75	1243.21	1241.88	1241.88	1145.23	1151.77	1169.49	1151.77	1151.77	1169.49	1142.11
								3158.07	3185.69	3206.19	3191.86	3206.58	3206.19							3161.11	3186.25	3195.05	3186.25	3195.05	3201.31	1395.57	434.458	1413.65	434.458	434.458	1413.65	3156.71	3182.46	3187.42	3182.46	3187.42	1474.71	1458.31	1458.31	1251.81	1251.11	1251.11	1152.31	1160.16	1186.77	1160.16	1160.16	1186.77	1150.38
								3168.19	3191.86	3206.58	3192.17	3212.62	3206.58							3161.13	3187.03	3201.31	3187.03	3201.31	3202.89	1404.78	464.991	1455.76	464.991	464.991	1455.76	3159.92	3183.72	3188.51	3183.72	3188.51	1480.16	1461.69	1461.69	1255.28	1252.26	1252.26	1157.38	1169.49	1200.22	1169.49	1169.49	1200.22	1159.09
								3168.29	3192.17	3212.62	3192.42									3167.02	3189.61	3202.89	3189.61	3202.89	3208.01	1418.43	535.477	1474.77	535.477	535.477	1474.77	3160.54	3184.62	3189.52	3184.62	3189.52	1480.39	1477.32	1477.32	1255.49	1264.8	1264.8	1180.23	1186.77	1212.27	1186.77	1186.77	1212.27	1168.33
								3172.95	3192.42		3204.8									3170.87	3193.39	3208.01	3193.39	3208.01	3209.19	1481.45	584.58	1485.46	584.58	584.58	1485.46	3167.53	3187.46	3199.73	3187.46	3199.73	1491.86	1490.12	1490.12	1261.98	1273.48	1273.48	1198.35	1200.22	1233.99	1200.22	1200.22	1233.99	1181.09
								3181.17	3204.8		3205.16									3171.74	3193.86	3209.19	3193.86	3209.19	3220.72	1484.31	639.533	1499.26	639.533	639.533	1499.26	3168.42	3188.2	3199.78	3188.2	3199.78	1492.04	1500.4	1500.4	1342.85	1331.98	1331.98	1202.58	1212.27	1243.32	1212.27	1212.27	1243.32	1205.47
								3181.63	3205.16											3177.16	3198.76	3220.72	3198.76			1495.82	741.39	1508.95	741.39	741.39	1508.95	3175.61	3196.08	3206.68	3196.08		1521.35	1537.14	1537.14	1343.2	1344.22	1344.22	1234.12	1233.99	1252.83	1233.99	1233.99	1252.83	1217.15
																				3183.91	3205.02		3205.17			1516.08	801.882	1558.58	801.882	801.882	1558.58	3175.7	3196.11		3196.11		1661.64	1581.08	1581.08	1382.05	1352.29	1352.29	1235.47	1243.32	1283.11	1243.32	1243.32	1283.11	1236.67
																				3184.65	3205.17		3209.98			1544.65	821.123	1574.13	821.123	821.123	1574.13	3184.64	3207.71		3207.71		1661.84	1589.55	1589.55	1384.01	1393.63	1393.63	1250.51	1252.83	1302.12	1252.83	1252.83	1302.12	1245.5
																				3188.93	3209.98					1566.53	927.18	1592.3	927.18	927.18	1592.3	3185.01	3207.78				1662.16	1615.71	1615.71	1432.35	1401.59	1401.59	1282.64	1283.11	1306.48	1283.11	1283.11	1306.48	1276.36
																										1612.96	957.747	1602.14	957.747	957.747	1602.14						1662.29	1642.23	1642.23	1432.51	1403.08	1403.08	1293.72	1302.12	1326.95	1302.12	1302.12	1326.95	1285.32
																										1632.87	1007.88	1609.2	1007.88	1007.88	1609.2						1662.95	1661.65	1661.65	1434.82	1431.44	1431.44	1301.34	1306.48	1336.21	1306.48	1306.48	1336.21	1308.41
																										1640.97	1015.5	1615.76	1015.5	1015.5	1615.76						3172.12	3199.52	3199.52	1435.17	1437.07	1437.07	1324.21	1326.95	1343.8	1326.95	1326.95	1343.8	1319.48
																										1641.42	1128.84	1625.31	1128.84	1128.84	1625.31						3172.65	3200.13	3200.13	1455.6	1441.93	1441.93	1330.96	1336.21	1358.02	1336.21	1336.21	1358.02	1323.93
																										1655.12	1173.54	3199.41	1173.54	1173.54	3199.41						3172.83	3200.83	3200.83	1472.18	1459.13	1459.13	1351.76	1343.8	1384.37	1343.8	1343.8	1384.37	1350.29
																										1667.98	1231.2	3203.95	1231.2	1231.2	3203.95						3173.29	3202.73	3202.73	1472.31	1469.81	1469.81	1360.01	1358.02	1390.02	1358.02	1358.02	1390.02	1355.06
																										3179.08	1256.09	3206.46	1256.09	1256.09	3206.46						3173.48	3203.25	3203.25	1489.08	1496.4	1496.4	1383.06	1384.37	1413.24	1384.37	1384.37	1413.24	1387.38
																										3179.5	1331.33	3207.01	1331.33	1331.33	3207.01						3189.18	3211.87	3211.87	1489.59	1509.95	1509.95	1390.33	1390.02	1424.43	1390.02	1390.02	1424.43	1395.99
																										3181.23	1406.89	3209.04	1406.89	1406.89	3209.04						3189.23	3212.83	3212.83	1528.43	1511.3	1511.3	1413.22	1413.24	1440.56	1413.24	1413.24	1440.56	1399.32
																										3181.86	1424.3	3217.41	1424.3	1424.3	3217.41						3190.07	3213.69	3213.69	1541.77	1519.57	1519.57	1424.26	1424.43	1455.36	1424.43	1424.43	1455.36	1418.5
																										3195.19	1493.34	3219.27	1493.34	1493.34	3219.27						3190.22	3215.77	3215.77	1542.1	1537.78	1537.78	1452.45	1440.56	1473.52	1440.56	1440.56	1473.52	1447.79
																										3196.73	1576.99	3222.76	1576.99	1576.99	3222.76						3191.36	3216.31		1581.31	1557.02	1557.02	1456.41	1455.36	1488.21	1455.36	1455.36	1488.21	1454.21
																										3197.77	1605.62	3226.81	1605.62	1605.62	3226.81									1587.89	1561.94	1561.94	1468.4	1473.52	1500.73	1473.52	1473.52	1500.73	1463.4
																										3199.53	1628.32	3231.76	1628.32	1628.32	3231.76									1646.49	1579.81	1579.81	1498.46	1488.21	1517.66	1488.21	1488.21	1517.66	1477.62
																										3211.92	3207.32	3247.31	3207.32	3207.32	3247.31									1660.93	1612.31	1612.31	1506.1	1500.73	1535.28	1500.73	1500.73	1535.28	1514.88
																										3212.25	3220.38		3220.38	3220.38										1661.09	1622.19	1622.19	1556.62	1517.66	1539.92	1517.66	1517.66	1539.92	1549.06
																										3229.77	3233.69		3233.69	3233.69										1661.1	1640.05	1640.05	1558.97	1535.28	1547.15	1535.28	1535.28	1547.15	1557.35
																										3229.98	3251.78		3251.78	3251.78										1661.22	1676.45	1676.45	1578.29	1539.92	1569.04	1539.92	1539.92	1569.04	1568.97
																																								3172.61	3199.04	3199.04	1586.55	1547.15	1577.22	1547.15	1547.15	1577.22	1586.81
																																								3173.27	3199.67	3199.67	1597.54	1569.04	1590.38	1569.04	1569.04	1590.38	1594.21
																																								3173.76	3199.88	3199.88	1605.93	1577.22	3073.71	1577.22	1577.22	3073.71	1602.25
																																								3175.22	3200.92	3200.92	1607.45	1590.38	3076.12	1590.38	1590.38	3076.12	1617.4
																																								3175.38	3201.32	3201.32	3051.88	3073.71	3078.84	3073.71	3073.71	3078.84	3049.17
																																								3176.21	3201.91	3201.91	3054.94	3076.12	3081.11	3076.12	3076.12	3081.11	3051.45
																																								3190.2	3213.18	3213.18	3057.98	3078.84	3083.4	3078.84	3078.84	3083.4	3053.77
																																								3191.14	3213.74	3213.74	3059.89	3081.11	3090.91	3081.11	3081.11	3090.91	3055.59
																																								3191.58	3213.93	3213.93	3062.76	3083.4	3094.5	3083.4	3083.4	3094.5	3059.65
																																								3193.17	3214.62	3214.62	3071.68	3090.91	3097.06	3090.91	3090.91	3097.06	3063.32
																																								3193.41	3215.81	3215.81	3073.79	3094.5	3098.39	3094.5	3094.5	3098.39	3069.32
																																								3194.69	3216.13		3077.28	3097.06	3102.11	3097.06	3097.06	3102.11	3071.13
																																											3080.73	3098.39	3105.77	3098.39	3098.39	3105.77	3074.44
																																											3087.01	3102.11	3115.59	3102.11	3102.11	3115.59	3078.56
																																											3088.45	3105.77	3115.79	3105.77	3105.77		3086.54
																																											3100.07	3115.59		3115.59	3115.59		3100.1
																																											3102.61	3115.79		3115.79	3115.79		3104.55
																																											3104.47	3121.93					3118.05
[truncated: 4 more columns]

## Sheet: rates
precursor molecule	Fluorene								Cyclopenta[d,e,f]phenanthrene						Acenaphthylene						Fluoranthene						Perylene						Pyrene				Corannulene		Coronene		dibenzo[a,e]pyrene						dibenzo[a,l]pyrene
reaction no	1		2		3		4		5		6		7		8		9		10		11		12		13		14		15		16		17		18		19		20		21		22		23		24		25
reaction rate constant	energy (cm-1)	rate	energy (cm-1)	rate	energy (cm-1)	rate	energy (cm-1)	rate	energy (cm-1)	rate	energy (cm-1)	rate	energy (cm-1)	rate	energy (cm-1)	rate	energy (cm-1)	rate	energy (cm-1)	rate	energy (cm-1)	rate	energy (cm-1)	rate	energy (cm-1)	rate	energy (cm-1)	rate	energy (cm-1)	rate	energy (cm-1)	rate	energy (cm-1)	rate	energy (cm-1)	rate	energy (cm-1)	rate	energy (cm-1)	rate	energy (cm-1)	rate	energy (cm-1)	rate	energy (cm-1)	rate	energy (cm-1)	rate	energy (cm-1)
	33151	907.329	76660	11110.8	76660	12870.3	76660	49999.9	46856	4273.9	79800	2241.53	79800	53592.4	36369	1.52863e-13	36369	0	55800	11304.2	39265	5.22921e-20	57180	8309.95	57180	21701.4	36690	0	36690	1.3606e-23	69450	112230	40007	1.61611e-19	50850	2579.16	42510	1.52533e-24	53956	1.45615e-06	50123	0.0165823	50123	0.0029891	89760	2.2946e+06	39874	0.00146652	81060
	33171	917.876	76680	11174.6	76680	12939	76680	50283.2	46876	4334.59	79820	2262.82	79820	53921.4	36389	1.50295e-13	36389	0	55820	11396.1	39285	1.02532e-19	57200	8354.3	57200	21876.1	36720	0	36720	2.62551e-23	69480	112989	40037	1.56962e-19	50880	2609.67	42530	4.97826e-24	53976	1.48249e-06	50143	0.0167518	50143	0.00302448	89780	2.30116e+06	39894	0.00149095	81080
	33191	928.533	76700	11238.7	76700	13008	76700	50568	46896	4396.08	79840	2284.3	79840	54252.3	36409	1.47772e-13	36409	0	55840	11488.6	39305	2.51302e-19	57220	8398.86	57220	22052.2	36750	0	36750	5.06644e-23	69510	113752	40067	4.57348e-19	50910	2640.5	42550	1.36481e-23	53996	1.50927e-06	50163	0.0169228	50163	0.00306026	89800	2.30774e+06	39914	0.00151577	81100
	33211	939.301	76720	11303.2	76720	13077.3	76720	50854.2	46916	4458.38	79860	2305.97	79860	54585	36429	1.45292e-13	36429	0	55860	11581.9	39325	4.92749e-19	57240	8443.63	57240	22229.5	36780	0	36780	9.77687e-23	69540	114520	40097	1.18454e-18	50940	2671.66	42570	3.14991e-23	54016	1.53651e-06	50183	0.0170955	50183	0.00309643	89820	2.31434e+06	39934	0.00154097	81120
	33231	950.179	76740	11367.9	76740	13147	76740	51141.9	46936	4521.49	79880	2327.83	79880	54919.7	36449	4.28563e-13	36449	0	55880	11675.8	39345	8.21253e-19	57260	8488.61	57260	22408.1	36810	0	36810	1.53295e-22	69570	115293	40127	1.58196e-18	50970	2703.15	42590	6.40201e-23	54036	1.56422e-06	50203	0.0172698	50203	0.00313299	89840	2.32095e+06	39954	0.00156656	81140
	33251	961.169	76760	11433.1	76760	13217	76760	51431.1	46956	4585.43	79900	2349.89	79900	55256.1	36469	5.61834e-13	36469	0	55900	11770.3	39365	1.37351e-18	57280	8533.8	57280	22588	36840	0	36840	2.38939e-22	69600	116070	40157	2.9334e-18	51000	2734.97	42610	1.16676e-22	54056	1.5924e-06	50223	0.0174458	50223	0.00316996	89860	2.32758e+06	39974	0.00159254	81160
	33271	972.273	76780	11498.5	76780	13287.3	76780	51721.7	46976	4650.21	79920	2372.14	79920	55594.5	36489	5.52414e-13	36489	0	55920	11865.6	39385	2.08955e-18	57300	8579.2	57300	22769.2	36870	0	36870	3.8426e-22	69630	116852	40187	4.34166e-18	51030	2767.13	42630	1.96677e-22	54076	1.62107e-06	50243	0.0176234	50243	0.00320734	89880	2.33422e+06	39994	0.00161893	81180
	33291	983.491	76800	11564.3	76800	13358	76800	52013.9	46996	4715.84	79940	2394.59	79940	55934.8	36509	5.43156e-13	36509	0	55940	11961.6	39405	3.14123e-18	57320	8624.81	57320	22951.7	36900	0	36900	5.50882e-22	69660	117639	40217	6.32568e-18	51060	2799.64	42650	3.14527e-22	54096	1.65022e-06	50263	0.0178026	50263	0.00324512	89900	2.34089e+06	40014	0.00164573	81200
	33311	994.824	76820	11630.4	76820	13429	76820	52307.5	47016	4782.32	79960	2417.23	79960	56276.9	36529	8.01085e-13	36529	0	55960	12058.3	39425	4.41875e-18	57340	8670.63	57340	23135.6	36930	0	36930	7.97361e-22	69690	118430	40247	9.85651e-18	51090	2832.48	42670	4.81931e-22	54116	1.67987e-06	50283	0.0179836	50283	0.00328332	89920	2.34756e+06	40034	0.00167294	81220
	33331	1006.27	76840	11696.9	76840	13500.4	76840	52602.6	47036	4849.67	79980	2440.08	79980	56621	36549	1.44406e-12	36549	0	55980	12155.6	39445	6.25773e-18	57360	8716.67	57360	23320.8	36960	0	36960	1.17387e-21	69720	119226	40277	1.26825e-17	51120	2865.67	42690	7.12883e-22	54136	1.71002e-06	50303	0.0181662	50303	0.00332193	89940	2.35426e+06	40054	0.00170056	81240
	33351	1017.84	76860	11763.7	76860	13572.1	76860	52899.2	47056	4917.9	80000	2463.13	80000	56967	36569	1.54896e-12	36569	0	56000	12253.7	39465	8.32341e-18	57380	8762.92	57380	23507.4	36990	0	36990	1.623e-21	69750	120027	40307	1.79957e-17	51150	2899.22	42710	1.01802e-21	54156	1.74068e-06	50323	0.0183506	50323	0.00336097	89960	2.36097e+06	40074	0.00172862	81260
	33371	1029.52	76880	11830.9	76880	13644.1	76880	53197.4	47076	4987.02	80020	2486.38	80020	57314.9	36589	1.52304e-12	36589	0	56020	12352.5	39485	1.11472e-17	57400	8809.38	57400	23695.3	37020	0	37020	2.23677e-21	69780	120833	40337	2.35811e-17	51180	2933.11	42730	1.41337e-21	54176	1.77187e-06	50343	0.0185367	50343	0.00340044	89980	2.3677e+06	40094	0.0017571	81280
	33391	1041.33	76900	11898.4	76900	13716.5	76900	53497	47096	5057.04	80040	2509.84	80040	57664.8	36609	1.62236e-12	36609	0	56040	12452	39505	1.45999e-17	57420	8856.07	57420	23884.6	37050	0	37050	3.07158e-21	69810	121643	40367	3.00858e-17	51210	2967.36	42750	1.91976e-21	54196	1.80358e-06	50363	0.0187245	50363	0.00344033	90000	2.37444e+06	40114	0.00178602	81300
	33411	1053.25	76920	11966.3	76920	13789.2	76920	53798.2	47116	5127.96	80060	2533.5	80060	58016.6	36629	2.4542e-12	36629	0	56060	12552.2	39525	1.88434e-17	57440	8902.96	57440	24075.2	37080	0	37080	4.08057e-21	69840	122458	40397	4.01847e-17	51240	3001.97	42770	2.55603e-21	54216	1.83583e-06	50383	0.0189141	50383	0.00348067	90020	2.3812e+06	40134	0.00181539	81320
	33431	1065.3	76940	12034.5	76940	13862.3	76940	54100.9	47136	5199.81	80080	2557.37	80080	58370.4	36649	3.13712e-12	36649	0	56080	12653.2	39545	2.38274e-17	57460	8950.08	57460	24267.3	37110	0	37110	5.40748e-21	69870	123278	40427	4.92517e-17	51270	3036.95	42790	3.34522e-21	54236	1.86863e-06	50403	0.0191054	50403	0.00352144	90040	2.38798e+06	40154	0.00184521	81340
	33451	1077.47	76960	12103	76960	13935.7	76960	54405.2	47156	5272.59	80100	2581.46	80100	58726.2	36669	3.32198e-12	36669	0	56100	12754.9	39565	2.98148e-17	57480	8997.41	57480	24460.7	37140	0	37140	7.10287e-21	69900	124103	40457	6.32004e-17	51300	3072.29	42810	4.3092e-21	54256	1.90198e-06	50423	0.0192986	50423	0.00356265	90060	2.39478e+06	40174	0.00187548	81360
	33471	1089.76	76980	12172	76980	14009.5	76980	54710.9	47176	5346.32	80120	2605.75	80120	59083.9	36689	3.38315e-12	36689	0	56120	12857.3	39585	3.716e-17	57500	9044.97	57500	24655.6	37170	0	37170	9.21546e-21	69930	124933	40487	7.83422e-17	51330	3108	42830	5.47597e-21	54276	1.9359e-06	50443	0.0194935	50443	0.00360432	90080	2.40159e+06	40194	0.00190622	81380
	33491	1102.18	77000	12241.2	77000	14083.6	77000	55018.3	47196	5421	80140	2630.26	80140	59443.7	36709	4.12963e-12	36709	0	56140	12960.5	39605	4.55153e-17	57520	9092.74	57520	24851.8	37200	0	37200	1.18696e-20	69960	125768	40517	9.60191e-17	51360	3144.08	42850	6.88068e-21	54296	1.97039e-06	50463	0.0196903	50463	0.00364644	90100	2.40842e+06	40214	0.00193742	81400
	33511	1114.72	77020	12310.8	77020	14158.1	77020	55327.2	47216	5496.64	80160	2654.98	80160	59805.4	36729	5.18867e-12	36729	0	56160	13064.4	39625	5.55457e-17	57540	9140.73	57540	25049.5	37230	0	37230	1.52049e-20	69990	126607	40547	1.20286e-16	51390	3180.55	42870	8.55988e-21	54316	2.00546e-06	50483	0.0198889	50483	0.00368901	90120	2.41526e+06	40234	0.0019691	81420
	33531	1127.39	77040	12380.8	77040	14232.9	77040	55637.7	47236	5573.26	80180	2679.92	80180	60169.2	36749	6.21123e-12	36749	0	56180	13169.1	39645	6.71076e-17	57560	9188.95	57560	25248.6	37260	0	37260	1.93026e-20	70020	127452	40577	1.44952e-16	51420	3217.39	42890	1.05553e-20	54336	2.04113e-06	50503	0.0200893	50503	0.00373205	90140	2.42213e+06	40254	0.00200127	81440
	33551	1140.19	77060	12451.2	77060	14308.1	77060	55949.7	47256	5650.87	80200	2705.08	80200	60534.9	36769	6.43481e-12	36769	0	56200	13274.5	39665	8.08044e-17	57580	9237.39	57580	25449.2	37290	0	37290	2.43174e-20	70050	128302	40607	1.78239e-16	51450	3254.61	42910	1.29101e-20	54356	2.07739e-06	50523	0.0202916	50523	0.00377555	90160	2.429e+06	40274	0.00203392	81460
	33571	1153.12	77080	12521.9	77080	14383.6	77080	56263.4	47276	5729.48	80220	2730.46	80220	60902.8	36789	6.75649e-12	36789	0	56220	13380.7	39685	9.64288e-17	57600	9286.05	57600	25651.2	37320	0	37320	3.05309e-20	70080	129156	40637	2.15659e-16	51480	3292.22	42930	1.56757e-20	54376	2.11426e-06	50543	0.0204958	50543	0.00381953	90180	2.4359e+06	40294	0.00206707	81480
	33591	1166.17	77100	12592.9	77100	14459.5	77100	56578.6	47296	5809.1	80240	2756.07	80240	61272.6	36809	8.33119e-12	36809	0	56240	13487.7	39705	1.14665e-16	57620	9334.94	57620	25854.6	37350	0	37350	3.80664e-20	70110	130016	40667	2.59421e-16	51510	3330.23	42950	1.89158e-20	54396	2.15175e-06	50563	0.0207019	50563	0.00386398	90200	2.44281e+06	40314	0.00210073	81500
	33611	1179.36	77120	12664.4	77120	14535.8	77120	56895.4	47316	5889.75	80260	2781.89	80260	61644.5	36829	9.74787e-12	36829	0	56260	13595.4	39725	1.35541e-16	57640	9384.05	57640	26059.5	37380	0	37380	4.71946e-20	70140	130881	40697	3.15438e-16	51540	3368.63	42970	2.27001e-20	54416	2.18988e-06	50583	0.0209099	50583	0.00390892	90220	2.44974e+06	40334	0.00213489	81520
	33631	1192.68	77140	12736.2	77140	14612.4	77140	57213.8	47336	5971.43	80280	2807.95	80280	62018.5	36849	1.11151e-11	36849	0	56280	13703.9	39745	1.59664e-16	57660	9433.39	57660	26265.9	37410	0	37410	5.83029e-20	70170	131751	40727	3.74904e-16	51570	3407.42	42990	2.71033e-20	54436	2.22864e-06	50603	0.0211198	50603	0.00395434	90240	2.45669e+06	40354	0.00216957	81540
	33651	1206.14	77160	12808.3	77160	14689.3	77160	57533.9	47356	6054.17	80300	2834.23	80300	62394.5	36869	1.16319e-11	36869	0	56300	13813.2	39765	1.87074e-16	57680	9482.96	57680	26473.8	37440	0	37440	7.16844e-20	70200	132626	40757	4.50294e-16	51600	3446.62	43010	3.22087e-20	54456	2.26805e-06	50623	0.0213317	50623	0.00400025	90260	2.46365e+06	40374	0.00220478	81560
	33671	1219.73	77180	12880.9	77180	14766.7	77180	57855.5	47376	6137.96	80320	2860.74	80320	62772.6	36889	1.33118e-11	36889	0	56320	13923.2	39785	2.18461e-16	57700	9532.75	57700	26683.2	37470	0	37470	8.76783e-20	70230	133506	40787	5.36451e-16	51630	3486.22	43030	3.81104e-20	54476	2.30812e-06	50643	0.0215455	50643	0.00404666	90280	2.47064e+06	40394	0.00224052	81580
	33691	1233.46	77200	12953.8	77200	14844.4	77200	58178.8	47396	6222.83	80340	2887.48	80340	63152.8	36909	1.53205e-11	36909	0	56340	14034.1	39805	2.54357e-16	57720	9582.77	57720	26894.1	37500	0	37500	1.06902e-19	70260	134391	40817	6.34118e-16	51660	3526.23	43050	4.49182e-20	54496	2.34886e-06	50663	0.0217613	50663	0.00409356	90300	2.47763e+06	40414	0.0022768	81600
	33711	1247.32	77220	13027	77220	14922.5	77220	58503.7	47416	6308.78	80360	2914.46	80360	63535.2	36929	1.76402e-11	36929	0	56360	14145.7	39825	2.94975e-16	57740	9633.02	57740	27106.5	37530	0	37530	1.29859e-19	70290	135282	40847	7.54079e-16	51690	3566.66	43070	5.27535e-20	54516	2.39029e-06	50683	0.0219791	50683	0.00414098	90320	2.48465e+06	40434	0.00231363	81620
	33731	1261.33	77240	13100.7	77240	15000.9	77240	58830.2	47436	6395.83	80380	2941.67	80380	63919.6	36949	1.91284e-11	36949	0	56380	14258.2	39845	3.41179e-16	57760	9683.51	57760	27320.4	37560	0	37560	1.5704e-19	70320	136178	40877	8.8492e-16	51720	3607.5	43090	6.17471e-20	54536	2.4324e-06	50703	0.0221989	50703	0.0041889	90340	2.49168e+06	40454	0.00235101	81640
	33751	1275.47	77260	13174.7	77260	15079.7	77260	59158.4	47456	6483.99	80400	2969.12	80400	64306.1	36969	2.05624e-11	36969	0	56400	14371.4	39865	3.93665e-16	57780	9734.22	57780	27535.9	37590	0	37590	1.89353e-19	70350	137079	40907	1.04296e-15	51750	3648.76	43110	7.2048e-20	54556	2.47522e-06	50723	0.0224208	50723	0.00423734	90360	2.49873e+06	40474	0.00238896	81660
	33771	1289.75	77280	13249.1	77280	15158.9	77280	59488.3	47476	6573.28	80420	2996.81	80420	64694.8	36989	2.33037e-11	36989	0	56420	14485.5	39885	4.52895e-16	57800	9785.17	57800	27752.9	37620	0	37620	2.2762e-19	70380	137985	40937	1.22404e-15	51780	3690.45	43130	8.3821e-20	54576	2.51875e-06	50743	0.0226447	50743	0.0042863	90380	2.5058e+06	40494	0.00242748	81680
	33791	1304.18	77300	13323.9	77300	15238.5	77300	59819.8	47496	6663.71	80440	3024.74	80440	65085.7	37009	2.66618e-11	37009	0	56440	14600.4	39905	5.19444e-16	57820	9836.35	57820	27971.5	37650	0	37650	2.72653e-19	70410	138897	40967	1.4267e-15	51810	3732.56	43150	9.72563e-20	54596	2.56301e-06	50763	0.0228706	50763	0.00433579	90400	2.51289e+06	40514	0.00246657	81700
	33811	1318.75	77320	13399.1	77320	15318.4	77320	60153	47516	6755.28	80460	3052.91	80460	65478.7	37029	2.94636e-11	37029	0	56460	14716.1	39925	5.94917e-16	57840	9887.77	57840	28191.6	37680	0	37680	3.25639e-19	70440	139813	40997	1.66892e-15	51840	3775.11	43170	1.12562e-19	54616	2.608e-06	50783	0.0230986	50783	0.00438581	90420	2.51999e+06	40534	0.00250626	81720
	33831	1333.46	77340	13474.6	77340	15398.7	77340	60487.8	47536	6848.03	80480	3081.33	80480	65873.9	37049	3.20789e-11	37049	0	56480	14832.6	39945	6.796e-16	57860	9939.42	57860	28413.3	37710	0	37710	3.87938e-19	70470	140736	41027	1.93759e-15	51870	3818.09	43190	1.29968e-19	54636	2.65374e-06	50803	0.0233288	50803	0.00443636	90440	2.52711e+06	40554	0.00254653	81740
	33851	1348.32	77360	13550.6	77360	15479.4	77360	60824.4	47556	6941.95	80500	3110	80500	66271.2	37069	3.57868e-11	37069	0	56500	14949.9	39965	7.74233e-16	57880	9991.3	57880	28636.6	37740	0	37740	4.60787e-19	70500	141664	41057	2.25267e-15	51900	3861.51	43210	1.49724e-19	54656	2.70024e-06	50823	0.023561	50823	0.00448746	90460	2.53424e+06	40574	0.00258741	81760
	33871	1363.33	77380	13626.9	77380	15560.5	77380	61162.6	47576	7037.06	80520	3138.91	80520	66670.7	37089	3.98633e-11	37089	0	56520	15068.1	39985	8.80738e-16	57900	10043.4	57900	28861.5	37770	0	37770	5.45865e-19	70530	142597	41087	2.61155e-15	51930	3905.38	43230	1.72112e-19	54676	2.74751e-06	50843	0.0237954	50843	0.0045391	90480	2.5414e+06	40594	0.0026289	81780
	33891	1378.49	77400	13703.6	77400	15641.9	77400	61502.5	47596	7133.38	80540	3168.08	80540	67072.5	37109	4.43692e-11	37109	0	56540	15187.2	40005	9.99853e-16	57920	10095.8	57920	29088	37800	0	37800	6.45184e-19	70560	143535	41117	3.01588e-15	51960	3949.69	43250	1.9745e-19	54696	2.79557e-06	50863	0.0240319	50863	0.0045913	90500	2.54857e+06	40614	0.00267102	81800
	33911	1393.79	77420	13780.7	77420	15723.8	77420	61844.2	47616	7230.92	80560	3197.5	80560	67476.4	37129	4.83923e-11	37129	0	56560	15307	40025	1.13275e-15	57940	10148.4	57940	29316.1	37830	0	37830	7.60678e-19	70590	144479	41147	3.4868e-15	51990	3994.45	43270	2.26079e-19	54716	2.84442e-06	50883	0.0242706	50883	0.00464405	90520	2.55576e+06	40634	0.00271376	81820
	33931	1409.25	77440	13858.2	77440	15806	77440	62187.5	47636	7329.69	80580	3227.17	80580	67882.6	37149	5.30634e-11	37149	0	56580	15427.8	40045	1.28099e-15	57960	10201.2	57960	29545.8	37860	0	37860	8.94698e-19	70620	145429	41177	4.01205e-15	52020	4039.67	43290	2.58374e-19	54736	2.89407e-06	50903	0.0245115	50903	0.00469737	90540	2.56297e+06	40654	0.00275714	81840
	33951	1424.86	77460	13936.1	77460	15888.6	77460	62532.6	47656	7429.71	80600	3257.1	80600	68291	37169	5.84248e-11	37169	0	56600	15549.4	40065	1.44661e-15	57980	10254.3	57980	29777.2	37890	0	37890	1.05016e-18	70650	146384	41207	4.61681e-15	52050	4085.36	43310	2.9474e-19	54756	2.94455e-06	50923	0.0247546	50923	0.00475126	90560	2.57019e+06	40674	0.00280116	81860
	33971	1440.62	77480	14014.4	77480	15971.6	77480	62879.4	47676	7530.99	80620	3287.29	80620	68701.7	37189	6.53587e-11	37189	0	56620	15671.8	40085	1.63016e-15	58000	10307.6	58000	30010.2	37920	0	37920	1.23e-18	70680	147345	41237	5.30356e-15	52080	4131.5	43330	3.35632e-19	54776	2.99587e-06	50943	0.0249999	50943	0.00480572	90580	2.57743e+06	40694	0.00284584	81880
	33991	1456.54	77500	14093	77500	16055	77500	63227.9	47696	7633.56	80640	3317.75	80640	69114.6	37209	7.08404e-11	37209	0	56640	15795.1	40105	1.8351e-15	58020	10361.2	58020	30244.9	37950	0	37950	1.43752e-18	70710	148311	41267	6.07325e-15	52110	4178.11	43350	3.8155e-19	54796	3.04803e-06	50963	0.0252475	50963	0.00486076	90600	2.58469e+06	40714	0.00289118	81900
	34011	1472.61	77520	14172.1	77520	16138.7	77520	63578.2	47716	7737.41	80660	3348.46	80660	69529.8	37229	7.75328e-11	37229	0	56660	15919.3	40125	2.06151e-15	58040	10415	58040	30481.2	37980	8.89468e-24	37980	1.67684e-18	70740	149283	41297	6.95671e-15	52140	4225.2	43370	4.33039e-19	54816	3.10105e-06	50983	0.0254973	50983	0.00491639	90620	2.59197e+06	40734	0.0029372	81920
	34031	1488.84	77540	14251.6	77540	16222.9	77540	63930.2	47736	7842.57	80680	3379.44	80680	69947.2	37249	8.54443e-11	37249	0	56680	16044.4	40145	2.31356e-15	58060	10469.1	58060	30719.2	38010	2.57648e-23	38010	1.95228e-18	70770	150260	41327	7.94176e-15	52170	4272.76	43390	4.907e-19	54836	3.15494e-06	51003	0.0257494	51003	0.00497261	90640	2.59927e+06	40754	0.0029839	81940
	34051	1505.23	77560	14331.5	77560	16307.5	77560	64284	47756	7949.06	80700	3410.69	80700	70367	37269	9.40779e-11	37269	0	56700	16170.4	40165	2.59185e-15	58080	10523.4	58080	30959	38040	4.97554e-23	38040	2.26866e-18	70800	151243	41357	9.06254e-15	52200	4320.81	43410	5.55178e-19	54856	3.20972e-06	51023	0.0260038	51023	0.00502943	90660	2.60658e+06	40774	0.00303129	81960
	34071	1521.79	77580	14411.8	77580	16392.4	77580	64639.6	47776	8056.88	80720	3442.21	80720	70789	37289	1.02615e-10	37289	0	56720	16297.2	40185	2.90007e-15	58100	10577.9	58100	31200.4	38070	8.80788e-23	38070	2.63164e-18	70830	152232	41387	1.03277e-14	52230	4369.33	43430	6.27193e-19	54876	3.2654e-06	51043	0.0262605	51043	0.00508685	90680	2.61391e+06	40794	0.00307938	81980
	34091	1538.5	77600	14492.4	77600	16477.8	77600	64996.9	47796	8166.06	80740	3474.01	80740	71213.4	37309	1.11539e-10	37309	0	56740	16425	40205	3.23996e-15	58120	10632.7	58120	31443.5	38100	1.31439e-22	38100	3.04751e-18	70860	153227	41417	1.17393e-14	52260	4418.35	43450	7.07541e-19	54896	3.32199e-06	51063	0.0265196	51063	0.00514488	90700	2.62126e+06	40814	0.00312818	82000
	34111	1555.37	77620	14573.5	77620	16563.5	77620	65356.1	47816	8276.6	80760	3506.07	80760	71640	37329	1.21916e-10	37329	0	56760	16553.6	40225	3.61645e-15	58140	10687.7	58140	31688.3	38130	2.31442e-22	38130	3.52305e-18	70890	154227	41447	1.33409e-14	52290	4467.86	43470	7.97086e-19	54916	3.37951e-06	51083	0.026781	51083	0.00520353	90720	2.62863e+06	40834	0.0031777	82020
	34131	1572.42	77640	14655	77640	16649.7	77640	65717	47836	8388.53	80780	3538.41	80780	72069.1	37349	1.33464e-10	37349	0	56780	16683.2	40245	4.03029e-15	58160	10743	58160	31934.9	38160	3.67674e-22	38160	4.06608e-18	70920	155233	41477	1.51287e-14	52320	4517.88	43490	8.96768e-19	54936	3.43798e-06	51103	0.0270448	51103	0.0052628	90740	2.63601e+06	40854	0.00322796	82040
	34151	1589.62	77660	14737	77660	16736.2	77660	66079.7	47856	8501.86	80800	3571.03	80800	72500.4	37369	1.45655e-10	37369	0	56800	16813.6	40265	4.48672e-15	58180	10798.6	58180	32183.2	38190	5.43009e-22	38190	4.68564e-18	70950	156245	41507	1.71387e-14	52350	4568.39	43510	1.00761e-18	54956	3.4974e-06	51123	0.027311	51123	0.00532269	90760	2.64342e+06	40874	0.00327895	82060
	34171	1607	77680	14819.3	77680	16823.2	77680	66444.2	47876	8616.6	80820	3603.94	80820	72934.2	37389	1.57862e-10	37389	0	56820	16945	40285	4.98933e-15	58200	10854.4	58200	32433.3	38220	7.86547e-22	38220	5.39124e-18	70980	157263	41537	1.93952e-14	52380	4619.41	43530	1.13074e-18	54976	3.5578e-06	51143	0.0275796	51143	0.00538322	90780	2.65084e+06	40894	0.00333069	82080
	34191	1624.54	77700	14902.1	77700	16910.5	77700	66810.6	47896	8732.78	80840	3637.12	80840	73370.2	37409	1.71608e-10	37409	0	56840	17077.3	40305	5.54188e-15	58220	10910.4	58220	32685.2	38250	1.1231e-21	38250	6.19368e-18	71010	158286	41567	2.19115e-14	52410	4670.94	43550	1.2674e-18	54996	3.61918e-06	51163	0.0278506	51163	0.00544439	90800	2.65828e+06	40914	0.0033832	82100
	34211	1642.25	77720	14985.2	77720	16998.3	77720	67178.7	47916	8850.41	80860	3670.59	80860	73808.7	37429	1.87811e-10	37429	0	56860	17210.6	40325	6.14809e-15	58240	10966.7	58240	32938.8	38280	1.62373e-21	38280	7.1055e-18	71040	159316	41597	2.4739e-14	52440	4722.99	43570	1.41892e-18	55016	3.68157e-06	51183	0.0281241	51183	0.00550621	90820	2.66573e+06	40934	0.00343647	82120
	34231	1660.13	77740	15068.8	77740	17086.5	77740	67548.7	47936	8969.5	80880	3704.35	80880	74249.6	37449	2.05041e-10	37449	0	56880	17344.7	40345	6.81481e-15	58260	11023.3	58260	33194.2	38310	2.20376e-21	38310	8.14012e-18	71070	160351	41627	2.78848e-14	52470	4775.56	43590	1.58676e-18	55036	3.74497e-06	51203	0.0284001	51203	0.00556868	90840	2.67321e+06	40954	0.00349053	82140
	34251	1678.19	77760	15152.8	77760	17175.1	77760	67920.6	47956	9090.08	80900	3738.4	80900	74692.9	37469	2.21227e-10	37469	0	56900	17479.9	40365	7.54553e-15	58280	11080.1	58280	33451.4	38340	2.97018e-21	38340	9.31238e-18	71100	161393	41657	3.14021e-14	52500	4828.65	43610	1.77249e-18	55056	3.80941e-06	51223	0.0286785	51223	0.0056318	90860	2.6807e+06	40974	0.00354538	82160
	34271	1696.42	77780	15237.2	77780	17264.1	77780	68294.3	47976	9212.16	80920	3772.74	80920	75138.6	37489	2.39873e-10	37489	0	56920	17615.9	40385	8.34599e-15	58300	11137.1	58300	33710.4	38370	4.03162e-21	38370	1.06395e-17	71130	162440	41687	3.53294e-14	52530	4882.28	43630	1.97786e-18	55076	3.8749e-06	51243	0.0289595	51243	0.0056956	90880	2.68821e+06	40994	0.00360103	82180
	34291	1714.83	77800	15322.1	77800	17353.5	77800	68669.8	47996	9335.75	80940	3807.37	80940	75586.7	37509	2.60433e-10	37509	0	56940	17753	40405	9.22275e-15	58320	11194.5	58320	33971.3	38400	5.35505e-21	38400	1.21401e-17	71160	163494	41717	3.96946e-14	52560	4936.44	43650	2.20473e-18	55096	3.94145e-06	51263	0.0292431	51263	0.00576006	90900	2.69574e+06	41014	0.0036575	82200
	34311	1733.42	77820	15407.4	77820	17443.3	77820	69047.2	48016	9460.88	80960	3842.31	80960	76037.2	37529	2.8349e-10	37529	0	56960	17890.9	40425	1.01827e-14	58340	11252	58340	34234	38430	7.04143e-21	38430	1.38345e-17	71190	164553	41747	4.45658e-14	52590	4991.14	43670	2.45515e-18	55116	4.00908e-06	51283	0.0295291	51283	0.0058252	90920	2.70329e+06	41034	0.00371479	82220
	34331	1752.18	77840	15493.1	77840	17533.6	77840	69426.5	48036	9587.55	80980	3877.54	80980	76490.3	37549	3.06287e-10	37549	0	56980	18029.9	40445	1.12318e-14	58360	11309.9	58360	34498.5	38460	9.13525e-21	38460	1.57462e-17	71220	165619	41777	4.99678e-14	52620	5046.38	43690	2.73133e-18	55136	4.07782e-06	51303	0.0298178	51303	0.00589103	90940	2.71086e+06	41054	0.00377292	82240
	34351	1771.12	77860	15579.2	77860	17624.2	77860	69807.6	48056	9715.8	81000	3913.07	81000	76945.7	37569	3.31056e-10	37569	0	57000	18169.8	40465	1.23782e-14	58380	11368	58380	34764.9	38490	1.18048e-20	38490	1.79007e-17	71250	166691	41807	5.59783e-14	52650	5102.17	43710	3.03566e-18	55156	4.14766e-06	51323	0.0301091	51323	0.00595755	90960	2.71844e+06	41074	0.00383189	82260
	34371	1790.25	77880	15665.8	77880	17715.3	77880	70190.7	48076	9845.63	81020	3948.91	81020	77403.7	37589	3.57899e-10	37589	0	57020	18310.7	40485	1.36302e-14	58400	11426.3	58400	35033.1	38520	1.5126e-20	38520	2.03258e-17	71280	167768	41837	6.26564e-14	52680	5158.52	43730	3.37074e-18	55176	4.21865e-06	51343	0.030403	51343	0.00602476	90980	2.72605e+06	41094	0.00389173	82280
	34391	1809.56	77900	15752.8	77900	17806.8	77900	70575.6	48096	9977.07	81040	3985.05	81040	77864.1	37609	3.88424e-10	37609	0	57040	18452.6	40505	1.49961e-14	58420	11484.9	58420	35303.3	38550	1.92332e-20	38550	2.30532e-17	71310	168852	41867	7.00491e-14	52710	5215.42	43750	3.73942e-18	55196	4.29078e-06	51363	0.0306995	51363	0.00609268	91000	2.73367e+06	41114	0.00395243	82300
	34411	1829.06	77920	15840.2	77920	17898.8	77920	70962.5	48116	10110.1	81060	4021.5	81060	78327.1	37629	4.20353e-10	37629	0	57060	18595.4	40525	1.64852e-14	58440	11543.8	58440	35575.3	38580	2.42774e-20	38580	2.61177e-17	71340	169943	41897	7.82574e-14	52740	5272.89	43770	4.14475e-18	55216	4.36408e-06	51383	0.0309987	51383	0.00616132	91020	2.74131e+06	41134	0.00401401	82320
	34431	1848.74	77940	15928.1	77940	17991.1	77940	71351.3	48136	10244.8	81080	4058.27	81080	78792.6	37649	4.52753e-10	37649	0	57080	18739.3	40545	1.81078e-14	58460	11603	58460	35849.2	38610	3.05028e-20	38610	2.95569e-17	71370	171039	41927	8.73334e-14	52770	5330.93	43790	4.59005e-18	55236	4.43856e-06	51403	0.0313006	51403	0.00623067	91040	2.74897e+06	41154	0.00407649	82340
	34451	1868.61	77960	16016.4	77960	18083.9	77960	71742	48156	10381.2	81100	4095.35	81100	79260.5	37669	4.87735e-10	37669	0	57100	18884.1	40565	1.98743e-14	58480	11662.4	58480	36125.1	38640	3.80926e-20	38640	3.34134e-17	71400	172142	41957	9.73818e-14	52800	5389.54	43810	5.07891e-18	55256	4.51425e-06	51423	0.0316052	51423	0.00630075	91060	2.75664e+06	41174	0.00413988	82360
	34471	1888.67	77980	16105.2	77980	18177.1	77980	72134.6	48176	10519.2	81120	4132.74	81120	79731.1	37689	5.27273e-10	37689	0	57120	19030	40585	2.17974e-14	58500	11722.1	58500	36402.9	38670	4.72477e-20	38670	3.77341e-17	71430	173251	41987	1.08496e-13	52830	5448.73	43830	5.6152e-18	55276	4.59115e-06	51443	0.0319126	51443	0.00637156	91080	2.76434e+06	41194	0.00420418	82380
	34491	1908.92	78000	16194.4	78000	18270.8	78000	72529.1	48196	10659	81140	4170.46	81140	80204.1	37709	5.69119e-10	37709	0	57140	19176.9	40605	2.38877e-14	58520	11782	58520	36682.6	38700	5.84436e-20	38700	4.25696e-17	71460	174366	42017	1.20765e-13	52860	5508.5	43850	6.20315e-18	55296	4.6693e-06	51463	0.0322227	51463	0.00644311	91100	2.77205e+06	41214	0.00426941	82400
	34511	1929.36	78020	16284.1	78020	18364.9	78020	72925.7	48216	10800.4	81160	4208.49	81160	80679.8	37729	6.12393e-10	37729	0	57160	19324.8	40625	2.61598e-14	58540	11842.2	58540	36964.3	38730	7.19263e-20	38730	4.79771e-17	71490	175488	42047	1.34324e-13	52890	5568.86	43870	6.84727e-18	55316	4.74871e-06	51483	0.0325356	51483	0.0065154	91120	2.77979e+06	41234	0.00433559	82420
	34531	1950	78040	16374.2	78040	18459.4	78040	73324.1	48236	10943.6	81180	4246.85	81180	81158	37749	6.5882e-10	37749	0	57180	19473.7	40645	2.86279e-14	58560	11902.7	58560	37247.9	38760	8.80942e-20	38760	5.4019e-17	71520	176616	42077	1.4927e-13	52920	5629.81	43890	7.55248e-18	55336	4.8294e-06	51503	0.0328512	51503	0.00658845	91140	2.78754e+06	41254	0.00440272	82440
	34551	1970.83	78060	16464.7	78060	18554.3	78060	73724.6	48256	11088.6	81200	4285.53	81200	81638.8	37769	7.0963e-10	37769	0	57200	19623.7	40665	3.13074e-14	58580	11963.5	58580	37533.5	38790	1.07458e-19	38790	6.07635e-17	71550	177750	42107	1.6575e-13	52950	5691.36	43910	8.32406e-18	55356	4.91138e-06	51523	0.0331697	51523	0.00666226	91160	2.79531e+06	41274	0.00447082	82460
	34571	1991.86	78080	16555.7	78080	18649.7	78080	74127	48276	11235.3	81220	4324.55	81220	82122.2	37789	7.64754e-10	37789	0	57220	19774.7	40685	3.42131e-14	58600	12024.5	58600	37821.1	38820	1.30644e-19	38820	6.82861e-17	71580	178891	42137	1.8391e-13	52980	5753.52	43930	9.16772e-18	55376	4.99468e-06	51543	0.0334911	51543	0.00673684	91180	2.8031e+06	41294	0.0045399	82480
	34591	2013.09	78100	16647.2	78100	18745.6	78100	74531.4	48296	11383.8	81240	4363.89	81240	82608.2	37809	8.22747e-10	37809	0	57240	19926.8	40705	3.73646e-14	58620	12085.8	58620	38110.7	38850	1.58199e-19	38850	7.66702e-17	71610	180038	42167	2.039e-13	53010	5816.28	43950	1.00896e-17	55396	5.07932e-06	51563	0.0338153	51563	0.0068122	91200	2.81091e+06	41314	0.00460997	82500
	34611	2034.52	78120	16739.1	78120	18841.8	78120	74937.7	48316	11534.2	81260	4403.57	81260	83096.9	37829	8.8288e-10	37829	0	57260	20079.9	40725	4.07796e-14	58640	12147.3	58640	38402.3	38880	1.90938e-19	38880	8.60062e-17	71640	181192	42197	2.25902e-13	53040	5879.66	43970	1.10964e-17	55416	5.16532e-06	51583	0.0341424	51583	0.00688834	91220	2.81873e+06	41334	0.00468105	82520
	34631	2056.16	78140	16831.5	78140	18938.5	78140	75346.1	48336	11686.3	81280	4443.59	81280	83588.2	37849	9.47083e-10	37849	0	57280	20234	40745	4.44776e-14	58660	12209.2	58660	38696	38910	2.29676e-19	38910	9.6394e-17	71670	182353	42227	2.50076e-13	53070	5943.66	43990	1.21952e-17	55436	5.25269e-06	51603	0.0344725	51603	0.00696527	91240	2.82658e+06	41354	0.00475315	82540
	34651	2077.99	78160	16924.3	78160	19035.7	78160	75756.5	48356	11840.4	81300	4483.95	81300	84082.1	37869	1.01943e-09	37869	0	57300	20389.2	40765	4.84807e-14	58680	12271.3	58680	38991.7	38940	2.75369e-19	38940	1.07944e-16	71700	183520	42257	2.7665e-13	53100	6008.29	44010	1.33937e-17	55456	5.34146e-06	51623	0.0348054	51623	0.00704299	91260	2.83444e+06	41374	0.00482629	82560
	34671	2100.04	78180	17017.6	78180	19133.3	78180	76168.9	48376	11996.3	81320	4524.65	81320	84578.7	37889	1.09504e-09	37889	0	57320	20545.5	40785	5.28127e-14	58700	12333.7	58700	39289.4	38970	3.29307e-19	38970	1.20775e-16	71730	184694	42287	3.05829e-13	53130	6073.54	44030	1.47003e-17	55476	5.43166e-06	51643	0.0351414	51643	0.00712153	91280	2.84233e+06	41394	0.00490047	82580
	34691	2122.29	78200	17111.4	78200	19231.4	78200	76583.4	48396	12154.1	81340	4565.69	81340	85078	37909	1.17344e-09	37909	0	57340	20702.9	40805	5.74958e-14	58720	12396.4	58720	39589.2	39000	3.92616e-19	39000	1.3502e-16	71760	185874	42317	3.37843e-13	53160	6139.43	44050	1.61239e-17	55496	5.52329e-06	51663	0.0354803	51663	0.00720088	91300	2.85023e+06	41414	0.00497572	82600
	34711	2144.75	78220	17205.6	78220	19329.9	78220	76999.8	48416	12313.8	81360	4607.08	81360	85580	37929	1.25738e-09	37929	0	57360	20861.4	40825	6.2558e-14	58740	12459.3	58740	39891.1	39030	4.66672e-19	39030	1.50822e-16	71790	187061	42347	3.72966e-13	53190	6205.96	44070	1.7674e-17	55516	5.61639e-06	51683	0.0358222	51683	0.00728105	91320	2.85815e+06	41434	0.00505204	82620
	34731	2167.42	78240	17300.3	78240	19428.8	78240	77418.3	48436	12475.5	81380	4648.83	81380	86084.6	37949	1.34865e-09	37949	0	57380	21020.9	40845	6.80271e-14	58760	12522.6	58760	40195.1	39060	5.53409e-19	39060	1.68339e-16	71820	188254	42377	4.11446e-13	53220	6273.14	44090	1.93611e-17	55536	5.71097e-06	51703	0.0361672	51703	0.00736204	91340	2.86609e+06	41454	0.00512945	82640
	34751	2190.3	78260	17395.4	78260	19528.3	78260	77838.9	48456	12639.1	81400	4690.92	81400	86592	37969	1.44617e-09	37969	0	57400	21181.6	40865	7.3932e-14	58780	12586.1	58780	40501.2	39090	6.54638e-19	39090	1.87743e-16	71850	189455	42407	4.53608e-13	53250	6340.97	44110	2.11962e-17	55556	5.80706e-06	51723	0.0365153	51723	0.00744388	91360	2.87405e+06	41474	0.00520797	82660
	34771	2213.4	78280	17491.1	78280	19628.1	78280	78261.5	48476	12804.7	81420	4733.37	81420	87102.2	37989	1.54885e-09	37989	0	57420	21343.3	40885	8.03045e-14	58800	12649.9	58800	40809.4	39120	7.72415e-19	39120	2.09223e-16	71880	190662	42437	4.99762e-13	53280	6409.46	44130	2.31913e-17	55576	5.90468e-06	51743	0.0368664	51743	0.00752656	91380	2.88203e+06	41494	0.00528761	82680
	34791	2236.72	78300	17587.2	78300	19728.5	78300	78686.2	48496	12972.3	81440	4776.18	81440	87615	38009	1.65643e-09	38009	0	57440	21506.2	40905	8.71787e-14	58820	12713.9	58820	41119.7	39150	9.09357e-19	39150	2.32984e-16	71910	191876	42467	5.50254e-13	53310	6478.62	44150	2.53593e-17	55596	6.00386e-06	51763	0.0372206	51763	0.0076101	91400	2.89003e+06	41514	0.00536838	82700
	34811	2260.25	78320	17683.8	78320	19829.3	78320	79113	48516	13142	81460	4819.35	81460	88130.7	38029	1.77257e-09	38029	0	57460	21670.1	40925	9.45911e-14	58840	12778.3	58840	41432.2	39180	1.06822e-18	39180	2.59251e-16	71940	193097	42497	6.05486e-13	53340	6548.44	44170	2.77138e-17	55616	6.10461e-06	51783	0.037578	51783	0.00769449	91420	2.89805e+06	41534	0.00545029	82720
	34831	2284	78340	17780.8	78340	19930.5	78340	79541.9	48536	13313.7	81480	4862.89	81480	88649	38049	1.89811e-09	38049	0	57480	21835.3	40945	1.02579e-13	58860	12842.9	58860	41746.8	39210	1.25207e-18	39210	2.8827e-16	71970	194325	42527	6.65831e-13	53370	6618.93	44190	3.02697e-17	55636	6.20695e-06	51803	0.0379386	51803	0.00777976	91440	2.90608e+06	41554	0.00553338	82740
	34851	2307.98	78360	17878.4	78360	20032.2	78360	79972.9	48556	13487.4	81500	4906.79	81500	89170.2	38069	2.03035e-09	38069	0	57500	22001.5	40965	1.11184e-13	58880	12907.9	58880	42063.6	39240	1.4646e-18	39240	3.20307e-16	72000	195559	42557	7.31754e-13	53400	6690.11	44210	3.30429e-17	55656	6.31093e-06	51823	0.0383023	51823	0.0078659	91460	2.91414e+06	41574	0.00561764	82760
	34871	2332.17	78380	17976.4	78380	20134.4	78380	80405.9	48576	13663.3	81520	4951.07	81520	89694.2	38089	2.16812e-09	38089	0	57520	22168.9	40985	1.2045e-13	58900	12973.1	58900	42382.6	39270	1.70976e-18	39270	3.55654e-16	72030	196801	42587	8.03723e-13	53430	6761.98	44230	3.60503e-17	55676	6.41655e-06	51843	0.0386692	51843	0.00795293	91480	2.92222e+06	41594	0.00570309	82780
	34891	2356.6	78400	18074.9	78400	20237.1	78400	80841.1	48596	13841.3	81540	4995.71	81540	90221	38109	2.31573e-09	38109	0	57540	22337.4	41005	1.30424e-13	58920	13038.6	58920	42703.7	39300	1.99212e-18	39300	3.94627e-16	72060	198049	42617	8.8225e-13	53460	6834.53	44250	3.93102e-17	55696	6.52385e-06	51863	0.0390394	51863	0.00804086	91500	2.93031e+06	41614	0.00578976	82800
	34911	2381.25	78420	18173.9	78420	20340.2	78420	81278.5	48616	14021.4	81560	5040.73	81560	90750.6	38129	2.47524e-09	38129	0	57560	22507.1	41025	1.41154e-13	58940	13104.4	58940	43027.1	39330	2.31687e-18	39330	4.37574e-16	72090	199305	42647	9.67907e-13	53490	6907.79	44270	4.28422e-17	55716	6.63284e-06	51883	0.0394129	51883	0.00812968	91520	2.93842e+06	41634	0.00587765	82820
	34931	2406.12	78440	18273.4	78440	20443.8	78440	81717.9	48636	14203.7	81580	5086.13	81580	91283.1	38149	2.64341e-09	38149	0	57580	22677.9	41045	1.52694e-13	58960	13170.5	58960	43352.7	39360	2.68968e-18	39360	4.8487e-16	72120	200567	42677	1.06125e-12	53520	6981.74	44290	4.66672e-17	55736	6.74355e-06	51903	0.0397896	51903	0.00821942	91540	2.94656e+06	41654	0.00596679	82840
	34951	2431.23	78460	18373.4	78460	20547.8	78460	82159.5	48656	14388.2	81600	5131.92	81600	91818.4	38169	2.8208e-09	38169	0	57600	22849.9	41065	1.65097e-13	58980	13236.8	58980	43680.6	39390	3.1171e-18	39390	5.36923e-16	72150	201837	42707	1.16297e-12	53550	7056.41	44310	5.08076e-17	55756	6.85602e-06	51923	0.0401697	51923	0.00831008	91560	2.95471e+06	41674	0.00605718	82860
	34971	2456.57	78480	18473.9	78480	20652.4	78480	82603.2	48676	14574.9	81620	5178.08	81620	92356.5	38189	3.00847e-09	38189	0	57620	23023	41085	1.78427e-13	59000	13303.5	59000	44010.7	39420	3.60641e-18	39420	5.9418e-16	72180	203114	42737	1.27372e-12	53580	7131.8	44330	5.52875e-17	55776	6.97026e-06	51943	0.0405531	51943	0.00840167	91580	2.96288e+06	41694	0.00614885	82880
	34991	2482.15	78500	18574.8	78500	20757.4	78500	83049.2	48696	14763.9	81640	5224.64	81640	92897.6	38209	3.209e-09	38209	0	57640	23197.4	41105	1.92742e-13	59020	13370.4	59020	44343.1	39450	4.16561e-18	39450	6.57123e-16	72210	204398	42767	1.39426e-12	53610	7207.9	44350	6.01325e-17	55796	7.0863e-06	51963	0.0409399	51963	0.0084942	91600	2.97108e+06	41714	0.00624181	82900
	35011	2507.96	78520	18676.3	78520	20862.9	78520	83497.2	48716	14955.1	81660	5271.59	81660	93441.5	38229	3.42258e-09	38229	0	57660	23372.9	41125	2.08113e-13	59040	13437.7	59040	44677.7	39480	4.80383e-18	39480	7.26277e-16	72240	205689	42797	1.52541e-12	53640	7284.74	44370	6.53701e-17	55816	7.20417e-06	51983	0.0413301	51983	0.00858767	91620	2.97929e+06	41734	0.00633608	82920
	35031	2534.01	78540	18778.3	78540	20968.9	78540	83947.5	48736	15148.6	81680	5318.93	81680	93988.4	38249	3.64786e-09	38249	0	57680	23549.7	41145	2.24609e-13	59060	13505.3	59060	45014.6	39510	5.53152e-18	39510	8.02212e-16	72270	206987	42827	1.668e-12	53670	7362.31	44390	7.10299e-17	55836	7.32389e-06	52003	0.0417237	52003	0.0086821	91640	2.98752e+06	41754	0.00643167	82940
	35051	2560.3	78560	18880.8	78560	21075.3	78560	84400	48756	15344.4	81700	5366.66	81700	94538.1	38269	3.88486e-09	38269	0	57700	23727.6	41165	2.42308e-13	59080	13573.1	59080	45353.9	39540	6.3599e-18	39540	8.85548e-16	72300	208293	42857	1.82299e-12	53700	7440.61	44410	7.71431e-17	55856	7.4455e-06	52023	0.0421208	52023	0.00877749	91660	2.99577e+06	41774	0.00652861	82960
	35071	2586.83	78580	18983.7	78580	21182.3	78580	84854.6	48776	15542.6	81720	5414.8	81720	95090.8	38289	4.13716e-09	38289	0	57720	23906.7	41185	2.61287e-13	59100	13641.2	59100	45695.4	39570	7.30168e-18	39570	9.76955e-16	72330	209605	42887	1.99135e-12	53730	7519.67	44430	8.37435e-17	55876	7.56902e-06	52043	0.0425213	52043	0.00887386	91680	3.00404e+06	41794	0.0066269	82980
	35091	2613.61	78600	19087.2	78600	21289.7	78600	85311.5	48796	15743.1	81740	5463.34	81740	95646.5	38309	4.40622e-09	38309	0	57740	24087.1	41205	2.81635e-13	59120	13709.7	59120	46039.4	39600	8.37115e-18	39600	1.07716e-15	72360	210926	42917	2.17415e-12	53760	7599.48	44450	9.0867e-17	55896	7.69448e-06	52063	0.0429254	52063	0.00897121	91700	3.01233e+06	41814	0.00672658	83000
	35111	2640.63	78620	19191.2	78620	21397.6	78620	85770.6	48816	15946	81760	5512.28	81760	96205.1	38329	4.69117e-09	38329	0	57760	24268.7	41225	3.03441e-13	59140	13778.4	59140	46385.6	39630	9.5841e-18	39630	1.18696e-15	72390	212253	42947	2.37259e-12	53790	7680.05	44470	9.8552e-17	55916	7.8219e-06	52083	0.043333	52083	0.00906955	91720	3.02064e+06	41834	0.00682765	83020
	35131	2667.9	78640	19295.7	78640	21506	78640	86231.9	48836	16151.3	81780	5561.64	81780	96766.7	38349	4.9896e-09	38349	0	57780	24451.5	41245	3.26799e-13	59160	13847.5	59160	46734.2	39660	1.09581e-17	39660	1.30719e-15	72420	213588	42977	2.58784e-12	53820	7761.38	44490	1.06839e-16	55936	7.95132e-06	52103	0.0437441	52103	0.0091689	91740	3.02897e+06	41854	0.00693013	83040
	35151	2695.42	78660	19400.7	78660	21614.9	78660	86695.4	48856	16359.1	81800	5611.41	81800	97331.3	38369	5.3064e-09	38369	0	57800	24635.5	41265	3.51813e-13	59180	13916.8	59180	47085.2	39690	1.25128e-17	39690	1.43879e-15	72450	214930	43007	2.82128e-12	53850	7843.49	44510	1.15773e-16	55956	8.08277e-06	52123	0.0441589	52123	0.00926925	91760	3.03732e+06	41874	0.00703405	83060
	35171	2723.19	78680	19506.3	78680	21724.3	78680	87161.2	48876	16569.4	81820	5661.59	81820	97898.9	38389	5.64362e-09	38389	0	57820	24820.8	41285	3.78591e-13	59200	13986.5	59200	47438.6	39720	1.42701e-17	39720	1.58276e-15	72480	216280	43037	3.0743e-12	53880	7926.37	44530	1.25399e-16	55976	8.21627e-06	52143	0.0445773	52143	0.00937063	91780	3.04569e+06	41894	0.00713941	83080
	35191	2751.21	78700	19612.3	78700	21834.2	78700	87629.3	48896	16782.1	81840	5712.19	81840	98469.5	38409	6.00019e-09	38409	0	57840	25007.4	41305	4.07245e-13	59220	14056.4	59220	47794.4	39750	1.6254e-17	39750	1.74018e-15	72510	217637	43067	3.34843e-12	53910	8010.04	44550	1.35768e-16	55996	8.35187e-06	52163	0.0449993	52163	0.00947303	91800	3.05408e+06	41914	0.00724625	83100
	35211	2779.49	78720	19718.9	78720	21944.6	78720	88099.6	48916	16997.4	81860	5763.22	81860	99043.1	38429	6.37583e-09	38429	0	57860	25195.2	41325	4.37899e-13	59240	14126.7	59240	48152.6	39780	1.84915e-17	39780	1.91223e-15	72540	219002	43097	3.64535e-12	53940	8094.5	44570	1.46933e-16	56016	8.48957e-06	52183	0.0454251	52183	0.00957647	91820	3.06249e+06	41934	0.00735457	83120
	35231	2808.03	78740	19826	78740	22055.5	78740	88572.2	48936	17215.2	81880	5814.67	81880	99619.8	38449	6.77222e-09	38449	0	57880	25384.3	41345	4.7068e-13	59260	14197.2	59260	48513.3	39810	2.10124e-17	39810	2.10016e-15	72570	220374	43127	3.96675e-12	53970	8179.76	44590	1.5895e-16	56036	8.62943e-06	52203	0.0458545	52203	0.00968097	91840	3.07092e+06	41954	0.0074644	83140
	35251	2836.83	78760	19933.6	78760	22166.9	78760	89047.1	48956	17435.6	81900	5866.55	81900	100200	38469	7.19244e-09	38469	0	57900	25574.6	41365	5.05725e-13	59280	14268.1	59280	48876.4	39840	2.38494e-17	39840	2.30535e-15	72600	221754	43157	4.31456e-12	54000	8265.82	44610	1.7188e-16	56056	8.77147e-06	52223	0.0462877	52223	0.00978652	91860	3.07937e+06	41974	0.00757576	83160
	35271	2865.89	78780	20041.7	78780	22278.8	78780	89524.3	48976	17658.6	81920	5918.86	81920	100782	38489	7.63857e-09	38489	0	57920	25766.3	41385	5.43175e-13	59300	14339.3	59300	49242	39870	2.70393e-17	39870	2.52927e-15	72630	223142	43187	4.69078e-12	54030	8352.7	44630	1.85786e-16	56076	8.91571e-06	52243	0.0467246	52243	0.00989314	91880	3.08784e+06	41994	0.00768866	83180
	35291	2895.21	78800	20150.4	78800	22391.2	78800	90003.8	48996	17884.2	81940	5971.6	81940	101368	38509	8.10879e-09	38509	0	57940	25959.2	41405	5.83187e-13	59320	14410.8	59320	49610	39900	3.06224e-17	39900	2.77352e-15	72660	224537	43217	5.09755e-12	54060	8440.39	44650	2.00739e-16	56096	9.06221e-06	52263	0.0471653	52263	0.0100008	91900	3.09634e+06	42014	0.00780313	83200
	35311	2924.8	78820	20259.6	78820	22504.1	78820	90485.6	49016	18112.5	81960	6024.79	81960	101957	38529	8.60177e-09	38529	0	57960	26153.4	41425	6.25918e-13	59340	14482.6	59340	49980.6	39930	3.46432e-17	39930	3.03983e-15	72690	225940	43247	5.53722e-12	54090	8528.91	44670	2.1681e-16	56116	9.21098e-06	52283	0.0476099	52283	0.0101096	91920	3.10485e+06	42034	0.00791919	83220
	35331	2954.66	78840	20369.3	78840	22617.5	78840	90969.7	49036	18343.5	81980	6078.41	81980	102550	38549	9.12416e-09	38549	0	57980	26348.9	41445	6.71542e-13	59360	14554.7	59360	50353.7	39960	3.91511e-17	39960	3.33005e-15	72720	227351	43277	6.01222e-12	54120	8618.26	44690	2.34078e-16	56136	9.36206e-06	52303	0.0480584	52303	0.0102195	91940	3.11338e+06	42054	0.00803685	83240
	35351	2984.78	78860	20479.6	78860	22731.4	78860	91456.2	49056	18577.3	82000	6132.49	82000	103145	38569	9.67908e-09	38569	0	58000	26545.8	41465	7.20236e-13	59380	14627.1	59380	50729.3	39990	4.42005e-17	39990	3.64619e-15	72750	228769	43307	6.52523e-12	54150	8708.45	44710	2.52624e-16	56156	9.51548e-06	52323	0.0485107	52323	0.0103305	91960	3.12193e+06	42074	0.00815614	83260
	35371	3015.18	78880	20590.4	78880	22845.9	78880	91945	49076	18813.7	82020	6187.01	82020	103743	38589	1.02624e-08	38589	0	58020	26744	41485	7.72193e-13	59400	14699.9	59400	51107.4	40020	4.98512e-17	40020	3.9904e-15	72780	230196	43337	7.07905e-12	54180	8799.48	44730	2.72538e-16	56176	9.67129e-06	52343	0.0489669	52343	0.0104426	91980	3.1305e+06	42094	0.00827708	83280
	35391	3045.86	78900	20701.8	78900	22960.9	78900	92436.2	49096	19053	82040	6241.98	82040	104345	38609	1.08765e-08	38609	0	58040	26943.4	41505	8.27615e-13	59420	14772.9	59420	51488.1	40050	5.61694e-17	40050	4.36501e-15	72810	231630	43367	7.6767e-12	54210	8891.37	44750	2.93912e-16	56196	9.82951e-06	52363	0.0494271	52363	0.0105559	92000	3.13909e+06	42114	0.00839968	83300
	35411	3076.81	78920	20813.7	78920	23076.3	78920	92929.8	49116	19295.1	82060	6297.41	82060	104950	38629	1.15256e-08	38629	0	58060	27144.3	41525	8.86714e-13	59440	14846.3	59440	51871.4	40080	6.3228e-17	40080	4.77254e-15	72840	233072	43397	8.32145e-12	54240	8984.11	44770	3.16847e-16	56216	9.99017e-06	52383	0.0498913	52383	0.0106703	92020	3.1477e+06	42134	0.00852398	83320
	35431	3108.04	78940	20926.1	78940	23192.3	78940	93425.7	49136	19540	82080	6353.3	82080	105558	38649	1.22103e-08	38649	0	58080	27346.5	41545	9.49714e-13	59460	14920	59460	52257.2	40110	7.11069e-17	40110	5.21568e-15	72870	234522	43427	9.0167e-12	54270	9077.72	44790	3.41448e-16	56236	1.01533e-05	52403	0.0503595	52403	0.0107858	92040	3.15634e+06	42154	0.00864999	83340
	35451	3139.55	78960	21039.1	78960	23308.9	78960	93924	49156	19787.8	82100	6409.65	82100	106169	38669	1.29339e-08	38669	0	58100	27550	41565	1.01686e-12	59480	14994	59480	52645.7	40140	7.98942e-17	40140	5.69734e-15	72900	235980	43457	9.76618e-12	54300	9172.21	44810	3.67829e-16	56256	1.0319e-05	52423	0.0508318	52423	0.0109025	92060	3.16499e+06	42174	0.00877773	83360
	35471	3171.34	78980	21152.7	78980	23425.9	78980	94424.7	49176	20038.5	82120	6466.47	82120	106784	38689	1.36942e-08	38689	0	58120	27754.9	41585	1.08839e-12	59500	15068.4	59500	53036.8	40170	8.96868e-17	40170	6.22066e-15	72930	237446	43487	1.05738e-11	54330	9267.58	44830	3.96108e-16	56276	1.04872e-05	52443	0.0513081	52443	0.0110204	92080	3.17366e+06	42194	0.00890723	83380
	35491	3203.42	79000	21266.7	79000	23543.5	79000	94927.8	49196	20292.1	82140	6523.76	82140	107401	38709	1.44937e-08	38709	0	58140	27961.1	41605	1.16458e-12	59520	15143	59520	53430.5	40200	1.00591e-16	40200	6.78899e-15	72960	238920	43517	1.14438e-11	54360	9363.83	44850	4.26413e-16	56296	1.06581e-05	52463	0.0517886	52463	0.0111394	92100	3.18236e+06	42214	0.0090385	83400
	35511	3235.79	79020	21381.4	79020	23661.6	79020	95433.3	49216	20548.7	82160	6581.52	82160	108022	38729	1.53383e-08	38729	0	58160	28168.8	41625	1.24571e-12	59540	15218	59540	53826.9	40230	1.12724e-16	40230	7.40596e-15	72990	240402	43547	1.23806e-11	54390	9460.98	44870	4.58879e-16	56316	1.08315e-05	52483	0.0522732	52483	0.0112597	92120	3.19107e+06	42234	0.00917158	83420
	35531	3268.44	79040	21496.6	79040	23780.3	79040	95941.3	49236	20808.3	82180	6639.76	82180	108646	38749	1.62316e-08	38749	0	58180	28377.8	41645	1.33208e-12	59560	15293.3	59560	54225.9	40260	1.26213e-16	40260	8.07546e-15	73020	241893	43577	1.3389e-11	54420	9559.04	44890	4.93649e-16	56336	1.10076e-05	52503	0.0527619	52503	0.0113811	92140	3.19981e+06	42254	0.00930648	83440
	35551	3301.39	79060	21612.4	79060	23899.4	79060	96451.7	49256	21070.9	82200	6698.49	82200	109274	38769	1.71699e-08	38769	0	58200	28588.2	41665	1.42399e-12	59580	15368.9	59580	54627.7	40290	1.41198e-16	40290	8.80166e-15	73050	243391	43607	1.44742e-11	54450	9658	44910	5.30876e-16	56356	1.11865e-05	52523	0.0532549	52523	0.0115038	92160	3.20857e+06	42274	0.00944322	83460
	35571	3334.64	79080	21728.7	79080	24019.1	79080	96964.5	49276	21336.6	82220	6757.69	82220	109905	38789	1.81555e-08	38789	0	58220	28800.1	41685	1.52177e-12	59600	15444.9	59600	55032.1	40320	1.57835e-16	40320	9.58907e-15	73080	244898	43637	1.56415e-11	54480	9757.88	44930	5.70722e-16	56376	1.13681e-05	52543	0.0537521	52543	0.0116277	92180	3.21734e+06	42294	0.00958184	83480
	35591	3368.17	79100	21845.6	79100	24139.4	79100	97479.8	49296	21605.3	82240	6817.39	82240	110539	38809	1.91944e-08	38809	0	58240	29013.3	41705	1.62578e-12	59620	15521.2	59620	55439.3	40350	1.7629e-16	40350	1.04425e-14	73110	246413	43667	1.68968e-11	54510	9858.69	44950	6.13358e-16	56396	1.15524e-05	52563	0.0542536	52563	0.0117529	92200	3.22614e+06	42314	0.00972235	83500
	35611	3402.01	79120	21963	79120	24260.2	79120	97997.6	49316	21877.2	82260	6877.57	82260	111176	38829	2.02896e-08	38829	0	58260	29227.9	41725	1.73638e-12	59640	15597.8	59640	55849.1	40380	1.96749e-16	40380	1.13672e-14	73140	247936	43697	1.82462e-11	54540	9960.43	44970	6.58966e-16	56416	1.17396e-05	52583	0.0547594	52583	0.0118793	92220	3.23496e+06	42334	0.00986477	83520
	35631	3436.15	79140	22081.1	79140	24381.5	79140	98517.8	49336	22152.3	82280	6938.25	82280	111817	38849	2.14415e-08	38849	0	58280	29444	41745	1.85395e-12	59660	15674.7	59660	56261.8	40410	2.19413e-16	40410	1.23686e-14	73170	249467	43727	1.96963e-11	54570	10063.1	44990	7.0774e-16	56436	1.19297e-05	52603	0.0552696	52603	0.0120069	92240	3.2438e+06	42354	0.0100091	83540
	35651	3470.6	79160	22199.7	79160	24503.4	79160	99040.6	49356	22430.6	82300	6999.43	82300	112461	38869	2.26528e-08	38869	0	58300	29661.5	41765	1.9789e-12	59680	15752	59680	56677.2	40440	2.44503e-16	40440	1.34527e-14	73200	251007	43757	2.12543e-11	54600	10166.7	45010	7.59884e-16	56456	1.21227e-05	52623	0.0557841	52623	0.0121358	92260	3.25266e+06	42374	0.0101555	83560
	35671	3505.34	79180	22318.8	79180	24625.8	79180	99565.8	49376	22712	82320	7061.12	82320	113109	38889	2.39255e-08	38889	0	58320	29880.5	41785	2.11167e-12	59700	15829.6	59700	57095.4	40470	2.72259e-16	40470	1.4626e-14	73230	252556	43787	2.29274e-11	54630	10271.3	45030	8.15615e-16	56476	1.23186e-05	52643	0.056303	52643	0.012266	92280	3.26154e+06	42394	0.0103038	83580
	35691	3540.4	79200	22438.6	79200	24748.7	79200	100094	49396	22996.8	82340	7123.31	82340	113760	38909	2.52659e-08	38909	0	58340	30100.9	41805	2.2527e-12	59720	15907.5	59720	57516.3	40500	3.02945e-16	40500	1.58952e-14	73260	254112	43817	2.47236e-11	54660	10376.9	45050	8.75164e-16	56496	1.25176e-05	52663	0.0568264	52663	0.0123976	92300	3.27045e+06	42414	0.0104541	83600
	35711	3575.77	79220	22558.9	79220	24872.3	79220	100624	49416	23284.9	82360	7186.02	82360	114415	38929	2.6678e-08	38929	0	58360	30322.8	41825	2.40247e-12	59740	15985.8	59740	57940.1	40530	3.36847e-16	40530	1.72678e-14	73290	255677	43847	2.66516e-11	54690	10483.4	45070	9.38774e-16	56516	1.27195e-05	52683	0.0573543	52683	0.0125304	92320	3.27937e+06	42434	0.0106065	83620
	35731	3611.45	79240	22679.8	79240	24996.3	79240	101157	49436	23576.2	82380	7249.23	82380	115072	38949	2.81593e-08	38949	0	58380	30546.1	41845	2.56148e-12	59760	16064.4	59760	58366.8	40560	3.74279e-16	40560	1.87516e-14	73320	257251	43877	2.87201e-11	54720	10590.9	45090	1.0067e-15	56536	1.29246e-05	52703	0.0578867	52703	0.0126645	92340	3.28831e+06	42454	0.010761	83640
	35751	3647.45	79260	22801.3	79260	25121	79260	101692	49456	23871	82400	7312.97	82400	115734	38969	2.97141e-08	38969	0	58400	30770.9	41865	2.73026e-12	59780	16143.4	59780	58796.3	40590	4.15582e-16	40590	2.03551e-14	73350	258833	43907	3.09388e-11	54750	10699.4	45110	1.07923e-15	56556	1.31328e-05	52723	0.0584236	52723	0.0128	92360	3.29728e+06	42474	0.0109175	83660
	35771	3683.76	79280	22923.4	79280	25246.1	79280	102230	49476	24169.1	82420	7377.23	82420	116398	38989	3.135e-08	38989	0	58420	30997.2	41885	2.90937e-12	59800	16222.7	59800	59228.6	40620	4.61128e-16	40620	2.20873e-14	73380	260424	43937	3.33179e-11	54780	10808.8	45130	1.15664e-15	56576	1.33441e-05	52743	0.0589651	52743	0.0129368	92380	3.30627e+06	42494	0.0110762	83680
	35791	3720.39	79300	23046.1	79300	25371.9	79300	102770	49496	24470.7	82440	7442.02	82440	117067	39009	3.30715e-08	39009	0	58440	31225	41905	3.0994e-12	59820	16302.3	59820	59663.8	40650	5.11323e-16	40650	2.39578e-14	73410	262024	43967	3.58681e-11	54810	10919.3	45150	1.23924e-15	56596	1.35587e-05	52763	0.0595113	52763	0.013075	92400	3.31527e+06	42514	0.011237	83700
	35811	3757.35	79320	23169.3	79320	25498.2	79320	103313	49516	24775.8	82460	7507.34	82460	117738	39029	3.48779e-08	39029	0	58460	31454.3	41925	3.30095e-12	59840	16382.3	59840	60102	40680	5.66607e-16	40680	2.5977e-14	73440	263632	43997	3.86011e-11	54840	11030.8	45170	1.32735e-15	56616	1.37766e-05	52783	0.0600621	52783	0.0132145	92420	3.3243e+06	42534	0.0113999	83720
	35831	3794.63	79340	23293.2	79340	25625	79340	103859	49536	25084.4	82480	7573.19	82480	118414	39049	3.67735e-08	39049	0	58480	31685.1	41945	3.51468e-12	59860	16462.6	59860	60543	40710	6.27461e-16	40710	2.81561e-14	73470	265249	44027	4.1529e-11	54870	11143.3	45190	1.42133e-15	56636	1.39977e-05	52803	0.0606176	52803	0.0133555	92440	3.33335e+06	42554	0.0115651	83740
	35851	3832.24	79360	23417.7	79360	25752.5	79360	104407	49556	25396.5	82500	7639.58	82500	119093	39069	3.87644e-08	39069	0	58500	31917.5	41965	3.74128e-12	59880	16543.2	59880	60987	40740	6.94406e-16	40740	3.05067e-14	73500	266874	44057	4.46648e-11	54900	11256.8	45210	1.52152e-15	56656	1.42222e-05	52823	0.0611778	52823	0.0134978	92460	3.34243e+06	42574	0.0117325	83760
	35871	3870.18	79380	23542.7	79380	25880.4	79380	104958	49576	25712.3	82520	7706.52	82520	119775	39089	4.08569e-08	39089	0	58520	32151.3	41985	3.98145e-12	59900	16624.2	59900	61434	40770	7.68011e-16	40770	3.30418e-14	73530	268509	44087	4.80223e-11	54930	11371.4	45230	1.62833e-15	56676	1.44501e-05	52843	0.0617428	52843	0.0136415	92480	3.35152e+06	42594	0.0119022	83780
	35891	3908.45	79400	23668.4	79400	26009	79400	105512	49596	26031.6	82540	7774	82540	120461	39109	4.30532e-08	39109	0	58540	32386.7	42005	4.23596e-12	59920	16705.6	59920	61883.9	40800	8.48892e-16	40800	3.57746e-14	73560	270152	44117	5.16161e-11	54960	11487	45250	1.74216e-15	56696	1.46815e-05	52863	0.0623126	52863	0.0137867	92500	3.36063e+06	42614	0.0120741	83800
	35911	3947.06	79420	23794.6	79420	26138.2	79420	106068	49616	26354.6	82560	7842.03	82560	121150	39129	4.53563e-08	39129	0	58560	32623.7	42025	4.50559e-12	59940	16787.2	59940	62336.8	40830	9.37718e-16	40830	3.87198e-14	73590	271804	44147	5.54617e-11	54990	11603.7	45270	1.86343e-15	56716	1.49164e-05	52883	0.0628873	52883	0.0139333	92520	3.36977e+06	42634	0.0122484	83820
	35931	3986	79440	23921.5	79440	26267.9	79440	106626	49636	26681.4	82580	7910.62	82580	121843	39149	4.77708e-08	39149	0	58580	32862.2	42045	4.79119e-12	59960	16869.3	59960	62792.7	40860	1.03522e-15	40860	4.18929e-14	73620	273465	44177	5.95758e-11	55020	11721.4	45290	1.99261e-15	56736	1.51548e-05	52903	0.0634668	52903	0.0140813	92540	3.37893e+06	42654	0.0124249	83840
	35951	4025.29	79460	24049	79460	26398.1	79460	107188	49656	27011.8	82600	7979.77	82600	122540	39169	5.03072e-08	39169	0	58600	33102.3	42065	5.09363e-12	59980	16951.7	59980	63251.6	40890	1.14218e-15	40890	4.53102e-14	73650	275135	44207	6.39757e-11	55050	11840.2	45310	2.13017e-15	56756	1.53968e-05	52923	0.0640513	52923	0.0142308	92560	3.38811e+06	42674	0.0126039	83860
	35971	4064.92	79480	24177.1	79480	26529	79480	107752	49676	27346	82620	8049.49	82620	123241	39189	5.29698e-08	39189	0	58620	33343.9	42085	5.41383e-12	60000	17034.4	60000	63713.6	40920	1.25945e-15	40920	4.89896e-14	73680	276815	44237	6.868e-11	55080	11960.1	45330	2.27662e-15	56776	1.56425e-05	52943	0.0646407	52943	0.0143818	92580	3.39731e+06	42694	0.0127853	83880
	35991	4104.89	79500	24305.8	79500	26660.5	79500	108319	49696	27684.1	82640	8119.77	82640	123945	39209	5.57604e-08	39209	0	58640	33587.1	42105	5.75276e-12	60020	17117.5	60020	64178.7	40950	1.38798e-15	40950	5.29498e-14	73710	278503	44267	7.37085e-11	55110	12081	45350	2.4325e-15	56796	1.58919e-05	52963	0.0652351	52963	0.0145342	92600	3.40653e+06	42714	0.012969	83900
	36011	4145.21	79520	24435.1	79520	26792.5	79520	108888	49716	28026	82660	8190.62	82660	124652	39229	5.86821e-08	39229	0	58660	33832	42125	6.11144e-12	60040	17201	60040	64646.8	40980	1.52875e-15	40980	5.72108e-14	73740	280200	44297	7.90819e-11	55140	12203.1	45370	2.59839e-15	56816	1.6145e-05	52983	0.0658345	52983	0.0146882	92620	3.41577e+06	42734	0.0131553	83920
	36031	4185.88	79540	24565	79540	26925.1	79540	109460	49736	28371.8	82680	8262.05	82680	125364	39249	6.17479e-08	39249	0	58680	34078.4	42145	6.49094e-12	60060	17284.8	60060	65118	41010	1.68286e-15	41010	6.17943e-14	73770	281906	44327	8.48225e-11	55170	12326.3	45390	2.77487e-15	56836	1.6402e-05	53003	0.066439	53003	0.0148436	92640	3.42504e+06	42754	0.013344	83940
	36051	4226.91	79560	24695.6	79560	27058.3	79560	110035	49756	28721.6	82700	8334.06	82700	126079	39269	6.49637e-08	39269	0	58700	34326.4	42165	6.89238e-12	60080	17368.9	60080	65592.3	41040	1.85149e-15	41040	6.67229e-14	73800	283622	44357	9.09536e-11	55200	12450.5	45410	2.96259e-15	56856	1.66628e-05	53023	0.0670486	53023	0.0150006	92660	3.43433e+06	42774	0.0135352	83960
	36071	4268.29	79580	24826.8	79580	27192.1	79580	110612	49776	29075.3	82720	8406.66	82720	126797	39289	6.83318e-08	39289	0	58720	34576.1	42185	7.31693e-12	60100	17453.4	60100	66069.8	41070	2.03591e-15	41070	7.20212e-14	73830	285346	44387	9.75001e-11	55230	12575.9	45430	3.16221e-15	56876	1.69276e-05	53043	0.0676634	53043	0.0151592	92680	3.44364e+06	42794	0.013729	83980
	36091	4310.03	79600	24958.6	79600	27326.5	79600	111193	49796	29433.1	82740	8479.85	82740	127520	39309	7.18611e-08	39309	0	58740	34827.4	42205	7.76585e-12	60120	17538.3	60120	66550.4	41100	2.23751e-15	41100	7.77152e-14	73860	287080	44417	1.04488e-10	55260	12702.4	45450	3.37444e-15	56896	1.71963e-05	53063	0.0682833	53063	0.0153193	92700	3.45297e+06	42814	0.0139254	84000
	36111	4352.13	79620	25091.1	79620	27461.5	79620	111776	49816	29794.9	82760	8553.63	82760	128246	39329	7.55568e-08	39329	0	58760	35080.3	42225	8.24042e-12	60140	17623.5	60140	67034.2	41130	2.45777e-15	41130	8.38325e-14	73890	288824	44447	1.11946e-10	55290	12830.1	45470	3.60002e-15	56916	1.74691e-05	53083	0.0689085	53083	0.0154809	92720	3.46232e+06	42834	0.0141244	84020
	36131	4394.6	79640	25224.2	79640	27597.1	79640	112362	49836	30160.9	82780	8628.01	82780	128976	39349	7.94299e-08	39349	0	58780	35334.9	42245	8.74201e-12	60160	17709.1	60160	67521.2	41160	2.69831e-15	41160	9.04028e-14	73920	290576	44477	1.19903e-10	55320	12958.9	45490	3.83974e-15	56936	1.7746e-05	53103	0.069539	53103	0.0156442	92740	3.4717e+06	42854	0.014326	84040
	36151	4437.43	79660	25357.9	79660	27733.2	79660	112950	49856	30531	82800	8703	82800	129710	39369	8.34895e-08	39369	0	58800	35591.1	42265	9.27205e-12	60180	17795.1	60180	68011.3	41190	2.96088e-15	41190	9.74574e-14	73950	292338	44507	1.28391e-10	55350	13088.9	45510	4.09444e-15	56956	1.8027e-05	53123	0.0701747	53123	0.015809	92760	3.48109e+06	42874	0.0145303	84060
	36171	4480.63	79680	25492.2	79680	27870	79680	113541	49876	30905.2	82820	8778.59	82820	130448	39389	8.77361e-08	39389	0	58820	35849	42285	9.83204e-12	60200	17881.4	60200	68504.8	41220	3.24735e-15	41220	1.0503e-13	73980	294110	44537	1.37441e-10	55380	13220	45530	4.36498e-15	56976	1.83122e-05	53143	0.0708159	53143	0.0159755	92780	3.49051e+06	42894	0.0147374	84080
	36191	4524.2	79700	25627.2	79700	28007.4	79700	114135	49896	31283.8	82840	8854.79	82840	131189	39409	9.21797e-08	39409	0	58840	36108.6	42305	1.04235e-11	60220	17968.1	60220	69001.4	41250	3.55977e-15	41250	1.13156e-13	74010	295891	44567	1.47091e-10	55410	13352.3	45550	4.65229e-15	56996	1.86017e-05	53163	0.0714624	53163	0.0161435	92800	3.49995e+06	42914	0.0149471	84100
	36211	4568.15	79720	25762.9	79720	28145.4	79720	114732	49916	31666.6	82860	8931.61	82860	131935	39429	9.68339e-08	39429	0	58860	36369.9	42325	1.10482e-11	60240	18055.1	60240	69501.3	41280	3.90032e-15	41280	1.21874e-13	74040	297681	44597	1.57376e-10	55440	13485.8	45570	4.95735e-15	57016	1.88955e-05	53183	0.0721143	53183	0.0163133	92820	3.50941e+06	42934	0.0151597	84120
	36231	4612.48	79740	25899.2	79740	28284	79740	115332	49936	32053.7	82880	9009.06	82880	132684	39449	1.01708e-07	39449	0	58880	36632.9	42345	1.17078e-11	60260	18142.6	60260	70004.6	41310	4.27137e-15	41310	1.31224e-13	74070	299481	44627	1.68335e-10	55470	13620.4	45590	5.28118e-15	57036	1.91937e-05	53203	0.0727717	53203	0.0164846	92840	3.5189e+06	42954	0.015375	84140
	36251	4657.18	79760	26036.1	79760	28423.2	79760	115935	49956	32445.2	82900	9087.13	82900	133437	39469	1.06806e-07	39469	0	58900	36897.5	42365	1.24041e-11	60280	18230.3	60280	70511.1	41340	4.67548e-15	41340	1.41249e-13	74100	301291	44657	1.8001e-10	55500	13756.3	45610	5.62486e-15	57056	1.94964e-05	53223	0.0734347	53223	0.0166577	92860	3.52841e+06	42974	0.0155932	84160
	36271	4702.27	79780	26173.7	79780	28563	79780	116540	49976	32841.1	82920	9165.83	82920	134194	39489	1.1214e-07	39489	0	58920	37163.9	42385	1.31391e-11	60300	18318.5	60300	71020.9	41370	5.1154e-15	41370	1.51995e-13	74130	303110	44687	1.92446e-10	55530	13893.4	45630	5.98954e-15	57076	1.98036e-05	53243	0.0741032	53243	0.0168324	92880	3.53794e+06	42994	0.0158143	84180
	36291	4747.75	79800	26312	79800	28703.5	79800	117148	49996	33241.5	82940	9245.16	82940	134955	39509	1.1772e-07	39509	0	58940	37432	42405	1.39146e-11	60320	18407	60320	71534.1	41400	5.59409e-15	41400	1.6351e-13	74160	304939	44717	2.05687e-10	55560	14031.7	45650	6.37641e-15	57096	2.01153e-05	53263	0.0747773	53263	0.0170089	92900	3.54749e+06	43014	0.0160383	84200
	36311	4793.62	79820	26450.9	79820	28844.6	79820	117759	50016	33646.3	82960	9325.14	82960	135719	39529	1.23556e-07	39529	0	58960	37701.9	42425	1.47329e-11	60340	18495.9	60340	72050.6	41430	6.11476e-15	41430	1.75847e-13	74190	306778	44747	2.19783e-10	55590	14171.3	45670	6.78675e-15	57116	2.04317e-05	53283	0.075457	53283	0.017187	92920	3.55706e+06	43034	0.0162652	84220
	36331	4839.87	79840	26590.4	79840	28986.2	79840	118373	50036	34055.8	82980	9405.76	82980	136488	39549	1.29662e-07	39549	0	58980	37973.5	42445	1.55961e-11	60360	18585.2	60360	72570.5	41460	6.68085e-15	41460	1.8906e-13	74220	308626	44777	2.34787e-10	55620	14312.1	45690	7.22188e-15	57136	2.07528e-05	53303	0.0761424	53303	0.0173669	92940	3.56666e+06	43054	0.0164951	84240
	36351	4886.53	79860	26730.7	79860	29128.5	79860	118990	50056	34469.8	83000	9487.04	83000	137261	39569	1.36044e-07	39569	0	59000	38246.9	42465	1.65064e-11	60380	18674.9	60380	73093.9	41490	7.29605e-15	41490	2.03207e-13	74250	310485	44807	2.50751e-10	55650	14454.1	45710	7.68322e-15	57156	2.10787e-05	53323	0.0768336	53323	0.0175485	92960	3.57628e+06	43074	0.0167281	84260
	36371	4933.58	79880	26871.6	79880	29271.5	79880	119610	50076	34888.5	83020	9568.96	83020	138038	39589	1.42715e-07	39589	0	59020	38522	42485	1.74664e-11	60400	18764.9	60400	73620.6	41520	7.96437e-15	41520	2.18352e-13	74280	312353	44837	2.67734e-10	55680	14597.4	45730	8.17224e-15	57176	2.14094e-05	53343	0.0775306	53343	0.0177319	92980	3.58592e+06	43094	0.0169641	84280
	36391	4981.03	79900	27013.1	79900	29415	79900	120233	50096	35311.8	83040	9651.55	83040	138818	39609	1.49691e-07	39609	0	59040	38798.9	42505	1.84784e-11	60420	18855.3	60420	74150.8	41550	8.69008e-15	41550	2.3456e-13	74310	314231	44867	2.85798e-10	55710	14742	45750	8.69051e-15	57196	2.1745e-05	53363	0.0782333	53363	0.0179171	93000	3.59558e+06	43114	0.0172032	84300
	36411	5028.88	79920	27155.4	79920	29559.2	79920	120858	50116	35740	83060	9734.81	83060	139603	39629	1.56984e-07	39629	0	59060	39077.6	42525	1.95453e-11	60440	18946.1	60440	74684.4	41580	9.47781e-15	41580	2.519e-13	74340	316119	44897	3.05005e-10	55740	14887.8	45770	9.23965e-15	57216	2.20856e-05	53383	0.0789419	53383	0.0181041	93020	3.60527e+06	43134	0.0174454	84320
	36431	5077.14	79940	27298.3	79940	29704	79940	121487	50136	36172.9	83080	9818.73	83080	140392	39649	1.64603e-07	39649	0	59080	39358.1	42545	2.06696e-11	60460	19037.3	60460	75221.6	41610	1.03325e-14	41610	2.70449e-13	74370	318017	44927	3.25425e-10	55770	15035	45790	9.8214e-15	57236	2.24312e-05	53403	0.0796565	53403	0.0182929	93040	3.61498e+06	43154	0.0176908	84340
	36451	5125.82	79960	27441.9	79960	29849.5	79960	122118	50156	36610.6	83100	9903.33	83100	141185	39669	1.72562e-07	39669	0	59100	39640.3	42565	2.18543e-11	60480	19128.8	60480	75762.2	41640	1.12595e-14	41640	2.90284e-13	74400	319925	44957	3.47129e-10	55800	15183.4	45810	1.04376e-14	57256	2.2782e-05	53423	0.0803769	53423	0.0184835	93060	3.62471e+06	43174	0.0179395	84360
	36471	5174.9	79980	27586.1	79980	29995.6	79980	122753	50176	37053.3	83120	9988.6	83120	141982	39689	1.80879e-07	39689	0	59120	39924.4	42585	2.31024e-11	60500	19220.7	60500	76306.4	41670	1.22646e-14	41670	3.11489e-13	74430	321844	44987	3.70191e-10	55830	15333.2	45830	1.10901e-14	57276	2.31379e-05	53443	0.0811034	53443	0.0186759	93080	3.63446e+06	43194	0.0181913	84380
	36491	5224.4	80000	27731.1	80000	30142.3	80000	123390	50196	37500.8	83140	10074.6	83140	142783	39709	1.89567e-07	39709	0	59140	40210.4	42605	2.44171e-11	60520	19313.1	60520	76854.1	41700	1.33538e-14	41700	3.34153e-13	74460	323772	45017	3.94693e-10	55860	15484.2	45850	1.17809e-14	57296	2.34991e-05	53463	0.081836	53463	0.0188702	93100	3.64424e+06	43214	0.0184465	84400
	36511	5274.32	80020	27876.7	80020	30289.7	80020	124030	50216	37953.4	83160	10161.2	83160	143588	39729	1.9864e-07	39729	0	59160	40498.1	42625	2.58017e-11	60540	19405.8	60540	77405.3	41730	1.45338e-14	41730	3.58372e-13	74490	325711	45047	4.20718e-10	55890	15636.6	45870	1.25123e-14	57316	2.38656e-05	53483	0.0825746	53483	0.0190664	93120	3.65404e+06	43234	0.018705	84420
	36531	5324.66	80040	28023.1	80040	30437.7	80040	124674	50236	38411	83180	10248.6	83180	144397	39749	2.08115e-07	39749	0	59180	40787.8	42645	2.72597e-11	60560	19498.9	60560	77960.2	41760	1.58117e-14	41760	3.84244e-13	74520	327660	45077	4.48355e-10	55920	15790.4	45890	1.32863e-14	57336	2.42376e-05	53503	0.0833193	53503	0.0192645	93140	3.66386e+06	43254	0.0189668	84440
	36551	5375.42	80060	28170.1	80060	30586.4	80060	125320	50256	38873.7	83200	10336.6	83200	145210	39769	2.18007e-07	39769	0	59200	41079.2	42665	2.87946e-11	60580	19592.4	60580	78518.6	41790	1.71951e-14	41790	4.11877e-13	74550	329619	45107	4.77698e-10	55950	15945.5	45910	1.41053e-14	57356	2.4615e-05	53523	0.0840703	53523	0.0194645	93160	3.67371e+06	43274	0.0192321	84460
	36571	5426.62	80080	28317.8	80080	30735.7	80080	125969	50276	39341.6	83220	10425.4	83220	146028	39789	2.28337e-07	39789	0	59220	41372.6	42685	3.04103e-11	60600	19686.2	60600	79080.7	41820	1.86922e-14	41820	4.41382e-13	74580	331588	45137	5.08844e-10	55980	16101.9	45930	1.49718e-14	57376	2.4998e-05	53543	0.0848274	53543	0.0196664	93180	3.68357e+06	43294	0.0195008	84480
	36591	5478.24	80100	28466.2	80100	30885.7	80100	126622	50296	39814.6	83240	10514.8	83240	146850	39809	2.3912e-07	39809	0	59240	41667.8	42705	3.21107e-11	60620	19780.5	60620	79646.4	41850	2.03116e-14	41850	4.72879e-13	74610	333568	45167	5.41899e-10	56010	16259.7	45950	1.58884e-14	57396	2.53866e-05	53563	0.0855909	53563	0.0198702	93200	3.69346e+06	43314	0.019773	84500
	36611	5530.3	80120	28615.3	80120	31036.3	80120	127277	50316	40292.9	83260	10605	83260	147676	39829	2.50371e-07	39829	0	59260	41964.9	42725	3.39e-11	60640	19875.2	60640	80215.8	41880	2.20629e-14	41880	5.06495e-13	74640	335558	45197	5.76971e-10	56040	16419	45970	1.68578e-14	57416	2.57809e-05	53583	0.0863606	53583	0.0200761	93220	3.70338e+06	43334	0.0200487	84520
	36631	5582.8	80140	28765.1	80140	31187.6	80140	127936	50336	40776.5	83280	10695.9	83280	148506	39849	2.62111e-07	39849	0	59280	42263.9	42745	3.57825e-11	60660	19970.2	60660	80788.9	41910	2.39559e-14	41910	5.42363e-13	74670	337559	45227	6.14176e-10	56070	16579.6	45990	1.78828e-14	57436	2.6181e-05	53603	0.0871368	53603	0.0202838	93240	3.71331e+06	43354	0.020328	84540
	36651	5635.73	80160	28915.7	80160	31339.5	80160	128597	50356	41265.5	83300	10787.5	83300	149341	39869	2.74363e-07	39869	0	59300	42564.9	42765	3.77628e-11	60680	20065.7	60680	81365.7	41940	2.60016e-14	41940	5.80626e-13	74700	339570	45257	6.53635e-10	56100	16741.6	46010	1.89665e-14	57456	2.6587e-05	53623	0.0879193	53623	0.0204936	93260	3.72327e+06	43374	0.020611	84560
	36671	5689.11	80180	29066.9	80180	31492.2	80180	129262	50376	41759.8	83320	10879.9	83320	150180	39889	2.87147e-07	39889	0	59320	42867.7	42785	3.98455e-11	60700	20161.5	60700	81946.2	41970	2.82114e-14	41970	6.21434e-13	74730	341592	45287	6.95478e-10	56130	16905	46030	2.01119e-14	57476	2.69989e-05	53643	0.0887083	53643	0.0207054	93280	3.73326e+06	43394	0.0208976	84580
	36691	5742.94	80200	29218.8	80200	31645.4	80200	129930	50396	42259.7	83340	10973	83340	151023	39909	3.00481e-07	39909	0	59340	43172.5	42805	4.20356e-11	60720	20257.7	60720	82530.5	42000	3.05977e-14	42000	6.64946e-13	74760	343625	45317	7.39837e-10	56160	17069.8	46050	2.13225e-14	57496	2.74169e-05	53663	0.0895039	53663	0.0209193	93300	3.74326e+06	43414	0.0211879	84600
	36711	5797.22	80220	29371.5	80220	31799.4	80220	130601	50416	42765	83360	11066.8	83360	151870	39929	3.14386e-07	39929	0	59360	43479.2	42825	4.43383e-11	60740	20354.4	60740	83118.5	42030	3.31737e-14	42030	7.1133e-13	74790	345668	45347	7.86856e-10	56190	17236.1	46070	2.26016e-14	57516	2.7841e-05	53683	0.090306	53683	0.0211352	93320	3.75329e+06	43434	0.0214819	84620
	36731	5851.95	80240	29524.9	80240	31954	80240	131275	50436	43276	83380	11161.4	83380	152722	39949	3.2889e-07	39949	0	59380	43787.9	42845	4.67591e-11	60760	20451.4	60760	83710.4	42060	3.59535e-14	42060	7.60766e-13	74820	347722	45377	8.36684e-10	56220	17403.8	46090	2.3953e-14	57536	2.82712e-05	53703	0.0911147	53703	0.0213531	93340	3.76335e+06	43454	0.0217797	84640
	36751	5907.14	80260	29679	80260	32109.3	80260	131952	50456	43792.5	83400	11256.8	83400	153578	39969	3.44013e-07	39969	0	59400	44098.6	42865	4.93034e-11	60780	20548.9	60780	84306.1	42090	3.89524e-14	42090	8.13441e-13	74850	349786	45407	8.89479e-10	56250	17573	46110	2.53805e-14	57556	2.87078e-05	53723	0.0919301	53723	0.0215731	93360	3.77342e+06	43474	0.0220814	84660
	36771	5962.79	80280	29833.8	80280	32265.2	80280	132632	50476	44314.8	83420	11352.9	83420	154438	39989	3.59779e-07	39989	0	59420	44411.2	42885	5.19773e-11	60800	20646.8	60800	84905.6	42120	4.21864e-14	42120	8.69556e-13	74880	351862	45437	9.45405e-10	56280	17743.7	46130	2.6888e-14	57576	2.91508e-05	53743	0.0927522	53743	0.0217953	93380	3.78352e+06	43494	0.022387	84680
	36791	6018.9	80300	29989.4	80300	32421.9	80300	133315	50496	44842.8	83440	11449.7	83440	155303	40009	3.76212e-07	40009	0	59440	44725.8	42905	5.47868e-11	60820	20745	60820	85509	42150	4.5673e-14	42150	9.29322e-13	74910	353948	45467	1.00464e-09	56310	17915.8	46150	2.84799e-14	57596	2.96002e-05	53763	0.093581	53763	0.0220195	93400	3.79364e+06	43514	0.0226964	84700
	36811	6075.48	80320	30145.7	80320	32579.2	80320	134002	50516	45376.6	83460	11547.4	83460	156172	40029	3.93342e-07	40029	0	59460	45042.4	42925	5.77385e-11	60840	20843.7	60840	86116.2	42180	4.94305e-14	42180	9.92963e-13	74940	356045	45497	1.06736e-09	56340	18089.4	46170	3.01605e-14	57616	3.00561e-05	53783	0.0944167	53783	0.0222459	93420	3.80379e+06	43534	0.0230099	84720
	36831	6132.52	80340	30302.7	80340	32737.2	80340	134692	50536	45916.3	83480	11645.8	83480	157046	40049	4.11197e-07	40049	0	59480	45361	42945	6.0839e-11	60860	20942.8	60860	86727.4	42210	5.34788e-14	42210	1.06071e-12	74970	358153	45527	1.13376e-09	56370	18264.5	46190	3.19345e-14	57636	3.05187e-05	53803	0.0952593	53803	0.0224745	93440	3.81396e+06	43554	0.0233274	84740
	36851	6190.05	80360	30460.4	80360	32895.9	80360	135385	50556	46461.9	83500	11745	83500	157924	40069	4.29804e-07	40069	0	59500	45681.7	42965	6.40953e-11	60880	21042.3	60880	87342.5	42240	5.78389e-14	42240	1.13283e-12	75000	360273	45557	1.20405e-09	56400	18441.2	46210	3.38068e-14	57656	3.09881e-05	53823	0.0961087	53823	0.0227052	93460	3.82415e+06	43574	0.023649	84760
	36871	6248.04	80380	30618.9	80380	33055.2	80380	136081	50576	47013.5	83520	11845	83520	158807	40089	4.49188e-07	40089	0	59520	46004.3	42985	6.75147e-11	60900	21142.2	60900	87961.5	42270	6.25336e-14	42270	1.20956e-12	75030	362403	45587	1.27843e-09	56430	18619.4	46230	3.57825e-14	57676	3.14642e-05	53843	0.0969651	53843	0.0229382	93480	3.83437e+06	43594	0.0239746	84780
	36891	6306.52	80400	30778.2	80400	33215.3	80400	136780	50596	47571.1	83540	11945.7	83540	159694	40109	4.6938e-07	40109	0	59540	46329.1	43005	7.11049e-11	60920	21242.5	60920	88584.6	42300	6.75867e-14	42300	1.2912e-12	75060	364544	45617	1.35714e-09	56460	18799.1	46250	3.7867e-14	57696	3.19473e-05	53863	0.0978286	53863	0.0231733	93500	3.84461e+06	43614	0.0243045	84800
	36911	6365.49	80420	30938.1	80420	33376.1	80420	137483	50616	48134.8	83560	12047.3	83560	160586	40129	4.90416e-07	40129	0	59560	46655.8	43025	7.48739e-11	60940	21343.2	60940	89211.6	42330	7.30241e-14	42330	1.37804e-12	75090	366697	45647	1.44041e-09	56490	18980.3	46270	4.00659e-14	57716	3.24374e-05	53883	0.0986991	53883	0.0234107	93520	3.85487e+06	43634	0.0246386	84820
	36931	6424.94	80440	31098.9	80440	33537.5	80440	138189	50636	48704.7	83580	12149.7	83580	161482	40149	5.12327e-07	40149	0	59580	46984.7	43045	7.88299e-11	60960	21444.3	60960	89842.6	42360	7.88731e-14	42360	1.47039e-12	75120	368860	45677	1.52848e-09	56520	19163.1	46290	4.23851e-14	57736	3.29346e-05	53903	0.0995768	53903	0.0236503	93540	3.86516e+06	43654	0.0249769	84840
	36951	6484.88	80460	31260.3	80460	33699.7	80460	138898	50656	49280.9	83600	12252.9	83600	162383	40169	5.35144e-07	40169	0	59600	47315.6	43065	8.29816e-11	60980	21545.9	60980	90477.7	42390	8.51631e-14	42390	1.56858e-12	75150	371035	45707	1.62161e-09	56550	19347.5	46310	4.48309e-14	57756	3.3439e-05	53923	0.100462	53923	0.0238923	93560	3.87547e+06	43674	0.0253196	84860
	36971	6545.31	80480	31422.6	80480	33862.5	80480	139610	50676	49863.3	83620	12356.9	83620	163288	40189	5.58902e-07	40189	0	59620	47648.6	43085	8.73381e-11	61000	21647.9	61000	91116.9	42420	9.19253e-14	42420	1.67296e-12	75180	373222	45737	1.72009e-09	56580	19533.5	46330	4.74096e-14	57776	3.39507e-05	53943	0.101354	53943	0.0241365	93580	3.8858e+06	43694	0.0256666	84880
	36991	6606.24	80500	31585.6	80500	34026.1	80500	140326	50696	50452	83640	12461.7	83640	164198	40209	5.83639e-07	40209	0	59640	47983.7	43105	9.19088e-11	61020	21750.3	61020	91760.1	42450	9.9193e-14	42450	1.78389e-12	75210	375419	45767	1.82419e-09	56610	19721.1	46350	5.01282e-14	57796	3.44698e-05	53963	0.102253	53963	0.024383	93600	3.89616e+06	43714	0.026018	84900
	37011	6667.68	80520	31749.3	80520	34190.4	80520	141045	50716	51047.2	83660	12567.4	83660	165112	40229	6.09392e-07	40229	0	59660	48320.9	43125	9.67035e-11	61040	21853.1	61040	92407.5	42480	1.07002e-13	42480	1.90177e-12	75240	377628	45797	1.93421e-09	56640	19910.2	46370	5.29936e-14	57816	3.49964e-05	53983	0.10316	53983	0.0246319	93620	3.90654e+06	43734	0.0263739	84920
	37031	6729.61	80540	31913.9	80540	34355.3	80540	141767	50736	51648.9	83680	12673.9	83680	166032	40249	6.362e-07	40249	0	59680	48660.3	43145	1.01733e-10	61060	21956.3	61060	93059	42510	1.15389e-13	42510	2.02699e-12	75270	379849	45827	2.05048e-09	56670	20101	46390	5.60135e-14	57836	3.55306e-05	54003	0.104074	54003	0.0248831	93640	3.91695e+06	43754	0.0267344	84940
	37051	6792.06	80560	32079.1	80560	34521	80560	142493	50756	52257.1	83700	12781.2	83700	166955	40269	6.64097e-07	40269	0	59700	49001.8	43165	1.07007e-10	61080	22060	61080	93714.7	42540	1.24396e-13	42540	2.16e-12	75300	382081	45857	2.17333e-09	56700	20293.5	46410	5.91957e-14	57856	3.60725e-05	54023	0.104995	54023	0.0251367	93660	3.92738e+06	43774	0.0270994	84960
	37071	6855.02	80580	32245.2	80580	34687.4	80580	143222	50776	52871.9	83720	12889.4	83720	167884	40289	6.93128e-07	40289	0	59720	49345.4	43185	1.12537e-10	61100	22164.1	61100	94374.5	42570	1.34064e-13	42570	2.30125e-12	75330	384324	45887	2.3031e-09	56730	20487.5	46430	6.25483e-14	57876	3.66223e-05	54043	0.105924	54043	0.0253927	93680	3.93783e+06	43794	0.0274691	84980
	37091	6918.49	80600	32412	80600	34854.6	80600	143954	50796	53493.3	83740	12998.5	83740	168817	40309	7.23339e-07	40309	0	59740	49691.2	43205	1.18335e-10	61120	22268.6	61120	95038.6	42600	1.44441e-13	42600	2.45121e-12	75360	386579	45917	2.44016e-09	56760	20683.3	46450	6.60799e-14	57896	3.71799e-05	54063	0.106861	54063	0.0256511	93700	3.94831e+06	43814	0.0278434	85000
	37111	6982.49	80620	32579.6	80620	35022.4	80620	144690	50816	54121.6	83760	13108.4	83760	169755	40329	7.54772e-07	40329	0	59760	50039.2	43225	1.24413e-10	61140	22373.6	61140	95706.9	42630	1.55574e-13	42630	2.6104e-12	75390	388846	45947	2.5849e-09	56790	20880.7	46470	6.97996e-14	57916	3.77456e-05	54083	0.107805	54083	0.0259119	93720	3.95881e+06	43834	0.0282225	85020
	37131	7047	80640	32748	80640	35191	80640	145429	50836	54756.6	83780	13219.1	83780	170698	40349	7.87472e-07	40349	0	59780	50389.3	43245	1.30783e-10	61160	22479	61160	96379.4	42660	1.67515e-13	42660	2.77935e-12	75420	391125	45977	2.73771e-09	56820	21079.7	46490	7.37168e-14	57936	3.83194e-05	54103	0.108757	54103	0.0261753	93740	3.96934e+06	43854	0.0286064	85040
	37151	7112.04	80660	32917.2	80660	35360.3	80660	146172	50856	55398.5	83800	13330.8	83800	171645	40369	8.21485e-07	40369	0	59800	50741.7	43265	1.3746e-10	61180	22584.8	61180	97056.3	42690	1.8032e-13	42690	2.95862e-12	75450	393415	46007	2.89903e-09	56850	21280.5	46510	7.78413e-14	57956	3.89015e-05	54123	0.109717	54123	0.0264411	93760	3.97989e+06	43874	0.0289951	85060
	37171	7177.62	80680	33087.2	80680	35530.3	80680	146918	50876	56047.3	83820	13443.3	83820	172598	40389	8.56861e-07	40389	0	59820	51096.2	43285	1.44455e-10	61200	22691	61200	97737.4	42720	1.94047e-13	42720	3.14881e-12	75480	395717	46037	3.0693e-09	56880	21483	46530	8.21835e-14	57976	3.94919e-05	54143	0.110684	54143	0.0267093	93780	3.99047e+06	43894	0.0293887	85080
	37191	7243.72	80700	33257.9	80700	35701	80700	147667	50896	56703.2	83840	13556.7	83840	173555	40409	8.9365e-07	40409	0	59840	51453	43305	1.51785e-10	61220	22797.7	61220	98422.9	42750	2.08759e-13	42750	3.35054e-12	75510	398031	46067	3.24897e-09	56910	21687.2	46550	8.67542e-14	57996	4.00908e-05	54163	0.11166	54163	0.0269802	93800	4.00107e+06	43914	0.0297873	85100
	37211	7310.37	80720	33429.5	80720	35872.5	80720	148420	50916	57366.1	83860	13671	83860	174517	40429	9.31905e-07	40429	0	59860	51812	43325	1.59463e-10	61240	22904.8	61240	99112.7	42780	2.24523e-13	42780	3.56448e-12	75540	400357	46097	3.43855e-09	56940	21893.1	46570	9.15648e-14	58016	4.06983e-05	54183	0.112643	54183	0.0272535	93820	4.01169e+06	43934	0.0301909	85120
	37231	7377.55	80740	33601.8	80740	36044.7	80740	149176	50936	58036.2	83880	13786.2	83880	175483	40449	9.71679e-07	40449	0	59880	52173.3	43345	1.67505e-10	61260	23012.4	61260	99806.9	42810	2.41408e-13	42810	3.79132e-12	75570	402695	46127	3.63854e-09	56970	22100.8	46590	9.66269e-14	58036	4.13144e-05	54203	0.113634	54203	0.0275295	93840	4.02234e+06	43954	0.0305997	85140
	37251	7445.29	80760	33774.9	80760	36217.7	80760	149936	50956	58713.5	83900	13902.3	83900	176455	40469	1.01303e-06	40469	0	59900	52536.8	43365	1.75927e-10	61280	23120.4	61280	100505	42840	2.59489e-13	42840	4.03179e-12	75600	405045	46157	3.84948e-09	57000	22310.3	46610	1.01953e-13	58056	4.19394e-05	54223	0.114633	54223	0.027808	93860	4.03301e+06	43974	0.0310135	85160
	37271	7513.57	80780	33948.9	80780	36391.4	80780	150699	50976	59398.1	83920	14019.3	83920	177432	40489	1.05601e-06	40489	0	59920	52902.6	43385	1.84747e-10	61300	23228.8	61300	101209	42870	2.78848e-13	42870	4.28666e-12	75630	407407	46187	4.07193e-09	57030	22521.5	46630	1.07557e-13	58076	4.25734e-05	54243	0.11564	54243	0.0280891	93880	4.04371e+06	43994	0.0314326	85180
	37291	7582.4	80800	34123.6	80800	36565.9	80800	151466	50996	60090	83940	14137.2	83940	178413	40509	1.10069e-06	40509	0	59940	53270.7	43405	1.93981e-10	61320	23337.7	61320	101916	42900	2.99568e-13	42900	4.55674e-12	75660	409781	46217	4.30648e-09	57060	22734.5	46650	1.1345e-13	58096	4.32164e-05	54263	0.116656	54263	0.0283729	93900	4.05443e+06	44014	0.0318569	85200
	37311	7651.79	80820	34299.2	80820	36741.1	80820	152236	51016	60789.4	83960	14256.1	83960	179400	40529	1.14712e-06	40529	0	59960	53641	43425	2.03648e-10	61340	23447	61340	102628	42930	3.21739e-13	42930	4.8429e-12	75690	412168	46247	4.55375e-09	57090	22949.3	46670	1.19649e-13	58116	4.38685e-05	54283	0.117679	54283	0.0286593	93920	4.06517e+06	44034	0.0322865	85220
	37331	7721.74	80840	34475.6	80840	36917	80840	153010	51036	61496.3	83980	14375.9	83980	180391	40549	1.19537e-06	40549	0	59980	54013.7	43445	2.13767e-10	61360	23556.8	61360	103344	42960	3.45458e-13	42960	5.14603e-12	75720	414566	46277	4.81439e-09	57120	23165.9	46690	1.26168e-13	58136	4.453e-05	54303	0.118711	54303	0.0289485	93940	4.07594e+06	44054	0.0327215	85240
	37351	7792.26	80860	34652.7	80860	37093.7	80860	153787	51056	62210.8	84000	14496.6	84000	181387	40569	1.2455e-06	40569	0	60000	54388.7	43465	2.24358e-10	61380	23667	61380	104065	42990	3.70826e-13	42990	5.46709e-12	75750	416977	46307	5.08907e-09	57150	23384.3	46710	1.33021e-13	58156	4.52009e-05	54323	0.119751	54323	0.0292403	93960	4.08674e+06	44074	0.033162	85260
	37371	7863.34	80880	34830.8	80880	37271.2	80880	154568	51076	62932.9	84020	14618.3	84020	182389	40589	1.29758e-06	40589	0	60020	54766	43485	2.3544e-10	61400	23777.7	61400	104791	43020	3.9795e-13	43020	5.80706e-12	75780	419401	46337	5.37851e-09	57180	23604.5	46730	1.40227e-13	58176	4.58814e-05	54343	0.1208	54343	0.0295348	93980	4.09756e+06	44094	0.033608	85280
	37391	7935	80900	35009.6	80900	37449.4	80900	155352	51096	63662.8	84040	14740.9	84040	183395	40609	1.35169e-06	40609	0	60040	55145.7	43505	2.47037e-10	61420	23888.8	61420	105521	43050	4.26946e-13	43050	6.167e-12	75810	421836	46367	5.68345e-09	57210	23826.7	46750	1.478e-13	58196	4.65715e-05	54363	0.121857	54363	0.0298321	94000	4.1084e+06	44114	0.0340595	85300
	37411	8007.23	80920	35189.2	80920	37628.4	80920	156140	51116	64400.4	84060	14864.5	84060	184407	40629	1.40789e-06	40629	0	60060	55527.7	43525	2.59169e-10	61440	24000.4	61440	106256	43080	4.57934e-13	43080	6.54802e-12	75840	424284	46397	6.00468e-09	57240	24050.6	46770	1.5576e-13	58216	4.72714e-05	54383	0.122922	54383	0.0301322	94020	4.11927e+06	44134	0.0345167	85320
	37431	8080.04	80940	35369.7	80940	37808.1	80940	156932	51136	65146	84080	14989	84080	185423	40649	1.46626e-06	40649	0	60080	55912.1	43545	2.7186e-10	61460	24112.4	61460	106995	43110	4.91043e-13	43110	6.95128e-12	75870	426745	46427	6.34299e-09	57270	24276.5	46790	1.64124e-13	58236	4.79813e-05	54403	0.123996	54403	0.0304351	94040	4.13017e+06	44154	0.0349796	85340
	37451	8153.44	80960	35551	80960	37988.6	80960	157727	51156	65899.5	84100	15114.5	84100	186445	40669	1.52688e-06	40669	0	60100	56298.9	43565	2.85134e-10	61480	24224.9	61480	107739	43140	5.26411e-13	43140	7.378e-12	75900	429218	46457	6.69926e-09	57300	24504.2	46810	1.72913e-13	58256	4.87013e-05	54423	0.125079	54423	0.0307408	94060	4.14108e+06	44174	0.0354482	85360
	37471	8227.43	80980	35733.2	80980	38169.9	80980	158526	51176	66661.1	84120	15241	84120	187472	40689	1.58983e-06	40689	0	60120	56688.1	43585	2.99016e-10	61500	24337.8	61500	108488	43170	5.64182e-13	43170	7.82946e-12	75930	431704	46487	7.07437e-09	57330	24733.9	46830	1.82146e-13	58276	4.94315e-05	54443	0.126171	54443	0.0310493	94080	4.15203e+06	44194	0.0359227	85380
	37491	8302.01	81000	35916.2	81000	38352	81000	159329	51196	67430.8	84140	15368.5	84140	188504	40709	1.65518e-06	40709	0	60140	57079.7	43605	3.13533e-10	61520	24451.2	61520	109241	43200	6.0451e-13	43200	8.30703e-12	75960	434203	46517	7.46927e-09	57360	24965.5	46850	1.91845e-13	58296	5.0172e-05	54463	0.127271	54463	0.0313607	94100	4.163e+06	44214	0.0364031	85400
	37511	8377.18	81020	36100	81020	38534.8	81020	160135	51216	68208.6	84160	15497	84160	189541	40729	1.72303e-06	40729	0	60160	57473.7	43625	3.28711e-10	61540	24565.1	61540	110000	43230	6.47558e-13	43230	8.81212e-12	75990	436714	46547	7.88492e-09	57390	25199	46870	2.02032e-13	58316	5.0923e-05	54483	0.12838	54483	0.031675	94120	4.17399e+06	44234	0.0368895	85420
	37531	8452.96	81040	36284.7	81040	38718.4	81040	160944	51236	68994.8	84180	15626.5	84180	190583	40749	1.79347e-06	40749	0	60180	57870.2	43645	3.44579e-10	61560	24679.4	61560	110763	43260	6.93498e-13	43260	9.34623e-12	76020	439238	46577	8.32236e-09	57420	25434.4	46890	2.12729e-13	58336	5.16846e-05	54503	0.129497	54503	0.0319923	94140	4.18501e+06	44254	0.0373819	85440
	37551	8529.34	81060	36470.3	81060	38902.8	81060	161758	51256	69789.3	84200	15757	84200	191631	40769	1.86658e-06	40769	0	60200	58269.1	43665	3.61166e-10	61580	24794.2	61580	111530	43290	7.42514e-13	43290	9.91093e-12	76050	441775	46607	8.78266e-09	57450	25671.8	46910	2.23962e-13	58356	5.2457e-05	54523	0.130624	54523	0.0323124	94160	4.19605e+06	44274	0.0378804	85460
	37571	8606.33	81080	36656.7	81080	39088	81080	162575	51276	70592.2	84220	15888.5	84220	192683	40789	1.94246e-06	40789	0	60220	58670.4	43685	3.78502e-10	61600	24909.4	61600	112303	43320	7.948e-13	43320	1.05079e-11	76080	444325	46637	9.26694e-09	57480	25911.2	46930	2.35754e-13	58376	5.32403e-05	54543	0.13176	54543	0.0326356	94180	4.20712e+06	44294	0.038385	85480
	37591	8683.94	81100	36843.9	81100	39274	81100	163396	51296	71403.7	84240	16021	84240	193742	40809	2.0212e-06	40809	0	60240	59074.3	43705	3.96619e-10	61620	25025.1	61620	113080	43350	8.5056e-13	43350	1.11388e-11	76110	446888	46667	9.77637e-09	57510	26152.6	46950	2.48134e-13	58396	5.40347e-05	54563	0.132905	54563	0.0329617	94200	4.21822e+06	44314	0.038896	85500
	37611	8762.16	81120	37032	81120	39460.7	81120	164221	51316	72223.7	84260	16154.6	84260	194805	40829	2.10291e-06	40829	0	60260	59480.6	43725	4.15551e-10	61640	25141.3	61640	113862	43380	9.10012e-13	43380	1.18055e-11	76140	449464	46697	1.03122e-08	57540	26396	46970	2.61127e-13	58416	5.48402e-05	54583	0.134059	54583	0.0332909	94220	4.22934e+06	44334	0.0394132	85520
	37631	8841	81140	37221	81140	39648.3	81140	165049	51336	73052.5	84280	16289.2	84280	195874	40849	2.18769e-06	40849	0	60280	59889.5	43745	4.35331e-10	61660	25257.9	61660	114650	43410	9.73387e-13	43410	1.25099e-11	76170	452052	46727	1.08757e-08	57570	26641.4	46990	2.74764e-13	58436	5.56572e-05	54603	0.135222	54603	0.0336231	94240	4.24048e+06	44354	0.0399368	85540
	37651	8920.47	81160	37410.8	81160	39836.6	81160	165881	51356	73890	84300	16424.8	84300	196948	40869	2.27564e-06	40869	0	60300	60300.8	43765	4.55995e-10	61680	25375.1	61680	115442	43440	1.04093e-12	43440	1.32541e-11	76200	454655	46757	1.14681e-08	57600	26888.9	47010	2.89073e-13	58456	5.64856e-05	54623	0.136395	54623	0.0339584	94260	4.25165e+06	44374	0.0404669	85560
	37671	9000.57	81180	37601.5	81180	40025.8	81180	166717	51376	74736.3	84320	16561.5	84320	198027	40889	2.36688e-06	40889	0	60320	60714.7	43785	4.7758e-10	61700	25492.6	61700	116239	43470	1.11289e-12	43470	1.404e-11	76230	457270	46787	1.2091e-08	57630	27138.4	47030	3.04087e-13	58476	5.73256e-05	54643	0.137577	54643	0.0342968	94280	4.26285e+06	44394	0.0410035	85580
	37691	9081.31	81200	37793.1	81200	40215.8	81200	167557	51396	75591.6	84340	16699.2	84340	199112	40909	2.46152e-06	40909	0	60340	61131.1	43805	5.00125e-10	61720	25610.7	61720	117041	43500	1.18956e-12	43500	1.48701e-11	76260	459898	46817	1.27458e-08	57660	27389.9	47050	3.19837e-13	58496	5.81775e-05	54663	0.138768	54663	0.0346383	94300	4.27407e+06	44414	0.0415468	85600
	37711	9162.68	81220	37985.6	81220	40406.5	81220	168400	51416	76456	84360	16838.1	84360	200202	40929	2.55968e-06	40929	0	60360	61550.1	43825	5.23669e-10	61740	25729.2	61740	117848	43530	1.27121e-12	43530	1.57465e-11	76290	462540	46847	1.3434e-08	57690	27643.6	47070	3.36359e-13	58516	5.90413e-05	54683	0.139969	54683	0.0349829	94320	4.28532e+06	44434	0.0420967	85620
	37731	9244.7	81240	38178.9	81240	40598.1	81240	169248	51436	77329.4	84380	16978	84380	201297	40949	2.66148e-06	40949	0	60380	61971.7	43845	5.48254e-10	61760	25848.3	61760	118660	43560	1.35815e-12	43560	1.66717e-11	76320	465195	46877	1.41571e-08	57720	27899.3	47090	3.53687e-13	58536	5.99173e-05	54703	0.141179	54703	0.0353308	94340	4.29659e+06	44454	0.0426534	85640
	37751	9327.36	81260	38373.1	81260	40790.5	81260	170099	51456	78212	84400	17118.9	84400	202399	40969	2.76703e-06	40969	0	60400	62395.8	43865	5.73923e-10	61780	25967.7	61780	119477	43590	1.4507e-12	43590	1.76484e-11	76350	467864	46907	1.4917e-08	57750	28157.1	47110	3.71859e-13	58556	6.08055e-05	54723	0.142399	54723	0.0356818	94360	4.30789e+06	44474	0.0432169	85660
	37771	9410.68	81280	38568.3	81280	40983.7	81280	170954	51476	79104	84420	17261	84420	203505	40989	2.87648e-06	40989	0	60420	62822.6	43885	6.00721e-10	61800	26087.7	61800	120299	43620	1.54921e-12	43620	1.86791e-11	76380	470546	46937	1.57153e-08	57780	28417.1	47130	3.90913e-13	58576	6.17062e-05	54743	0.143629	54743	0.0360361	94380	4.31921e+06	44494	0.0437873	85680
	37791	9494.65	81300	38764.3	81300	41177.7	81300	171813	51496	80005.3	84440	17404.2	84440	204617	41009	2.98995e-06	41009	0	60440	63252	43905	6.28694e-10	61820	26208.2	61820	121126	43650	1.65404e-12	43650	1.97667e-11	76410	473241	46967	1.65538e-08	57810	28679.2	47150	4.1089e-13	58596	6.26195e-05	54763	0.144868	54763	0.0363936	94400	4.33056e+06	44514	0.0443647	85700
	37811	9579.28	81320	38961.2	81320	41372.5	81320	172675	51516	80916.1	84460	17548.4	84460	205735	41029	3.10758e-06	41029	0	60460	63684	43925	6.57891e-10	61840	26329.1	61840	121959	43680	1.76557e-12	43680	2.09142e-11	76440	475951	46997	1.74345e-08	57840	28943.5	47170	4.31833e-13	58616	6.35456e-05	54783	0.146118	54783	0.0367545	94420	4.34194e+06	44534	0.0449492	85720
	37831	9664.58	81340	39159	81340	41568.2	81340	173542	51536	81836.4	84480	17693.8	84480	206858	41049	3.22952e-06	41049	0	60480	64118.6	43945	6.88362e-10	61860	26450.5	61860	122797	43710	1.8842e-12	43710	2.21246e-11	76470	478673	47027	1.83594e-08	57870	29209.9	47190	4.53785e-13	58636	6.44846e-05	54803	0.147377	54803	0.0371186	94440	4.35334e+06	44554	0.0455409	85740
	37851	9750.55	81360	39357.7	81360	41764.7	81360	174413	51556	82766.4	84500	17840.3	84500	207987	41069	3.3559e-06	41069	0	60500	64555.9	43965	7.20158e-10	61880	26572.5	61880	123640	43740	2.01036e-12	43740	2.34013e-11	76500	481410	47057	1.93305e-08	57900	29478.5	47210	4.76792e-13	58656	6.54367e-05	54823	0.148646	54823	0.0374861	94460	4.36476e+06	44574	0.0461398	85760
	37871	9837.2	81380	39557.3	81380	41962	81380	175287	51576	83706.1	84520	17988	84520	209121	41089	3.48688e-06	41089	0	60520	64995.9	43985	7.53335e-10	61900	26694.9	61900	124488	43770	2.1445e-12	43770	2.47476e-11	76530	484160	47087	2.035e-08	57930	29749.3	47230	5.00902e-13	58676	6.64021e-05	54843	0.149925	54843	0.037857	94480	4.37622e+06	44594	0.046746	85780
	37891	9924.52	81400	39757.9	81400	42160.1	81400	176166	51596	84655.7	84540	18136.8	84540	210261	41109	3.62262e-06	41109	0	60540	65438.5	44005	7.87948e-10	61920	26817.7	61920	125341	43800	2.2871e-12	43800	2.61672e-11	76560	486924	47117	2.14201e-08	57960	30022.4	47250	5.26165e-13	58696	6.73809e-05	54863	0.151214	54863	0.0382312	94500	4.38769e+06	44614	0.0473595	85800
	37911	10012.5	81420	39959.3	81420	42359.1	81420	177048	51616	85615.2	84560	18286.7	84560	211406	41129	3.76326e-06	41129	0	60560	65883.8	44025	8.24055e-10	61940	26941.1	61940	126200	43830	2.43865e-12	43830	2.76638e-11	76590	489702	47147	2.25433e-08	57990	30297.6	47270	5.52632e-13	58716	6.83734e-05	54883	0.152514	54883	0.0386089	94520	4.3992e+06	44634	0.0479806	85820
	37931	10101.2	81440	40161.7	81440	42559	81440	177934	51636	86584.7	84580	18437.8	84580	212558	41149	3.90899e-06	41149	0	60580	66331.9	44045	8.61717e-10	61960	27065	61960	127064	43860	2.59969e-12	43860	2.92412e-11	76620	492494	47177	2.3722e-08	58020	30575.1	47290	5.80359e-13	58736	6.93797e-05	54903	0.153824	54903	0.03899	94540	4.41073e+06	44654	0.0486093	85840
	37951	10190.6	81460	40364.9	81460	42759.6	81460	178825	51656	87564.3	84600	18590	84600	213715	41169	4.05996e-06	41169	0	60600	66782.7	44065	9.00997e-10	61980	27189.4	61980	127933	43890	2.77078e-12	43890	3.09038e-11	76650	495300	47207	2.49588e-08	58050	30854.9	47310	6.09401e-13	58756	7.04e-05	54923	0.155144	54923	0.0393747	94560	4.42229e+06	44674	0.0492455	85860
	37971	10280.7	81480	40569.2	81480	42961.1	81480	179719	51676	88554.2	84620	18743.4	84620	214878	41189	4.21635e-06	41189	0	60620	67236.2	44085	9.41959e-10	62000	27314.2	62000	128808	43920	2.9525e-12	43920	3.26557e-11	76680	498121	47237	2.62564e-08	58080	31137	47330	6.39818e-13	58776	7.14345e-05	54943	0.156474	54943	0.0397628	94580	4.43387e+06	44694	0.0498896	85880
	37991	10371.5	81500	40774.3	81500	43163.5	81500	180617	51696	89554.4	84640	18898	84640	216046	41209	4.37835e-06	41209	0	60640	67692.5	44105	9.84672e-10	62020	27439.6	62020	129688	43950	3.14549e-12	43950	3.45015e-11	76710	500955	47267	2.76175e-08	58110	31421.4	47350	6.71671e-13	58796	7.24833e-05	54963	0.157815	54963	0.0401545	94600	4.44548e+06	44714	0.0505414	85900
	38011	10463	81520	40980.4	81520	43366.7	81520	181520	51716	90564.9	84660	19053.8	84660	217220	41229	4.54614e-06	41229	0	60660	68151.6	44125	1.0292e-09	62040	27565.5	62040	130574	43980	3.3504e-12	43980	3.6446e-11	76740	503803	47297	2.90452e-08	58140	31708	47370	7.05024e-13	58816	7.35467e-05	54983	0.159167	54983	0.0405498	94620	4.45711e+06	44734	0.0512012	85920
	38031	10555.2	81540	41187.4	81540	43570.8	81540	182426	51736	91586	84680	19210.8	84680	218400	41249	4.7199e-06	41249	0	60680	68613.4	44145	1.07563e-09	62060	27691.8	62060	131465	44010	3.56792e-12	44010	3.84941e-11	76770	506666	47327	3.05424e-08	58170	31997	47390	7.39944e-13	58836	7.46248e-05	55003	0.160529	55003	0.0409487	94640	4.46877e+06	44754	0.0518689	85940
	38051	10648.1	81560	41395.3	81560	43775.7	81560	183337	51756	92617.7	84700	19369	84700	219586	41269	4.89984e-06	41269	0	60700	69078.1	44165	1.12403e-09	62080	27818.7	62080	132361	44040	3.79879e-12	44040	4.0651e-11	76800	509543	47357	3.21124e-08	58200	32288.4	47410	7.765e-13	58856	7.57179e-05	55023	0.161902	55023	0.0413512	94660	4.48046e+06	44774	0.0525447	85960
	38071	10741.8	81580	41604.2	81580	43981.5	81580	184252	51776	93660.2	84720	19528.4	84720	220778	41289	5.08617e-06	41289	0	60720	69545.6	44185	1.17447e-09	62100	27946.1	62100	133263	44070	4.04377e-12	44070	4.29223e-11	76830	512434	47387	3.37584e-08	58230	32582.1	47430	8.14765e-13	58876	7.68261e-05	55043	0.163286	55043	0.0417574	94680	4.49218e+06	44794	0.0532288	85980
	38091	10836.1	81600	41814	81600	44188.2	81600	185170	51796	94713.4	84740	19689	84740	221976	41309	5.27908e-06	41309	0	60740	70015.9	44205	1.22704e-09	62120	28074	62120	134171	44100	4.30369e-12	44100	4.53135e-11	76860	515340	47417	3.5484e-08	58260	32878.2	47450	8.54813e-13	58896	7.79496e-05	55063	0.16468	55063	0.0421673	94700	4.50392e+06	44814	0.053921	86000
	38111	10931.2	81620	42024.8	81620	44395.7	81620	186093	51816	95777.5	84760	19850.9	84760	223179	41329	5.4788e-06	41329	0	60760	70489	44225	1.28182e-09	62140	28202.4	62140	135084	44130	4.5794e-12	44130	4.78308e-11	76890	518260	47447	3.72927e-08	58290	33176.7	47470	8.96725e-13	58916	7.90886e-05	55083	0.166086	55083	0.0425809	94720	4.51568e+06	44834	0.0546217	86020
	38131	11027.1	81640	42236.6	81640	44604.1	81640	187020	51836	96852.7	84780	20014	84780	224389	41349	5.68555e-06	41349	0	60780	70965	44245	1.3389e-09	62160	28331.3	62160	136003	44160	4.87181e-12	44160	5.04802e-11	76920	521195	47477	3.91883e-08	58320	33477.6	47490	9.4058e-13	58936	8.02434e-05	55103	0.167502	55103	0.0429982	94740	4.52748e+06	44854	0.0553308	86040
	38151	11123.6	81660	42449.3	81660	44813.4	81660	187951	51856	97939	84800	20178.3	84800	225605	41369	5.89956e-06	41369	0	60800	71443.9	44265	1.39837e-09	62180	28460.7	62180	136928	44190	5.18186e-12	44190	5.32685e-11	76950	524145	47507	4.11748e-08	58350	33780.9	47510	9.86465e-13	58956	8.14141e-05	55123	0.16893	55123	0.0434194	94760	4.5393e+06	44874	0.0560484	86060
	38171	11221	81680	42663	81680	45023.5	81680	188887	51876	99036.5	84820	20343.9	84820	226826	41389	6.12107e-06	41389	0	60820	71925.7	44285	1.46033e-09	62200	28590.6	62200	137858	44220	5.51057e-12	44220	5.62025e-11	76980	527109	47537	4.32561e-08	58380	34086.7	47530	1.03447e-12	58976	8.26009e-05	55143	0.170369	55143	0.0438444	94780	4.55115e+06	44894	0.0567747	86080
	38191	11319	81700	42877.6	81700	45234.5	81700	189826	51896	100145	84840	20510.8	84840	228054	41409	6.35031e-06	41409	0	60840	72410.4	44305	1.52486e-09	62220	28721.1	62220	138794	44250	5.85899e-12	44250	5.92893e-11	77010	530088	47567	4.54367e-08	58410	34395	47550	1.08468e-12	58996	8.38041e-05	55163	0.171819	55163	0.0442732	94800	4.56302e+06	44914	0.0575097	86100
	38211	11417.9	81720	43093.2	81720	45446.5	81720	190770	51916	101266	84860	20678.9	84860	229287	41429	6.58753e-06	41429	0	60860	72898	44325	1.59208e-09	62240	28852	62240	139736	44280	6.22824e-12	44280	6.25365e-11	77040	533082	47597	4.77209e-08	58440	34705.7	47570	1.1372e-12	59016	8.50238e-05	55183	0.17328	55183	0.0447059	94820	4.57492e+06	44934	0.0582536	86120
	38231	11517.5	81740	43309.8	81740	45659.3	81740	191718	51936	102398	84880	20848.3	84880	230527	41449	6.83301e-06	41449	0	60880	73388.6	44345	1.66209e-09	62260	28983.5	62260	140683	44310	6.61949e-12	44310	6.59518e-11	77070	536090	47627	5.01134e-08	58470	35018.9	47590	1.19213e-12	59036	8.62603e-05	55203	0.174753	55203	0.0451426	94840	4.58685e+06	44954	0.0590064	86140
	38251	11617.8	81760	43527.4	81760	45872.9	81760	192670	51956	103541	84900	21019.1	84900	231773	41469	7.08699e-06	41469	0	60900	73882.1	44365	1.73499e-09	62280	29115.5	62280	141636	44340	7.03397e-12	44340	6.95436e-11	77100	539114	47657	5.2619e-08	58500	35334.7	47610	1.24957e-12	59056	8.75138e-05	55223	0.176238	55223	0.0455832	94860	4.5988e+06	44974	0.0597682	86160
	38271	11718.9	81780	43745.9	81780	46087.5	81780	193627	51976	104696	84920	21191.1	84920	233024	41489	7.34976e-06	41489	0	60920	74378.6	44385	1.8109e-09	62300	29248	62300	142595	44370	7.473e-12	44370	7.33205e-11	77130	542152	47687	5.52427e-08	58530	35653	47630	1.30963e-12	59076	8.87845e-05	55243	0.177734	55243	0.0460278	94880	4.61078e+06	44994	0.0605391	86180
	38291	11820.8	81800	43965.4	81800	46303	81800	194587	51996	105863	84940	21364.4	84940	234282	41509	7.6216e-06	41509	0	60940	74878	44405	1.88993e-09	62320	29381.1	62320	143560	44400	7.93793e-12	44400	7.72913e-11	77160	545206	47717	5.79897e-08	58560	35973.8	47650	1.37242e-12	59096	9.00727e-05	55263	0.179241	55263	0.0464764	94900	4.62279e+06	45014	0.0613193	86200
	38311	11923.5	81820	44185.9	81820	46519.4	81820	195552	52016	107043	84960	21539.1	84960	235547	41529	7.90279e-06	41529	0	60960	75380.5	44425	1.9722e-09	62340	29514.6	62340	144531	44430	8.43022e-12	44430	8.14656e-11	77190	548275	47747	6.08655e-08	58590	36297.2	47670	1.43806e-12	59116	9.13784e-05	55283	0.180761	55283	0.046929	94920	4.63482e+06	45034	0.0621089	86220
	38331	12027	81840	44407.5	81840	46736.7	81840	196522	52036	108234	84980	21715	84980	236817	41549	8.19364e-06	41549	0	60980	75886	44445	2.05785e-09	62360	29648.7	62360	145508	44460	8.95137e-12	44460	8.58532e-11	77220	551359	47777	6.38758e-08	58620	36623.2	47690	1.50667e-12	59136	9.27021e-05	55303	0.182292	55303	0.0473857	94940	4.64688e+06	45054	0.0629078	86240
	38351	12131.3	81860	44630	81860	46954.9	81860	197495	52056	109437	85000	21892.4	85000	238094	41569	8.49445e-06	41569	0	61000	76394.5	44465	2.14699e-09	62380	29783.4	62380	146491	44490	9.503e-12	44490	9.04643e-11	77250	554458	47807	6.70265e-08	58650	36951.8	47710	1.57839e-12	59156	9.40439e-05	55323	0.183835	55323	0.0478466	94960	4.65897e+06	45074	0.0637163	86260
	38371	12236.3	81880	44853.5	81880	47174	81880	198473	52076	110653	85020	22071	85020	239377	41589	8.80553e-06	41589	0	61020	76906.1	44485	2.23977e-09	62400	29918.5	62400	147480	44520	1.00868e-11	44520	9.53096e-11	77280	557573	47837	7.03237e-08	58680	37283.1	47730	1.65333e-12	59176	9.5404e-05	55343	0.18539	55343	0.0483116	94980	4.67109e+06	45094	0.0645345	86280
	38391	12342.2	81900	45078	81900	47394	81900	199455	52096	111881	85040	22251.1	85040	240666	41609	9.12722e-06	41609	0	61040	77420.7	44505	2.33632e-09	62420	30054.2	62420	148475	44550	1.07045e-11	44550	1.00401e-10	77310	560702	47867	7.37738e-08	58710	37616.9	47750	1.73164e-12	59196	9.67828e-05	55363	0.186957	55363	0.0487808	95000	4.68323e+06	45114	0.0653624	86300
	38411	12448.8	81920	45303.6	81920	47614.9	81920	200442	52116	113122	85060	22432.5	85060	241961	41629	9.45985e-06	41629	0	61060	77938.4	44525	2.43678e-09	62440	30190.5	62440	149476	44580	1.13579e-11	44580	1.05749e-10	77340	563848	47897	7.73836e-08	58740	37953.5	47770	1.81347e-12	59216	9.81803e-05	55383	0.188537	55383	0.0492542	95020	4.6954e+06	45134	0.0662001	86320
	38431	12556.3	81940	45530.1	81940	47836.7	81940	201433	52136	114376	85080	22615.2	85080	243263	41649	9.80376e-06	41649	0	61080	78459.3	44545	2.54131e-09	62460	30327.2	62460	150483	44610	1.20491e-11	44610	1.11366e-10	77370	567009	47927	8.11599e-08	58770	38292.7	47790	1.89895e-12	59236	9.95969e-05	55403	0.190128	55403	0.0497319	95040	4.7076e+06	45154	0.0670478	86340
	38451	12664.6	81960	45757.7	81960	48059.5	81960	202429	52156	115642	85100	22799.4	85100	244572	41669	1.01593e-05	41669	0	61100	78983.2	44565	2.65005e-09	62480	30464.5	62480	151496	44640	1.27801e-11	44640	1.17266e-10	77400	570185	47957	8.511e-08	58800	38634.6	47810	1.98825e-12	59256	0.000101033	55423	0.191732	55423	0.0502138	95060	4.71983e+06	45174	0.0679056	86360
	38471	12773.7	81980	45986.3	81980	48283.2	81980	203428	52176	116921	85120	22985	85120	245886	41689	1.05269e-05	41689	0	61120	79510.2	44585	2.76318e-09	62500	30602.4	62500	152515	44670	1.3553e-11	44670	1.23462e-10	77430	573377	47987	8.92414e-08	58830	38979.3	47830	2.08153e-12	59276	0.000102488	55443	0.193349	55443	0.0507001	95080	4.73208e+06	45194	0.0687736	86380
	38491	12883.7	82000	46215.9	82000	48507.9	82000	204433	52196	118213	85140	23171.9	85140	247207	41709	1.09068e-05	41709	0	61140	80040.5	44605	2.88085e-09	62520	30740.7	62520	153541	44700	1.43702e-11	44700	1.29968e-10	77460	576585	48017	9.35619e-08	58860	39326.6	47850	2.17896e-12	59296	0.000103964	55463	0.194978	55463	0.0511907	95100	4.74436e+06	45214	0.0696519	86400
	38511	12994.4	82020	46446.5	82020	48733.4	82020	205442	52216	119519	85160	23360.3	85160	248535	41729	1.12995e-05	41729	0	61160	80573.8	44625	3.00323e-09	62540	30879.7	62540	154573	44730	1.52339e-11	44730	1.36797e-10	77490	579809	48047	9.80797e-08	58890	39676.8	47870	2.2807e-12	59316	0.000105459	55483	0.196619	55483	0.0516858	95120	4.75666e+06	45234	0.0705406	86420
	38531	13106.1	82040	46678.2	82040	48959.9	82040	206455	52236	120837	85180	23550.1	85180	249869	41749	1.17054e-05	41749	0	61180	81110.4	44645	3.13051e-09	62560	31019.2	62560	155611	44760	1.61468e-11	44760	1.43967e-10	77520	583049	48077	1.02803e-07	58920	40029.7	47890	2.38694e-12	59336	0.000106975	55503	0.198274	55503	0.0521853	95140	4.769e+06	45254	0.0714398	86440
	38551	13218.5	82060	46910.9	82060	49187.4	82060	207473	52256	122170	85200	23741.4	85200	251209	41769	1.21248e-05	41769	0	61200	81650.1	44665	3.26286e-09	62580	31159.2	62580	156655	44790	1.71114e-11	44790	1.51492e-10	77550	586304	48107	1.07741e-07	58950	40385.4	47910	2.49787e-12	59356	0.000108511	55523	0.199941	55523	0.0526892	95160	4.78136e+06	45274	0.0723497	86460
	38571	13331.8	82080	47144.7	82080	49415.7	82080	208495	52276	123515	85220	23934	85220	252556	41789	1.25582e-05	41789	0	61220	82193.1	44685	3.40048e-09	62600	31299.7	62600	157706	44820	1.81305e-11	44820	1.59389e-10	77580	589575	48137	1.12903e-07	58980	40743.9	47930	2.61368e-12	59376	0.000110068	55543	0.201621	55543	0.0531977	95180	4.79375e+06	45294	0.0732703	86480
	38591	13446	82100	47379.5	82100	49645.1	82100	209522	52296	124874	85240	24128.2	85240	253910	41809	1.30061e-05	41809	0	61240	82739.3	44705	3.54356e-09	62620	31440.9	62620	158763	44850	1.92071e-11	44850	1.67675e-10	77610	592863	48167	1.18298e-07	59010	41105.2	47950	2.73457e-12	59396	0.000111646	55563	0.203314	55563	0.0537107	95200	4.80617e+06	45314	0.0742018	86500
	38611	13561	82120	47615.4	82120	49875.4	82120	210553	52316	126247	85260	24323.8	85260	255270	41829	1.34688e-05	41829	0	61260	83288.7	44725	3.69231e-09	62640	31582.5	62640	159826	44880	2.03441e-11	44880	1.76369e-10	77640	596166	48197	1.23936e-07	59040	41469.4	47970	2.86077e-12	59416	0.000113246	55583	0.20502	55583	0.0542283	95220	4.81862e+06	45334	0.0751443	86520
	38631	13676.9	82140	47852.3	82140	50106.6	82140	211589	52336	127634	85280	24520.9	85280	256637	41849	1.39468e-05	41849	0	61280	83841.4	44745	3.84694e-09	62660	31724.8	62660	160896	44910	2.15449e-11	44910	1.8549e-10	77670	599486	48227	1.29827e-07	59070	41836.5	47990	2.99248e-12	59436	0.000114867	55603	0.206739	55603	0.0547505	95240	4.83109e+06	45354	0.0760979	86540
	38651	13793.7	82160	48090.2	82160	50338.8	82160	212629	52356	129035	85300	24719.5	85300	258011	41869	1.44407e-05	41869	0	61300	84397.4	44765	4.00766e-09	62680	31867.5	62680	161973	44940	2.28126e-11	44940	1.95057e-10	77700	602822	48257	1.35983e-07	59100	42206.4	48010	3.12993e-12	59456	0.00011651	55623	0.208471	55623	0.0552774	95260	4.84359e+06	45374	0.0770627	86560
	38671	13911.3	82180	48329.3	82180	50571.9	82180	213674	52376	130450	85320	24919.6	85320	259391	41889	1.49508e-05	41889	0	61320	84956.7	44785	4.1747e-09	62700	32010.9	62700	163055	44970	2.4151e-11	44970	2.05091e-10	77730	606175	48287	1.42414e-07	59130	42579.3	48030	3.27337e-12	59476	0.000118175	55643	0.210217	55643	0.0558089	95280	4.85612e+06	45394	0.0780389	86580
	38691	14029.9	82200	48569.4	82200	50806.1	82200	214724	52396	131880	85340	25121.1	85340	260778	41909	1.54777e-05	41909	0	61340	85519.3	44805	4.34829e-09	62720	32154.8	62720	164145	45000	2.55637e-11	45000	2.15613e-10	77760	609543	48317	1.49132e-07	59160	42955.1	48050	3.42303e-12	59496	0.000119863	55663	0.211976	55663	0.0563452	95300	4.86868e+06	45414	0.0790266	86600
	38711	14149.3	82220	48810.6	82220	51041.1	82220	215778	52416	133324	85360	25324.2	85360	262172	41929	1.60219e-05	41929	0	61360	86085.2	44825	4.52868e-09	62740	32299.3	62740	165241	45030	2.70545e-11	45030	2.26647e-10	77790	612929	48347	1.56148e-07	59190	43333.8	48070	3.57918e-12	59516	0.000121573	55683	0.213748	55683	0.0568863	95320	4.88126e+06	45434	0.0800258	86620
	38731	14269.6	82240	49052.8	82240	51277.2	82240	216837	52436	134782	85380	25528.9	85380	263572	41949	1.65839e-05	41949	0	61380	86654.5	44845	4.71612e-09	62760	32444.3	62760	166344	45060	2.86277e-11	45060	2.38214e-10	77820	616330	48377	1.63476e-07	59220	43715.5	48090	3.74208e-12	59536	0.000123307	55703	0.215535	55703	0.0574322	95340	4.89387e+06	45454	0.0810368	86640
	38751	14390.8	82260	49296.2	82260	51514.2	82260	217901	52456	136255	85400	25735.1	85400	264980	41969	1.71643e-05	41969	0	61400	87227.1	44865	4.91086e-09	62780	32589.9	62780	167453	45090	3.02874e-11	45090	2.50341e-10	77850	619749	48407	1.71129e-07	59250	44100.2	48110	3.912e-12	59556	0.000125064	55723	0.217335	55723	0.0579829	95360	4.90652e+06	45474	0.0820596	86660
	38771	14512.9	82280	49540.6	82280	51752.3	82280	218969	52476	137743	85420	25942.8	85420	266394	41989	1.77636e-05	41989	0	61420	87803.1	44885	5.11316e-09	62800	32736	62800	168569	45120	3.20381e-11	45120	2.63051e-10	77880	623184	48437	1.79119e-07	59280	44488	48130	4.08923e-12	59576	0.000126845	55743	0.219148	55743	0.0585385	95380	4.91918e+06	45494	0.0830945	86680
	38791	14636	82300	49786.1	82300	51991.2	82300	220043	52496	139246	85440	26152.1	85440	267815	42009	1.83824e-05	42009	0	61440	88382.6	44905	5.32332e-09	62820	32882.8	62820	169692	45150	3.38847e-11	45150	2.76372e-10	77910	626635	48467	1.87461e-07	59310	44878.7	48150	4.27407e-12	59596	0.000128649	55763	0.220976	55763	0.0590991	95400	4.93188e+06	45514	0.0841414	86700
	38811	14759.9	82320	50032.7	82320	52231.2	82320	221120	52516	140764	85460	26362.9	85460	269243	42029	1.90213e-05	42029	0	61460	88965.4	44925	5.54161e-09	62840	33030.1	62840	170821	45180	3.58319e-11	45180	2.90332e-10	77940	630104	48497	1.9617e-07	59340	45272.5	48170	4.46683e-12	59616	0.000130478	55783	0.222818	55783	0.0596646	95420	4.94461e+06	45534	0.0852006	86720
	38831	14884.8	82340	50280.4	82340	52472.2	82340	222203	52536	142298	85480	26575.4	85480	270677	42049	1.96808e-05	42049	0	61480	89551.7	44945	5.76833e-09	62860	33177.9	62860	171957	45210	3.78851e-11	45210	3.04959e-10	77970	633589	48527	2.0526e-07	59370	45669.4	48190	4.66782e-12	59636	0.000132331	55803	0.224674	55803	0.0602352	95440	4.95736e+06	45554	0.0862721	86740
	38851	15010.6	82360	50529.2	82360	52714.2	82360	223290	52556	143846	85500	26789.4	85500	272119	42069	2.03617e-05	42069	0	61500	90141.5	44965	6.00378e-09	62880	33326.4	62880	173101	45240	4.00497e-11	45240	3.20283e-10	78000	637092	48557	2.14748e-07	59400	46069.4	48210	4.87739e-12	59656	0.00013421	55823	0.226543	55823	0.0608108	95460	4.97014e+06	45574	0.0873561	86760
	38871	15137.4	82380	50779.1	82380	52957.1	82380	224382	52576	145410	85520	27005	85520	273568	42089	2.10644e-05	42089	0	61520	90734.7	44985	6.24828e-09	62900	33475.4	62900	174250	45270	4.23312e-11	45270	3.36336e-10	78030	640611	48587	2.24649e-07	59430	46472.5	48230	5.09587e-12	59676	0.000136113	55843	0.228428	55843	0.0613915	95480	4.98296e+06	45594	0.0884528	86780
	38891	15265	82400	51030.1	82400	53201.1	82400	225479	52596	146990	85540	27222.3	85540	275024	42109	2.17898e-05	42109	0	61540	91331.4	45005	6.50215e-09	62920	33625	62920	175407	45300	4.47358e-11	45300	3.53151e-10	78060	644148	48617	2.34981e-07	59460	46878.7	48250	5.32363e-12	59696	0.000138042	55863	0.230326	55863	0.0619773	95500	4.99579e+06	45614	0.0895623	86800
	38911	15393.7	82420	51282.3	82420	53446	82420	226581	52616	148586	85560	27441.2	85560	276486	42129	2.25384e-05	42129	0	61560	91931.6	45025	6.76574e-09	62940	33775.2	62940	176571	45330	4.72697e-11	45330	3.70761e-10	78090	647701	48647	2.45761e-07	59490	47288.1	48270	5.56104e-12	59716	0.000139997	55883	0.23224	55883	0.0625683	95520	5.00866e+06	45634	0.0906847	86820
	38931	15523.3	82440	51535.5	82440	53692	82440	227687	52636	150197	85580	27661.7	85580	277956	42149	2.3311e-05	42149	0	61580	92535.3	45045	7.03939e-09	62960	33926	62960	177742	45360	4.99395e-11	45360	3.89202e-10	78120	651272	48677	2.57008e-07	59520	47700.7	48290	5.80848e-12	59736	0.000141977	55903	0.234167	55903	0.0631645	95540	5.02156e+06	45654	0.0918201	86840
	38951	15653.8	82460	51789.9	82460	53939	82460	228799	52656	151825	85600	27883.9	85600	279433	42169	2.41083e-05	42169	0	61600	93142.6	45065	7.32347e-09	62980	34077.3	62980	178920	45390	5.2752e-11	45390	4.08512e-10	78150	654860	48707	2.6874e-07	59550	48116.4	48310	6.06635e-12	59756	0.000143985	55923	0.23611	55923	0.063766	95560	5.03448e+06	45674	0.0929687	86860
	38971	15785.3	82480	52045.4	82480	54187	82480	229915	52676	153469	85620	28107.7	85620	280917	42189	2.4931e-05	42189	0	61620	93753.5	45085	7.61834e-09	63000	34229.2	63000	180105	45420	5.57144e-11	45420	4.28728e-10	78180	658466	48737	2.80977e-07	59580	48535.4	48330	6.33508e-12	59776	0.000146019	55943	0.238067	55943	0.0643728	95580	5.04744e+06	45694	0.0941307	86880
	38991	15917.8	82500	52302	82500	54436	82500	231036	52696	155129	85640	28333.2	85640	282409	42209	2.57798e-05	42209	0	61640	94367.9	45105	7.9244e-09	63020	34381.8	63020	181297	45450	5.88344e-11	45450	4.49891e-10	78210	662089	48767	2.9374e-07	59610	48957.6	48350	6.6151e-12	59796	0.00014808	55963	0.240039	55963	0.0649849	95600	5.06042e+06	45714	0.0953061	86900
	39011	16051.3	82520	52559.8	82520	54686	82520	232162	52716	156806	85660	28560.4	85660	283907	42229	2.66555e-05	42229	0	61660	94986	45125	8.24204e-09	63040	34534.9	63040	182496	45480	6.21197e-11	45480	4.72043e-10	78240	665729	48797	3.0705e-07	59640	49383.1	48370	6.90684e-12	59816	0.000150169	55983	0.242026	55983	0.0656024	95620	5.07343e+06	45734	0.0964951	86920
	39031	16185.7	82540	52818.7	82540	54937.1	82540	233293	52736	158500	85680	28789.3	85680	285413	42249	2.7559e-05	42249	0	61680	95607.6	45145	8.57166e-09	63060	34688.6	63060	183702	45510	6.55787e-11	45510	4.95227e-10	78270	669388	48827	3.20929e-07	59670	49811.9	48390	7.21079e-12	59836	0.000152285	56003	0.244028	56003	0.0662254	95640	5.08647e+06	45754	0.0976979	86940
	39051	16321.2	82560	53078.8	82560	55189.2	82560	234429	52756	160210	85700	29019.9	85700	286926	42269	2.8491e-05	42269	0	61700	96232.9	45165	8.91371e-09	63080	34842.9	63080	184916	45540	6.922e-11	45540	5.1949e-10	78300	673063	48857	3.354e-07	59700	50244	48410	7.52741e-12	59856	0.00015443	56023	0.246046	56023	0.0668538	95660	5.09954e+06	45774	0.0989146	86960
	39071	16457.6	82580	53340	82580	55442.3	82580	235570	52776	161938	85720	29252.2	85720	288446	42289	2.94523e-05	42289	0	61720	96861.9	45185	9.26861e-09	63100	34997.8	63100	186136	45570	7.30528e-11	45570	5.44877e-10	78330	676757	48887	3.50486e-07	59730	50679.5	48430	7.85721e-12	59876	0.000156603	56043	0.248079	56043	0.0674878	95680	5.11264e+06	45794	0.100145	86980
	39091	16595	82600	53602.4	82600	55696.4	82600	236716	52796	163682	85740	29486.3	85740	289974	42309	3.04439e-05	42309	0	61740	97494.5	45205	9.63682e-09	63120	35153.3	63120	187364	45600	7.70865e-11	45600	5.71438e-10	78360	680468	48917	3.66213e-07	59760	51118.2	48450	8.20072e-12	59896	0.000158806	56063	0.250127	56063	0.0681273	95700	5.12577e+06	45814	0.10139	87000
	39111	16733.5	82620	53865.9	82620	55951.6	82620	237867	52816	165444	85760	29722.1	85760	291509	42329	3.14666e-05	42329	0	61760	98130.8	45225	1.00188e-08	63140	35309.4	63140	188600	45630	8.13311e-11	45630	5.99225e-10	78390	684197	48947	3.82605e-07	59790	51560.4	48470	8.55846e-12	59916	0.000161037	56083	0.252191	56083	0.0687724	95720	5.13892e+06	45834	0.10265	87020
	39131	16872.9	82640	54130.6	82640	56207.9	82640	239023	52836	167223	85780	29959.6	85780	293051	42349	3.25213e-05	42349	0	61780	98770.8	45245	1.04151e-08	63160	35466	63160	189842	45660	8.57969e-11	45660	6.28291e-10	78420	687945	48977	3.99689e-07	59820	52006	48490	8.93099e-12	59936	0.000163298	56103	0.25427	56103	0.0694232	95740	5.15211e+06	45854	0.103924	87040
	39151	17013.4	82660	54396.5	82660	56465.2	82660	240184	52856	169020	85800	30198.9	85800	294601	42369	3.36089e-05	42369	0	61800	99414.6	45265	1.08261e-08	63180	35623.3	63180	191092	45690	9.0495e-11	45690	6.58692e-10	78450	691710	49007	4.17493e-07	59850	52454.9	48510	9.31891e-12	59956	0.000165589	56123	0.256365	56123	0.0700797	95760	5.16532e+06	45874	0.105212	87060
	39171	17155	82680	54663.5	82680	56723.5	82680	241350	52876	170835	85820	30440	85820	296158	42389	3.47304e-05	42389	0	61820	100062	45285	1.12524e-08	63200	35781.2	63200	192350	45720	9.54366e-11	45720	6.90485e-10	78480	695493	49037	4.36045e-07	59880	52907.4	48530	9.7228e-12	59976	0.00016791	56143	0.258476	56143	0.070742	95780	5.17857e+06	45894	0.106515	87080
	39191	17297.5	82700	54931.7	82700	56982.9	82700	242521	52896	172668	85840	30682.9	85840	297723	42409	3.58868e-05	42409	0	61840	100713	45305	1.16945e-08	63220	35939.8	63220	193615	45750	1.00634e-10	45750	7.23731e-10	78510	699294	49067	4.55375e-07	59910	53363.3	48550	1.01433e-11	59996	0.000170262	56163	0.260603	56163	0.07141	95800	5.19184e+06	45914	0.107834	87100
	39211	17441.1	82720	55201.1	82720	57243.3	82720	243697	52916	174518	85860	30927.6	85860	299295	42429	3.7079e-05	42429	0	61860	101368	45325	1.2153e-08	63240	36098.9	63240	194888	45780	1.06099e-10	45780	7.58492e-10	78540	703114	49097	4.75514e-07	59940	53822.7	48570	1.0581e-11	60016	0.000172645	56183	0.262746	56183	0.0720839	95820	5.20514e+06	45934	0.109167	87120
	39231	17585.7	82740	55471.7	82740	57504.9	82740	244878	52936	176387	85880	31174.1	85880	300875	42449	3.83082e-05	42449	0	61880	102027	45345	1.26284e-08	63260	36258.6	63260	196168	45810	1.11845e-10	45810	7.94833e-10	78570	706952	49127	4.96492e-07	59970	54285.6	48590	1.10367e-11	60036	0.00017506	56203	0.264905	56203	0.0727637	95840	5.21847e+06	45954	0.110516	87140
	39251	17731.4	82760	55743.4	82760	57767.4	82760	246065	52956	178275	85900	31422.5	85900	302463	42469	3.95753e-05	42469	0	61900	102690	45365	1.31213e-08	63280	36418.9	63280	197455	45840	1.17886e-10	45840	8.32823e-10	78600	710809	49157	5.18344e-07	60000	54752	48610	1.15109e-11	60056	0.000177507	56223	0.26708	56223	0.0734494	95860	5.23183e+06	45974	0.11188	87160
	39271	17878.2	82780	56016.4	82780	58031.1	82780	247256	52976	180181	85920	31672.6	85920	304058	42489	4.08815e-05	42489	0	61920	103357	45385	1.36324e-08	63300	36579.9	63300	198751	45870	1.24236e-10	45870	8.72531e-10	78630	714684	49187	5.41104e-07	60030	55222	48630	1.20045e-11	60076	0.000179985	56243	0.269272	56243	0.074141	95880	5.24522e+06	45994	0.11326	87180
	39291	18026	82800	56290.6	82800	58295.8	82800	248453	52996	182106	85940	31924.7	85940	305660	42509	4.22279e-05	42509	0	61940	104027	45405	1.41622e-08	63320	36741.5	63320	200054	45900	1.30909e-10	45900	9.14032e-10	78660	718577	49217	5.64806e-07	60060	55695.6	48650	1.25181e-11	60096	0.000182497	56263	0.271481	56263	0.0748387	95900	5.25864e+06	46014	0.114656	87200
	39311	18174.9	82820	56565.9	82820	58561.6	82820	249655	53016	184049	85960	32178.6	85960	307271	42529	4.36156e-05	42529	0	61960	104701	45425	1.47114e-08	63340	36903.7	63340	201364	45930	1.37923e-10	45930	9.57402e-10	78690	722489	49247	5.89487e-07	60090	56172.8	48670	1.30526e-11	60116	0.000185041	56283	0.273706	56283	0.0755425	95920	5.27209e+06	46034	0.116067	87220
	39331	18324.9	82840	56842.5	82840	58828.5	82840	250863	53036	186012	85980	32434.4	85980	308889	42549	4.50458e-05	42549	0	61980	105380	45445	1.52807e-08	63360	37066.5	63360	202683	45960	1.45292e-10	45960	1.00272e-09	78720	726420	49277	6.15186e-07	60120	56653.6	48690	1.36088e-11	60136	0.00018762	56303	0.275947	56303	0.0762525	95940	5.28557e+06	46054	0.117495	87240
	39351	18476	82860	57120.3	82860	59096.5	82860	252075	53056	187994	86000	32692	86000	310515	42569	4.65197e-05	42569	0	62000	106062	45465	1.58708e-08	63380	37229.9	63380	204009	45990	1.53034e-10	45990	1.05007e-09	78750	730370	49307	6.41943e-07	60150	57138.1	48710	1.41874e-11	60156	0.000190232	56323	0.278206	56323	0.0769685	95960	5.29908e+06	46074	0.118939	87260
	39371	18628.2	82880	57399.3	82880	59365.5	82880	253293	53076	189996	86020	32951.6	86020	312148	42589	4.80385e-05	42589	0	62020	106748	45485	1.64823e-08	63400	37394	63400	205343	46020	1.61166e-10	46020	1.09953e-09	78780	734338	49337	6.69797e-07	60180	57626.3	48730	1.47893e-11	60176	0.000192878	56343	0.280482	56343	0.0776909	95980	5.31262e+06	46094	0.120399	87280
	39391	18781.4	82900	57679.6	82900	59635.7	82900	254516	53096	192017	86040	33213.1	86040	313789	42609	4.96036e-05	42609	0	62040	107438	45505	1.7116e-08	63420	37558.7	63420	206685	46050	1.69708e-10	46050	1.1512e-09	78810	738326	49367	6.98792e-07	60210	58118.2	48750	1.54155e-11	60196	0.000195559	56363	0.282774	56363	0.0784195	96000	5.32619e+06	46114	0.121876	87300
	39411	18935.8	82920	57961	82920	59906.9	82920	255744	53116	194058	86060	33476.5	86060	315439	42629	5.12161e-05	42629	0	62060	108132	45525	1.77727e-08	63440	37724	63440	208035	46080	1.78679e-10	46080	1.20517e-09	78840	742332	49397	7.28971e-07	60240	58613.8	48770	1.60668e-11	60216	0.000198275	56383	0.285084	56383	0.0791544	96020	5.33979e+06	46134	0.12337	87320
	39431	19091.3	82940	58243.7	82940	60179.3	82940	256978	53136	196119	86080	33741.9	86080	317096	42649	5.28776e-05	42649	0	62080	108830	45545	1.84532e-08	63460	37889.9	63460	209393	46110	1.88099e-10	46110	1.26154e-09	78870	746358	49427	7.60379e-07	60270	59113.1	48790	1.67442e-11	60236	0.000201027	56403	0.287411	56403	0.0798957	96040	5.35341e+06	46154	0.124881	87340
	39451	19247.9	82960	58527.7	82960	60452.7	82960	258217	53156	198200	86100	34009.2	86100	318761	42669	5.45892e-05	42669	0	62100	109532	45565	1.91581e-08	63480	38056.5	63480	210759	46140	1.97989e-10	46140	1.3204e-09	78900	750402	49457	7.93064e-07	60300	59616.3	48810	1.74487e-11	60256	0.000203815	56423	0.289756	56423	0.0806434	96060	5.36707e+06	46174	0.126409	87360
	39471	19405.7	82980	58812.9	82980	60727.3	82980	259461	53176	200301	86120	34278.6	86120	320434	42689	5.63525e-05	42689	0	62120	110238	45585	1.98885e-08	63500	38223.7	63500	212133	46170	2.08372e-10	46170	1.38186e-09	78930	754466	49487	8.27076e-07	60330	60123.2	48830	1.81814e-11	60276	0.00020664	56443	0.292118	56443	0.0813976	96080	5.38076e+06	46194	0.127954	87380
	39491	19564.6	83000	59099.3	83000	61003	83000	260711	53196	202423	86140	34549.8	86140	322115	42709	5.81689e-05	42709	0	62140	110948	45605	2.06451e-08	63520	38391.6	63520	213515	46200	2.1927e-10	46200	1.44602e-09	78960	758549	49517	8.62463e-07	60360	60634	48850	1.89432e-11	60296	0.000209501	56463	0.294498	56463	0.0821583	96100	5.39448e+06	46214	0.129517	87400
	39511	19724.6	83020	59387	83020	61279.8	83020	261966	53216	204566	86160	34823.1	86160	323804	42729	6.00399e-05	42729	0	62160	111662	45625	2.14289e-08	63540	38560.1	63540	214905	46230	2.30708e-10	46230	1.51301e-09	78990	762652	49547	8.99279e-07	60390	61148.6	48870	1.97353e-11	60316	0.0002124	56483	0.296895	56483	0.0829256	96120	5.40823e+06	46234	0.131098	87420
	39531	19885.8	83040	59675.9	83040	61557.7	83040	263227	53236	206729	86180	35098.4	86180	325501	42749	6.19669e-05	42749	0	62180	112381	45645	2.22406e-08	63560	38729.2	63560	216304	46260	2.42712e-10	46260	1.58294e-09	79020	766774	49577	9.37577e-07	60420	61667.1	48890	2.05588e-11	60336	0.000215337	56503	0.299311	56503	0.0836996	96140	5.42201e+06	46254	0.132696	87440
	39551	20048.1	83060	59966.1	83060	61836.7	83060	264493	53256	208914	86200	35375.8	86200	327206	42769	6.39517e-05	42769	0	62200	113103	45665	2.30814e-08	63580	38899	63580	217710	46290	2.55307e-10	46290	1.65593e-09	79050	770916	49607	9.77415e-07	60450	62189.5	48910	2.14149e-11	60356	0.000218312	56523	0.301745	56523	0.0844802	96160	5.43582e+06	46274	0.134313	87460
	39571	20211.6	83080	60257.6	83080	62116.9	83080	265765	53276	211120	86220	35655.1	86220	328919	42789	6.59956e-05	42789	0	62220	113830	45685	2.39521e-08	63600	39069.4	63600	219125	46320	2.68521e-10	46320	1.7321e-09	79080	775077	49637	1.01885e-06	60480	62715.9	48930	2.23048e-11	60376	0.000221326	56543	0.304196	56543	0.0852676	96180	5.44966e+06	46294	0.135948	87480
	39591	20376.3	83100	60550.3	83100	62398.2	83100	267042	53296	213347	86240	35936.5	86240	330641	42809	6.81005e-05	42809	0	62240	114561	45705	2.48538e-08	63620	39240.5	63620	220548	46350	2.82383e-10	46350	1.81159e-09	79110	779259	49667	1.06194e-06	60510	63246.2	48950	2.32298e-11	60396	0.000224379	56563	0.306666	56563	0.0860617	96200	5.46352e+06	46314	0.137601	87500
	39611	20542.1	83120	60844.3	83120	62680.6	83120	268324	53316	215596	86260	36220	86260	332370	42829	7.02679e-05	42829	0	62260	115296	45725	2.57875e-08	63640	39412.2	63640	221980	46380	2.96923e-10	46380	1.89454e-09	79140	783459	49697	1.10675e-06	60540	63780.4	48970	2.41913e-11	60416	0.000227472	56583	0.309155	56583	0.0868627	96220	5.47742e+06	46334	0.139273	87520
	39631	20709.2	83140	61139.6	83140	62964.2	83140	269612	53336	217866	86280	36505.6	86280	334108	42849	7.24996e-05	42849	0	62280	116035	45745	2.67542e-08	63660	39584.6	63660	223419	46410	3.12172e-10	46410	1.98108e-09	79170	787680	49727	1.15335e-06	60570	64318.7	48990	2.51904e-11	60436	0.000230605	56603	0.311662	56603	0.0876706	96240	5.49136e+06	46354	0.140964	87540
	39651	20877.4	83160	61436.2	83160	63248.9	83160	270906	53356	220159	86300	36793.3	86300	335854	42869	7.47974e-05	42869	0	62300	116779	45765	2.77552e-08	63680	39757.6	63680	224868	46440	3.28163e-10	46440	2.07136e-09	79200	791921	49757	1.2018e-06	60600	64861.1	49010	2.62288e-11	60456	0.000233779	56623	0.314187	56623	0.0884855	96260	5.50532e+06	46374	0.142673	87560
	39671	21046.8	83180	61734.1	83180	63534.8	83180	272205	53376	222474	86320	37083	86320	337609	42889	7.71631e-05	42889	0	62320	117526	45785	2.87914e-08	63700	39931.3	63700	226325	46470	3.4493e-10	46470	2.16554e-09	79230	796182	49787	1.25216e-06	60630	65407.4	49030	2.73077e-11	60476	0.000236994	56643	0.316732	56643	0.0893074	96280	5.51931e+06	46394	0.144402	87580
	39691	21217.5	83200	62033.3	83200	63821.8	83200	273510	53396	224811	86340	37374.9	86340	339371	42909	7.95986e-05	42909	0	62340	118278	45805	2.9864e-08	63720	40105.6	63720	227790	46500	3.62509e-10	46500	2.26377e-09	79260	800463	49817	1.30452e-06	60660	65957.9	49050	2.84288e-11	60496	0.000240251	56663	0.319295	56663	0.0901363	96300	5.53333e+06	46414	0.146151	87600
	39711	21389.3	83220	62333.8	83220	64110	83220	274820	53416	227171	86360	37669	86360	341142	42929	8.21057e-05	42929	0	62360	119035	45825	3.09744e-08	63740	40280.6	63740	229264	46530	3.80936e-10	46530	2.36622e-09	79290	804764	49847	1.35895e-06	60690	66512.5	49070	2.95935e-11	60516	0.00024355	56683	0.321878	56683	0.0909724	96320	5.54738e+06	46434	0.147919	87620
	39731	21562.4	83240	62635.6	83240	64399.4	83240	276136	53436	229554	86380	37965.2	86380	342922	42949	8.46864e-05	42949	0	62380	119795	45845	3.21237e-08	63760	40456.3	63760	230746	46560	4.0025e-10	46560	2.47306e-09	79320	809085	49877	1.41552e-06	60720	67071.2	49090	3.08035e-11	60536	0.000246892	56703	0.324479	56703	0.0918156	96340	5.56147e+06	46454	0.149707	87640
	39751	21736.7	83260	62938.6	83260	64689.9	83260	277458	53456	231959	86400	38263.5	86400	344710	42969	8.73427e-05	42969	0	62400	120560	45865	3.33131e-08	63780	40632.6	63780	232237	46590	4.20493e-10	46590	2.58447e-09	79350	813427	49907	1.47431e-06	60750	67634.1	49110	3.20605e-11	60556	0.000250277	56723	0.3271	56723	0.0926661	96360	5.57558e+06	46474	0.151515	87660
	39771	21912.3	83280	63243.1	83280	64981.5	83280	278785	53476	234388	86420	38564.1	86420	346506	42989	9.00767e-05	42989	1.52878e-15	62420	121329	45885	3.45441e-08	63800	40809.6	63800	233737	46620	4.41705e-10	46620	2.70063e-09	79380	817789	49937	1.5354e-06	60780	68201.2	49130	3.33661e-11	60576	0.000253706	56743	0.32974	56743	0.0935238	96380	5.58973e+06	46494	0.153343	87680
	39791	22089.1	83300	63548.8	83300	65274.4	83300	280118	53496	236840	86440	38866.8	86440	348311	43009	9.28905e-05	43009	1.5058e-15	62440	122103	45905	3.5818e-08	63820	40987.2	63820	235246	46650	4.63931e-10	46650	2.82173e-09	79410	822172	49967	1.59888e-06	60810	68772.5	49150	3.47222e-11	60596	0.000257179	56763	0.3324	56763	0.0943889	96400	5.6039e+06	46514	0.155192	87700
	39811	22267.1	83320	63855.9	83320	65568.4	83320	281457	53516	239316	86460	39171.8	86460	350124	43029	9.57863e-05	43029	1.48318e-15	62460	122881	45925	3.71362e-08	63840	41165.6	63840	236763	46680	4.87216e-10	46680	2.94797e-09	79440	826575	49997	1.66484e-06	60840	69348	49170	3.61306e-11	60616	0.000260697	56783	0.33508	56783	0.0952614	96420	5.61811e+06	46534	0.157061	87720
	39831	22446.5	83340	64164.2	83340	65863.6	83340	282802	53536	241816	86480	39478.9	86480	351946	43049	9.87662e-05	43049	5.84361e-15	62480	123664	45945	3.85001e-08	63860	41344.6	63860	238290	46710	5.11609e-10	46710	3.07957e-09	79470	830999	50027	1.73337e-06	60870	69927.9	49190	3.75932e-11	60636	0.000264261	56803	0.337779	56803	0.0961414	96440	5.63235e+06	46554	0.158951	87740
	39851	22627	83360	64474	83360	66160	83360	284152	53556	244339	86500	39788.4	86500	353777	43069	0.000101833	43069	5.75586e-15	62500	124451	45965	3.99112e-08	63880	41524.3	63880	239825	46740	5.37159e-10	46740	3.21672e-09	79500	835444	50057	1.80455e-06	60900	70512	49210	3.9112e-11	60656	0.000267871	56823	0.340498	56823	0.0970289	96460	5.64662e+06	46574	0.160862	87760
	39871	22808.9	83380	64785	83380	66457.6	83380	285508	53576	246887	86520	40100	86520	355616	43089	0.000104988	43089	7.08683e-15	62520	125242	45985	4.13712e-08	63900	41704.6	63900	241369	46770	5.63918e-10	46770	3.35966e-09	79530	839910	50087	1.8785e-06	60930	71100.5	49230	4.0689e-11	60676	0.000271527	56843	0.343237	56843	0.097924	96480	5.66092e+06	46594	0.162795	87780
	39891	22992	83400	65097.5	83400	66756.4	83400	286870	53596	249460	86540	40414	86540	357464	43109	0.000108234	43109	1.53571e-14	62540	126038	46005	4.28814e-08	63920	41885.6	63920	242922	46800	5.9194e-10	46800	3.50861e-09	79560	844396	50117	1.95531e-06	60960	71693.3	49250	4.23264e-11	60696	0.00027523	56863	0.345997	56863	0.0988267	96500	5.67525e+06	46614	0.164749	87800
	39911	23176.5	83420	65411.2	83420	67056.3	83420	288238	53616	252057	86560	40730.2	86560	359321	43129	0.000111574	43129	1.65019e-14	62560	126839	46025	4.44437e-08	63940	42067.3	63940	244484	46830	6.21281e-10	46830	3.66381e-09	79590	848904	50147	2.03508e-06	60990	72290.5	49270	4.40264e-11	60716	0.000278981	56883	0.348777	56883	0.0997371	96520	5.68961e+06	46634	0.166725	87820
	39931	23362.2	83440	65726.4	83440	67357.5	83440	289611	53636	254678	86580	41048.7	86580	361187	43149	0.00011501	43149	2.16725e-14	62580	127644	46045	4.60596e-08	63960	42249.7	63960	246055	46860	6.52e-10	46860	3.82552e-09	79620	853433	50177	2.11792e-06	61020	72892.1	49290	4.57911e-11	60736	0.00028278	56903	0.351577	56903	0.100655	96540	5.70401e+06	46654	0.168723	87840
	39951	23549.2	83460	66042.9	83460	67659.9	83460	290991	53656	257325	86600	41369.6	86600	363061	43169	0.000118544	43169	3.46898e-14	62600	128453	46065	4.77309e-08	63980	42432.8	63980	247635	46890	6.84158e-10	46890	3.99398e-09	79650	857983	50207	2.20394e-06	61050	73498.2	49310	4.7623e-11	60756	0.000286628	56923	0.354399	56923	0.101581	96560	5.71843e+06	46674	0.170743	87860
	39971	23737.6	83480	66360.7	83480	67963.5	83480	292376	53676	259998	86620	41692.8	86620	364944	43189	0.00012218	43189	3.67984e-14	62620	129267	46085	4.94594e-08	64000	42616.6	64000	249225	46920	7.17819e-10	46920	4.16947e-09	79680	862554	50237	2.29326e-06	61080	74108.7	49330	4.95244e-11	60776	0.000290526	56943	0.35724	56943	0.102515	96580	5.73289e+06	46694	0.172785	87880
	39991	23927.3	83500	66680	83500	68268.3	83500	293768	53696	262696	86640	42018.3	86640	366836	43209	0.00012592	43209	4.91924e-14	62640	130086	46105	5.12469e-08	64020	42801	64020	250823	46950	7.53049e-10	46950	4.35225e-09	79710	867147	50267	2.38599e-06	61110	74723.8	49350	5.14979e-11	60796	0.000294473	56963	0.360103	56963	0.103457	96600	5.74738e+06	46714	0.17485	87900
	40011	24118.3	83520	67000.6	83520	68574.3	83520	295165	53716	265419	86660	42346.2	86660	368737	43229	0.000129766	43229	7.01332e-14	62660	130910	46125	5.30954e-08	64040	42986.2	64040	252431	46980	7.89917e-10	46980	4.54263e-09	79740	871761	50297	2.48226e-06	61140	75343.3	49370	5.3546e-11	60816	0.000298471	56983	0.362987	56983	0.104407	96620	5.7619e+06	46734	0.176938	87920
	40031	24310.6	83540	67322.6	83540	68881.6	83540	296568	53736	268169	86680	42676.5	86680	370647	43249	0.000133722	43249	7.53634e-14	62680	131738	46145	5.50067e-08	64060	43172	64060	254048	47010	8.28496e-10	47010	4.74089e-09	79770	876397	50327	2.5822e-06	61170	75967.4	49390	5.56715e-11	60836	0.000302521	57003	0.365892	57003	0.105365	96640	5.77645e+06	46754	0.179049	87940
	40051	24504.3	83560	67645.9	83560	69190	83560	297977	53756	270944	86700	43009.2	86700	372566	43269	0.000137791	43269	9.52686e-14	62700	132570	46165	5.69829e-08	64080	43358.6	64080	255675	47040	8.6886e-10	47040	4.94734e-09	79800	881054	50357	2.68594e-06	61200	76596.2	49410	5.78771e-11	60856	0.000306622	57023	0.368818	57023	0.106331	96660	5.79103e+06	46774	0.181183	87960
	40071	24699.4	83580	67970.7	83580	69499.7	83580	299392	53776	273747	86720	43344.3	86720	374493	43289	0.000141975	43289	1.24312e-13	62720	133408	46185	5.9026e-08	64100	43545.8	64100	257311	47070	9.11088e-10	47070	5.1623e-09	79830	885733	50387	2.7936e-06	61230	77229.5	49430	6.01656e-11	60876	0.000310776	57043	0.371766	57043	0.107305	96680	5.80565e+06	46794	0.183341	87980
	40091	24895.8	83600	68296.9	83600	69810.7	83600	300814	53796	276575	86740	43681.8	86740	376430	43309	0.000146277	43309	1.38059e-13	62740	134250	46205	6.11383e-08	64120	43733.8	64120	258956	47100	9.5526e-10	47100	5.38611e-09	79860	890434	50417	2.90534e-06	61260	77867.5	49450	6.254e-11	60896	0.000314983	57063	0.374735	57063	0.108287	96700	5.82029e+06	46814	0.185523	88000
	40111	25093.6	83620	68624.5	83620	70122.9	83620	302241	53816	279431	86760	44021.8	86760	378376	43329	0.000150701	43329	1.70288e-13	62760	135097	46225	6.33218e-08	64140	43922.4	64140	260611	47130	1.00146e-09	47130	5.61911e-09	79890	895156	50447	3.0213e-06	61290	78510.1	49470	6.50033e-11	60916	0.000319243	57083	0.377727	57083	0.109278	96720	5.83497e+06	46834	0.187729	88020
	40131	25292.7	83640	68953.5	83640	70436.3	83640	303674	53836	282314	86780	44364.2	86780	380332	43349	0.00015525	43349	2.09678e-13	62780	135948	46245	6.55789e-08	64160	44111.7	64160	262276	47160	1.04978e-09	47160	5.86164e-09	79920	899901	50477	3.14162e-06	61320	79157.5	49490	6.75588e-11	60936	0.000323558	57103	0.38074	57103	0.110277	96740	5.84968e+06	46854	0.189959	88040
	40151	25493.3	83660	69283.9	83660	70751	83660	305114	53856	285224	86800	44709.1	86800	382296	43369	0.000159927	43369	2.34084e-13	62800	136805	46265	6.79119e-08	64180	44301.8	64180	263950	47190	1.10031e-09	47190	6.1141e-09	79950	904668	50507	3.26647e-06	61350	79809.6	49510	7.02096e-11	60956	0.000327928	57123	0.383775	57123	0.111285	96760	5.86443e+06	46874	0.192214	88060
	40171	25695.2	83680	69615.7	83680	71066.9	83680	306559	53876	288162	86820	45056.5	86820	384270	43389	0.000164735	43389	2.7919e-13	62820	137666	46285	7.03231e-08	64200	44492.6	64200	265633	47220	1.15314e-09	47220	6.37684e-09	79980	909457	50537	3.396e-06	61380	80466.4	49530	7.29592e-11	60976	0.000332354	57143	0.386832	57143	0.112301	96780	5.8792e+06	46894	0.194494	88080
	40191	25898.6	83700	69948.9	83700	71384.1	83700	308011	53896	291127	86840	45406.4	86840	386252	43409	0.000169678	43409	3.30693e-13	62840	138532	46305	7.28151e-08	64220	44684	64220	267327	47250	1.20838e-09	47250	6.65028e-09	80010	914268	50567	3.53037e-06	61410	81128.1	49550	7.5811e-11	60996	0.000336836	57163	0.389912	57163	0.113326	96800	5.89401e+06	46914	0.196798	88100
	40211	26103.3	83720	70283.6	83720	71702.5	83720	309469	53916	294121	86860	45758.9	86860	388244	43429	0.00017476	43429	3.74015e-13	62860	139403	46325	7.53903e-08	64240	44876.2	64240	269030	47280	1.26612e-09	47280	6.93482e-09	80040	919101	50597	3.66976e-06	61440	81794.5	49570	7.87687e-11	61016	0.000341375	57183	0.393014	57183	0.114359	96820	5.90885e+06	46934	0.199128	88120
	40231	26309.5	83740	70619.7	83740	72022.3	83740	310933	53936	297143	86880	46113.9	86880	390246	43449	0.000179983	43449	4.34339e-13	62880	140279	46345	7.80515e-08	64260	45069.1	64260	270743	47310	1.32648e-09	47310	7.23089e-09	80070	923957	50627	3.81435e-06	61470	82465.9	49590	8.18359e-11	61036	0.000345972	57203	0.396139	57203	0.115402	96840	5.92372e+06	46954	0.201484	88140
	40251	26517.1	83760	70957.3	83760	72343.3	83760	312403	53956	300194	86900	46471.4	86900	392257	43469	0.000185352	43469	5.0449e-13	62900	141160	46365	8.08013e-08	64280	45262.7	64280	272465	47340	1.38957e-09	47340	7.53892e-09	80100	928835	50657	3.96431e-06	61500	83142.1	49610	8.50165e-11	61056	0.000350627	57223	0.399286	57223	0.116452	96860	5.93862e+06	46974	0.203865	88160
	40271	26726.2	83780	71296.3	83780	72665.5	83780	313880	53976	303273	86920	46831.6	86920	394277	43489	0.00019087	43489	5.70356e-13	62920	142045	46385	8.36424e-08	64300	45457.1	64300	274198	47370	1.4555e-09	47370	7.85938e-09	80130	933736	50687	4.11983e-06	61530	83823.2	49630	8.83145e-11	61076	0.000355341	57243	0.402457	57243	0.117512	96880	5.95355e+06	46994	0.206273	88180
	40291	26936.7	83800	71636.8	83800	72989.1	83800	315363	53996	306382	86940	47194.3	86940	396307	43509	0.000196541	43509	6.52738e-13	62940	142936	46405	8.65778e-08	64320	45652.1	64320	275941	47400	1.52439e-09	47400	8.19274e-09	80160	938660	50717	4.28111e-06	61560	84509.3	49650	9.1734e-11	61096	0.000360115	57263	0.40565	57263	0.118581	96900	5.96852e+06	47014	0.208706	88200
	40311	27148.6	83820	71978.7	83820	73313.9	83820	316852	54016	309519	86960	47559.6	86960	398346	43529	0.00020237	43529	7.44748e-13	62960	143832	46425	8.96103e-08	64340	45847.9	64340	277693	47430	1.59637e-09	47430	8.53949e-09	80190	943606	50747	4.44835e-06	61590	85200.4	49670	9.52792e-11	61116	0.00036495	57283	0.408867	57283	0.119659	96920	5.98352e+06	47034	0.211167	88220
	40331	27362.1	83840	72322.1	83840	73640	83840	318347	54036	312687	86980	47927.6	86980	400395	43549	0.000208359	43549	8.44899e-13	62980	144732	46445	9.2743e-08	64360	46044.5	64360	279456	47460	1.67158e-09	47460	8.90013e-09	80220	948575	50777	4.62175e-06	61620	85896.4	49690	9.89544e-11	61136	0.000369846	57303	0.412107	57303	0.120745	96940	5.99855e+06	47054	0.213654	88240
	40351	27576.9	83860	72667	83860	73967.4	83860	319849	54056	315884	87000	48298.2	87000	402453	43569	0.000214514	43569	9.53752e-13	63000	145638	46465	9.59791e-08	64380	46241.7	64380	281228	47490	1.75014e-09	47490	9.2752e-09	80250	953568	50807	4.80153e-06	61650	86597.5	49710	1.02764e-10	61156	0.000374804	57323	0.415371	57323	0.121841	96960	6.01362e+06	47074	0.216168	88260
	40371	27793.3	83880	73013.3	83880	74296.1	83880	321357	54076	319111	87020	48671.5	87020	404521	43589	0.000220839	43589	1.08155e-12	63020	146549	46485	9.93216e-08	64400	46439.7	64400	283011	47520	1.8322e-09	47520	9.66523e-09	80280	958583	50837	4.98791e-06	61680	87303.7	49730	1.06713e-10	61176	0.000379825	57343	0.418659	57343	0.122946	96980	6.02872e+06	47094	0.21871	88280
	40391	28011.2	83900	73361.1	83900	74626.1	83900	322871	54096	322368	87040	49047.5	87040	406599	43609	0.000227337	43609	1.22162e-12	63040	147465	46505	1.02774e-07	64420	46638.4	64420	284804	47550	1.91791e-09	47550	1.00708e-08	80310	963621	50867	5.18112e-06	61710	88015	49750	1.10807e-10	61196	0.000384909	57363	0.42197	57363	0.124061	97000	6.04385e+06	47114	0.22128	88300
	40411	28230.5	83920	73710.4	83920	74957.5	83920	324392	54116	325656	87060	49426.2	87060	408686	43629	0.000234014	43629	1.36106e-12	63060	148386	46525	1.0634e-07	64440	46837.8	64440	286608	47580	2.00742e-09	47580	1.04925e-08	80340	968683	50897	5.38138e-06	61740	88731.5	49770	1.15049e-10	61216	0.000390057	57383	0.425306	57383	0.125184	97020	6.05901e+06	47134	0.223877	88320
	40431	28451.4	83940	74061.2	83940	75290.1	83940	325919	54136	328975	87080	49807.6	87080	410783	43649	0.000240874	43649	1.53701e-12	63080	149312	46545	1.10022e-07	64460	47038	64460	288421	47610	2.10088e-09	47610	1.09309e-08	80370	973768	50927	5.58896e-06	61770	89453.1	49790	1.19446e-10	61236	0.00039527	57403	0.428665	57403	0.126317	97040	6.0742e+06	47154	0.226503	88340
	40451	28673.8	83960	74413.5	83960	75624	83960	327453	54156	332325	87100	50191.7	87100	412890	43669	0.000247921	43669	1.72757e-12	63100	150243	46565	1.13824e-07	64480	47238.9	64480	290245	47640	2.19848e-09	47640	1.13866e-08	80400	978876	50957	5.80408e-06	61800	90179.9	49810	1.24002e-10	61256	0.00040055	57423	0.432049	57423	0.12746	97060	6.08943e+06	47174	0.229157	88360
	40471	28897.7	83980	74767.3	83980	75959.3	83980	328993	54176	335706	87120	50578.6	87120	415006	43689	0.00025516	43689	1.91664e-12	63120	151179	46585	1.17751e-07	64500	47440.6	64500	292080	47670	2.30036e-09	47670	1.18603e-08	80430	984008	50987	6.02703e-06	61830	90911.9	49830	1.28723e-10	61276	0.000405895	57443	0.435457	57443	0.128612	97080	6.10469e+06	47194	0.23184	88380
	40491	29123.2	84000	75122.6	84000	76295.9	84000	330540	54196	339119	87140	50968.2	87140	417133	43709	0.000262597	43709	2.15128e-12	63140	152121	46605	1.21805e-07	64520	47643	64520	293925	47700	2.40672e-09	47700	1.23527e-08	80460	989163	51017	6.25805e-06	61860	91649.2	49850	1.33615e-10	61296	0.000411308	57463	0.438891	57463	0.129774	97100	6.11999e+06	47214	0.234553	88400
	40511	29350.1	84020	75479.4	84020	76633.8	84020	332093	54216	342564	87160	51360.7	87160	419269	43729	0.000270236	43729	2.40743e-12	63160	153068	46625	1.25991e-07	64540	47846.2	64540	295780	47730	2.51775e-09	47730	1.28645e-08	80490	994342	51047	6.49742e-06	61890	92391.8	49870	1.38684e-10	61316	0.000416789	57483	0.442348	57483	0.130945	97120	6.13531e+06	47234	0.237294	88420
	40531	29578.7	84040	75837.7	84040	76973.1	84040	333653	54236	346041	87180	51756	87180	421415	43749	0.000278082	43749	2.65637e-12	63180	154020	46645	1.30313e-07	64560	48050.1	64560	297646	47760	2.63362e-09	47760	1.33963e-08	80520	999545	51077	6.74544e-06	61920	93139.8	49890	1.43935e-10	61336	0.000422339	57503	0.445831	57503	0.132126	97140	6.15068e+06	47254	0.240065	88440
	40551	29808.8	84060	76197.6	84060	77313.6	84060	335219	54256	349551	87200	52154	87200	423572	43769	0.00028614	43769	2.97133e-12	63200	154977	46665	1.34774e-07	64580	48254.8	64580	299522	47790	2.75456e-09	47790	1.39489e-08	80550	1.00477e+06	51107	7.00239e-06	61950	93893.1	49910	1.49374e-10	61356	0.000427959	57523	0.449339	57523	0.133318	97160	6.16607e+06	47274	0.242867	88460
	40571	30040.5	84080	76559	84080	77655.6	84080	336792	54276	353093	87220	52555	87220	425738	43789	0.000294417	43789	3.30903e-12	63220	155940	46685	1.3938e-07	64600	48460.2	64600	301410	47820	2.88075e-09	47820	1.45231e-08	80580	1.01002e+06	51137	7.26858e-06	61980	94651.8	49930	1.5501e-10	61376	0.000433649	57543	0.452873	57543	0.134519	97180	6.18149e+06	47294	0.245698	88480
	40591	30273.7	84100	76921.9	84100	77998.9	84100	338372	54296	356668	87240	52958.8	87240	427914	43809	0.000302916	43809	3.641e-12	63240	156908	46705	1.44134e-07	64620	48666.4	64620	303308	47850	3.01242e-09	47850	1.51198e-08	80610	1.0153e+06	51167	7.54431e-06	62010	95415.9	49950	1.60847e-10	61396	0.000439411	57563	0.456431	57563	0.13573	97200	6.19695e+06	47314	0.248561	88500
	40611	30508.5	84120	77286.4	84120	78343.5	84120	339958	54316	360277	87260	53365.5	87260	430101	43829	0.000311644	43829	4.05424e-12	63260	157881	46725	1.49041e-07	64640	48873.3	64640	305216	47880	3.1498e-09	47880	1.57396e-08	80640	1.0206e+06	51197	7.82992e-06	62040	96185.5	49970	1.66892e-10	61416	0.000445245	57583	0.460016	57583	0.136951	97220	6.21245e+06	47334	0.251454	88520
	40631	30745	84140	77652.4	84140	78689.5	84140	341551	54336	363919	87280	53775.1	87280	432297	43849	0.000320607	43849	4.49206e-12	63280	158860	46745	1.54106e-07	64660	49081	64660	307136	47910	3.29312e-09	47910	1.63834e-08	80670	1.02592e+06	51227	8.12572e-06	62070	96960.7	49990	1.73154e-10	61436	0.000451152	57603	0.463626	57603	0.138182	97240	6.22797e+06	47354	0.254378	88540
	40651	30983	84160	78020	84160	79036.8	84160	343151	54356	367595	87300	54187.6	87300	434504	43869	0.000329811	43869	4.92944e-12	63300	159844	46765	1.59333e-07	64680	49289.5	64680	309066	47940	3.44261e-09	47940	1.70523e-08	80700	1.03127e+06	51257	8.43207e-06	62100	97741.3	50010	1.79639e-10	61456	0.000457132	57623	0.467262	57623	0.139424	97260	6.24353e+06	47374	0.257334	88560
	40671	31222.7	84180	78389.1	84180	79385.6	84180	344757	54376	371305	87320	54603.1	87320	436721	43889	0.000339261	43889	5.46165e-12	63320	160834	46785	1.64727e-07	64700	49498.7	64700	311008	47970	3.59854e-09	47970	1.77469e-08	80730	1.03664e+06	51287	8.74932e-06	62130	98527.5	50030	1.86354e-10	61476	0.000463188	57643	0.470925	57643	0.140675	97280	6.25913e+06	47394	0.260321	88580
	40691	31464	84200	78759.8	84200	79735.6	84200	346370	54396	375049	87340	55021.5	87340	438948	43909	0.000348963	43909	6.03368e-12	63340	161829	46805	1.70294e-07	64720	49708.7	64720	312960	48000	3.76117e-09	48000	1.84684e-08	80760	1.04203e+06	51317	9.07783e-06	62160	99319.3	50050	1.93308e-10	61496	0.00046932	57663	0.474614	57663	0.141938	97300	6.27475e+06	47414	0.263341	88600
	40711	31706.9	84220	79132.1	84220	80087.1	84220	347990	54416	378828	87360	55442.9	87360	441186	43929	0.000358924	43929	6.60494e-12	63360	162829	46825	1.76038e-07	64740	49919.4	64740	314924	48030	3.93075e-09	48030	1.92176e-08	80790	1.04746e+06	51347	9.41798e-06	62190	100117	50070	2.00509e-10	61516	0.000475528	57683	0.478329	57683	0.14321	97320	6.29041e+06	47434	0.266393	88620
	40731	31951.5	84240	79505.9	84240	80440	84240	349616	54436	382643	87380	55867.4	87380	443434	43949	0.00036915	43949	7.28799e-12	63380	163836	46845	1.81965e-07	64760	50131	64760	316898	48060	4.10759e-09	48060	1.99956e-08	80820	1.0529e+06	51377	9.77016e-06	62220	100920	50090	2.07964e-10	61536	0.000481813	57703	0.482071	57703	0.144494	97340	6.30611e+06	47454	0.269478	88640
	40751	32197.7	84260	79881.4	84260	80794.2	84260	351250	54456	386492	87400	56294.8	87400	445692	43969	0.000379648	43969	8.02041e-12	63400	164847	46865	1.8808e-07	64780	50343.3	64780	318884	48090	4.29196e-09	48090	2.08035e-08	80850	1.05837e+06	51407	1.01348e-05	62250	101729	50110	2.15682e-10	61556	0.000488177	57723	0.485839	57723	0.145787	97360	6.32183e+06	47474	0.272596	88660
	40771	32445.6	84280	80258.4	84280	81149.8	84280	352890	54476	390377	87420	56725.3	87420	447961	43989	0.000390425	43989	8.76419e-12	63420	165864	46885	1.9439e-07	64800	50556.4	64800	320881	48120	4.48418e-09	48120	2.16422e-08	80880	1.06387e+06	51437	1.05122e-05	62280	102543	50130	2.23673e-10	61576	0.00049462	57743	0.489635	57743	0.147092	97380	6.33759e+06	47494	0.275748	88680
	40791	32695.1	84300	80637	84300	81506.8	84300	354537	54496	394298	87440	57158.8	87440	450240	44009	0.000401487	44009	9.63557e-12	63440	166887	46905	2.00899e-07	64820	50770.3	64820	322889	48150	4.68456e-09	48150	2.2513e-08	80910	1.06939e+06	51467	1.09029e-05	62310	103364	50150	2.31944e-10	61596	0.000501143	57763	0.493458	57763	0.148407	97400	6.35339e+06	47514	0.278933	88700
	40811	32946.4	84320	81017.2	84320	81865.2	84320	356191	54516	398255	87460	57595.4	87460	452530	44029	0.000412841	44029	1.05731e-11	63460	167916	46925	2.07613e-07	64840	50984.9	64840	324909	48180	4.89343e-09	48180	2.34169e-08	80940	1.07493e+06	51497	1.13073e-05	62340	104190	50170	2.40507e-10	61616	0.000507748	57783	0.497308	57783	0.149734	97420	6.36922e+06	47534	0.282152	88720
	40831	33199.3	84340	81399.1	84340	82225.1	84340	357852	54536	402249	87480	58035.2	87480	454831	44049	0.000424495	44049	1.15277e-11	63480	168950	46945	2.14539e-07	64860	51200.4	64860	326940	48210	5.11112e-09	48210	2.43552e-08	80970	1.0805e+06	51527	1.17259e-05	62370	105022	50190	2.49369e-10	61636	0.000514435	57803	0.501186	57803	0.151071	97440	6.38508e+06	47554	0.285406	88740
	40851	33453.9	84360	81782.5	84360	82586.3	84360	359520	54556	406280	87500	58478	87500	457142	44069	0.000436455	44069	1.26292e-11	63500	169989	46965	2.21684e-07	64880	51416.6	64880	328982	48240	5.33799e-09	48240	2.53291e-08	81000	1.0861e+06	51557	1.2159e-05	62400	105860	50210	2.58542e-10	61656	0.000521204	57823	0.505092	57823	0.152419	97460	6.40098e+06	47574	0.288694	88760
	40871	33710.3	84380	82167.6	84380	82948.9	84380	361195	54576	410347	87520	58924	87520	459463	44089	0.00044873	44089	1.38215e-11	63520	171035	46985	2.29053e-07	64900	51633.6	64900	331036	48270	5.57441e-09	48270	2.63399e-08	81030	1.09172e+06	51587	1.26073e-05	62430	106704	50230	2.68035e-10	61676	0.000528058	57843	0.509025	57843	0.153779	97480	6.41691e+06	47594	0.292018	88780
	40891	33968.3	84400	82554.3	84400	83313	84400	362877	54596	414452	87540	59373.1	87540	461796	44109	0.000461327	44109	1.50451e-11	63540	172086	47005	2.36653e-07	64920	51851.4	64920	333102	48300	5.82075e-09	48300	2.73889e-08	81060	1.09737e+06	51617	1.30712e-05	62460	107553	50250	2.7786e-10	61696	0.000534997	57863	0.512987	57863	0.155149	97500	6.43287e+06	47614	0.295377	88800
	40911	34228.1	84420	82942.6	84420	83678.5	84420	364566	54616	418595	87560	59825.5	87560	464139	44129	0.000474253	44129	1.64336e-11	63560	173143	47025	2.44491e-07	64940	52070	64940	335179	48330	6.07741e-09	48330	2.84774e-08	81090	1.10304e+06	51647	1.35512e-05	62490	108409	50270	2.88026e-10	61716	0.000542022	57883	0.516977	57883	0.156531	97520	6.44887e+06	47634	0.298772	88820
	40931	34489.7	84440	83332.6	84440	84045.4	84440	366262	54636	422776	87580	60281	87580	466493	44149	0.000487518	44149	1.79437e-11	63580	174206	47045	2.52573e-07	64960	52289.4	64960	337268	48360	6.34479e-09	48360	2.96069e-08	81120	1.10874e+06	51677	1.40478e-05	62520	109271	50290	2.98546e-10	61736	0.000549134	57903	0.520995	57903	0.157924	97540	6.46491e+06	47654	0.302203	88840
	40951	34753	84460	83724.2	84460	84413.7	84460	367965	54656	426995	87600	60739.8	87600	468858	44169	0.000501129	44169	1.94966e-11	63600	175274	47065	2.60908e-07	64980	52509.7	64980	339368	48390	6.62333e-09	48390	3.07788e-08	81150	1.11446e+06	51707	1.45616e-05	62550	110139	50310	3.09431e-10	61756	0.000556334	57923	0.525042	57923	0.159329	97560	6.48097e+06	47674	0.30567	88860
	40971	35018	84480	84117.4	84480	84783.5	84480	369675	54676	431253	87620	61201.8	87620	471233	44189	0.000515094	44189	2.12415e-11	63620	176349	47085	2.69503e-07	65000	52730.7	65000	341481	48420	6.91345e-09	48420	3.19946e-08	81180	1.12021e+06	51737	1.50931e-05	62580	111013	50330	3.20693e-10	61776	0.000563623	57943	0.529117	57943	0.160745	97580	6.49708e+06	47694	0.309175	88880
	40991	35284.9	84500	84512.3	84500	85154.7	84500	371392	54696	435550	87640	61667.1	87640	473620	44209	0.000529421	44209	2.31407e-11	63640	177429	47105	2.78365e-07	65020	52952.5	65020	343605	48450	7.21563e-09	48450	3.32559e-08	81210	1.12599e+06	51767	1.56429e-05	62610	111893	50350	3.32344e-10	61796	0.000571002	57963	0.533222	57963	0.162173	97600	6.51321e+06	47714	0.312716	88900
	41011	35553.5	84520	84908.9	84520	85527.4	84520	373116	54716	439887	87660	62135.7	87660	476018	44229	0.000544121	44229	2.51068e-11	63660	178515	47125	2.87501e-07	65040	53175.1	65040	345741	48480	7.53032e-09	48480	3.45643e-08	81240	1.13179e+06	51797	1.62116e-05	62640	112779	50370	3.44398e-10	61816	0.000578472	57983	0.537356	57983	0.163613	97620	6.52938e+06	47734	0.316295	88920
	41031	35823.9	84540	85307.1	84540	85901.5	84540	374848	54736	444263	87680	62607.5	87680	478426	44249	0.000559202	44249	2.72892e-11	63680	179607	47145	2.96921e-07	65060	53398.5	65060	347889	48510	7.85802e-09	48510	3.59214e-08	81270	1.13762e+06	51827	1.67998e-05	62670	113672	50390	3.56866e-10	61836	0.000586034	58003	0.541519	58003	0.165064	97640	6.54559e+06	47754	0.319912	88940
	41051	36096.1	84560	85707.1	84560	86277.1	84560	376587	54756	448679	87700	63082.8	87700	480846	44269	0.000574672	44269	2.96602e-11	63700	180705	47165	3.06632e-07	65080	53622.8	65080	350049	48540	8.19923e-09	48540	3.73289e-08	81300	1.14347e+06	51857	1.74081e-05	62700	114571	50410	3.69764e-10	61856	0.00059369	58023	0.545712	58023	0.166528	97660	6.56183e+06	47774	0.323568	88960
	41071	36370.1	84580	86108.7	84580	86654.2	84580	378333	54776	453135	87720	63561.3	87720	483277	44289	0.000590541	44289	3.21378e-11	63720	181809	47185	3.16643e-07	65100	53847.8	65100	352221	48570	8.55449e-09	48570	3.87887e-08	81330	1.14935e+06	51887	1.80373e-05	62730	115476	50430	3.83105e-10	61876	0.00060144	58043	0.549935	58043	0.168003	97680	6.5781e+06	47794	0.327262	88980
	41091	36646	84600	86511.9	84600	87032.7	84600	380086	54796	457632	87740	64043.3	87740	485718	44309	0.00060682	44309	3.48414e-11	63740	182919	47205	3.26962e-07	65120	54073.7	65120	354406	48600	8.92434e-09	48600	4.03026e-08	81360	1.15526e+06	51917	1.86879e-05	62760	116387	50450	3.96902e-10	61896	0.000609285	58063	0.554187	58063	0.169491	97700	6.59441e+06	47814	0.330995	89000
	41111	36923.6	84620	86916.9	84620	87412.7	84620	381846	54816	462170	87760	64528.6	87760	488172	44329	0.000623517	44329	3.7798e-11	63760	184036	47225	3.37599e-07	65140	54300.4	65140	356602	48630	9.30935e-09	48630	4.18724e-08	81390	1.16119e+06	51947	1.93606e-05	62790	117305	50470	4.11172e-10	61916	0.000617227	58083	0.55847	58083	0.17099	97720	6.61076e+06	47834	0.334767	89020
	41131	37203.2	84640	87323.6	84640	87794.1	84640	383614	54836	466749	87780	65017.4	87780	490636	44349	0.000640642	44349	4.08941e-11	63780	185158	47245	3.48562e-07	65160	54527.9	65160	358811	48660	9.7101e-09	48660	4.35e-08	81420	1.16716e+06	51977	2.00562e-05	62820	118229	50490	4.2593e-10	61936	0.000625267	58103	0.562783	58103	0.172502	97740	6.62714e+06	47854	0.33858	89040
	41151	37484.5	84660	87732	84660	88177.1	84660	385389	54856	471370	87800	65509.6	87800	493112	44369	0.000658206	44369	4.42575e-11	63800	186286	47265	3.59861e-07	65180	54756.2	65180	361033	48690	1.01272e-08	48690	4.51876e-08	81450	1.17314e+06	52007	2.07753e-05	62850	119160	50510	4.4119e-10	61956	0.000633405	58123	0.567126	58123	0.174027	97760	6.64355e+06	47874	0.342432	89060
	41171	37767.8	84680	88142.1	84680	88561.5	84680	387172	54876	476033	87820	66005.2	87820	495599	44389	0.000676219	44389	4.79156e-11	63820	187420	47285	3.71505e-07	65200	54985.4	65200	363266	48720	1.05613e-08	48720	4.69372e-08	81480	1.17916e+06	52037	2.15188e-05	62880	120097	50530	4.56971e-10	61976	0.000641643	58143	0.571501	58143	0.175563	97780	6.66e+06	47894	0.346325	89080
	41191	38052.9	84700	88553.9	84700	88947.4	84700	388962	54896	480739	87840	66504.4	87840	498097	44409	0.000694692	44409	5.17676e-11	63840	188561	47305	3.83506e-07	65220	55215.4	65220	365512	48750	1.1013e-08	48750	4.87509e-08	81510	1.1852e+06	52067	2.22874e-05	62910	121040	50550	4.73287e-10	61996	0.000649983	58163	0.575906	58163	0.177112	97800	6.67648e+06	47914	0.35026	89100
	41211	38339.9	84720	88967.4	84720	89334.9	84720	390759	54916	485487	87860	67007.1	87860	500607	44429	0.000713636	44429	5.59101e-11	63860	189708	47325	3.95872e-07	65240	55446.2	65240	367771	48780	1.14831e-08	48780	5.0631e-08	81540	1.19127e+06	52097	2.30819e-05	62940	121990	50570	4.90157e-10	62016	0.000658424	58183	0.580342	58183	0.178674	97820	6.693e+06	47934	0.354235	89120
	41231	38628.8	84740	89382.7	84740	89723.8	84740	392564	54936	490279	87880	67513.3	87880	503128	44449	0.000733062	44449	6.04298e-11	63880	190861	47345	4.08614e-07	65260	55677.9	65260	370042	48810	1.19721e-08	48810	5.25797e-08	81570	1.19736e+06	52127	2.39031e-05	62970	122947	50590	5.07598e-10	62036	0.000666969	58203	0.58481	58203	0.180249	97840	6.70956e+06	47954	0.358252	89140
	41251	38919.6	84760	89799.7	84760	90114.2	84760	394376	54956	495113	87900	68023	87900	505661	44469	0.000752981	44469	6.51997e-11	63900	192020	47365	4.21744e-07	65280	55910.4	65280	372326	48840	1.24809e-08	48840	5.45994e-08	81600	1.20348e+06	52157	2.47519e-05	63000	123911	50610	5.25629e-10	62056	0.000675619	58223	0.589309	58223	0.181836	97860	6.72615e+06	47974	0.362312	89160
	41271	39212.3	84780	90218.4	84780	90506.2	84780	396196	54976	499992	87920	68536.4	87920	508206	44489	0.000773405	44489	7.02902e-11	63920	193185	47385	4.35271e-07	65300	56143.7	65300	374622	48870	1.30102e-08	48870	5.66926e-08	81630	1.20964e+06	52187	2.56291e-05	63030	124881	50630	5.44269e-10	62076	0.000684374	58243	0.59384	58243	0.183437	97880	6.74277e+06	47994	0.366414	89180
	41291	39506.9	84800	90638.9	84800	90899.7	84800	398023	54996	504915	87940	69053.3	87940	510762	44509	0.000794345	44509	7.58533e-11	63940	194357	47405	4.49209e-07	65320	56377.9	65320	376932	48900	1.35608e-08	48900	5.88618e-08	81660	1.21581e+06	52217	2.65356e-05	63060	125858	50650	5.63537e-10	62096	0.000693237	58263	0.598403	58263	0.18505	97900	6.75943e+06	48014	0.370559	89200
	41311	39803.5	84820	91061.2	84820	91294.6	84820	399858	55016	509882	87960	69573.8	87960	513329	44529	0.000815815	44529	8.17076e-11	63960	195535	47425	4.63567e-07	65340	56612.9	65340	379254	48930	1.41334e-08	48930	6.11095e-08	81690	1.22202e+06	52247	2.74724e-05	63090	126841	50670	5.83453e-10	62116	0.000702207	58283	0.602998	58283	0.186677	97920	6.77613e+06	48034	0.374748	89220
	41331	40102.1	84840	91485.2	84840	91691.2	84840	401701	55036	514894	87980	70098.1	87980	515909	44549	0.000837826	44549	8.79604e-11	63980	196720	47445	4.78359e-07	65360	56848.8	65360	381589	48960	1.4729e-08	48960	6.34385e-08	81720	1.22825e+06	52277	2.84404e-05	63120	127832	50690	6.04038e-10	62136	0.000711287	58303	0.607625	58303	0.188316	97940	6.79286e+06	48054	0.37898	89240
	41351	40402.6	84860	91911	84860	92089.2	84860	403551	55056	519951	88000	70625.9	88000	518500	44569	0.00086039	44569	9.4774e-11	64000	197910	47465	4.93596e-07	65380	57085.5	65380	383937	48990	1.53484e-08	48990	6.58516e-08	81750	1.23451e+06	52307	2.94406e-05	63150	128829	50710	6.25312e-10	62156	0.000720478	58323	0.612285	58323	0.189969	97960	6.80962e+06	48074	0.383257	89260
	41371	40705	84880	92338.5	84880	92488.8	84880	405409	55076	525055	88020	71157.5	88020	521103	44589	0.000883522	44589	1.01964e-10	64020	199108	47485	5.09291e-07	65400	57323.1	65400	386298	49020	1.59924e-08	49020	6.83515e-08	81780	1.2408e+06	52337	3.04739e-05	63180	129833	50730	6.47299e-10	62176	0.000729781	58343	0.616977	58343	0.191636	97980	6.82643e+06	48094	0.387578	89280
	41391	41009.5	84900	92767.9	84900	92889.9	84900	407274	55096	530204	88040	71692.8	88040	523718	44609	0.000907234	44609	1.09599e-10	64040	200311	47505	5.25457e-07	65420	57561.5	65420	388672	49050	1.66621e-08	49050	7.09413e-08	81810	1.24712e+06	52367	3.15415e-05	63210	130844	50750	6.70021e-10	62196	0.000739197	58363	0.621703	58363	0.193316	98000	6.84326e+06	48114	0.391944	89300
	41411	41315.9	84920	93199	84920	93292.6	84920	409147	55116	535399	88060	72231.8	88060	526345	44629	0.000931539	44629	1.17921e-10	64060	201522	47525	5.42108e-07	65440	57800.8	65440	391059	49080	1.73583e-08	49080	7.36241e-08	81840	1.25346e+06	52397	3.26443e-05	63240	131862	50770	6.935e-10	62216	0.000748728	58383	0.626461	58383	0.195009	98020	6.86014e+06	48134	0.396356	89320
	41431	41624.4	84940	93631.9	84940	93696.9	84940	411028	55136	540641	88080	72774.7	88080	528983	44649	0.000956452	44649	1.26693e-10	64080	202738	47545	5.59256e-07	65460	58040.9	65460	393460	49110	1.80822e-08	49110	7.64028e-08	81870	1.25984e+06	52427	3.37836e-05	63270	132887	50790	7.17761e-10	62236	0.000758375	58403	0.631253	58403	0.196717	98040	6.87705e+06	48154	0.400814	89340
	41451	41934.9	84960	94066.7	84960	94102.7	84960	412916	55156	545931	88100	73321.3	88100	531634	44669	0.000981986	44669	1.36001e-10	64100	203962	47565	5.76916e-07	65480	58281.9	65480	395873	49140	1.88346e-08	49140	7.92809e-08	81900	1.26624e+06	52457	3.49603e-05	63300	133919	50810	7.42829e-10	62256	0.000768139	58423	0.636079	58423	0.198438	98060	6.89399e+06	48174	0.405319	89360
	41471	42247.4	84980	94503.2	84980	94510	84980	414812	55176	551268	88120	73871.7	88120	534297	44689	0.00100816	44689	1.46125e-10	64120	205192	47585	5.95103e-07	65500	58523.8	65500	398300	49170	1.96167e-08	49170	8.22616e-08	81930	1.27267e+06	52487	3.61757e-05	63330	134958	50830	7.68729e-10	62276	0.000778021	58443	0.640938	58443	0.200173	98080	6.91097e+06	48194	0.40987	89380
	41491	42561.9	85000	94941.6	85000	94919	85000	416717	55196	556652	88140	74425.9	88140	536972	44709	0.00103498	44709	1.56799e-10	64140	206428	47605	6.13831e-07	65520	58766.5	65520	400741	49200	2.04296e-08	49200	8.53484e-08	81960	1.27913e+06	52517	3.7431e-05	63360	136004	50850	7.95487e-10	62296	0.000788024	58463	0.645832	58463	0.201922	98100	6.92799e+06	48214	0.414468	89400
	41511	42878.5	85020	95381.7	85020	95329.5	85020	418628	55216	562086	88160	74984	88160	539659	44729	0.00106246	44729	1.68115e-10	64160	207671	47625	6.33116e-07	65540	59010.1	65540	403195	49230	2.12744e-08	49230	8.85449e-08	81990	1.28562e+06	52547	3.87273e-05	63390	137058	50870	8.2313e-10	62316	0.000798147	58483	0.650759	58483	0.203685	98120	6.94504e+06	48234	0.419115	89420
	41531	43197.1	85040	95823.8	85040	95741.5	85040	420548	55236	567567	88180	75546.1	88180	542358	44749	0.00109063	44749	1.80372e-10	64180	208921	47645	6.52972e-07	65560	59254.6	65560	405662	49260	2.21524e-08	49260	9.18547e-08	82020	1.29213e+06	52577	4.0066e-05	63420	138119	50890	8.51686e-10	62336	0.000808394	58503	0.655722	58503	0.205462	98140	6.96213e+06	48254	0.423809	89440
	41551	43517.8	85060	96267.6	85060	96155.2	85060	422476	55256	573098	88200	76112	88200	545069	44769	0.00111949	44769	1.9332e-10	64200	210177	47665	6.73416e-07	65580	59500	65580	408144	49290	2.30647e-08	49290	9.52816e-08	82050	1.29868e+06	52607	4.14484e-05	63450	139186	50910	8.81184e-10	62356	0.000818764	58523	0.660718	58523	0.207254	98160	6.97926e+06	48274	0.428552	89460
	41571	43840.7	85080	96713.3	85080	96570.5	85080	424411	55276	578679	88220	76681.9	88220	547793	44789	0.00114907	44789	2.07037e-10	64220	211441	47685	6.94464e-07	65600	59746.2	65600	410638	49320	2.40126e-08	49320	9.88296e-08	82080	1.30525e+06	52637	4.28758e-05	63480	140262	50930	9.11652e-10	62376	0.00082926	58543	0.66575	58543	0.20906	98180	6.99642e+06	48294	0.433345	89480
	41591	44165.6	85100	97160.8	85100	96987.3	85100	426355	55296	584309	88240	77255.7	88240	550529	44809	0.00117938	44809	2.2185e-10	64240	212711	47705	7.16133e-07	65620	59993.3	65620	413147	49350	2.49974e-08	49350	1.02503e-07	82110	1.31185e+06	52667	4.43495e-05	63510	141344	50950	9.43121e-10	62396	0.000839883	58563	0.670817	58563	0.210881	98200	7.01361e+06	48314	0.438187	89500
	41611	44492.6	85120	97610.2	85120	97405.8	85120	428306	55316	589990	88260	77833.5	88260	553278	44829	0.00121043	44829	2.37504e-10	64260	213987	47725	7.3844e-07	65640	60241.3	65640	415669	49380	2.60205e-08	49380	1.06305e-07	82140	1.31849e+06	52697	4.5871e-05	63540	142434	50970	9.75623e-10	62416	0.000850634	58583	0.675919	58583	0.212716	98220	7.03085e+06	48334	0.443079	89520
	41631	44821.7	85140	98061.4	85140	97825.9	85140	430266	55336	595721	88280	78415.4	88280	556039	44849	0.00124224	44849	2.54077e-10	64280	215271	47745	7.61403e-07	65660	60490.2	65660	418206	49410	2.70833e-08	49410	1.10241e-07	82170	1.32515e+06	52727	4.74418e-05	63570	143532	50990	1.00919e-09	62436	0.000861514	58603	0.681056	58603	0.214566	98240	7.04812e+06	48354	0.448021	89540
	41651	45153	85160	98514.6	85160	98247.6	85160	432234	55356	601504	88300	79001.3	88300	558813	44869	0.00127483	44869	2.71907e-10	64300	216561	47765	7.85041e-07	65680	60740	65680	420756	49440	2.81873e-08	49440	1.14315e-07	82200	1.33184e+06	52757	4.90633e-05	63600	144637	51010	1.04385e-09	62456	0.000872527	58623	0.68623	58623	0.216431	98260	7.06543e+06	48374	0.453015	89560
	41671	45486.4	85180	98969.6	85180	98670.9	85180	434209	55376	607338	88320	79591.2	88320	561599	44889	0.00130822	44889	2.90774e-10	64320	217859	47785	8.09371e-07	65700	60990.6	65700	423320	49470	2.93339e-08	49470	1.18531e-07	82230	1.33856e+06	52787	5.0737e-05	63630	145749	51030	1.07965e-09	62476	0.000883671	58643	0.691439	58643	0.218311	98280	7.08277e+06	48394	0.45806	89580
	41691	45821.9	85200	99426.4	85200	99095.8	85200	436193	55396	613224	88340	80185.3	88340	564397	44909	0.00134243	44909	3.10728e-10	64340	219163	47805	8.34412e-07	65720	61242.2	65720	425898	49500	3.05247e-08	49500	1.22894e-07	82260	1.34531e+06	52817	5.24647e-05	63660	146869	51050	1.11661e-09	62496	0.00089495	58663	0.696685	58663	0.220206	98300	7.10015e+06	48414	0.463157	89600
	41711	46159.7	85220	99885.2	85220	99522.3	85220	438185	55416	619163	88360	80783.4	88360	567209	44929	0.00137747	44929	3.32144e-10	64360	220474	47825	8.60185e-07	65740	61494.6	65740	428491	49530	3.17614e-08	49530	1.2741e-07	82290	1.35209e+06	52847	5.42478e-05	63690	147996	51070	1.15478e-09	62516	0.000906365	58683	0.701967	58683	0.222117	98320	7.11757e+06	48434	0.468307	89620
	41731	46499.6	85240	100346	85240	99950.5	85240	440185	55436	625154	88380	81385.8	88380	570033	44949	0.00141337	44949	3.54827e-10	64380	221792	47845	8.8671e-07	65760	61748	65760	431097	49560	3.30455e-08	49560	1.32083e-07	82320	1.3589e+06	52877	5.60881e-05	63720	149132	51090	1.19418e-09	62536	0.000917917	58703	0.707286	58703	0.224042	98340	7.13502e+06	48454	0.47351	89640
	41751	46841.7	85260	100808	85260	100380	85260	442193	55456	631198	88400	81992.3	88400	572869	44969	0.00145013	44969	3.78782e-10	64400	223117	47865	9.14006e-07	65780	62002.2	65780	433718	49590	3.43789e-08	49590	1.36918e-07	82350	1.36574e+06	52907	5.79873e-05	63750	150275	51110	1.23486e-09	62556	0.000929608	58723	0.712642	58723	0.225983	98360	7.15251e+06	48474	0.478766	89660
	41771	47186	85280	101273	85280	100812	85280	444209	55476	637297	88420	82602.9	88420	575719	44989	0.00148779	44989	4.04429e-10	64420	224450	47885	9.42096e-07	65800	62257.4	65800	436354	49620	3.57632e-08	49620	1.4192e-07	82380	1.37261e+06	52937	5.99472e-05	63780	151425	51130	1.27686e-09	62576	0.00094144	58743	0.718034	58743	0.22794	98380	7.17004e+06	48494	0.484076	89680
	41791	47532.5	85300	101739	85300	101245	85300	446234	55496	643449	88440	83217.9	88440	578581	45009	0.00152636	45009	4.31616e-10	64440	225789	47905	9.71e-07	65820	62513.5	65820	439003	49650	3.72004e-08	49650	1.47096e-07	82410	1.37952e+06	52967	6.19695e-05	63810	152584	51150	1.32022e-09	62596	0.000953413	58763	0.723465	58763	0.229912	98400	7.1876e+06	48514	0.489441	89700
	41811	47881.2	85320	102208	85320	101680	85320	448267	55516	649656	88460	83837	88460	581457	45029	0.00156587	45029	4.60303e-10	64460	227136	47925	1.00074e-06	65840	62770.4	65840	441667	49680	3.86923e-08	49680	1.5245e-07	82440	1.38645e+06	52997	6.40562e-05	63840	153750	51170	1.36498e-09	62616	0.00096553	58783	0.728933	58783	0.2319	98420	7.2052e+06	48534	0.49486	89720
	41831	48232.2	85340	102678	85340	102116	85340	450308	55536	655917	88480	84460.5	88480	584345	45049	0.00160632	45049	4.90948e-10	64480	228489	47945	1.03134e-06	65860	63028.3	65860	444346	49710	4.02409e-08	49710	1.57989e-07	82470	1.39341e+06	53027	6.62091e-05	63870	154924	51190	1.41118e-09	62636	0.000977792	58803	0.734438	58803	0.233903	98440	7.22284e+06	48554	0.500336	89740
	41851	48585.4	85360	103150	85360	102554	85360	452357	55556	662235	88500	85088.3	88500	587247	45069	0.00164776	45069	5.23452e-10	64500	229850	47965	1.06283e-06	65880	63287.1	65880	447040	49740	4.18483e-08	49740	1.63718e-07	82500	1.4004e+06	53057	6.84304e-05	63900	156106	51210	1.45886e-09	62656	0.000990201	58823	0.739982	58823	0.235923	98460	7.24051e+06	48574	0.505867	89760
	41871	48940.9	85380	103624	85380	102994	85380	454415	55576	668608	88520	85720.4	88520	590161	45089	0.00169019	45089	5.57708e-10	64520	231218	47985	1.09522e-06	65900	63546.8	65900	449748	49770	4.35166e-08	49770	1.69644e-07	82530	1.40742e+06	53087	7.07219e-05	63930	157296	51230	1.50808e-09	62676	0.00100276	58843	0.745564	58843	0.237959	98480	7.25823e+06	48594	0.511455	89780
	41891	49298.7	85400	104100	85400	103435	85400	456481	55596	675037	88540	86356.9	88540	593088	45109	0.00173364	45109	5.94225e-10	64540	232593	48005	1.12855e-06	65920	63807.5	65920	452471	49800	4.52479e-08	49800	1.75772e-07	82560	1.41448e+06	53117	7.30858e-05	63960	158495	51250	1.55887e-09	62696	0.00101547	58863	0.751185	58863	0.240011	98500	7.27597e+06	48614	0.5171	89800
	41911	49658.7	85420	104578	85420	103879	85420	458556	55616	681523	88560	86997.7	88560	596029	45129	0.00177813	45129	6.32967e-10	64560	233976	48025	1.16283e-06	65940	64069.1	65940	455208	49830	4.70444e-08	49830	1.82111e-07	82590	1.42156e+06	53147	7.55242e-05	63990	159701	51270	1.6113e-09	62716	0.00102833	58883	0.756844	58883	0.24208	98520	7.29376e+06	48634	0.522803	89820
	41931	50021.1	85440	105058	85440	104323	85440	460639	55636	688067	88580	87643	88580	598983	45149	0.00182368	45149	6.7379e-10	64580	235366	48045	1.19809e-06	65960	64331.5	65960	457961	49860	4.89086e-08	49860	1.88666e-07	82620	1.42868e+06	53177	7.80394e-05	64020	160915	51290	1.66539e-09	62736	0.00104134	58903	0.762543	58903	0.244165	98540	7.31159e+06	48654	0.528564	89840
	41951	50385.8	85460	105540	85460	104770	85460	462730	55656	694668	88600	88292.7	88600	601950	45169	0.00187033	45169	7.17213e-10	64600	236763	48065	1.23437e-06	65980	64595	65980	460729	49890	5.08428e-08	49890	1.95444e-07	82650	1.43582e+06	53207	8.06335e-05	64050	162137	51310	1.72121e-09	62756	0.00105451	58923	0.768281	58923	0.246266	98560	7.32945e+06	48674	0.534383	89860
	41971	50752.7	85480	106024	85480	105218	85480	464830	55676	701327	88620	88946.9	88620	604931	45189	0.00191809	45189	7.63286e-10	64620	238167	48085	1.27168e-06	66000	64859.3	66000	463512	49920	5.28496e-08	49920	2.02453e-07	82680	1.443e+06	53237	8.3309e-05	64080	163368	51330	1.77882e-09	62776	0.00106783	58943	0.774058	58943	0.248385	98580	7.34735e+06	48694	0.540262	89880
	41991	51122.1	85500	106510	85500	105668	85500	466939	55696	708045	88640	89605.6	88640	607925	45209	0.00196698	45209	8.11795e-10	64640	239579	48105	1.31005e-06	66020	65124.6	66020	466309	49950	5.49314e-08	49950	2.097e-07	82710	1.45021e+06	53267	8.60683e-05	64110	164607	51350	1.83825e-09	62796	0.00108132	58963	0.779875	58963	0.25052	98600	7.36528e+06	48714	0.546201	89900
	42011	51493.8	85520	106998	85520	106120	85520	469056	55716	714822	88660	90268.9	88660	610932	45229	0.00201704	45229	8.63327e-10	64660	240999	48125	1.34952e-06	66040	65390.8	66040	469123	49980	5.70909e-08	49980	2.17192e-07	82740	1.45745e+06	53297	8.89137e-05	64140	165854	51370	1.89957e-09	62816	0.00109496	58983	0.785733	58983	0.252672	98620	7.38326e+06	48734	0.5522	89920
	42031	51867.8	85540	107488	85540	106573	85540	471182	55736	721658	88680	90936.7	88680	613953	45249	0.00206828	45249	9.17978e-10	64680	242426	48145	1.39011e-06	66060	65658	66060	471951	50010	5.93309e-08	50010	2.24938e-07	82770	1.46472e+06	53327	9.18479e-05	64170	167110	51390	1.96284e-09	62836	0.00110877	59003	0.79163	59003	0.254841	98640	7.40127e+06	48754	0.55826	89940
	42051	52244.2	85560	107980	85560	107028	85560	473316	55756	728555	88700	91609.1	88700	616988	45269	0.00212074	45269	9.75509e-10	64700	243860	48165	1.43186e-06	66080	65926.1	66080	474795	50040	6.16541e-08	50040	2.32945e-07	82800	1.47203e+06	53357	9.48734e-05	64200	168374	51410	2.02811e-09	62856	0.00112274	59023	0.797568	59023	0.257027	98660	7.41932e+06	48774	0.564382	89960
	42071	52623.1	85580	108474	85580	107485	85580	475459	55776	735512	88720	92286.1	88720	620036	45289	0.00217445	45289	1.03651e-09	64720	245302	48185	1.47478e-06	66100	66195.1	66100	477654	50070	6.40637e-08	50070	2.41222e-07	82830	1.47936e+06	53387	9.79928e-05	64230	169646	51430	2.09544e-09	62876	0.00113688	59043	0.803547	59043	0.259231	98680	7.43741e+06	48794	0.570566	89980
	42091	53004.3	85600	108970	85600	107944	85600	477611	55796	742530	88740	92967.8	88740	623097	45309	0.00222942	45309	1.10117e-09	64740	246752	48205	1.51892e-06	66120	66465.1	66120	480528	50100	6.65624e-08	50100	2.49777e-07	82860	1.48673e+06	53417	0.000101209	64260	170927	51450	2.1649e-09	62896	0.00115118	59063	0.809567	59063	0.261452	98700	7.45553e+06	48814	0.576813	90000
	42111	53387.9	85620	109468	85620	108404	85620	479772	55816	749609	88760	93654.1	88760	626173	45329	0.00228568	45329	1.16924e-09	64760	248209	48225	1.56431e-06	66140	66736.1	66140	483419	50130	6.91536e-08	50130	2.58619e-07	82890	1.49413e+06	53447	0.000104525	64290	172216	51470	2.23654e-09	62916	0.00116565	59083	0.815628	59083	0.263691	98720	7.47369e+06	48834	0.583122	90020
	42131	53774	85640	109968	85640	108866	85640	481941	55836	756750	88780	94345.2	88780	629262	45349	0.00234327	45349	1.2413e-09	64780	249674	48245	1.61098e-06	66160	67008	66160	486325	50160	7.18404e-08	50160	2.67758e-07	82920	1.50157e+06	53477	0.000107943	64320	173514	51490	2.31044e-09	62936	0.0011803	59103	0.821731	59103	0.265947	98740	7.4919e+06	48854	0.589496	90040
	42151	54162.5	85660	110470	85660	109330	85660	484119	55856	763954	88800	95040.9	88800	632365	45369	0.00240222	45369	1.31766e-09	64800	251147	48265	1.65897e-06	66180	67280.8	66180	489246	50190	7.46261e-08	50190	2.77203e-07	82950	1.50903e+06	53507	0.000111467	64350	174821	51510	2.38666e-09	62956	0.00119512	59123	0.827876	59123	0.268221	98760	7.51014e+06	48874	0.595934	90060
	42171	54553.4	85680	110974	85680	109795	85680	486306	55876	771221	88820	95741.5	88820	635482	45389	0.00246254	45389	1.398e-09	64820	252627	48285	1.7083e-06	66200	67554.7	66200	492184	50220	7.75142e-08	50220	2.86963e-07	82980	1.51653e+06	53537	0.000115099	64380	176136	51530	2.46527e-09	62976	0.00121012	59143	0.834062	59143	0.270513	98780	7.52841e+06	48894	0.602437	90080
	42191	54946.8	85700	111481	85700	110263	85700	488501	55896	778551	88840	96446.9	88840	638613	45409	0.00252429	45409	1.48296e-09	64840	254115	48305	1.75902e-06	66220	67829.4	66220	495137	50250	8.05082e-08	50250	2.97048e-07	83010	1.52406e+06	53567	0.000118843	64410	177460	51550	2.54634e-09	62996	0.00122529	59163	0.840291	59163	0.272824	98800	7.54673e+06	48914	0.609006	90100
	42211	55342.7	85720	111989	85720	110732	85720	490706	55916	785945	88860	97157.1	88860	641758	45429	0.00258747	45429	1.57293e-09	64860	255611	48325	1.81116e-06	66240	68105.2	66240	498106	50280	8.36119e-08	50280	3.07469e-07	83040	1.53162e+06	53597	0.000122701	64440	178793	51570	2.62995e-09	63016	0.00124064	59183	0.846563	59183	0.275152	98820	7.56508e+06	48934	0.615641	90120
	42231	55741.1	85740	112499	85740	111202	85740	492919	55936	793404	88880	97872.1	88880	644916	45449	0.00265213	45449	1.66756e-09	64880	257115	48345	1.86476e-06	66260	68381.9	66260	501092	50310	8.68289e-08	50310	3.18235e-07	83070	1.53921e+06	53627	0.000126678	64470	180135	51590	2.71616e-09	63036	0.00125617	59203	0.852877	59203	0.277499	98840	7.58348e+06	48954	0.622343	90140
	42251	56142	85760	113012	85760	111675	85760	495141	55956	800928	88900	98592	88900	648089	45469	0.0027183	45469	1.76753e-09	64900	258626	48365	1.91986e-06	66280	68659.6	66280	504093	50340	9.01633e-08	50340	3.29359e-07	83100	1.54684e+06	53657	0.000130776	64500	181486	51610	2.80507e-09	63056	0.00127189	59223	0.859235	59223	0.279864	98860	7.60191e+06	48974	0.629113	90160
	42271	56545.5	85780	113526	85780	112150	85780	497373	55976	808517	88920	99316.9	88920	651276	45489	0.002786	45489	1.87332e-09	64920	260146	48385	1.97649e-06	66300	68938.2	66300	507111	50370	9.36191e-08	50370	3.40851e-07	83130	1.5545e+06	53687	0.000135	64530	182845	51630	2.89673e-09	63076	0.00128779	59243	0.865636	59243	0.282248	98880	7.62038e+06	48994	0.635951	90180
	42291	56951.4	85800	114043	85800	112626	85800	499613	55996	816172	88940	100047	88940	654478	45509	0.00285528	45509	1.98455e-09	64940	261673	48405	2.0347e-06	66320	69217.9	66320	510145	50400	9.72003e-08	50400	3.52722e-07	83160	1.5622e+06	53717	0.000139352	64560	184214	51650	2.99125e-09	63096	0.00130388	59263	0.87208	59263	0.284651	98900	7.63888e+06	49014	0.642857	90200
	42311	57359.9	85820	114562	85820	113104	85820	501863	56016	823894	88960	100781	88960	657693	45529	0.00292617	45529	2.10194e-09	64960	263209	48425	2.09453e-06	66340	69498.5	66340	513195	50430	1.00911e-07	50430	3.64984e-07	83190	1.56993e+06	53747	0.000143836	64590	185591	51670	3.0887e-09	63116	0.00132016	59283	0.878569	59283	0.287073	98920	7.65743e+06	49034	0.649833	90220
	42331	57771	85840	115082	85840	113584	85840	504121	56036	831682	88980	101521	88980	660923	45549	0.0029987	45549	2.22607e-09	64980	264752	48445	2.15602e-06	66360	69780.1	66360	516262	50460	1.04757e-07	50460	3.7765e-07	83220	1.57769e+06	53777	0.000148457	64620	186978	51690	3.18916e-09	63136	0.00133663	59303	0.885101	59303	0.289513	98940	7.67601e+06	49054	0.656879	90240
	42351	58184.6	85860	115605	85860	114065	85860	506389	56056	839538	89000	102266	89000	664168	45569	0.0030729	45569	2.35655e-09	65000	266304	48465	2.21921e-06	66380	70062.6	66380	519345	50490	1.08741e-07	50490	3.90732e-07	83250	1.58548e+06	53807	0.000153217	64650	188374	51710	3.29274e-09	63156	0.00135329	59323	0.891679	59323	0.291973	98960	7.69464e+06	49074	0.663995	90260
	42371	58600.9	85880	116130	85880	114549	85880	508665	56076	847463	89020	103016	89020	667426	45589	0.00314882	45589	2.49414e-09	65020	267863	48485	2.28416e-06	66400	70346.2	66400	522444	50520	1.12869e-07	50520	4.04243e-07	83280	1.59331e+06	53837	0.000158121	64680	189779	51730	3.39951e-09	63176	0.00137015	59343	0.898301	59343	0.294452	98980	7.7133e+06	49094	0.671183	90280
	42391	59019.7	85900	116658	85900	115034	85900	510951	56096	855456	89040	103771	89040	670700	45609	0.00322649	45609	2.63951e-09	65040	269431	48505	2.35089e-06	66420	70630.8	66420	525561	50550	1.17146e-07	50550	4.18196e-07	83310	1.60117e+06	53867	0.000163174	64710	191193	51750	3.50957e-09	63196	0.00138721	59363	0.904968	59363	0.296951	99000	7.732e+06	49114	0.678443	90300
	42411	59441.2	85920	117187	85920	115521	85920	513246	56116	863518	89060	104531	89060	673987	45629	0.00330594	45629	2.7923e-09	65060	271007	48525	2.41947e-06	66440	70916.3	66440	528694	50580	1.21576e-07	50580	4.32605e-07	83340	1.60907e+06	53897	0.000168378	64740	192617	51770	3.62302e-09	63216	0.00140447	59383	0.91168	59383	0.299469	99020	7.75074e+06	49134	0.685775	90320
	42431	59865.2	85940	117719	85940	116010	85940	515550	56136	871650	89080	105297	89080	677290	45649	0.00338722	45649	2.95327e-09	65080	272591	48545	2.48994e-06	66460	71202.8	66460	531844	50610	1.26165e-07	50610	4.47484e-07	83370	1.617e+06	53927	0.000173739	64770	194050	51790	3.73995e-09	63236	0.00142193	59403	0.918438	59403	0.302006	99040	7.76952e+06	49154	0.693181	90340
	42451	60292	85960	118252	85960	116501	85960	517864	56156	879852	89100	106067	89100	680607	45669	0.00347037	45669	3.1232e-09	65100	274183	48565	2.56234e-06	66480	71490.4	66480	535011	50640	1.30918e-07	50640	4.62847e-07	83400	1.62496e+06	53957	0.000179261	64800	195492	51810	3.86048e-09	63256	0.00143959	59423	0.925241	59423	0.304564	99060	7.78834e+06	49174	0.700661	90360
	42471	60721.3	85980	118788	85980	116993	85980	520187	56176	888125	89120	106843	89120	683939	45689	0.00355541	45689	3.30177e-09	65120	275784	48585	2.63673e-06	66500	71778.9	66500	538195	50670	1.3584e-07	50670	4.78709e-07	83430	1.63296e+06	53987	0.000184949	64830	196944	51830	3.98469e-09	63276	0.00145747	59443	0.932091	59443	0.307142	99080	7.8072e+06	49194	0.708215	90380
	42491	61153.4	86000	119326	86000	117488	86000	522519	56196	896469	89140	107624	89140	687285	45709	0.0036424	45709	3.48974e-09	65140	277393	48605	2.71316e-06	66520	72068.5	66520	541395	50700	1.40938e-07	50700	4.95086e-07	83460	1.64099e+06	54017	0.000190807	64860	198405	51850	4.11271e-09	63296	0.00147555	59463	0.938987	59463	0.30974	99100	7.8261e+06	49214	0.715845	90400
	42511	61588.1	86020	119866	86020	117984	86020	524860	56216	904886	89160	108410	89160	690647	45729	0.00373138	45729	3.68802e-09	65160	279010	48625	2.79169e-06	66540	72359	66540	544613	50730	1.46218e-07	50730	5.11994e-07	83490	1.64906e+06	54047	0.00019684	64890	199876	51870	4.24464e-09	63316	0.00149384	59483	0.94593	59483	0.312358	99120	7.84503e+06	49234	0.723551	90420
	42531	62025.6	86040	120409	86040	118482	86040	527211	56236	913375	89180	109202	89180	694023	45749	0.00382238	45749	3.89634e-09	65180	280635	48645	2.87235e-06	66560	72650.6	66560	547849	50760	1.51685e-07	50760	5.29447e-07	83520	1.65716e+06	54077	0.000203052	64920	201357	51890	4.38059e-09	63336	0.00151235	59503	0.95292	59503	0.314996	99140	7.86401e+06	49254	0.731333	90440
	42551	62465.7	86060	120953	86060	118982	86060	529572	56256	921937	89200	109999	89200	697415	45769	0.00391546	45769	4.11546e-09	65200	282270	48665	2.95522e-06	66580	72943.2	66580	551101	50790	1.57345e-07	50790	5.47464e-07	83550	1.6653e+06	54107	0.00020945	64950	202847	51910	4.52067e-09	63356	0.00153107	59523	0.959958	59523	0.317655	99160	7.88302e+06	49274	0.739193	90460
	42571	62908.6	86080	121500	86080	119484	86080	531941	56276	930572	89220	110802	89220	700821	45789	0.00401064	45789	4.3464e-09	65220	283912	48685	3.04035e-06	66600	73236.8	66600	554371	50820	1.63206e-07	50820	5.66061e-07	83580	1.67347e+06	54137	0.000216037	64980	204347	51930	4.66502e-09	63376	0.00155001	59543	0.967042	59543	0.320335	99180	7.90208e+06	49294	0.747131	90480
	42591	63354.3	86100	122049	86100	119988	86100	534321	56296	939282	89240	111610	89240	704242	45809	0.00410799	45809	4.58899e-09	65240	285563	48705	3.12779e-06	66620	73531.4	66620	557658	50850	1.69274e-07	50850	5.85256e-07	83610	1.68168e+06	54167	0.00022282	65010	205857	51950	4.81375e-09	63396	0.00156917	59563	0.974175	59563	0.323036	99200	7.92117e+06	49314	0.755148	90500
	42611	63802.6	86120	122600	86120	120494	86120	536709	56316	948066	89260	112423	89260	707679	45829	0.00420754	45829	4.84399e-09	65260	287223	48725	3.21761e-06	66640	73827.1	66640	560963	50880	1.75556e-07	50880	6.05067e-07	83640	1.68992e+06	54197	0.000229804	65040	207376	51970	4.96699e-09	63416	0.00158855	59583	0.981356	59583	0.325758	99220	7.94031e+06	49334	0.763245	90520
	42631	64253.8	86140	123154	86140	121001	86140	539108	56336	956926	89280	113242	89280	711131	45849	0.00430934	45849	5.11255e-09	65280	288891	48745	3.30986e-06	66660	74123.7	66660	564286	50910	1.82058e-07	50910	6.25512e-07	83670	1.6982e+06	54227	0.000236994	65070	208906	51990	5.12487e-09	63436	0.00160816	59603	0.988585	59603	0.328501	99240	7.95948e+06	49354	0.771421	90540
	42651	64707.7	86160	123710	86160	121511	86160	541516	56356	965862	89300	114066	89300	714598	45869	0.00441344	45869	5.39459e-09	65300	290568	48765	3.4046e-06	66680	74421.4	66680	567626	50940	1.88789e-07	50940	6.46612e-07	83700	1.70651e+06	54257	0.000244396	65100	210445	52010	5.28751e-09	63456	0.001628	59623	0.995863	59623	0.331265	99260	7.97869e+06	49374	0.779679	90560
	42671	65164.5	86180	124267	86180	122022	86180	543933	56376	974875	89320	114896	89320	718080	45889	0.00451988	45889	5.69081e-09	65320	292253	48785	3.50191e-06	66700	74720.1	66700	570984	50970	1.95755e-07	50970	6.68385e-07	83730	1.71486e+06	54287	0.000252017	65130	211995	52030	5.45507e-09	63476	0.00164807	59643	1.00319	59643	0.334051	99280	7.99794e+06	49394	0.788019	90580
	42691	65624.1	86200	124828	86200	122536	86200	546361	56396	983964	89340	115732	89340	721578	45909	0.00462872	45909	6.00256e-09	65340	293947	48805	3.60184e-06	66720	75019.9	66720	574360	51000	2.02966e-07	51000	6.90852e-07	83760	1.72324e+06	54317	0.000259861	65160	213554	52050	5.62767e-09	63496	0.00166838	59663	1.01057	59663	0.336858	99300	8.01724e+06	49414	0.796441	90600
	42711	66086.4	86220	125390	86220	123051	86220	548797	56416	993132	89360	116573	89360	725091	45929	0.00474	45929	6.3299e-09	65360	295650	48825	3.70447e-06	66740	75320.7	66740	577754	51030	2.10427e-07	51030	7.14033e-07	83790	1.73166e+06	54347	0.000267935	65190	215124	52070	5.80546e-09	63516	0.00168891	59683	1.01799	59683	0.339687	99320	8.03657e+06	49434	0.804946	90620
	42731	66551.7	86240	125955	86240	123568	86240	551244	56436	1.00238e+06	89380	117420	89380	728620	45949	0.00485377	45949	6.67348e-09	65380	297361	48845	3.80986e-06	66760	75622.5	66760	581166	51060	2.18149e-07	51060	7.37951e-07	83820	1.74012e+06	54377	0.000276247	65220	216704	52090	5.9886e-09	63536	0.00170969	59703	1.02547	59703	0.342538	99340	8.05594e+06	49454	0.813535	90640
	42751	67019.8	86260	126522	86260	124087	86260	553701	56456	1.0117e+06	89400	118273	89400	732164	45969	0.0049701	45969	7.0348e-09	65400	299082	48865	3.91807e-06	66780	75925.4	66780	584596	51090	2.2614e-07	51090	7.62627e-07	83850	1.74861e+06	54407	0.000284801	65250	218294	52110	6.17723e-09	63556	0.00173071	59723	1.03299	59723	0.345411	99360	8.07536e+06	49474	0.822209	90660
	42771	67490.8	86280	127091	86280	124608	86280	556167	56476	1.02111e+06	89420	119131	89420	735724	45989	0.00508902	45989	7.41408e-09	65420	300811	48885	4.02919e-06	66800	76229.3	66800	588044	51120	2.34408e-07	51120	7.88083e-07	83880	1.75714e+06	54437	0.000293605	65280	219894	52130	6.3715e-09	63576	0.00175197	59743	1.04057	59743	0.348307	99380	8.09481e+06	49494	0.830969	90680
	42791	67964.6	86300	127663	86300	125131	86300	558643	56496	1.03059e+06	89440	119995	89440	739300	46009	0.0052106	46009	7.81194e-09	65440	302549	48905	4.14329e-06	66820	76534.3	66820	591511	51150	2.42962e-07	51150	8.14344e-07	83910	1.7657e+06	54467	0.000302665	65310	221505	52150	6.57159e-09	63596	0.00177348	59763	1.0482	59763	0.351225	99400	8.1143e+06	49514	0.839815	90700
	42811	68441.4	86320	128237	86320	125656	86320	561129	56516	1.04016e+06	89460	120866	89460	742891	46029	0.00533488	46029	8.23005e-09	65460	304296	48925	4.26043e-06	66840	76840.4	66840	594996	51180	2.51812e-07	51180	8.41433e-07	83940	1.7743e+06	54497	0.000311989	65340	223126	52170	6.77765e-09	63616	0.00179523	59783	1.05588	59783	0.354165	99420	8.13384e+06	49534	0.848748	90720
	42831	68921.1	86340	128813	86340	126183	86340	563624	56536	1.0498e+06	89480	121741	89480	746498	46049	0.00546193	46049	8.66884e-09	65480	306052	48945	4.38071e-06	66860	77147.4	66860	598500	51210	2.60968e-07	51210	8.69375e-07	83970	1.78294e+06	54527	0.000321584	65370	224758	52190	6.98985e-09	63636	0.00181724	59803	1.06361	59803	0.357128	99440	8.15341e+06	49554	0.857768	90740
	42851	69403.7	86360	129391	86360	126712	86360	566130	56556	1.05953e+06	89500	122623	89500	750122	46069	0.00559181	46069	9.12886e-09	65500	307818	48965	4.50418e-06	66880	77455.6	66880	602022	51240	2.70439e-07	51240	8.98194e-07	84000	1.79161e+06	54557	0.000331457	65400	226400	52210	7.20837e-09	63656	0.0018395	59823	1.07139	59823	0.360114	99460	8.17302e+06	49574	0.866878	90760
	42871	69889.3	86380	129972	86380	127243	86380	568646	56576	1.06934e+06	89520	123511	89520	753761	46089	0.00572456	46089	9.612e-09	65520	309592	48985	4.63095e-06	66900	77764.8	66900	605562	51270	2.80236e-07	51270	9.27918e-07	84030	1.80032e+06	54587	0.000341616	65430	228053	52230	7.43339e-09	63676	0.00186202	59843	1.07922	59843	0.363123	99480	8.19268e+06	49594	0.876077	90780
	42891	70377.9	86400	130555	86400	127776	86400	571172	56596	1.07924e+06	89540	124405	89540	757416	46109	0.00586025	46109	1.01188e-08	65540	311375	49005	4.76108e-06	66920	78075	66920	609122	51300	2.90369e-07	51300	9.58573e-07	84060	1.80907e+06	54617	0.000352069	65460	229716	52250	7.66508e-09	63696	0.0018848	59863	1.08711	59863	0.366155	99500	8.21238e+06	49614	0.885366	90800
	42911	70869.4	86420	131141	86420	128310	86420	573707	56616	1.08922e+06	89560	125304	89560	761087	46129	0.00599895	46129	1.06499e-08	65560	313167	49025	4.89466e-06	66940	78386.4	66940	612700	51330	3.0085e-07	51330	9.90186e-07	84090	1.81786e+06	54647	0.000362823	65490	231390	52270	7.90364e-09	63716	0.00190784	59883	1.09505	59883	0.369211	99520	8.23211e+06	49634	0.894746	90820
	42931	71363.9	86440	131728	86440	128847	86440	576253	56636	1.09928e+06	89580	126210	89580	764774	46149	0.0061407	46149	1.12073e-08	65580	314969	49045	5.03179e-06	66960	78698.8	66960	616297	51360	3.11689e-07	51360	1.02279e-06	84120	1.82668e+06	54677	0.000373886	65520	233075	52290	8.14926e-09	63736	0.00193114	59903	1.10304	59903	0.37229	99540	8.25189e+06	49654	0.904218	90840
	42951	71861.4	86460	132319	86460	129386	86460	578809	56656	1.10943e+06	89600	127122	89600	768477	46169	0.00628558	46169	1.17918e-08	65600	316779	49065	5.17254e-06	66980	79012.3	66980	619913	51390	3.22898e-07	51390	1.0564e-06	84150	1.83554e+06	54707	0.000385268	65550	234770	52310	8.40213e-09	63756	0.00195472	59923	1.11109	59923	0.375393	99560	8.27171e+06	49674	0.913783	90860
	42971	72362	86480	132911	86480	129927	86480	581375	56676	1.11966e+06	89620	128040	89620	772197	46189	0.00643365	46189	1.2404e-08	65620	318599	49085	5.31701e-06	67000	79326.8	67000	623549	51420	3.34489e-07	51420	1.09106e-06	84180	1.84444e+06	54737	0.000396976	65580	236477	52330	8.66247e-09	63776	0.00197857	59943	1.11919	59943	0.37852	99580	8.29156e+06	49694	0.923441	90880
	42991	72865.6	86500	133506	86500	130469	86500	583951	56696	1.12998e+06	89640	128964	89640	775933	46209	0.00658496	46209	1.30462e-08	65640	320429	49105	5.46528e-06	67020	79642.5	67020	627203	51450	3.46474e-07	51450	1.1268e-06	84210	1.85337e+06	54767	0.00040902	65610	238194	52350	8.93048e-09	63796	0.00200269	59963	1.12734	59963	0.381671	99600	8.31146e+06	49714	0.933194	90900
	43011	73372.3	86520	134103	86520	131014	86520	586538	56716	1.14039e+06	89660	129894	89660	779685	46229	0.0067396	46229	1.37194e-08	65660	322267	49125	5.61746e-06	67040	79959.2	67040	630877	51480	3.58866e-07	51480	1.16364e-06	84240	1.86234e+06	54797	0.000421408	65640	239923	52370	9.20637e-09	63816	0.00202708	59983	1.13555	59983	0.384846	99620	8.3314e+06	49734	0.943042	90920
	43031	73882	86540	134703	86540	131561	86540	589135	56736	1.15089e+06	89680	130831	89680	783454	46249	0.00689763	46249	1.44241e-08	65680	324115	49145	5.77364e-06	67060	80277	67060	634570	51510	3.71679e-07	51510	1.20163e-06	84270	1.87135e+06	54827	0.00043415	65670	241662	52390	9.49036e-09	63836	0.00205176	60003	1.14381	60003	0.388045	99640	8.35139e+06	49754	0.952986	90940
	43051	74394.9	86560	135305	86560	132110	86560	591742	56756	1.16147e+06	89700	131773	89700	787239	46269	0.00705911	46269	1.51629e-08	65700	325973	49165	5.93393e-06	67080	80595.9	67080	638282	51540	3.84925e-07	51540	1.24078e-06	84300	1.8804e+06	54857	0.000447255	65700	243413	52410	9.78269e-09	63856	0.00207672	60023	1.15213	60023	0.391269	99660	8.37141e+06	49774	0.963027	90960
	43071	74910.8	86580	135910	86580	132661	86580	594359	56776	1.17215e+06	89720	132722	89720	791041	46289	0.00722411	46289	1.59371e-08	65720	327840	49185	6.09841e-06	67100	80915.9	67100	642014	51570	3.98618e-07	51570	1.28115e-06	84330	1.88949e+06	54887	0.000460734	65730	245175	52430	1.00836e-08	63876	0.00210197	60043	1.1605	60043	0.394517	99680	8.39147e+06	49794	0.973166	90980
	43091	75429.9	86600	136517	86600	133214	86600	596987	56796	1.18291e+06	89740	133678	89740	794860	46309	0.00739272	46309	1.67472e-08	65740	329716	49205	6.26719e-06	67120	81236.9	67120	645766	51600	4.12772e-07	51600	1.32276e-06	84360	1.89862e+06	54917	0.000474595	65760	246948	52450	1.03933e-08	63896	0.0021275	60063	1.16893	60063	0.397791	99700	8.41158e+06	49814	0.983404	91000
	43111	75952.1	86620	137126	86620	133769	86620	599625	56816	1.19377e+06	89760	134640	89760	798695	46329	0.00756499	46329	1.7596e-08	65760	331602	49225	6.44039e-06	67140	81559.1	67140	649537	51630	4.27404e-07	51630	1.36564e-06	84390	1.90778e+06	54947	0.000488849	65790	248732	52470	1.0712e-08	63916	0.00215333	60083	1.17742	60083	0.40109	99720	8.43172e+06	49834	0.993741	91020
	43131	76477.4	86640	137738	86640	134326	86640	602273	56836	1.20471e+06	89780	135608	89780	802547	46349	0.007741	46349	1.8485e-08	65780	333497	49245	6.61811e-06	67160	81882.4	67160	653329	51660	4.42526e-07	51660	1.40984e-06	84420	1.91698e+06	54977	0.000503506	65820	250528	52490	1.104e-08	63936	0.00217945	60103	1.18596	60103	0.404413	99740	8.45191e+06	49854	1.00418	91040
	43151	77006	86660	138352	86660	134885	86660	604932	56856	1.21575e+06	89800	136583	89800	806416	46369	0.00792084	46369	1.9415e-08	65800	335402	49265	6.80046e-06	67180	82206.8	67180	657140	51690	4.58156e-07	51690	1.4554e-06	84450	1.92622e+06	55007	0.000518578	65850	252335	52510	1.13776e-08	63956	0.00220588	60123	1.19455	60123	0.407763	99760	8.47214e+06	49874	1.01472	91060
	43171	77537.7	86680	138969	86680	135446	86680	607602	56876	1.22688e+06	89820	137564	89820	810301	46389	0.00810457	46389	2.03888e-08	65820	337317	49285	6.98754e-06	67200	82532.3	67200	660971	51720	4.74308e-07	51720	1.50235e-06	84480	1.9355e+06	55037	0.000534075	65880	254153	52530	1.1725e-08	63976	0.0022326	60143	1.20321	60143	0.411138	99780	8.49241e+06	49894	1.02536	91080
	43191	78072.6	86700	139588	86700	136009	86700	610282	56896	1.23811e+06	89840	138552	89840	814204	46409	0.00829228	46409	2.14083e-08	65840	339242	49305	7.17949e-06	67220	82858.9	67220	664822	51750	4.91001e-07	51750	1.55073e-06	84510	1.94482e+06	55067	0.000550009	65910	255984	52550	1.20824e-08	63996	0.00225963	60163	1.21192	60163	0.414538	99800	8.51272e+06	49914	1.0361	91100
	43211	78610.7	86720	140210	86720	136574	86720	612972	56916	1.24943e+06	89860	139546	89860	818124	46429	0.00848404	46429	2.24744e-08	65860	341176	49325	7.37642e-06	67240	83186.6	67240	668694	51780	5.0825e-07	51780	1.60058e-06	84540	1.95418e+06	55097	0.000566391	65940	257825	52570	1.24503e-08	64016	0.00228697	60183	1.22069	60183	0.417965	99820	8.53308e+06	49934	1.04695	91120
	43231	79152.1	86740	140834	86740	137142	86740	615673	56936	1.26084e+06	89880	140547	89880	822060	46449	0.00867994	46449	2.35903e-08	65880	343120	49345	7.57845e-06	67260	83515.4	67260	672585	51810	5.26073e-07	51810	1.65195e-06	84570	1.96358e+06	55127	0.000583233	65970	259679	52590	1.28288e-08	64036	0.00231461	60203	1.22952	60203	0.421417	99840	8.55347e+06	49954	1.0579	91140
	43251	79696.8	86760	141460	86760	137711	86760	618385	56956	1.27235e+06	89900	141555	89900	826014	46469	0.00888005	46469	2.47579e-08	65900	345074	49365	7.7857e-06	67280	83845.4	67280	676497	51840	5.44488e-07	51840	1.70489e-06	84600	1.97301e+06	55157	0.000600547	66000	261544	52610	1.32182e-08	64056	0.00234258	60223	1.2384	60223	0.424896	99860	8.57391e+06	49974	1.06896	91160
	43271	80244.7	86780	142089	86780	138283	86780	621108	56976	1.28396e+06	89920	142569	89920	829986	46489	0.00908447	46489	2.59785e-08	65920	347038	49385	7.9983e-06	67300	84176.4	67300	680430	51870	5.63515e-07	51870	1.75942e-06	84630	1.98249e+06	55187	0.000618345	66030	263421	52630	1.36189e-08	64076	0.00237086	60243	1.24735	60243	0.428402	99880	8.59439e+06	49994	1.08013	91180
	43291	80795.8	86800	142721	86800	138857	86800	623841	56996	1.29566e+06	89940	143590	89940	833974	46509	0.00929327	46509	2.72554e-08	65940	349012	49405	8.21639e-06	67320	84508.6	67320	684383	51900	5.83171e-07	51900	1.81561e-06	84660	1.99201e+06	55217	0.00063664	66060	265310	52650	1.40311e-08	64096	0.00239946	60263	1.25635	60263	0.431934	99900	8.61491e+06	50014	1.0914	91200
	43311	81350.3	86820	143355	86820	139432	86820	626585	57016	1.30746e+06	89960	144618	89960	837980	46529	0.00950655	46529	2.8591e-08	65960	350995	49425	8.44009e-06	67340	84842	67340	688357	51930	6.03477e-07	51930	1.87349e-06	84690	2.00156e+06	55247	0.000655446	66090	267211	52670	1.44551e-08	64116	0.00242839	60283	1.26542	60283	0.435493	99920	8.63548e+06	50034	1.10279	91220
	43331	81908.1	86840	143991	86840	140010	86840	629340	57036	1.31936e+06	89980	145653	89980	842003	46549	0.0097244	46549	2.99867e-08	65980	352989	49445	8.66954e-06	67360	85176.4	67360	692351	51960	6.24453e-07	51960	1.93312e-06	84720	2.01116e+06	55277	0.000674775	66120	269124	52690	1.48914e-08	64136	0.00245765	60303	1.27454	60303	0.43908	99940	8.65608e+06	50054	1.11428	91240
	43351	82469.3	86860	144631	86860	140590	86860	632105	57056	1.33135e+06	90000	146694	90000	846044	46569	0.0099469	46569	3.1446e-08	66000	354993	49465	8.90487e-06	67380	85512	67380	696366	51990	6.46119e-07	51990	1.99455e-06	84750	2.02079e+06	55307	0.000694642	66150	271048	52710	1.53402e-08	64156	0.00248724	60323	1.28372	60323	0.442693	99960	8.67673e+06	50074	1.12588	91260
	43371	83033.8	86880	145272	86880	141173	86880	634882	57076	1.34345e+06	90020	147743	90020	850103	46589	0.0101741	46589	3.29718e-08	66020	357007	49485	9.14624e-06	67400	85848.8	67400	700403	52020	6.68498e-07	52020	2.05782e-06	84780	2.03047e+06	55337	0.00071506	66180	272985	52730	1.58018e-08	64176	0.00251716	60343	1.29297	60343	0.446334	99980	8.69742e+06	50094	1.1376	91280
	43391	83601.7	86900	145916	86900	141757	86900	637669	57096	1.35565e+06	90040	148798	90040	854179	46609	0.0104062	46609	3.45657e-08	66040	359031	49505	9.39379e-06	67420	86186.7	67420	704460	52050	6.91612e-07	52050	2.12299e-06	84810	2.04019e+06	55367	0.000736043	66210	274935	52750	1.62767e-08	64196	0.00254743	60363	1.30227	60363	0.450002	100000	8.71815e+06	50114	1.14942	91300
	43411	84172.9	86920	146563	86920	142344	86920	640468	57116	1.36795e+06	90060	149861	90060	858272	46629	0.0106433	46629	3.62313e-08	66060	361065	49525	9.64766e-06	67440	86525.7	67440	708538	52080	7.15483e-07	52080	2.19012e-06	84840	2.04994e+06	55397	0.000757607	66240	276896	52770	1.67651e-08	64216	0.00257804	60383	1.31164	60383	0.453699	100020	8.73893e+06	50134	1.16137	91320
	43431	84747.6	86940	147212	86940	142932	86940	643277	57136	1.38036e+06	90080	150930	90080	862384	46649	0.0108853	46649	3.79722e-08	66080	363109	49545	9.90801e-06	67460	86865.9	67460	712638	52110	7.40134e-07	52110	2.25925e-06	84870	2.05974e+06	55427	0.000779767	66270	278870	52790	1.72675e-08	64236	0.00260899	60403	1.32107	60403	0.457423	100040	8.75975e+06	50154	1.17342	91340
	43451	85325.7	86960	147864	86960	143523	86960	646097	57156	1.39286e+06	90100	152007	90100	866513	46669	0.0111325	46669	3.97902e-08	66100	365164	49565	1.0175e-05	67480	87207.2	67480	716759	52140	7.6559e-07	52140	2.33045e-06	84900	2.06958e+06	55457	0.000802537	66300	280856	52810	1.77842e-08	64256	0.00264029	60423	1.33056	60423	0.461176	100060	8.78061e+06	50174	1.18559	91360
	43471	85907.2	86980	148519	86980	144116	86980	648929	57176	1.40547e+06	90120	153091	90120	870660	46689	0.0113849	46689	4.16892e-08	66120	367229	49585	1.04488e-05	67500	87549.7	67500	720902	52170	7.91876e-07	52170	2.40377e-06	84930	2.07946e+06	55487	0.000825934	66330	282855	52830	1.83155e-08	64276	0.00267195	60443	1.34011	60443	0.464956	100080	8.80151e+06	50194	1.19788	91380
	43491	86492.2	87000	149176	87000	144711	87000	651771	57196	1.41819e+06	90140	154182	90140	874826	46709	0.0116427	46709	4.36732e-08	66140	369305	49605	1.07295e-05	67520	87893.3	67520	725066	52200	8.19017e-07	52200	2.47927e-06	84960	2.08938e+06	55517	0.000849973	66360	284866	52850	1.8862e-08	64296	0.00270397	60463	1.34972	60463	0.468766	100100	8.82245e+06	50214	1.21029	91400
	43511	87080.6	87020	149836	87020	145308	87020	654625	57216	1.43101e+06	90160	155280	90160	879009	46729	0.0119059	46729	4.57443e-08	66160	371391	49625	1.10174e-05	67540	88238.1	67540	729251	52230	8.47039e-07	52230	2.55701e-06	84990	2.09935e+06	55547	0.000874672	66390	286890	52870	1.9424e-08	64316	0.00273634	60483	1.3594	60483	0.472604	100120	8.84344e+06	50234	1.22281	91420
	43531	87672.6	87040	150498	87040	145908	87040	657490	57236	1.44393e+06	90180	156385	90180	883210	46749	0.0121747	46749	4.79068e-08	66180	373487	49645	1.13125e-05	67560	88584.1	67560	733458	52260	8.7597e-07	52260	2.63706e-06	85020	2.10935e+06	55577	0.000900048	66420	288926	52890	2.00019e-08	64336	0.00276908	60503	1.36914	60503	0.476472	100140	8.86447e+06	50254	1.23546	91440
	43551	88268	87060	151163	87060	146510	87060	660366	57256	1.45696e+06	90200	157498	90200	887430	46769	0.0124491	46769	5.0165e-08	66200	375594	49665	1.16151e-05	67580	88931.2	67580	737688	52290	9.05837e-07	52290	2.71949e-06	85050	2.1194e+06	55607	0.000926117	66450	290975	52910	2.05961e-08	64356	0.0028022	60523	1.37895	60523	0.480368	100160	8.88555e+06	50274	1.24822	91460
	43571	88867	87080	151830	87080	147114	87080	663253	57276	1.47011e+06	90220	158618	90220	891668	46789	0.0127293	46789	5.25217e-08	66220	377711	49685	1.19253e-05	67600	89279.6	67600	741939	52320	9.36669e-07	52320	2.80434e-06	85080	2.12948e+06	55637	0.000952898	66480	293037	52930	2.12071e-08	64376	0.00283568	60543	1.38882	60543	0.484294	100180	8.90666e+06	50294	1.26111	91480
	43591	89469.5	87100	152500	87100	147720	87100	666151	57296	1.48336e+06	90240	159745	90240	895924	46809	0.0130153	46809	5.49813e-08	66240	379839	49705	1.22434e-05	67620	89629	67620	746212	52350	9.68495e-07	52350	2.89171e-06	85110	2.13961e+06	55667	0.000980409	66510	295112	52950	2.18354e-08	64396	0.00286954	60563	1.39875	60563	0.48825	100200	8.92782e+06	50314	1.27412	91500
	43611	90075.6	87120	153173	87120	148328	87120	669061	57316	1.49671e+06	90260	160880	90260	900199	46829	0.0133074	46829	5.75488e-08	66260	381978	49725	1.25695e-05	67640	89979.7	67640	750507	52380	1.00135e-06	52380	2.98165e-06	85140	2.14978e+06	55697	0.00100867	66540	297200	52970	2.24814e-08	64416	0.00290378	60583	1.40875	60583	0.492235	100220	8.94903e+06	50334	1.28725	91520
	43631	90685.3	87140	153849	87140	148939	87140	671982	57336	1.51018e+06	90280	162022	90280	904492	46849	0.0136055	46849	6.02274e-08	66280	384127	49745	1.29038e-05	67660	90331.5	67660	754824	52410	1.03525e-06	52410	3.07423e-06	85170	2.16e+06	55727	0.0010377	66570	299301	52990	2.31455e-08	64436	0.00293841	60603	1.41881	60603	0.49625	100240	8.97027e+06	50354	1.30051	91540
	43651	91298.5	87160	154527	87160	149552	87160	674915	57356	1.52376e+06	90300	163172	90300	908803	46869	0.0139099	46869	6.30217e-08	66300	386287	49765	1.32465e-05	67680	90684.6	67680	759164	52440	1.07025e-06	52440	3.16954e-06	85200	2.17025e+06	55757	0.00106751	66600	301415	53010	2.38283e-08	64456	0.00297342	60623	1.42894	60623	0.500296	100260	8.99156e+06	50374	1.3139	91560
	43671	91915.4	87180	155207	87180	150167	87180	677859	57376	1.53746e+06	90320	164330	90320	913134	46889	0.0142207	46889	6.59376e-08	66320	388458	49785	1.35977e-05	67700	91038.8	67700	763526	52470	1.10636e-06	52470	3.26763e-06	85230	2.18055e+06	55787	0.00109813	66630	303542	53030	2.45303e-08	64476	0.00300883	60643	1.43914	60643	0.504372	100280	9.0129e+06	50394	1.32741	91580
	43691	92535.9	87200	155891	87200	150784	87200	680815	57396	1.55126e+06	90340	165495	90340	917483	46909	0.0145379	46909	6.89785e-08	66340	390640	49805	1.39578e-05	67720	91394.2	67720	767911	52500	1.14363e-06	52500	3.3686e-06	85260	2.19089e+06	55817	0.00112958	66660	305682	53050	2.52519e-08	64496	0.00304464	60663	1.4494	60663	0.508478	100300	9.03427e+06	50414	1.34105	91600
	43711	93160.1	87220	156577	87220	151403	87220	683782	57416	1.56518e+06	90360	166668	90360	921850	46929	0.0148617	46929	7.21497e-08	66360	392833	49825	1.43269e-05	67740	91750.8	67740	772318	52530	1.18209e-06	52530	3.47253e-06	85290	2.20127e+06	55847	0.00116188	66690	307835	53070	2.59937e-08	64516	0.00308084	60683	1.45973	60683	0.512616	100320	9.05569e+06	50434	1.35482	91620
	43731	93787.9	87240	157266	87240	152025	87240	686760	57436	1.57921e+06	90380	167848	90380	926237	46949	0.0151923	46949	7.54574e-08	66380	395036	49845	1.47051e-05	67760	92108.6	67760	776749	52560	1.22177e-06	52560	3.57948e-06	85320	2.2117e+06	55877	0.00119504	66720	310002	53090	2.67562e-08	64536	0.00311746	60703	1.47013	60703	0.516784	100340	9.07715e+06	50454	1.36872	91640
	43751	94419.4	87260	157957	87260	152649	87260	689751	57456	1.59336e+06	90400	169036	90400	930642	46969	0.0155296	46969	7.8906e-08	66400	397251	49865	1.50928e-05	67780	92467.6	67780	781202	52590	1.26272e-06	52590	3.68955e-06	85350	2.22217e+06	55907	0.0012291	66750	312183	53110	2.754e-08	64556	0.00315448	60723	1.48059	60723	0.520984	100360	9.09866e+06	50474	1.38276	91660
	43771	95054.6	87280	158652	87280	153276	87280	692753	57476	1.60763e+06	90420	170232	90420	935067	46989	0.015874	46989	8.25008e-08	66420	399476	49885	1.54902e-05	67800	92827.8	67800	785677	52620	1.30497e-06	52620	3.80282e-06	85380	2.23268e+06	55937	0.00126408	66780	314376	53130	2.83456e-08	64576	0.00319192	60743	1.49113	60743	0.525215	100380	9.12021e+06	50494	1.39692	91680
	43791	95693.6	87300	159349	87300	153904	87300	695766	57496	1.62201e+06	90440	171436	90440	939510	47009	0.0162255	47009	8.62491e-08	66440	401713	49905	1.58974e-05	67820	93189.2	67820	790176	52650	1.34855e-06	52650	3.91939e-06	85410	2.24324e+06	55967	0.00129999	66810	316584	53150	2.91737e-08	64596	0.00322977	60763	1.50173	60763	0.529478	100400	9.14181e+06	50514	1.41122	91700
	43811	96336.3	87320	160049	87320	154535	87320	698791	57516	1.63651e+06	90460	172648	90460	943973	47029	0.0165843	47029	9.01556e-08	66460	403960	49925	1.63148e-05	67840	93551.9	67840	794699	52680	1.39352e-06	52680	4.03933e-06	85440	2.25384e+06	55997	0.00133687	66840	318805	53170	3.00247e-08	64616	0.00326805	60783	1.5124	60783	0.533773	100420	9.16344e+06	50534	1.42566	91720
	43831	96982.7	87340	160751	87340	155169	87340	701828	57536	1.65113e+06	90480	173868	90480	948454	47049	0.0169504	47049	9.42263e-08	66480	406219	49945	1.67425e-05	67860	93915.7	67860	799244	52710	1.4399e-06	52710	4.16274e-06	85470	2.26448e+06	56027	0.00137473	66870	321040	53190	3.08994e-08	64636	0.00330675	60803	1.52314	60803	0.5381	100440	9.18513e+06	50554	1.44023	91740
	43851	97633	87360	161456	87360	155804	87360	704877	57556	1.66586e+06	90500	175095	90500	952955	47069	0.0173241	47069	9.84692e-08	66500	408489	49965	1.71807e-05	67880	94280.8	67880	803813	52740	1.48775e-06	52740	4.28972e-06	85500	2.27517e+06	56057	0.0014136	66900	323288	53210	3.17982e-08	64656	0.00334589	60823	1.53395	60823	0.54246	100460	9.20685e+06	50574	1.45494	91760
	43871	98287	87380	162164	87380	156442	87380	707938	57576	1.68072e+06	90520	176331	90520	957476	47089	0.0177055	47089	1.0289e-07	66520	410771	49985	1.76298e-05	67900	94647	67900	808405	52770	1.5371e-06	52770	4.42036e-06	85530	2.2859e+06	56087	0.0014535	66930	325550	53230	3.2722e-08	64676	0.00338546	60843	1.54483	60843	0.546852	100480	9.22862e+06	50594	1.46979	91780
	43891	98944.9	87400	162875	87400	157082	87400	711010	57596	1.6957e+06	90540	177575	90540	962016	47109	0.0180947	47109	1.07495e-07	66540	413063	50005	1.809e-05	67920	95014.6	67920	813021	52800	1.58801e-06	52800	4.55477e-06	85560	2.29668e+06	56117	0.00149447	66960	327827	53250	3.36712e-08	64696	0.00342548	60863	1.55577	60863	0.551276	100500	9.25044e+06	50614	1.48478	91800
	43911	99606.5	87420	163589	87420	157725	87420	714095	57616	1.71081e+06	90560	178827	90560	966575	47129	0.0184919	47129	1.12293e-07	66560	415367	50025	1.85615e-05	67940	95383.3	67940	817660	52830	1.64051e-06	52830	4.69304e-06	85590	2.3075e+06	56147	0.00153652	66990	330117	53270	3.46467e-08	64716	0.00346594	60883	1.5668	60883	0.555734	100520	9.2723e+06	50634	1.4999	91820
	43931	100272	87440	164305	87440	158369	87440	717191	57636	1.72603e+06	90580	180087	90580	971154	47149	0.0188972	47149	1.1729e-07	66580	417683	50045	1.90447e-05	67960	95753.3	67960	822323	52860	1.69466e-06	52860	4.83528e-06	85620	2.31836e+06	56177	0.00157969	67020	332421	53290	3.5649e-08	64736	0.00350685	60903	1.57789	60903	0.560225	100540	9.2942e+06	50654	1.51518	91840
	43951	100941	87460	165024	87460	159017	87460	720300	57656	1.74138e+06	90600	181356	90600	975752	47169	0.0193108	47169	1.22493e-07	66600	420010	50065	1.95397e-05	67980	96124.5	67980	827011	52890	1.75049e-06	52890	4.9816e-06	85650	2.32927e+06	56207	0.001624	67050	334740	53310	3.66789e-08	64756	0.00354821	60923	1.58905	60923	0.56475	100560	9.31615e+06	50674	1.53059	91860
	43971	101615	87480	165746	87480	159666	87480	723420	57676	1.75686e+06	90620	182633	90620	980371	47189	0.0197328	47189	1.27913e-07	66620	422348	50085	2.00468e-05	68000	96496.9	68000	831722	52920	1.80808e-06	52920	5.1321e-06	85680	2.34022e+06	56237	0.00166949	67080	337073	53330	3.7737e-08	64776	0.00359004	60943	1.60029	60943	0.569308	100580	9.33814e+06	50694	1.54615	91880
	43991	102292	87500	166471	87500	160318	87500	726553	57696	1.77246e+06	90640	183918	90640	985009	47209	0.0201634	47209	1.33556e-07	66640	424698	50105	2.05664e-05	68020	96870.6	68020	836457	52950	1.86745e-06	52950	5.28691e-06	85710	2.35122e+06	56267	0.00171617	67110	339420	53350	3.88243e-08	64796	0.00363232	60963	1.6116	60963	0.5739	100600	9.36017e+06	50714	1.56186	91900
	44011	102973	87520	167199	87520	160972	87520	729698	57716	1.78818e+06	90660	185211	90660	989667	47229	0.0206028	47229	1.39431e-07	66660	427059	50125	2.10987e-05	68040	97245.5	68040	841217	52980	1.92868e-06	52980	5.44613e-06	85740	2.36226e+06	56297	0.00176408	67140	341781	53370	3.99413e-08	64816	0.00367508	60983	1.62298	60983	0.578526	100620	9.38225e+06	50734	1.57771	91920
	44031	103658	87540	167929	87540	161629	87540	732854	57736	1.80404e+06	90680	186513	90680	994344	47249	0.0210511	47249	1.45547e-07	66680	429433	50145	2.1644e-05	68060	97621.7	68060	846000	53010	1.9918e-06	53010	5.60989e-06	85770	2.37335e+06	56327	0.00181326	67170	344157	53390	4.10888e-08	64836	0.00371831	61003	1.63443	61003	0.583187	100640	9.40438e+06	50754	1.59371	91940
	44051	104347	87560	168662	87560	162288	87560	736023	57756	1.82002e+06	90700	187823	90700	999042	47269	0.0215085	47269	1.51913e-07	66700	431818	50165	2.22026e-05	68080	97999.1	68080	850809	53040	2.05689e-06	53040	5.77831e-06	85800	2.38449e+06	56357	0.00186372	67200	346548	53410	4.22677e-08	64856	0.00376202	61023	1.64596	61023	0.587882	100660	9.42655e+06	50774	1.60987	91960
	44071	105040	87580	169399	87580	162949	87580	739205	57776	1.83614e+06	90720	189142	90720	1.00376e+06	47289	0.0219752	47289	1.58538e-07	66720	434214	50185	2.27748e-05	68100	98377.8	68100	855642	53070	2.12398e-06	53070	5.95151e-06	85830	2.39567e+06	56387	0.00191551	67230	348953	53430	4.34788e-08	64876	0.00380622	61043	1.65757	61043	0.592612	100680	9.44876e+06	50794	1.62617	91980
	44091	105738	87600	170138	87600	163613	87600	742398	57796	1.85238e+06	90740	190470	90740	1.0085e+06	47309	0.0224513	47309	1.65433e-07	66740	436623	50205	2.33609e-05	68120	98757.8	68120	860499	53100	2.19315e-06	53100	6.12961e-06	85860	2.40689e+06	56417	0.00196866	67260	351373	53450	4.47229e-08	64896	0.0038509	61063	1.66925	61063	0.597378	100700	9.47102e+06	50814	1.64263	92000
	44111	106439	87620	170880	87620	164279	87620	745604	57816	1.86876e+06	90760	191806	90760	1.01326e+06	47329	0.022937	47329	1.72608e-07	66760	439043	50225	2.39613e-05	68140	99139	68140	865381	53130	2.26446e-06	53130	6.31276e-06	85890	2.41816e+06	56447	0.00202319	67290	353807	53470	4.60008e-08	64916	0.00389608	61083	1.681	61083	0.602178	100720	9.49333e+06	50834	1.65924	92020
	44131	107144	87640	171624	87640	164948	87640	748822	57836	1.88527e+06	90780	193151	90780	1.01804e+06	47349	0.0234325	47349	1.80072e-07	66780	441475	50245	2.45762e-05	68160	99521.4	68160	870289	53160	2.33796e-06	53160	6.50108e-06	85920	2.42948e+06	56477	0.00207914	67320	356257	53490	4.73134e-08	64936	0.00394175	61103	1.69283	61103	0.607014	100740	9.51568e+06	50854	1.676	92040
	44151	107853	87660	172372	87660	165618	87660	752053	57856	1.90191e+06	90800	194505	90800	1.02283e+06	47369	0.023938	47369	1.87838e-07	66800	443919	50265	2.52061e-05	68180	99905.2	68180	875221	53190	2.41372e-06	53190	6.69472e-06	85950	2.44084e+06	56507	0.00213656	67350	358721	53510	4.86617e-08	64956	0.00398793	61123	1.70473	61123	0.611886	100760	9.53807e+06	50874	1.69292	92060
	44171	108566	87680	173123	87680	166292	87680	755296	57876	1.91869e+06	90820	195867	90820	1.02765e+06	47389	0.0244537	47389	1.95917e-07	66820	446376	50285	2.58512e-05	68200	100290	68200	880178	53220	2.4918e-06	53220	6.89381e-06	85980	2.45225e+06	56537	0.00219547	67380	361200	53530	5.00465e-08	64976	0.00403462	61143	1.71672	61143	0.616794	100780	9.56051e+06	50894	1.71	92080
	44191	109284	87700	173876	87700	166968	87700	758552	57896	1.9356e+06	90840	197238	90840	1.03249e+06	47409	0.0249797	47409	2.04318e-07	66840	448844	50305	2.65118e-05	68220	100676	68220	885161	53250	2.57228e-06	53250	7.09849e-06	86010	2.46371e+06	56567	0.0022559	67410	363694	53550	5.14688e-08	64996	0.00408183	61163	1.72877	61163	0.621739	100800	9.583e+06	50914	1.72724	92100
	44211	110005	87720	174633	87720	167646	87720	761820	57916	1.95265e+06	90860	198619	90860	1.03736e+06	47429	0.0255163	47429	2.13057e-07	66860	451324	50325	2.71884e-05	68240	101064	68240	890169	53280	2.65522e-06	53280	7.30893e-06	86040	2.47521e+06	56597	0.00231791	67440	366204	53570	5.29295e-08	65016	0.00412955	61183	1.74091	61183	0.62672	100820	9.60553e+06	50934	1.74464	92120
	44231	110731	87740	175392	87740	168327	87740	765101	57936	1.96984e+06	90880	200008	90880	1.04224e+06	47449	0.0260636	47449	2.22144e-07	66880	453817	50345	2.78813e-05	68260	101453	68260	895202	53310	2.74069e-06	53310	7.52526e-06	86070	2.48676e+06	56627	0.00238152	67470	368729	53590	5.44296e-08	65036	0.0041778	61203	1.75313	61203	0.631737	100840	9.62811e+06	50954	1.7622	92140
	44251	111461	87760	176155	87760	169010	87760	768394	57956	1.98716e+06	90900	201406	90900	1.04714e+06	47469	0.0266219	47469	2.31592e-07	66900	456321	50365	2.85909e-05	68280	101843	68280	900261	53340	2.82877e-06	53340	7.74765e-06	86100	2.49836e+06	56657	0.00244677	67500	371269	53610	5.59702e-08	65056	0.00422659	61223	1.76542	61223	0.636792	100860	9.65073e+06	50974	1.77993	92160
	44271	112195	87780	176920	87780	169695	87780	771700	57976	2.00463e+06	90920	202813	90920	1.05206e+06	47489	0.0271913	47489	2.41415e-07	66920	458838	50385	2.93175e-05	68300	102234	68300	905345	53370	2.91953e-06	53370	7.97626e-06	86130	2.51e+06	56687	0.00251371	67530	373824	53630	5.75522e-08	65076	0.0042759	61243	1.77779	61243	0.641884	100880	9.67339e+06	50994	1.79781	92180
	44291	112933	87800	177688	87800	170384	87800	775019	57996	2.02223e+06	90940	204230	90940	1.05701e+06	47509	0.027772	47509	2.51628e-07	66940	461368	50405	3.00616e-05	68320	102627	68320	910456	53400	3.01305e-06	53400	8.21124e-06	86160	2.52169e+06	56717	0.00258238	67560	376395	53650	5.91767e-08	65096	0.00432576	61263	1.79024	61263	0.647013	100900	9.69611e+06	51014	1.81587	92200
	44311	113676	87820	178460	87820	171074	87820	778351	58016	2.03998e+06	90960	205655	90960	1.06197e+06	47529	0.0283643	47529	2.62242e-07	66960	463910	50425	3.08235e-05	68340	103021	68340	915592	53430	3.10941e-06	53430	8.45277e-06	86190	2.53343e+06	56747	0.00265281	67590	378982	53670	6.08449e-08	65116	0.00437617	61283	1.80277	61283	0.652181	100920	9.71886e+06	51034	1.83409	92220
	44331	114422	87840	179234	87840	171767	87840	781695	58036	2.05787e+06	90980	207090	90980	1.06696e+06	47549	0.0289684	47549	2.73275e-07	66980	466464	50445	3.16036e-05	68360	103417	68360	920754	53460	3.20868e-06	53460	8.70102e-06	86220	2.54522e+06	56777	0.00272505	67620	381584	53690	6.25578e-08	65136	0.00442713	61303	1.81538	61303	0.657386	100940	9.74167e+06	51054	1.85248	92240
	44351	115173	87860	180011	87860	172463	87860	785052	58056	2.07591e+06	91000	208534	91000	1.07197e+06	47569	0.0295845	47569	2.84742e-07	67000	469030	50465	3.24024e-05	68380	103813	68380	925943	53490	3.31096e-06	53490	8.95616e-06	86250	2.55705e+06	56807	0.00279914	67650	384201	53710	6.43165e-08	65156	0.00447865	61323	1.82807	61323	0.66263	100960	9.76452e+06	51074	1.87104	92260
	44371	115929	87880	180791	87880	173161	87880	788422	58076	2.09408e+06	91020	209988	91020	1.07699e+06	47589	0.0302128	47589	2.96657e-07	67020	471609	50485	3.32202e-05	68400	104211	68400	931158	53520	3.41632e-06	53520	9.21837e-06	86280	2.56893e+06	56837	0.00287513	67680	386835	53730	6.61222e-08	65176	0.00453073	61343	1.84084	61343	0.667912	100980	9.78742e+06	51094	1.88978	92280
	44391	116688	87900	181575	87900	173861	87900	791805	58096	2.11241e+06	91040	211450	91040	1.08204e+06	47609	0.0308536	47609	3.09037e-07	67040	474201	50505	3.40575e-05	68420	104610	68420	936399	53550	3.52486e-06	53550	9.48785e-06	86310	2.58086e+06	56867	0.00295306	67710	389484	53750	6.79762e-08	65196	0.00458339	61363	1.8537	61363	0.673233	101000	9.81036e+06	51114	1.90868	92300
	44411	117452	87920	182361	87920	174564	87920	795201	58116	2.13088e+06	91060	212923	91060	1.08712e+06	47629	0.031507	47629	3.219e-07	67060	476805	50525	3.49147e-05	68440	105011	68440	941666	53580	3.63667e-06	53580	9.76477e-06	86340	2.59284e+06	56897	0.00303299	67740	392150	53770	6.98796e-08	65216	0.00463661	61383	1.86663	61383	0.678593	101020	9.83335e+06	51134	1.92776	92320
	44431	118221	87940	183151	87940	175270	87940	798610	58136	2.1495e+06	91080	214404	91080	1.09221e+06	47649	0.0321733	47649	3.35262e-07	67080	479422	50545	3.57923e-05	68460	105413	68460	946961	53610	3.75183e-06	53610	1.00493e-05	86370	2.60486e+06	56927	0.00311495	67770	394831	53790	7.18336e-08	65236	0.00469043	61403	1.87965	61403	0.683993	101040	9.85638e+06	51154	1.94702	92340
	44451	118993	87960	183943	87960	175978	87960	802032	58156	2.16827e+06	91100	215896	91100	1.09732e+06	47669	0.0328527	47669	3.49142e-07	67100	482052	50565	3.66907e-05	68480	105816	68480	952282	53640	3.87045e-06	53640	1.03417e-05	86400	2.61694e+06	56957	0.003199	67800	397529	53810	7.38397e-08	65256	0.00474483	61423	1.89275	61423	0.689432	101060	9.87946e+06	51174	1.96646	92360
	44471	119770	87980	184739	87980	176689	87980	805467	58176	2.18719e+06	91120	217397	91120	1.10246e+06	47689	0.0335455	47689	3.63559e-07	67120	484695	50585	3.76104e-05	68500	106221	68500	957629	53670	3.99262e-06	53670	1.06422e-05	86430	2.62906e+06	56987	0.00328518	67830	400242	53830	7.5899e-08	65276	0.00479982	61443	1.90594	61443	0.694911	101080	9.90259e+06	51194	1.98607	92380
	44491	120552	88000	185537	88000	177402	88000	808915	58196	2.20625e+06	91140	218908	91140	1.10762e+06	47709	0.034252	47709	3.78531e-07	67140	487350	50605	3.85519e-05	68520	106626	68520	963004	53700	4.11845e-06	53700	1.09509e-05	86460	2.64124e+06	57017	0.00337355	67860	402973	53850	7.80129e-08	65296	0.00485541	61463	1.9192	61463	0.70043	101100	9.92576e+06	51214	2.00586	92400
	44511	121338	88020	186339	88020	178118	88020	812377	58216	2.22548e+06	91160	220428	91160	1.1128e+06	47729	0.0349723	47729	3.94078e-07	67160	490018	50625	3.95156e-05	68540	107034	68540	968406	53730	4.24803e-06	53730	1.12681e-05	86490	2.65346e+06	57047	0.00346416	67890	405719	53870	8.01828e-08	65316	0.00491161	61483	1.93256	61483	0.70599	101120	9.94898e+06	51234	2.02584	92420
	44531	122128	88040	187144	88040	178836	88040	815851	58236	2.24485e+06	91180	221958	91180	1.118e+06	47749	0.0357067	47749	4.10223e-07	67180	492700	50645	4.05021e-05	68560	107442	68560	973835	53760	4.38147e-06	53760	1.15939e-05	86520	2.66573e+06	57077	0.00355706	67920	408482	53890	8.24101e-08	65336	0.00496843	61503	1.94599	61503	0.71159	101140	9.97225e+06	51254	2.046	92440
	44551	122923	88060	187951	88060	179557	88060	819339	58256	2.26438e+06	91200	223498	91200	1.12322e+06	47769	0.0364555	47769	4.26984e-07	67200	495394	50665	4.15118e-05	68580	107852	68580	979292	53790	4.51887e-06	53790	1.19287e-05	86550	2.67805e+06	57107	0.0036523	67950	411261	53910	8.46962e-08	65356	0.00502586	61523	1.95952	61523	0.717231	101160	9.99556e+06	51274	2.06635	92460
	44571	123722	88080	188762	88080	180280	88080	822840	58276	2.28407e+06	91220	225048	91220	1.12847e+06	47789	0.0372189	47789	4.44385e-07	67220	498101	50685	4.25453e-05	68600	108263	68600	984775	53820	4.66037e-06	53820	1.22726e-05	86580	2.69042e+06	57137	0.00374995	67980	414057	53930	8.70427e-08	65376	0.00508392	61543	1.97313	61543	0.722914	101180	1.00189e+07	51294	2.08688	92480
	44591	124526	88100	189576	88100	181006	88100	826355	58296	2.30391e+06	91240	226608	91240	1.13374e+06	47809	0.0379972	47809	4.62448e-07	67240	500822	50705	4.3603e-05	68620	108676	68620	990287	53850	4.80605e-06	53850	1.26259e-05	86610	2.70284e+06	57167	0.00385006	68010	416870	53950	8.94509e-08	65396	0.0051426	61563	1.98682	61563	0.728637	101200	1.00423e+07	51314	2.1076	92500
	44611	125335	88120	190394	88120	181735	88120	829883	58316	2.32391e+06	91260	228178	91260	1.13903e+06	47829	0.0387907	47829	4.81197e-07	67260	503555	50725	4.46856e-05	68640	109090	68640	995826	53880	4.95605e-06	53880	1.29888e-05	86640	2.71531e+06	57197	0.00395268	68040	419699	53970	9.19225e-08	65416	0.00520193	61583	2.0006	61583	0.734403	101220	1.00658e+07	51334	2.12851	92520
	44631	126148	88140	191214	88140	182466	88140	833425	58336	2.34406e+06	91280	229758	91280	1.14434e+06	47849	0.0395997	47849	5.00655e-07	67280	506302	50745	4.57936e-05	68660	109505	68660	1.00139e+06	53910	5.11048e-06	53910	1.33615e-05	86670	2.72783e+06	57227	0.00405788	68070	422546	53990	9.44591e-08	65436	0.0052619	61603	2.01447	61603	0.740211	101240	1.00893e+07	51354	2.14961	92540
	44651	126965	88160	192038	88160	183200	88160	836979	58356	2.36438e+06	91300	231348	91300	1.14968e+06	47869	0.0404243	47869	5.20849e-07	67300	509062	50765	4.69275e-05	68680	109922	68680	1.00699e+06	53940	5.26947e-06	53940	1.37444e-05	86700	2.7404e+06	57257	0.00416572	68100	425409	54010	9.70622e-08	65456	0.00532252	61623	2.02843	61623	0.746061	101260	1.01128e+07	51374	2.17091	92560
	44671	127787	88180	192864	88180	183937	88180	840548	58376	2.38486e+06	91320	232949	91320	1.15503e+06	47889	0.041265	47889	5.41803e-07	67320	511836	50785	4.80879e-05	68700	110340	68700	1.01261e+06	53970	5.43315e-06	53970	1.41376e-05	86730	2.75302e+06	57287	0.00427626	68130	428290	54030	9.97336e-08	65476	0.0053838	61643	2.04248	61643	0.751954	101280	1.01364e+07	51394	2.1924	92580
	44691	128614	88200	193694	88200	184676	88200	844130	58396	2.40551e+06	91340	234559	91340	1.16041e+06	47909	0.042122	47909	5.63544e-07	67340	514623	50805	4.92753e-05	68720	110759	68720	1.01826e+06	54000	5.60164e-06	54000	1.45415e-05	86760	2.76569e+06	57317	0.00438955	68160	431187	54050	1.02475e-07	65496	0.00544574	61663	2.05661	61663	0.757889	101300	1.01601e+07	51414	2.21409	92600
	44711	129446	88220	194527	88220	185417	88220	847726	58416	2.42631e+06	91360	236181	91360	1.16582e+06	47929	0.0429955	47929	5.86102e-07	67360	517423	50825	5.04905e-05	68740	111180	68740	1.02394e+06	54030	5.77507e-06	54030	1.49563e-05	86790	2.77841e+06	57347	0.00450568	68190	434102	54070	1.05288e-07	65516	0.00550836	61683	2.07083	61683	0.763868	101320	1.01837e+07	51434	2.23597	92620
	44731	130282	88240	195364	88240	186162	88240	851335	58436	2.44728e+06	91380	237812	91380	1.17124e+06	47949	0.0438859	47949	6.09501e-07	67380	520237	50845	5.1734e-05	68760	111602	68760	1.02965e+06	54060	5.9536e-06	54060	1.53822e-05	86820	2.79119e+06	57377	0.00462469	68220	437034	54090	1.08174e-07	65536	0.00557165	61703	2.08515	61703	0.76989	101340	1.02075e+07	51454	2.25805	92640
	44751	131123	88260	196203	88260	186909	88260	854958	58456	2.46842e+06	91400	239454	91400	1.17669e+06	47969	0.0447936	47969	6.33773e-07	67400	523064	50865	5.30063e-05	68780	112025	68780	1.03539e+06	54090	6.13735e-06	54090	1.58197e-05	86850	2.80401e+06	57407	0.00474667	68250	439983	54110	1.11136e-07	65556	0.00563562	61723	2.09955	61723	0.775956	101360	1.02313e+07	51474	2.28034	92660
	44771	131968	88280	197046	88280	187658	88280	858595	58476	2.48972e+06	91420	241106	91420	1.18216e+06	47989	0.0457187	47989	6.58949e-07	67420	525905	50885	5.43082e-05	68800	112450	68800	1.04115e+06	54120	6.32646e-06	54120	1.62689e-05	86880	2.81689e+06	57437	0.00487168	68280	442950	54130	1.14174e-07	65576	0.00570029	61743	2.11405	61743	0.782066	101380	1.02551e+07	51494	2.30283	92680
	44791	132819	88300	197892	88300	188411	88300	862246	58496	2.51119e+06	91440	242769	91440	1.18766e+06	48009	0.0466616	48009	6.85059e-07	67440	528760	50905	5.56403e-05	68820	112877	68820	1.04695e+06	54150	6.5211e-06	54150	1.67301e-05	86910	2.82981e+06	57467	0.00499979	68310	445935	54150	1.17292e-07	65596	0.00576566	61763	2.12863	61763	0.788221	101400	1.0279e+07	51514	2.32552	92700
	44811	133674	88320	198741	88320	189166	88320	865910	58516	2.53283e+06	91460	244443	91460	1.19317e+06	48029	0.0476226	48029	7.12135e-07	67460	531629	50925	5.70032e-05	68840	113304	68840	1.05277e+06	54180	6.72141e-06	54180	1.72038e-05	86940	2.84279e+06	57497	0.00513106	68340	448937	54170	1.20491e-07	65616	0.00583173	61783	2.14331	61783	0.79442	101420	1.03029e+07	51534	2.34842	92720
	44831	134534	88340	199593	88340	189924	88340	869589	58536	2.55465e+06	91480	246127	91480	1.19872e+06	48049	0.0486021	48049	7.40211e-07	67480	534511	50945	5.83977e-05	68860	113733	68860	1.05862e+06	54210	6.92754e-06	54210	1.769e-05	86970	2.85582e+06	57527	0.00526559	68370	451957	54190	1.23772e-07	65636	0.00589851	61803	2.15808	61803	0.800664	101440	1.03269e+07	51554	2.37153	92740
	44851	135398	88360	200449	88360	190684	88360	873281	58556	2.57663e+06	91500	247822	91500	1.20428e+06	48069	0.0496004	48069	7.69322e-07	67500	537407	50965	5.98243e-05	68880	114164	68880	1.0645e+06	54240	7.13966e-06	54240	1.81893e-05	87000	2.8689e+06	57557	0.00540343	68400	454995	54210	1.27139e-07	65656	0.00596602	61823	2.17295	61823	0.806953	101460	1.03509e+07	51574	2.39485	92760
	44871	136268	88380	201308	88380	191447	88380	876988	58576	2.59879e+06	91520	249528	91520	1.20987e+06	48089	0.0506178	48089	7.99501e-07	67520	540317	50985	6.12838e-05	68900	114596	68900	1.07041e+06	54270	7.35793e-06	54270	1.87019e-05	87030	2.88204e+06	57587	0.00554468	68430	458051	54230	1.30592e-07	65676	0.00603425	61843	2.1879	61843	0.813288	101480	1.0375e+07	51594	2.41838	92780
	44891	137142	88400	202170	88400	192213	88400	880708	58596	2.62112e+06	91540	251245	91540	1.21548e+06	48109	0.0516546	48109	8.30788e-07	67540	543241	51005	6.2777e-05	68920	115029	68920	1.07635e+06	54300	7.58252e-06	54300	1.92282e-05	87060	2.89523e+06	57617	0.0056894	68460	461124	54250	1.34135e-07	65696	0.00610321	61863	2.20296	61863	0.819668	101500	1.03991e+07	51614	2.44212	92800
	44911	138021	88420	203036	88420	192981	88420	884443	58616	2.64363e+06	91560	252973	91560	1.22111e+06	48129	0.0527112	48129	8.63219e-07	67560	546179	51025	6.43045e-05	68940	115463	68940	1.08232e+06	54330	7.8136e-06	54330	1.97685e-05	87090	2.90847e+06	57647	0.00583767	68490	464216	54270	1.37769e-07	65716	0.00617292	61883	2.2181	61883	0.826095	101520	1.04232e+07	51634	2.46608	92820
	44931	138906	88440	203905	88440	193753	88440	888192	58636	2.66631e+06	91580	254711	91580	1.22677e+06	48149	0.0537879	48149	8.96831e-07	67580	549131	51045	6.58671e-05	68960	115899	68960	1.08832e+06	54360	8.05134e-06	54360	2.03231e-05	87120	2.92176e+06	57677	0.00598959	68520	467326	54290	1.41497e-07	65736	0.00624338	61903	2.23334	61903	0.832568	101540	1.04475e+07	51654	2.49025	92840
	44951	139795	88460	204777	88460	194527	88460	891954	58656	2.68917e+06	91600	256461	91600	1.23245e+06	48169	0.0548852	48169	9.31669e-07	67600	552097	51065	6.74655e-05	68980	116337	68980	1.09435e+06	54390	8.29594e-06	54390	2.08924e-05	87150	2.9351e+06	57707	0.00614522	68550	470455	54310	1.45321e-07	65756	0.00631459	61923	2.24868	61923	0.839088	101560	1.04717e+07	51674	2.51465	92860
	44971	140689	88480	205652	88480	195303	88480	895732	58676	2.71222e+06	91620	258222	91620	1.23816e+06	48189	0.0560033	48189	9.6777e-07	67620	555078	51085	6.91005e-05	69000	116776	69000	1.10041e+06	54420	8.54757e-06	54420	2.14768e-05	87180	2.9485e+06	57737	0.00630467	68580	473601	54330	1.49243e-07	65776	0.00638657	61943	2.26411	61943	0.845655	101580	1.0496e+07	51694	2.53926	92880
	44991	141588	88500	206531	88500	196083	88500	899523	58696	2.73544e+06	91640	259994	91640	1.24389e+06	48209	0.0571426	48209	1.00518e-06	67640	558073	51105	7.0773e-05	69020	117216	69020	1.1065e+06	54450	8.80643e-06	54450	2.20766e-05	87210	2.96195e+06	57767	0.00646801	68610	476767	54350	1.53266e-07	65796	0.00645933	61963	2.27964	61963	0.852269	101600	1.05204e+07	51714	2.5641	92900
	45011	142492	88520	207414	88520	196865	88520	903329	58716	2.75884e+06	91660	261778	91660	1.24964e+06	48229	0.0583035	48229	1.04394e-06	67660	561082	51125	7.24836e-05	69040	117658	69040	1.11262e+06	54480	9.07272e-06	54480	2.26923e-05	87240	2.97546e+06	57797	0.00663533	68640	479951	54370	1.57392e-07	65816	0.00653286	61983	2.29527	61983	0.858931	101620	1.05448e+07	51734	2.58916	92920
	45031	143401	88540	208299	88540	197650	88540	907149	58736	2.78243e+06	91680	263573	91680	1.25542e+06	48249	0.0594864	48249	1.0841e-06	67680	564105	51145	7.42333e-05	69060	118101	69060	1.11877e+06	54510	9.34662e-06	54510	2.33242e-05	87270	2.98902e+06	57827	0.00680673	68670	483153	54390	1.61623e-07	65836	0.00660718	62003	2.31099	62003	0.865641	101640	1.05693e+07	51754	2.61445	92940
	45051	144315	88560	209188	88560	198438	88560	910983	58756	2.8062e+06	91700	265379	91700	1.26122e+06	48269	0.0606917	48269	1.1257e-06	67700	567143	51165	7.60228e-05	69080	118546	69080	1.12495e+06	54540	9.62836e-06	54540	2.39727e-05	87300	3.00263e+06	57857	0.00698229	68700	486374	54410	1.65963e-07	65856	0.00668229	62023	2.32682	62023	0.872399	101660	1.05938e+07	51774	2.63996	92960
	45071	145234	88580	210080	88580	199228	88580	914832	58776	2.83016e+06	91720	267197	91720	1.26705e+06	48289	0.0619197	48289	1.16879e-06	67720	570195	51185	7.78531e-05	69100	118992	69100	1.13116e+06	54570	9.91813e-06	54570	2.46383e-05	87330	3.01629e+06	57887	0.00716212	68730	489614	54430	1.70413e-07	65876	0.00675821	62043	2.34274	62043	0.879206	101680	1.06183e+07	51794	2.66571	92980
	45091	146158	88600	210976	88600	200022	88600	918696	58796	2.85431e+06	91740	269026	91740	1.2729e+06	48309	0.0631709	48309	1.21343e-06	67740	573262	51205	7.9725e-05	69120	119439	69120	1.1374e+06	54600	1.02162e-05	54600	2.53213e-05	87360	3.03001e+06	57917	0.00734631	68760	492873	54450	1.74977e-07	65896	0.00683494	62063	2.35876	62063	0.886062	101700	1.06429e+07	51814	2.69168	93000
	45111	147087	88620	211875	88620	200818	88620	922574	58816	2.87864e+06	91760	270867	91760	1.27877e+06	48329	0.0644456	48329	1.25966e-06	67760	576344	51225	8.16393e-05	69140	119888	69140	1.14368e+06	54630	1.05227e-05	54630	2.60223e-05	87390	3.04379e+06	57947	0.00753496	68790	496152	54470	1.79657e-07	65916	0.00691249	62083	2.37488	62083	0.892967	101720	1.06676e+07	51834	2.71789	93020
	45131	148022	88640	212778	88640	201617	88640	926467	58836	2.90316e+06	91780	272719	91780	1.28467e+06	48349	0.0657443	48349	1.30753e-06	67780	579440	51245	8.3597e-05	69160	120338	69160	1.14998e+06	54660	1.08379e-05	54660	2.67416e-05	87420	3.05762e+06	57977	0.00772817	68820	499449	54490	1.84456e-07	65936	0.00699087	62103	2.3911	62103	0.899921	101740	1.06923e+07	51854	2.74434	93040
	45151	148961	88660	213684	88660	202419	88660	930374	58856	2.92788e+06	91800	274584	91800	1.29059e+06	48369	0.0670674	48369	1.35711e-06	67800	582551	51265	8.55991e-05	69180	120790	69180	1.15631e+06	54690	1.11621e-05	54690	2.74796e-05	87450	3.0715e+06	58007	0.00792605	68850	502765	54510	1.89378e-07	65956	0.00707009	62123	2.40743	62123	0.906926	101760	1.0717e+07	51874	2.77102	93060
	45171	149906	88680	214593	88680	203223	88680	934296	58876	2.95279e+06	91820	276460	91820	1.29654e+06	48389	0.0684153	48389	1.40844e-06	67820	585676	51285	8.76464e-05	69200	121244	69200	1.16268e+06	54720	1.14954e-05	54720	2.8237e-05	87480	3.08544e+06	58037	0.00812869	68880	506101	54530	1.94423e-07	65976	0.00715015	62143	2.42385	62143	0.913981	101780	1.07418e+07	51894	2.79794	93080
	45191	150856	88700	215506	88700	204031	88700	938233	58896	2.97789e+06	91840	278348	91840	1.30252e+06	48409	0.0697885	48409	1.46159e-06	67840	588817	51305	8.97399e-05	69220	121698	69220	1.16908e+06	54750	1.18382e-05	54750	2.9014e-05	87510	3.09943e+06	58067	0.00833621	68910	509456	54550	1.99597e-07	65996	0.00723106	62163	2.44038	62163	0.921086	101800	1.07666e+07	51914	2.82511	93100
	45211	151812	88720	216423	88720	204841	88720	942184	58916	3.00318e+06	91860	280248	91860	1.30852e+06	48429	0.0711873	48429	1.51662e-06	67860	591973	51325	9.18806e-05	69240	122155	69240	1.17551e+06	54780	1.21906e-05	54780	2.98113e-05	87540	3.11348e+06	58097	0.00854871	68940	512831	54570	2.04902e-07	66016	0.00731284	62183	2.45701	62183	0.928242	101820	1.07915e+07	51934	2.85251	93120
	45231	152772	88740	217342	88740	205654	88740	946151	58936	3.02868e+06	91880	282160	91880	1.31454e+06	48449	0.0726122	48449	1.57358e-06	67880	595143	51345	9.40695e-05	69260	122612	69260	1.18197e+06	54810	1.2553e-05	54810	3.06292e-05	87570	3.12759e+06	58127	0.00876632	68970	516225	54590	2.10341e-07	66036	0.00739548	62203	2.47374	62203	0.93545	101840	1.08165e+07	51954	2.88017	93140
	45251	153738	88760	218266	88760	206470	88760	950132	58956	3.05437e+06	91900	284084	91900	1.32059e+06	48469	0.0740637	48469	1.63254e-06	67900	598329	51365	9.63077e-05	69280	123071	69280	1.18846e+06	54840	1.29255e-05	54840	3.14684e-05	87600	3.14175e+06	58157	0.00898914	69000	519640	54610	2.15917e-07	66056	0.00747901	62223	2.49058	62223	0.942709	101860	1.08415e+07	51974	2.90807	93160
	45271	154709	88780	219192	88780	207289	88780	954129	58976	3.08026e+06	91920	286020	91920	1.32666e+06	48489	0.0755423	48489	1.69357e-06	67920	601529	51385	9.85961e-05	69300	123532	69300	1.19499e+06	54870	1.33086e-05	54870	3.23293e-05	87630	3.15596e+06	58187	0.00921729	69030	523073	54630	2.21633e-07	66076	0.00756342	62243	2.50753	62243	0.950019	101880	1.08665e+07	51994	2.93622	93180
	45291	155685	88800	220123	88800	208111	88800	958140	58996	3.10635e+06	91940	287969	91940	1.33276e+06	48509	0.0770483	48509	1.75674e-06	67940	604745	51405	0.000100936	69320	123994	69320	1.20154e+06	54900	1.37024e-05	54900	3.32125e-05	87660	3.17023e+06	58217	0.00945089	69060	526527	54650	2.27494e-07	66096	0.00764873	62263	2.52457	62263	0.957383	101900	1.08916e+07	52014	2.96462	93200
	45311	156667	88820	221057	88820	208935	88820	962166	59016	3.13265e+06	91960	289929	91960	1.33888e+06	48529	0.0785823	48529	1.8221e-06	67960	607976	51425	0.000103328	69340	124458	69340	1.20813e+06	54930	1.41072e-05	54930	3.41184e-05	87690	3.18456e+06	58247	0.00969007	69090	530001	54670	2.33502e-07	66116	0.00773494	62283	2.54173	62283	0.964798	101920	1.09168e+07	52034	2.99327	93220
	45331	157654	88840	221994	88840	209763	88840	966208	59036	3.15914e+06	91980	291903	91980	1.34503e+06	48549	0.0801448	48549	1.88974e-06	67980	611222	51445	0.000105774	69360	124923	69360	1.21475e+06	54960	1.45233e-05	54960	3.50477e-05	87720	3.19894e+06	58277	0.00993494	69120	533495	54690	2.3966e-07	66136	0.00782207	62303	2.55899	62303	0.972267	101940	1.0942e+07	52054	3.02218	93240
	45351	158647	88860	222935	88860	210593	88860	970264	59056	3.18585e+06	92000	293888	92000	1.35121e+06	48569	0.0817362	48569	1.95973e-06	68000	614484	51465	0.000108274	69380	125389	69380	1.22141e+06	54990	1.49511e-05	54990	3.6001e-05	87750	3.21339e+06	58307	0.0101856	69150	537009	54710	2.45974e-07	66156	0.00791012	62323	2.57635	62323	0.979789	101960	1.09672e+07	52074	3.05135	93260
	45371	159645	88880	223880	88880	211427	88880	974336	59076	3.21275e+06	92020	295886	92020	1.35741e+06	48589	0.0833571	48589	2.03214e-06	68020	617761	51485	0.00011083	69400	125857	69400	1.2281e+06	55020	1.53908e-05	55020	3.69787e-05	87780	3.22788e+06	58337	0.0104423	69180	540544	54730	2.52445e-07	66176	0.00799911	62343	2.59383	62343	0.987364	101980	1.09925e+07	52094	3.08077	93280
	45391	160648	88900	224828	88900	212263	88900	978423	59096	3.23987e+06	92040	297897	92040	1.36364e+06	48609	0.0850079	48609	2.10706e-06	68040	621054	51505	0.000113443	69420	126327	69420	1.23482e+06	55050	1.58427e-05	55050	3.79815e-05	87810	3.24244e+06	58367	0.010705	69210	544099	54750	2.59078e-07	66196	0.00808904	62363	2.61141	62363	0.994994	102000	1.10178e+07	52114	3.11046	93300
	45411	161657	88920	225779	88920	213102	88920	982526	59116	3.2672e+06	92060	299921	92060	1.36989e+06	48629	0.0866892	48629	2.18455e-06	68060	624362	51525	0.000116114	69440	126798	69440	1.24157e+06	55080	1.63072e-05	55080	3.901e-05	87840	3.25705e+06	58397	0.010974	69240	547674	54770	2.65877e-07	66216	0.00817992	62383	2.6291	62383	1.00268	102020	1.10432e+07	52134	3.14042	93320
	45431	162671	88940	226735	88940	213944	88940	986644	59136	3.29474e+06	92080	301957	92080	1.37617e+06	48649	0.0884014	48649	2.26472e-06	68080	627686	51545	0.000118845	69460	127271	69460	1.24836e+06	55110	1.67846e-05	55110	4.00649e-05	87870	3.27172e+06	58427	0.0112493	69270	551270	54790	2.72846e-07	66236	0.00827176	62403	2.64691	62403	1.01042	102040	1.10687e+07	52154	3.17063	93340
	45451	163691	88960	227693	88960	214789	88960	990777	59156	3.32248e+06	92100	304006	92100	1.38247e+06	48669	0.0901452	48669	2.34764e-06	68100	631025	51565	0.000121636	69480	127745	69480	1.25517e+06	55140	1.72752e-05	55140	4.11467e-05	87900	3.28644e+06	58457	0.0115311	69300	554887	54810	2.79988e-07	66256	0.00836457	62423	2.66482	62423	1.01821	102060	1.10942e+07	52174	3.20112	93360
	45471	164717	88980	228656	88980	215638	88980	994925	59176	3.35045e+06	92120	306068	92120	1.3888e+06	48689	0.091921	48689	2.43339e-06	68120	634380	51585	0.000124489	69500	128220	69500	1.26203e+06	55170	1.77793e-05	55170	4.22561e-05	87930	3.30123e+06	58487	0.0118196	69330	558524	54830	2.87308e-07	66276	0.00845836	62443	2.68284	62443	1.02606	102080	1.11197e+07	52194	3.23188	93380
	45491	165748	89000	229622	89000	216489	89000	999089	59196	3.37863e+06	92140	308143	92140	1.39516e+06	48709	0.0937293	48709	2.52208e-06	68140	637751	51605	0.000127405	69520	128698	69520	1.26891e+06	55200	1.82975e-05	55200	4.33937e-05	87960	3.31607e+06	58517	0.0121148	69360	562183	54850	2.9481e-07	66296	0.00855314	62463	2.70097	62463	1.03396	102100	1.11453e+07	52214	3.26291	93400
	45511	166785	89020	230592	89020	217343	89020	1.00327e+06	59216	3.40702e+06	92160	310230	92160	1.40154e+06	48729	0.0955709	48729	2.61379e-06	68160	641138	51625	0.000130385	69540	129176	69540	1.27583e+06	55230	1.88299e-05	55230	4.45603e-05	87990	3.33097e+06	58547	0.012417	69390	565862	54870	3.02499e-07	66316	0.00864892	62483	2.71922	62483	1.04192	102120	1.11709e+07	52234	3.29421	93420
	45531	167827	89040	231565	89040	218200	89040	1.00746e+06	59236	3.43564e+06	92180	312331	92180	1.40795e+06	48749	0.0974461	48749	2.70862e-06	68180	644541	51645	0.000133432	69560	129656	69560	1.28279e+06	55260	1.93769e-05	55260	4.57566e-05	88020	3.34592e+06	58577	0.0127263	69420	569563	54890	3.10377e-07	66336	0.0087457	62503	2.73758	62503	1.04994	102140	1.11966e+07	52254	3.3258	93440
	45551	168875	89060	232542	89060	219060	89060	1.01168e+06	59256	3.46447e+06	92200	314446	92200	1.41439e+06	48769	0.0993556	48769	2.80666e-06	68200	647959	51665	0.000136545	69580	130138	69580	1.28978e+06	55290	1.9939e-05	55290	4.69831e-05	88050	3.36094e+06	58607	0.0130429	69450	573285	54910	3.18452e-07	66356	0.00884351	62523	2.75605	62523	1.05801	102160	1.12224e+07	52274	3.35766	93460
	45571	169929	89080	233523	89080	219923	89080	1.0159e+06	59276	3.49352e+06	92220	316573	92220	1.42085e+06	48789	0.1013	48789	2.90803e-06	68220	651394	51685	0.000139728	69600	130621	69600	1.2968e+06	55320	2.05166e-05	55320	4.82408e-05	88080	3.37602e+06	58637	0.0133668	69480	577028	54930	3.26725e-07	66376	0.00894235	62543	2.77463	62543	1.06615	102180	1.12482e+07	52294	3.3898	93480
	45591	170988	89100	234507	89100	220789	89100	1.02014e+06	59296	3.5228e+06	92240	318714	92240	1.42734e+06	48809	0.10328	48809	3.01283e-06	68240	654845	51705	0.00014298	69620	131106	69620	1.30385e+06	55350	2.111e-05	55350	4.95302e-05	88110	3.39115e+06	58667	0.0136983	69510	580792	54950	3.35204e-07	66396	0.00904222	62563	2.79333	62563	1.07433	102200	1.1274e+07	52314	3.42223	93500
	45611	172053	89120	235495	89120	221658	89120	1.0244e+06	59316	3.5523e+06	92260	320868	92260	1.43385e+06	48829	0.105296	48829	3.12115e-06	68260	658312	51725	0.000146303	69640	131593	69640	1.31094e+06	55380	2.17196e-05	55380	5.08522e-05	88140	3.40634e+06	58697	0.0140376	69540	584578	54970	3.43891e-07	66416	0.00914315	62583	2.81214	62583	1.08258	102220	1.12999e+07	52334	3.45494	93520
	45631	173124	89140	236487	89140	222530	89140	1.02868e+06	59336	3.58203e+06	92280	323036	92280	1.4404e+06	48849	0.107348	48849	3.23313e-06	68280	661796	51745	0.0001497	69660	132080	69660	1.31807e+06	55410	2.23459e-05	55410	5.22076e-05	88170	3.42159e+06	58727	0.0143848	69570	588386	54990	3.52793e-07	66436	0.00924514	62603	2.83107	62603	1.09089	102240	1.13258e+07	52354	3.48794	93540
	45651	174200	89160	237483	89160	223405	89160	1.03297e+06	59356	3.61199e+06	92300	325217	92300	1.44697e+06	48869	0.109438	48869	3.34885e-06	68300	665295	51765	0.000153171	69680	132570	69680	1.32523e+06	55440	2.29893e-05	55440	5.35971e-05	88200	3.4369e+06	58757	0.01474	69600	592216	55010	3.61913e-07	66456	0.00934819	62623	2.85012	62623	1.09925	102260	1.13518e+07	52374	3.52123	93560
	45671	175283	89180	238482	89180	224283	89180	1.03727e+06	59376	3.64217e+06	92320	327412	92320	1.45356e+06	48889	0.111566	48889	3.46846e-06	68320	668811	51785	0.000156718	69700	133061	69700	1.33243e+06	55470	2.36502e-05	55470	5.50215e-05	88230	3.45228e+06	58787	0.0151035	69630	596067	55030	3.71258e-07	66476	0.00945233	62643	2.86928	62643	1.10767	102280	1.13779e+07	52394	3.55482	93580
	45691	176371	89200	239485	89200	225164	89200	1.04159e+06	59396	3.67259e+06	92340	329621	92340	1.46019e+06	48909	0.113732	48909	3.59206e-06	68340	672344	51805	0.000160342	69720	133553	69720	1.33966e+06	55500	2.43291e-05	55500	5.64817e-05	88260	3.46771e+06	58817	0.0154755	69660	599940	55050	3.80832e-07	66496	0.00955756	62663	2.88856	62663	1.11615	102300	1.1404e+07	52414	3.5887	93600
	45711	177465	89220	240492	89220	226048	89220	1.04593e+06	59416	3.70324e+06	92360	331843	92360	1.46684e+06	48929	0.115937	48929	3.71979e-06	68360	675893	51825	0.000164046	69740	134048	69740	1.34692e+06	55530	2.50264e-05	55530	5.79785e-05	88290	3.4832e+06	58847	0.015856	69690	603836	55070	3.90641e-07	66516	0.00966389	62683	2.90796	62683	1.1247	102320	1.14301e+07	52434	3.62288	93620
	45731	178565	89240	241503	89240	226936	89240	1.05029e+06	59436	3.73412e+06	92380	334080	92380	1.47352e+06	48949	0.118182	48949	3.85176e-06	68380	679459	51845	0.00016783	69760	134543	69760	1.35422e+06	55560	2.57427e-05	55560	5.95128e-05	88320	3.49875e+06	58877	0.0162454	69720	607753	55090	4.00691e-07	66536	0.00977133	62703	2.92748	62703	1.1333	102340	1.14563e+07	52454	3.65736	93640
	45751	179671	89260	242517	89260	227826	89260	1.05466e+06	59456	3.76524e+06	92400	336330	92400	1.48022e+06	48969	0.120468	48969	3.98812e-06	68400	683041	51865	0.000171697	69780	135041	69780	1.36156e+06	55590	2.64783e-05	55590	6.10854e-05	88350	3.51436e+06	58907	0.0166437	69750	611693	55110	4.10986e-07	66556	0.0098799	62723	2.94712	62723	1.14196	102360	1.14826e+07	52474	3.69214	93660
	45771	180783	89280	243535	89280	228720	89280	1.05904e+06	59476	3.79659e+06	92420	338595	92420	1.48696e+06	48989	0.122795	48989	4.129e-06	68420	686640	51885	0.000175647	69800	135539	69800	1.36893e+06	55620	2.72339e-05	55620	6.26973e-05	88380	3.53003e+06	58937	0.0170513	69780	615656	55130	4.21532e-07	66576	0.0099896	62743	2.96687	62743	1.15068	102380	1.15089e+07	52494	3.72723	93680
	45791	181901	89300	244557	89300	229616	89300	1.06345e+06	59496	3.82818e+06	92440	340873	92440	1.49372e+06	49009	0.125164	49009	4.27453e-06	68440	690256	51905	0.000179684	69820	136040	69820	1.37634e+06	55650	2.80099e-05	55650	6.43494e-05	88410	3.54576e+06	58967	0.0174682	69810	619640	55150	4.32336e-07	66596	0.0101005	62763	2.98675	62763	1.15947	102400	1.15353e+07	52514	3.76262	93700
	45811	183025	89320	245583	89320	230516	89320	1.06786e+06	59516	3.86002e+06	92460	343166	92460	1.50051e+06	49029	0.127575	49029	4.42486e-06	68460	693888	51925	0.000183808	69840	136542	69840	1.38378e+06	55680	2.88067e-05	55680	6.60426e-05	88440	3.56156e+06	58997	0.0178948	69840	623648	55170	4.43404e-07	66616	0.0102125	62783	3.00675	62783	1.16832	102420	1.15617e+07	52534	3.79832	93720
	45831	184155	89340	246613	89340	231419	89340	1.0723e+06	59536	3.89209e+06	92480	345473	92480	1.50733e+06	49049	0.13003	49049	4.58014e-06	68480	697538	51945	0.000188021	69860	137045	69860	1.39126e+06	55710	2.96251e-05	55710	6.77779e-05	88470	3.57741e+06	59027	0.0183311	69870	627678	55190	4.5474e-07	66636	0.0103256	62803	3.02687	62803	1.17722	102440	1.15881e+07	52554	3.83434	93740
	45851	185291	89360	247646	89360	232325	89360	1.07675e+06	59556	3.92441e+06	92500	347794	92500	1.51417e+06	49069	0.132528	49069	4.74052e-06	68500	701204	51965	0.000192326	69880	137551	69880	1.39877e+06	55740	3.04654e-05	55740	6.95562e-05	88500	3.59333e+06	59057	0.0187774	69900	631731	55210	4.66352e-07	66656	0.01044	62823	3.04712	62823	1.1862	102460	1.16146e+07	52574	3.87067	93760
	45871	186433	89380	248684	89380	233234	89380	1.08122e+06	59576	3.95698e+06	92520	350130	92520	1.52105e+06	49089	0.135071	49089	4.90615e-06	68520	704888	51985	0.000196723	69900	138057	69900	1.40633e+06	55770	3.13283e-05	55770	7.13787e-05	88530	3.6093e+06	59087	0.019234	69930	635806	55230	4.78247e-07	66676	0.0105555	62843	3.06749	62843	1.19523	102480	1.16412e+07	52594	3.90732	93780
	45891	187581	89400	249725	89400	234146	89400	1.08571e+06	59596	3.98979e+06	92540	352481	92540	1.52795e+06	49109	0.13766	49109	5.07721e-06	68540	708589	52005	0.000201216	69920	138566	69920	1.41392e+06	55800	3.22144e-05	55800	7.32462e-05	88560	3.62534e+06	59117	0.019701	69960	639905	55250	4.90429e-07	66696	0.0106723	62863	3.08798	62863	1.20433	102500	1.16678e+07	52614	3.94429	93800
	45911	188735	89420	250770	89420	235062	89420	1.09021e+06	59616	4.02285e+06	92560	354846	92560	1.53488e+06	49129	0.140295	49129	5.25384e-06	68560	712307	52025	0.000205805	69940	139076	69940	1.42154e+06	55830	3.31241e-05	55830	7.51599e-05	88590	3.64144e+06	59147	0.0201787	69990	644027	55270	5.02907e-07	66716	0.0107902	62883	3.1086	62883	1.21349	102520	1.16945e+07	52634	3.98158	93820
	45931	189896	89440	251819	89440	235980	89440	1.09472e+06	59636	4.05616e+06	92580	357225	92580	1.54184e+06	49149	0.142977	49149	5.43623e-06	68580	716042	52045	0.000210493	69960	139587	69960	1.4292e+06	55860	3.40582e-05	55860	7.71209e-05	88620	3.65761e+06	59177	0.0206673	70020	648173	55290	5.15686e-07	66736	0.0109094	62903	3.12934	62903	1.22272	102540	1.17212e+07	52654	4.0192	93840
	45951	191063	89460	252872	89460	236902	89460	1.09926e+06	59656	4.08973e+06	92600	359620	92600	1.54882e+06	49169	0.145707	49169	5.62454e-06	68600	719794	52065	0.000215282	69980	140101	69980	1.4369e+06	55890	3.50172e-05	55890	7.91301e-05	88650	3.67383e+06	59207	0.021167	70050	652341	55310	5.28775e-07	66756	0.0110299	62923	3.15021	62923	1.23201	102560	1.1748e+07	52674	4.05714	93860
	45971	192235	89480	253929	89480	237827	89480	1.10381e+06	59676	4.12354e+06	92620	362029	92620	1.55584e+06	49189	0.148485	49189	5.81896e-06	68620	723564	52085	0.000220174	70000	140615	70000	1.44464e+06	55920	3.60017e-05	55920	8.11888e-05	88680	3.69012e+06	59237	0.021678	70080	656534	55330	5.42179e-07	66776	0.0111515	62943	3.17121	62943	1.24136	102580	1.17748e+07	52694	4.09542	93880
	45991	193415	89500	254990	89500	238755	89500	1.10838e+06	59696	4.15762e+06	92640	364454	92640	1.56288e+06	49209	0.151312	49209	6.01967e-06	68640	727352	52105	0.00022517	70020	141132	70020	1.45241e+06	55950	3.70125e-05	55950	8.32981e-05	88710	3.70647e+06	59267	0.0222007	70110	660749	55350	5.55906e-07	66796	0.0112745	62963	3.19233	62963	1.25078	102600	1.18017e+07	52714	4.13402	93900
	46011	194600	89520	256055	89520	239687	89520	1.11296e+06	59716	4.19195e+06	92660	366893	92660	1.56996e+06	49229	0.15419	49229	6.22686e-06	68660	731157	52125	0.000230273	70040	141650	70040	1.46022e+06	55980	3.80501e-05	55980	8.54592e-05	88740	3.72288e+06	59297	0.0227353	70140	664989	55370	5.69964e-07	66816	0.0113987	62983	3.21359	62983	1.26027	102620	1.18286e+07	52734	4.17297	93920
	46031	195792	89540	257123	89540	240621	89540	1.11757e+06	59736	4.22654e+06	92680	369348	92680	1.57706e+06	49249	0.157119	49249	6.44072e-06	68680	734979	52145	0.000235486	70060	142170	70060	1.46807e+06	56010	3.91152e-05	56010	8.76732e-05	88770	3.73936e+06	59327	0.0232819	70170	669252	55390	5.84359e-07	66836	0.0115242	63003	3.23497	63003	1.26982	102640	1.18556e+07	52754	4.21225	93940
	46051	196990	89560	258196	89560	241559	89560	1.12219e+06	59756	4.26139e+06	92700	371818	92700	1.58419e+06	49269	0.160099	49269	6.66147e-06	68700	738819	52165	0.00024081	70080	142691	70080	1.47596e+06	56040	4.02085e-05	56040	8.99414e-05	88800	3.7559e+06	59357	0.0238409	70200	673540	55410	5.99101e-07	66856	0.011651	63023	3.25648	63023	1.27944	102660	1.18826e+07	52774	4.25187	93960
	46071	198194	89580	259273	89580	242500	89580	1.12682e+06	59776	4.2965e+06	92720	374303	92720	1.59135e+06	49289	0.163132	49289	6.88929e-06	68720	742677	52185	0.000246248	70100	143214	70100	1.48389e+06	56070	4.13308e-05	56070	9.22651e-05	88830	3.7725e+06	59387	0.0244125	70230	677851	55430	6.14196e-07	66876	0.0117791	63043	3.27812	63043	1.28913	102680	1.19097e+07	52794	4.29184	93980
	46091	199405	89600	260354	89600	243445	89600	1.13148e+06	59796	4.33188e+06	92740	376803	92740	1.59854e+06	49309	0.166219	49309	7.12441e-06	68740	746553	52205	0.000251801	70120	143739	70120	1.49185e+06	56100	4.24827e-05	56100	9.46454e-05	88860	3.78917e+06	59417	0.0249971	70260	682186	55450	6.29653e-07	66896	0.0119086	63063	3.2999	63063	1.29888	102700	1.19369e+07	52814	4.33215	94000
	46111	200622	89620	261438	89620	244392	89620	1.13615e+06	59816	4.36753e+06	92760	379319	92760	1.60576e+06	49329	0.16936	49329	7.36704e-06	68760	750447	52225	0.000257473	70140	144265	70140	1.49985e+06	56130	4.36649e-05	56130	9.70837e-05	88890	3.8059e+06	59447	0.0255948	70290	686546	55470	6.45479e-07	66916	0.0120394	63083	3.3218	63083	1.3087	102720	1.19641e+07	52834	4.37281	94020
	46131	201846	89640	262527	89640	245343	89640	1.14083e+06	59836	4.40344e+06	92780	381851	92780	1.61301e+06	49349	0.172556	49349	7.61741e-06	68780	754359	52245	0.000263265	70160	144793	70160	1.50789e+06	56160	4.48783e-05	56160	9.95814e-05	88920	3.8227e+06	59477	0.0262059	70320	690931	55490	6.61684e-07	66936	0.0121715	63103	3.34384	63103	1.31859	102740	1.19913e+07	52854	4.41382	94040
	46151	203076	89660	263620	89660	246297	89660	1.14554e+06	59856	4.43962e+06	92800	384398	92800	1.62028e+06	49369	0.175808	49369	7.87574e-06	68800	758288	52265	0.00026918	70180	145323	70180	1.51597e+06	56190	4.61236e-05	56190	0.00010214	88950	3.83956e+06	59507	0.0268308	70350	695339	55510	6.78275e-07	66956	0.012305	63123	3.36601	63123	1.32855	102760	1.20186e+07	52874	4.45519	94060
	46171	204312	89680	264717	89680	247255	89680	1.15026e+06	59876	4.47607e+06	92820	386961	92820	1.62759e+06	49389	0.179118	49389	8.14228e-06	68820	762236	52285	0.000275221	70200	145854	70200	1.52409e+06	56220	4.74016e-05	56220	0.00010476	88980	3.85648e+06	59537	0.0274696	70380	699773	55530	6.95262e-07	66976	0.0124399	63143	3.38832	63143	1.33858	102780	1.2046e+07	52894	4.49692	94080
	46191	205556	89700	265818	89700	248215	89700	1.155e+06	59896	4.5128e+06	92840	389540	92840	1.63493e+06	49409	0.182485	49409	8.41726e-06	68840	766202	52305	0.000281389	70220	146387	70220	1.53224e+06	56250	4.87132e-05	56250	0.000107444	89010	3.87347e+06	59567	0.0281228	70410	704231	55550	7.12654e-07	66996	0.0125761	63163	3.41076	63163	1.34868	102800	1.20734e+07	52914	4.539	94100
	46211	206805	89720	266923	89720	249179	89720	1.15976e+06	59916	4.54981e+06	92860	392134	92860	1.6423e+06	49429	0.185912	49429	8.70094e-06	68860	770187	52325	0.000287688	70240	146921	70240	1.54044e+06	56280	5.0059e-05	56280	0.000110193	89040	3.89053e+06	59597	0.0287906	70440	708714	55570	7.30459e-07	67016	0.0127138	63183	3.43333	63183	1.35885	102820	1.21008e+07	52934	4.58145	94120
	46231	208061	89740	268032	89740	250147	89740	1.16453e+06	59936	4.58709e+06	92880	394745	92880	1.64969e+06	49449	0.189398	49449	8.99357e-06	68880	774189	52345	0.00029412	70260	147458	70260	1.54867e+06	56310	5.144e-05	56310	0.000113008	89070	3.90765e+06	59627	0.0294733	70470	713222	55590	7.48687e-07	67036	0.0128529	63203	3.45605	63203	1.36909	102840	1.21283e+07	52954	4.62427	94140
	46251	209324	89760	269145	89760	251117	89760	1.16932e+06	59956	4.62465e+06	92900	397372	92900	1.65712e+06	49469	0.192946	49469	9.29541e-06	68900	778210	52365	0.000300688	70280	147996	70280	1.55695e+06	56340	5.28571e-05	56340	0.000115892	89100	3.92483e+06	59657	0.0301713	70500	717755	55610	7.67348e-07	67056	0.0129934	63223	3.4789	63223	1.3794	102860	1.21559e+07	52974	4.66745	94160
	46271	210594	89780	270262	89780	252091	89780	1.17413e+06	59976	4.66249e+06	92920	400015	92920	1.66458e+06	49489	0.196555	49489	9.60674e-06	68920	782250	52385	0.000307394	70300	148535	70300	1.56526e+06	56370	5.43111e-05	56370	0.000118844	89130	3.94209e+06	59687	0.0308848	70530	722314	55630	7.86451e-07	67076	0.0131354	63243	3.50188	63243	1.38978	102880	1.21835e+07	52994	4.71101	94180
	46291	211870	89800	271384	89800	253069	89800	1.17896e+06	59996	4.70061e+06	92940	402674	92940	1.67207e+06	49509	0.200227	49509	9.92784e-06	68940	786308	52405	0.000314241	70320	149077	70320	1.57361e+06	56400	5.5803e-05	56400	0.000121868	89160	3.9594e+06	59717	0.0316141	70560	726897	55650	8.06006e-07	67096	0.0132788	63263	3.52501	63263	1.40023	102900	1.22112e+07	53014	4.75494	94200
	46311	213153	89820	272509	89820	254049	89820	1.1838e+06	60016	4.73902e+06	92960	405350	92960	1.67958e+06	49529	0.203963	49529	1.0259e-05	68960	790384	52425	0.000321232	70340	149620	70340	1.58201e+06	56430	5.73336e-05	56430	0.000124964	89190	3.97679e+06	59747	0.0323597	70590	731506	55670	8.26023e-07	67116	0.0134237	63283	3.54828	63283	1.41076	102920	1.22389e+07	53034	4.79925	94220
	46331	214443	89840	273639	89840	255033	89840	1.18867e+06	60036	4.77772e+06	92980	408042	92980	1.68713e+06	49549	0.207763	49549	1.06005e-05	68980	794480	52445	0.00032837	70360	150164	70360	1.59044e+06	56460	5.89039e-05	56460	0.000128135	89220	3.99423e+06	59777	0.0331218	70620	736141	55690	8.46513e-07	67136	0.0135701	63303	3.57168	63303	1.42136	102940	1.22667e+07	53054	4.84393	94240
	46351	215739	89860	274773	89860	256021	89860	1.19355e+06	60056	4.8167e+06	93000	410751	93000	1.69471e+06	49569	0.21163	49569	1.09526e-05	69000	798594	52465	0.000335657	70380	150711	70380	1.59891e+06	56490	6.0515e-05	56490	0.000131382	89250	4.01175e+06	59807	0.0339007	70650	740802	55710	8.67486e-07	67156	0.0137179	63323	3.59523	63323	1.43203	102960	1.22945e+07	53074	4.88901	94260
	46371	217042	89880	275911	89880	257012	89880	1.19845e+06	60076	4.85598e+06	93020	413476	93020	1.70232e+06	49589	0.215564	49589	1.13157e-05	69020	802727	52485	0.000343097	70400	151259	70400	1.60743e+06	56520	6.21677e-05	56520	0.000134706	89280	4.02933e+06	59837	0.0346969	70680	745488	55730	8.88953e-07	67176	0.0138673	63343	3.61891	63343	1.44277	102980	1.23224e+07	53094	4.93447	94280
	46391	218353	89900	277054	89900	258006	89900	1.20336e+06	60096	4.89555e+06	93040	416218	93040	1.70996e+06	49609	0.219566	49609	1.169e-05	69040	806879	52505	0.000350693	70420	151809	70420	1.61598e+06	56550	6.38631e-05	56550	0.00013811	89310	4.04698e+06	59867	0.0355107	70710	750200	55750	9.10926e-07	67196	0.0140183	63363	3.64274	63363	1.45359	103000	1.23504e+07	53114	4.98031	94300
	46411	219669	89920	278200	89920	259003	89920	1.2083e+06	60116	4.93541e+06	93060	418977	93060	1.71764e+06	49629	0.223637	49629	1.2076e-05	69060	811050	52525	0.000358447	70440	152360	70440	1.62458e+06	56580	6.56023e-05	56580	0.000141595	89340	4.0647e+06	59897	0.0363424	70740	754939	55770	9.33414e-07	67216	0.0141707	63383	3.66672	63383	1.46449	103020	1.23784e+07	53134	5.02655	94320
	46431	220993	89940	279351	89940	260004	89940	1.21325e+06	60136	4.97557e+06	93080	421753	93080	1.72534e+06	49649	0.227778	49649	1.24739e-05	69080	815240	52545	0.000366363	70460	152913	70460	1.63321e+06	56610	6.73863e-05	56610	0.000145163	89370	4.08248e+06	59927	0.0371925	70770	759703	55790	9.56431e-07	67236	0.0143248	63403	3.69084	63403	1.47546	103040	1.24064e+07	53154	5.07319	94340
	46451	222324	89960	280506	89960	261009	89960	1.21822e+06	60156	5.01603e+06	93100	424546	93100	1.73307e+06	49669	0.23199	49669	1.2884e-05	69100	819449	52565	0.000374445	70480	153468	70480	1.64189e+06	56640	6.92162e-05	56640	0.000148816	89400	4.10033e+06	59957	0.0380612	70800	764494	55810	9.79987e-07	67256	0.0144804	63423	3.7151	63423	1.4865	103060	1.24345e+07	53174	5.12023	94360
	46471	223662	89980	281665	89980	262017	89980	1.22321e+06	60176	5.05678e+06	93120	427356	93120	1.74084e+06	49689	0.236276	49689	1.33068e-05	69120	823677	52585	0.000382694	70500	154025	70500	1.65061e+06	56670	7.10931e-05	56670	0.000152556	89430	4.11825e+06	59987	0.0389491	70830	769312	55830	1.00409e-06	67276	0.0146376	63443	3.7395	63443	1.49762	103080	1.24627e+07	53194	5.16766	94380
	46491	225006	90000	282829	90000	263028	90000	1.22821e+06	60196	5.09785e+06	93140	430184	93140	1.74864e+06	49709	0.240635	49709	1.37426e-05	69140	827925	52605	0.000391115	70520	154584	70520	1.65937e+06	56700	7.30181e-05	56700	0.000156384	89460	4.13624e+06	60017	0.0398564	70860	774156	55850	1.02877e-06	67296	0.0147964	63463	3.76406	63463	1.50882	103100	1.24909e+07	53214	5.21551	94400
	46511	226358	90020	283997	90020	264043	90020	1.23324e+06	60216	5.13921e+06	93160	433028	93160	1.75646e+06	49729	0.245068	49729	1.41918e-05	69160	832192	52625	0.00039971	70540	155144	70540	1.66817e+06	56730	7.49925e-05	56730	0.000160303	89490	4.1543e+06	60047	0.0407836	70890	779026	55870	1.05401e-06	67316	0.0149568	63483	3.78876	63483	1.5201	103120	1.25192e+07	53234	5.26376	94420
	46531	227717	90040	285169	90040	265061	90040	1.23828e+06	60236	5.18089e+06	93180	435890	93180	1.76433e+06	49749	0.249578	49749	1.46547e-05	69180	836478	52645	0.000408484	70560	155706	70560	1.67702e+06	56760	7.70173e-05	56760	0.000164315	89520	4.17242e+06	60077	0.041731	70920	783924	55890	1.07985e-06	67336	0.0151189	63503	3.81361	63503	1.53145	103140	1.25475e+07	53254	5.31242	94440
	46551	229082	90060	286345	90060	266083	90060	1.24334e+06	60256	5.22287e+06	93200	438770	93200	1.77222e+06	49769	0.254165	49769	1.51317e-05	69200	840784	52665	0.00041744	70580	156269	70580	1.6859e+06	56790	7.90939e-05	56790	0.000168422	89550	4.19061e+06	60107	0.0426992	70950	788848	55910	1.10629e-06	67356	0.0152826	63523	3.8386	63523	1.54288	103160	1.25759e+07	53274	5.3615	94460
	46571	230455	90080	287526	90080	267108	90080	1.24842e+06	60276	5.26516e+06	93220	441667	93220	1.78014e+06	49789	0.258831	49789	1.56233e-05	69220	845110	52685	0.00042658	70600	156835	70600	1.69483e+06	56820	8.12234e-05	56820	0.000172626	89580	4.20887e+06	60137	0.0436885	70980	793800	55930	1.13335e-06	67376	0.0154479	63543	3.86375	63543	1.55439	103180	1.26043e+07	53294	5.41099	94480
	46591	231835	90100	288711	90100	268137	90100	1.25352e+06	60296	5.30777e+06	93240	444582	93240	1.7881e+06	49809	0.263576	49809	1.61299e-05	69240	849455	52705	0.00043591	70620	157402	70620	1.7038e+06	56850	8.34072e-05	56850	0.000176928	89610	4.2272e+06	60167	0.0446993	71010	798778	55950	1.16103e-06	67396	0.015615	63563	3.88905	63563	1.56598	103200	1.26328e+07	53314	5.46091	94500
	46611	233222	90120	289901	90120	269169	90120	1.25864e+06	60316	5.35069e+06	93260	447515	93260	1.79609e+06	49829	0.268402	49829	1.66518e-05	69260	853820	52725	0.000445432	70640	157971	70640	1.71282e+06	56880	8.56465e-05	56880	0.000181332	89640	4.2456e+06	60197	0.0457322	71040	803784	55970	1.18936e-06	67416	0.0157838	63583	3.9145	63583	1.57764	103220	1.26613e+07	53334	5.51125	94520
	46631	234617	90140	291094	90140	270205	90140	1.26377e+06	60336	5.39392e+06	93280	450466	93280	1.80411e+06	49849	0.273311	49849	1.71896e-05	69280	858205	52745	0.00045515	70660	158541	70660	1.72187e+06	56910	8.79427e-05	56910	0.00018584	89670	4.26407e+06	60227	0.0467874	71070	808818	55990	1.21834e-06	67436	0.0159542	63603	3.9401	63603	1.58939	103240	1.26899e+07	53354	5.56202	94540
	46651	236018	90160	292293	90160	271244	90160	1.26893e+06	60356	5.43748e+06	93300	453435	93300	1.81216e+06	49869	0.278303	49869	1.77436e-05	69300	862609	52765	0.000465069	70680	159114	70680	1.73097e+06	56940	9.02971e-05	56940	0.000190453	89700	4.28261e+06	60257	0.0478656	71100	813879	56010	1.24799e-06	67456	0.0161264	63623	3.96585	63623	1.60122	103260	1.27186e+07	53374	5.61322	94560
	46671	237427	90180	293495	90180	272287	90180	1.2741e+06	60376	5.48136e+06	93320	456422	93320	1.82024e+06	49889	0.28338	49889	1.83143e-05	69320	867034	52785	0.000475191	70700	159688	70700	1.74011e+06	56970	9.27111e-05	56970	0.000195175	89730	4.30122e+06	60287	0.0489671	71130	818967	56030	1.27834e-06	67476	0.0163004	63643	3.99175	63643	1.61313	103280	1.27473e+07	53394	5.66485	94580
	46691	238843	90200	294702	90200	273333	90200	1.27929e+06	60396	5.52556e+06	93340	459427	93340	1.82836e+06	49909	0.288543	49909	1.89023e-05	69340	871479	52805	0.000485522	70720	160264	70720	1.7493e+06	57000	9.51862e-05	57000	0.000200007	89760	4.3199e+06	60317	0.0500925	71160	824084	56050	1.30938e-06	67496	0.0164761	63663	4.01781	63663	1.62512	103300	1.27761e+07	53414	5.71692	94600
	46711	240266	90220	295914	90220	274383	90220	1.2845e+06	60416	5.57009e+06	93360	462450	93360	1.83651e+06	49929	0.293794	49929	1.95079e-05	69360	875944	52825	0.000496064	70740	160842	70740	1.75853e+06	57030	9.77238e-05	57030	0.000204951	89790	4.33865e+06	60347	0.0512422	71190	829229	56070	1.34114e-06	67516	0.0166536	63683	4.04403	63683	1.63719	103320	1.28049e+07	53434	5.76943	94620
	46731	241697	90240	297130	90240	275437	90240	1.28973e+06	60436	5.61494e+06	93380	465492	93380	1.8447e+06	49949	0.299134	49949	2.01317e-05	69380	880429	52845	0.000506822	70760	161421	70760	1.7678e+06	57060	0.000100325	57060	0.000210012	89820	4.35747e+06	60377	0.0524166	71220	834401	56090	1.37363e-06	67536	0.0168329	63703	4.0704	63703	1.64935	103340	1.28338e+07	53454	5.82239	94640
	46751	243135	90260	298350	90260	276494	90260	1.29498e+06	60456	5.66013e+06	93400	468552	93400	1.85291e+06	49969	0.304564	49969	2.07742e-05	69400	884934	52865	0.0005178	70780	162003	70780	1.77711e+06	57090	0.000102992	57090	0.00021519	89850	4.37636e+06	60407	0.0536164	71250	839602	56110	1.40687e-06	67556	0.017014	63723	4.09693	63723	1.66158	103360	1.28627e+07	53474	5.87579	94660
	46771	244581	90280	299575	90280	277554	90280	1.30025e+06	60476	5.70565e+06	93420	471631	93420	1.86116e+06	49989	0.310085	49989	2.14359e-05	69420	889460	52885	0.000529002	70800	162586	70800	1.78647e+06	57120	0.000105727	57120	0.000220489	89880	4.39533e+06	60437	0.0548421	71280	844831	56130	1.44087e-06	67576	0.017197	63743	4.12362	63743	1.67391	103380	1.28917e+07	53494	5.92965	94680
	46791	246034	90300	300804	90300	278619	90300	1.30554e+06	60496	5.7515e+06	93440	474729	93440	1.86944e+06	50009	0.3157	50009	2.21173e-05	69440	894006	52905	0.000540433	70820	163171	70820	1.79588e+06	57150	0.000108529	57150	0.000225911	89910	4.41436e+06	60467	0.056094	71310	850089	56150	1.47566e-06	67596	0.0173818	63763	4.15046	63763	1.68631	103400	1.29207e+07	53514	5.98396	94700
	46811	247494	90320	302038	90320	279686	90320	1.31084e+06	60516	5.79769e+06	93460	477846	93460	1.87776e+06	50029	0.32141	50029	2.2819e-05	69460	898573	52925	0.000552098	70840	163757	70840	1.80533e+06	57180	0.000111403	57180	0.000231458	89940	4.43346e+06	60497	0.0573728	71340	855375	56170	1.51124e-06	67616	0.0175684	63783	4.17746	63783	1.6988	103420	1.29498e+07	53534	6.03873	94720
	46831	248962	90340	303276	90340	280758	90340	1.31617e+06	60536	5.84421e+06	93480	480981	93480	1.88611e+06	50049	0.327216	50049	2.35416e-05	69480	903161	52945	0.000563999	70860	164346	70860	1.81482e+06	57210	0.000114348	57210	0.000237135	89970	4.45264e+06	60527	0.0586791	71370	860690	56190	1.54764e-06	67636	0.017757	63803	4.20463	63803	1.71138	103440	1.2979e+07	53554	6.09396	94740
	46851	250438	90360	304519	90360	281833	90360	1.32151e+06	60556	5.89108e+06	93500	484136	93500	1.89449e+06	50069	0.333119	50069	2.42856e-05	69500	907769	52965	0.000576143	70880	164936	70880	1.82436e+06	57240	0.000117366	57240	0.000242943	90000	4.47189e+06	60557	0.0600133	71400	866034	56210	1.58488e-06	67656	0.0179474	63823	4.23195	63823	1.72404	103460	1.30082e+07	53574	6.14966	94760
	46871	251921	90380	305766	90380	282912	90380	1.32688e+06	60576	5.93829e+06	93520	487310	93520	1.90291e+06	50089	0.339122	50089	2.50517e-05	69520	912398	52985	0.000588534	70900	165529	70900	1.83394e+06	57270	0.00012046	57270	0.000248885	90030	4.49121e+06	60587	0.061376	71430	871407	56230	1.62296e-06	67676	0.0181398	63843	4.25944	63843	1.73679	103480	1.30375e+07	53594	6.20582	94780
	46891	253412	90400	307018	90400	283994	90400	1.33226e+06	60596	5.98585e+06	93540	490503	93540	1.91136e+06	50109	0.345225	50109	2.58403e-05	69540	917048	53005	0.000601175	70920	166123	70920	1.84357e+06	57300	0.000123631	57300	0.000254964	90060	4.5106e+06	60617	0.0627678	71460	876810	56250	1.66192e-06	67696	0.0183341	63863	4.28709	63863	1.74962	103500	1.30668e+07	53614	6.26246	94800
	46911	254910	90420	308275	90420	285080	90420	1.33766e+06	60616	6.03376e+06	93560	493715	93560	1.91984e+06	50129	0.35143	50129	2.66523e-05	69560	921718	53025	0.000614073	70940	166718	70940	1.85324e+06	57330	0.000126882	57330	0.000261184	90090	4.53007e+06	60647	0.0641892	71490	882241	56270	1.70176e-06	67716	0.0185304	63883	4.3149	63883	1.76254	103520	1.30962e+07	53634	6.31957	94820
	46931	256416	90440	309536	90440	286170	90440	1.34308e+06	60636	6.08201e+06	93580	496947	93580	1.92836e+06	50149	0.357739	50149	2.74881e-05	69580	926410	53045	0.000627232	70960	167316	70960	1.86296e+06	57360	0.000130212	57360	0.000267546	90120	4.54961e+06	60677	0.0656409	71520	887702	56290	1.74252e-06	67736	0.0187286	63903	4.34288	63903	1.77555	103540	1.31256e+07	53654	6.37717	94840
	46951	257930	90460	310801	90460	287263	90460	1.34853e+06	60656	6.13062e+06	93600	500199	93600	1.93691e+06	50169	0.364154	50169	2.83485e-05	69600	931123	53065	0.000640657	70980	167915	70980	1.87272e+06	57390	0.000133626	57390	0.000274055	90150	4.56922e+06	60707	0.0671235	71550	893192	56310	1.7842e-06	67756	0.0189288	63923	4.37102	63923	1.78865	103560	1.31551e+07	53674	6.43525	94860
	46971	259451	90480	312071	90480	288360	90480	1.35399e+06	60676	6.17958e+06	93620	503470	93620	1.9455e+06	50189	0.370676	50189	2.92342e-05	69620	935857	53085	0.000654353	71000	168517	71000	1.88253e+06	57420	0.000137124	57420	0.000280714	90180	4.58891e+06	60737	0.0686376	71580	898713	56330	1.82682e-06	67776	0.0191311	63943	4.39933	63943	1.80183	103580	1.31846e+07	53694	6.49381	94880
	46991	260981	90500	313346	90500	289461	90500	1.35947e+06	60696	6.2289e+06	93640	506761	93640	1.95412e+06	50209	0.377306	50209	3.01457e-05	69640	940612	53105	0.000668326	71020	169120	71020	1.89239e+06	57450	0.000140709	57450	0.000287525	90210	4.60867e+06	60767	0.0701838	71610	904263	56350	1.87042e-06	67796	0.0193354	63963	4.42781	63963	1.81511	103600	1.32143e+07	53714	6.55287	94900
	47011	262518	90520	314626	90520	290566	90520	1.36497e+06	60716	6.27858e+06	93660	510072	93660	1.96278e+06	50229	0.384047	50229	3.10839e-05	69660	945389	53125	0.00068258	71040	169725	71040	1.90229e+06	57480	0.000144383	57480	0.000294492	90240	4.6285e+06	60797	0.0717627	71640	909842	56370	1.91501e-06	67816	0.0195417	63983	4.45645	63983	1.82848	103620	1.32439e+07	53734	6.61242	94920
	47031	264062	90540	315910	90540	291674	90540	1.37049e+06	60736	6.32862e+06	93680	513403	93680	1.97147e+06	50249	0.3909	50249	3.20495e-05	69680	950187	53145	0.00069712	71060	170332	71060	1.91224e+06	57510	0.000148147	57510	0.000301619	90270	4.64841e+06	60827	0.073375	71670	915452	56390	1.9606e-06	67836	0.0197501	64003	4.48527	64003	1.84193	103640	1.32736e+07	53754	6.67247	94940
	47051	265615	90560	317199	90560	292786	90560	1.37603e+06	60756	6.37903e+06	93700	516754	93700	1.98019e+06	50269	0.397867	50269	3.30431e-05	69700	955007	53165	0.000711953	71080	170941	71080	1.92223e+06	57540	0.000152004	57540	0.000308908	90300	4.66839e+06	60857	0.0750213	71700	921093	56410	2.00723e-06	67856	0.0199606	64023	4.51425	64023	1.85548	103660	1.33034e+07	53774	6.73302	94960
	47071	267176	90580	318492	90580	293902	90580	1.38159e+06	60776	6.4298e+06	93720	520126	93720	1.98895e+06	50289	0.404949	50289	3.40656e-05	69720	959848	53185	0.000727083	71100	171551	71100	1.93228e+06	57570	0.000155956	57570	0.000316364	90330	4.68845e+06	60887	0.0767024	71730	926763	56430	2.05491e-06	67876	0.0201732	64043	4.54341	64043	1.86912	103680	1.33332e+07	53794	6.79408	94980
	47091	268744	90600	319791	90600	295021	90600	1.38717e+06	60796	6.48094e+06	93740	523517	93740	1.99775e+06	50309	0.412148	50309	3.51178e-05	69740	964711	53205	0.000742517	71120	172164	71120	1.94236e+06	57600	0.000160005	57600	0.000323989	90360	4.70858e+06	60917	0.0784189	71760	932465	56450	2.10367e-06	67896	0.0203879	64063	4.57273	64063	1.88285	103700	1.33631e+07	53814	6.85565	95000
	47111	270321	90620	321093	90620	296145	90620	1.39277e+06	60816	6.53246e+06	93760	526930	93760	2.00658e+06	50329	0.419467	50329	3.62004e-05	69760	969595	53225	0.00075826	71140	172778	71140	1.9525e+06	57630	0.000164154	57630	0.000331788	90390	4.72878e+06	60947	0.0801714	71790	938196	56470	2.15353e-06	67916	0.0206048	64083	4.60223	64083	1.89667	103720	1.33931e+07	53834	6.91773	95020
	47131	271906	90640	322401	90640	297272	90640	1.39839e+06	60836	6.58434e+06	93780	530363	93780	2.01544e+06	50349	0.426907	50349	3.73142e-05	69780	974502	53245	0.000774318	71160	173394	71160	1.96268e+06	57660	0.000168404	57660	0.000339765	90420	4.74906e+06	60977	0.0819608	71820	943959	56490	2.20451e-06	67936	0.0208238	64103	4.6319	64103	1.91059	103740	1.34231e+07	53854	6.98033	95040
	47151	273498	90660	323713	90660	298403	90660	1.40403e+06	60856	6.63661e+06	93800	533816	93800	2.02434e+06	50369	0.434469	50369	3.84602e-05	69800	979430	53265	0.000790696	71180	174012	71180	1.97291e+06	57690	0.000172758	57690	0.000347922	90450	4.76942e+06	61007	0.0837878	71850	949753	56510	2.25664e-06	67956	0.0210451	64123	4.66175	64123	1.9246	103760	1.34532e+07	53874	7.04345	95060
	47171	275099	90680	325031	90680	299537	90680	1.40969e+06	60876	6.68925e+06	93820	537291	93820	2.03328e+06	50389	0.442156	50389	3.96392e-05	69820	984381	53285	0.000807401	71200	174632	71200	1.98319e+06	57720	0.000177219	57720	0.000356264	90480	4.78985e+06	61037	0.085653	71880	955577	56530	2.30994e-06	67976	0.0212685	64143	4.69177	64143	1.93871	103780	1.34833e+07	53894	7.1071	95080
	47191	276708	90700	326353	90700	300676	90700	1.41538e+06	60896	6.74227e+06	93840	540786	93840	2.04225e+06	50409	0.44997	50409	4.0852e-05	69840	989353	53305	0.00082444	71220	175254	71220	1.99352e+06	57750	0.000181789	57750	0.000364794	90510	4.81036e+06	61067	0.0875572	71910	961433	56550	2.36444e-06	67996	0.0214942	64163	4.72197	64163	1.95291	103800	1.35135e+07	53914	7.17128	95100
	47211	278325	90720	327679	90720	301818	90720	1.42108e+06	60916	6.79568e+06	93860	544302	93860	2.05125e+06	50429	0.457912	50429	4.20996e-05	69860	994348	53325	0.000841817	71240	175878	71240	2.00389e+06	57780	0.00018647	57780	0.000373518	90540	4.83094e+06	61097	0.0895012	71940	967320	56570	2.42016e-06	68016	0.0217221	64183	4.75234	64183	1.96721	103820	1.35437e+07	53934	7.23599	95120
	47231	279950	90740	329011	90740	302964	90740	1.4268e+06	60936	6.84947e+06	93880	547840	93880	2.0603e+06	50449	0.465984	50449	4.33829e-05	69880	999365	53345	0.00085954	71260	176503	71260	2.01432e+06	57810	0.000191265	57810	0.000382438	90570	4.8516e+06	61127	0.0914858	71970	973239	56590	2.47713e-06	68036	0.0219523	64203	4.78289	64203	1.9816	103840	1.3574e+07	53954	7.30124	95140
	47251	281583	90760	330347	90760	304114	90760	1.43254e+06	60956	6.90366e+06	93900	551399	93900	2.06938e+06	50469	0.474189	50469	4.47028e-05	69900	1.0044e+06	53365	0.000877615	71280	177131	71280	2.02479e+06	57840	0.000196177	57840	0.00039156	90600	4.87234e+06	61157	0.0935117	72000	979190	56610	2.53537e-06	68056	0.0221848	64223	4.81363	64223	1.99609	103860	1.36043e+07	53974	7.36703	95160
	47271	283225	90780	331688	90780	305268	90780	1.43831e+06	60976	6.95823e+06	93920	554979	93920	2.07849e+06	50489	0.482529	50489	4.60604e-05	69920	1.00947e+06	53385	0.000896048	71300	177761	71300	2.03531e+06	57870	0.000201208	57870	0.000400886	90630	4.89315e+06	61187	0.0955798	72030	985172	56630	2.59491e-06	68076	0.0224196	64243	4.84454	64243	2.01068	103880	1.36348e+07	53994	7.43337	95180
	47291	284874	90800	333034	90800	306426	90800	1.44409e+06	60996	7.0132e+06	93940	558581	93940	2.08764e+06	50509	0.491005	50509	4.74566e-05	69940	1.01455e+06	53405	0.000914846	71320	178392	71320	2.04588e+06	57900	0.000206361	57900	0.000410423	90660	4.91405e+06	61217	0.0976909	72060	991186	56650	2.65579e-06	68096	0.0226568	64263	4.87563	64263	2.02536	103900	1.36652e+07	54014	7.50025	95200
	47311	286533	90820	334385	90820	307588	90820	1.44989e+06	61016	7.06856e+06	93960	562204	93960	2.09683e+06	50529	0.499619	50529	4.88925e-05	69960	1.01966e+06	53425	0.000934017	71340	179025	71340	2.0565e+06	57930	0.000211639	57930	0.000420173	90690	4.93501e+06	61247	0.0998457	72090	997232	56670	2.71802e-06	68116	0.0228963	64283	4.90691	64283	2.04015	103920	1.36957e+07	54034	7.5677	95220
	47331	288199	90840	335741	90840	308753	90840	1.45572e+06	61036	7.12433e+06	93980	565850	93980	2.10606e+06	50549	0.508374	50549	5.03691e-05	69980	1.02479e+06	53445	0.000953566	71360	179660	71360	2.06716e+06	57960	0.000217044	57960	0.000430142	90720	4.95606e+06	61277	0.102045	72120	1.00331e+06	56690	2.78164e-06	68136	0.0231382	64303	4.93836	64303	2.05503	103940	1.37263e+07	54054	7.6357	95240
	47351	289874	90860	337102	90860	309923	90860	1.46157e+06	61056	7.18049e+06	94000	569517	94000	2.11532e+06	50569	0.517272	50569	5.18875e-05	70000	1.02994e+06	53465	0.000973502	71380	180298	71380	2.07788e+06	57990	0.00022258	57990	0.000440335	90750	4.97718e+06	61307	0.10429	72150	1.00942e+06	56710	2.84667e-06	68156	0.0233824	64323	4.97001	64323	2.07001	103960	1.3757e+07	54074	7.70426	95260
	47371	291557	90880	338467	90880	311096	90880	1.46743e+06	61076	7.23706e+06	94020	573206	94020	2.12461e+06	50589	0.526315	50589	5.34487e-05	70020	1.03512e+06	53485	0.00099383	71400	180937	71400	2.08865e+06	58020	0.000228249	58020	0.000450755	90780	4.99839e+06	61337	0.106582	72180	1.01556e+06	56730	2.91315e-06	68176	0.0236291	64343	5.00183	64343	2.0851	103980	1.37877e+07	54094	7.77339	95280
	47391	293249	90900	339838	90900	312273	90900	1.47332e+06	61096	7.29404e+06	94040	576917	94040	2.13395e+06	50609	0.535504	50609	5.5054e-05	70040	1.04031e+06	53505	0.00101456	71420	181578	71420	2.09947e+06	58050	0.000234055	58050	0.000461408	90810	5.01967e+06	61367	0.108921	72210	1.02174e+06	56750	2.9811e-06	68196	0.0238783	64363	5.03384	64363	2.10028	104000	1.38184e+07	54114	7.84309	95300
	47411	294949	90920	341213	90920	313455	90920	1.47923e+06	61116	7.35142e+06	94060	580651	94060	2.14332e+06	50629	0.544843	50629	5.67045e-05	70060	1.04554e+06	53525	0.0010357	71440	182221	71440	2.11033e+06	58080	0.000240001	58080	0.000472298	90840	5.04103e+06	61397	0.111308	72240	1.02795e+06	56770	3.05056e-06	68216	0.0241299	64383	5.06604	64383	2.11557	104020	1.38493e+07	54134	7.91337	95320
	47431	296658	90940	342593	90940	314640	90940	1.48516e+06	61136	7.40922e+06	94080	584406	94080	2.15273e+06	50649	0.554334	50649	5.84013e-05	70080	1.05078e+06	53545	0.00105725	71460	182866	71460	2.12125e+06	58110	0.000246089	58110	0.000483431	90870	5.06246e+06	61427	0.113744	72270	1.03419e+06	56790	3.12156e-06	68236	0.024384	64403	5.09843	64403	2.13096	104040	1.38801e+07	54154	7.98422	95340
	47451	298376	90960	343979	90960	315829	90960	1.49111e+06	61156	7.46743e+06	94100	588185	94100	2.16217e+06	50669	0.563978	50669	6.01457e-05	70100	1.05605e+06	53565	0.00107922	71480	183512	71480	2.13222e+06	58140	0.000252324	58140	0.000494812	90900	5.08398e+06	61457	0.11623	72300	1.04047e+06	56810	3.19413e-06	68256	0.0246407	64423	5.131	64423	2.14645	104060	1.39111e+07	54174	8.05567	95360
	47471	300102	90980	345369	90980	317022	90980	1.49709e+06	61176	7.52606e+06	94120	591986	94120	2.17166e+06	50689	0.573779	50689	6.1939e-05	70120	1.06134e+06	53585	0.00110163	71500	184161	71500	2.14324e+06	58170	0.000258707	58170	0.000506445	90930	5.10558e+06	61487	0.118768	72330	1.04677e+06	56830	3.26831e-06	68276	0.0248998	64443	5.16377	64443	2.16204	104080	1.39421e+07	54194	8.1277	95380
	47491	301836	91000	346765	91000	318219	91000	1.50308e+06	61196	7.58511e+06	94140	595809	94140	2.18118e+06	50709	0.583738	50709	6.37823e-05	70140	1.06665e+06	53605	0.00112447	71520	184812	71520	2.15431e+06	58200	0.000265244	58200	0.000518337	90960	5.12725e+06	61517	0.121357	72360	1.05312e+06	56850	3.34412e-06	68296	0.0251616	64463	5.19672	64463	2.17774	104100	1.39731e+07	54214	8.20032	95400
	47511	303579	91020	348165	91020	319420	91020	1.5091e+06	61216	7.64459e+06	94160	599656	94160	2.19074e+06	50729	0.593858	50729	6.56771e-05	70160	1.07199e+06	53625	0.00114776	71540	185465	71540	2.16543e+06	58230	0.000271936	58230	0.000530492	90990	5.14901e+06	61547	0.123999	72390	1.05949e+06	56870	3.4216e-06	68316	0.0254259	64483	5.22987	64483	2.19355	104120	1.40042e+07	54234	8.27354	95420
	47531	305331	91040	349570	91040	320625	91040	1.51513e+06	61236	7.70449e+06	94180	603526	94180	2.20033e+06	50749	0.604141	50749	6.76246e-05	70180	1.07735e+06	53645	0.00117151	71560	186120	71560	2.1766e+06	58260	0.000278789	58260	0.000542916	91020	5.17084e+06	61577	0.126696	72420	1.0659e+06	56890	3.50079e-06	68336	0.0256928	64503	5.26321	64503	2.20946	104140	1.40354e+07	54254	8.34736	95440
	47551	307092	91060	350981	91060	321834	91060	1.52119e+06	61256	7.76481e+06	94200	607418	94200	2.20997e+06	50769	0.61459	50769	6.96262e-05	70200	1.08274e+06	53665	0.00119572	71580	186776	71580	2.18782e+06	58290	0.000285804	58290	0.000555614	91050	5.19276e+06	61607	0.129448	72450	1.07234e+06	56910	3.58172e-06	68356	0.0259624	64523	5.29674	64523	2.22547	104160	1.40666e+07	54274	8.42179	95460
	47571	308862	91080	352396	91080	323048	91080	1.52727e+06	61276	7.82557e+06	94220	611334	94220	2.21964e+06	50789	0.625206	50789	7.16834e-05	70220	1.08815e+06	53685	0.0012204	71600	187435	71600	2.1991e+06	58320	0.000292986	58320	0.000568593	91080	5.21475e+06	61637	0.132255	72480	1.07882e+06	56930	3.66443e-06	68376	0.0262346	64543	5.33047	64543	2.24159	104180	1.40979e+07	54294	8.49683	95480
	47591	310640	91100	353817	91100	324265	91100	1.53337e+06	61296	7.88676e+06	94240	615273	94240	2.22935e+06	50809	0.635994	50809	7.37975e-05	70240	1.09358e+06	53705	0.00124556	71620	188096	71620	2.21043e+06	58350	0.000300339	58350	0.000581858	91110	5.23683e+06	61667	0.13512	72510	1.08533e+06	56950	3.74895e-06	68396	0.0265095	64563	5.3644	64563	2.25782	104200	1.41293e+07	54314	8.57249	95500
	47611	312427	91120	355243	91120	325486	91120	1.5395e+06	61316	7.94839e+06	94260	619236	94260	2.2391e+06	50829	0.646954	50829	7.59701e-05	70260	1.09904e+06	53725	0.00127121	71640	188758	71640	2.22181e+06	58380	0.000307867	58380	0.000595414	91140	5.25899e+06	61697	0.138044	72540	1.09188e+06	56970	3.83533e-06	68416	0.0267871	64583	5.39852	64583	2.27416	104220	1.41607e+07	54334	8.64876	95520
	47631	314223	91140	356673	91140	326711	91140	1.54564e+06	61336	8.01046e+06	94280	623223	94280	2.24889e+06	50849	0.658091	50849	7.82026e-05	70280	1.10452e+06	53745	0.00129736	71660	189423	71660	2.23324e+06	58410	0.000315572	58410	0.000609269	91170	5.28123e+06	61727	0.141026	72570	1.09846e+06	56990	3.9236e-06	68436	0.0270675	64603	5.43284	64603	2.29061	104240	1.41921e+07	54354	8.72566	95540
	47651	316028	91160	358109	91160	327941	91160	1.55181e+06	61356	8.07297e+06	94300	627233	94300	2.25871e+06	50869	0.669405	50869	8.04965e-05	70300	1.11002e+06	53765	0.00132402	71680	190090	71680	2.24472e+06	58440	0.00032346	58440	0.000623428	91200	5.30355e+06	61757	0.14407	72600	1.10507e+06	57010	4.0138e-06	68456	0.0273506	64623	5.46735	64623	2.30716	104260	1.42237e+07	54374	8.80319	95560
	47671	317842	91180	359550	91180	329174	91180	1.558e+06	61376	8.13593e+06	94320	631267	94320	2.26858e+06	50889	0.680901	50889	8.28536e-05	70320	1.11555e+06	53785	0.00135119	71700	190758	71700	2.25626e+06	58470	0.000331535	58470	0.000637897	91230	5.32595e+06	61787	0.147175	72630	1.11172e+06	57030	4.10597e-06	68476	0.0276364	64643	5.50207	64643	2.32383	104280	1.42553e+07	54394	8.88136	95580
	47691	319665	91200	360997	91200	330412	91200	1.56421e+06	61396	8.19934e+06	94340	635325	94340	2.27848e+06	50909	0.69258	50909	8.52753e-05	70340	1.12111e+06	53805	0.00137889	71720	191429	71720	2.26785e+06	58500	0.0003398	58500	0.000652684	91260	5.34844e+06	61817	0.150342	72660	1.1184e+06	57050	4.20016e-06	68496	0.0279251	64663	5.53699	64663	2.34061	104300	1.42869e+07	54414	8.96016	95600
	47711	321497	91220	362448	91220	331653	91220	1.57044e+06	61416	8.26319e+06	94360	639407	94360	2.28843e+06	50929	0.704446	50929	8.77634e-05	70360	1.12668e+06	53825	0.00140713	71740	192102	71740	2.2795e+06	58530	0.00034826	58530	0.000667793	91290	5.371e+06	61847	0.153574	72690	1.12512e+06	57070	4.2964e-06	68516	0.0282167	64683	5.57211	64683	2.3575	104320	1.43186e+07	54434	9.03961	95620
	47731	323338	91240	363905	91240	332899	91240	1.5767e+06	61436	8.3275e+06	94380	643514	94380	2.29841e+06	50949	0.716501	50949	9.03195e-05	70380	1.13229e+06	53845	0.00143591	71760	192777	71760	2.29119e+06	58560	0.000356918	58560	0.000683233	91320	5.39365e+06	61877	0.156871	72720	1.13188e+06	57090	4.39473e-06	68536	0.028511	64703	5.60743	64703	2.3745	104340	1.43504e+07	54454	9.11971	95640
	47751	325189	91260	365366	91260	334149	91260	1.58297e+06	61456	8.39227e+06	94400	647645	94400	2.30843e+06	50969	0.728747	50969	9.29453e-05	70400	1.13791e+06	53865	0.00146524	71780	193453	71780	2.30294e+06	58590	0.000365781	58590	0.000699009	91350	5.41639e+06	61907	0.160235	72750	1.13867e+06	57110	4.4952e-06	68556	0.0288083	64723	5.64296	64723	2.39161	104360	1.43822e+07	54474	9.20046	95660
	47771	327048	91280	366834	91280	335403	91280	1.58927e+06	61476	8.4575e+06	94420	651800	94420	2.31849e+06	50989	0.741189	50989	9.56428e-05	70420	1.14356e+06	53885	0.00149514	71800	194132	71800	2.31475e+06	58620	0.000374851	58620	0.000715129	91380	5.4392e+06	61937	0.163666	72780	1.14549e+06	57130	4.59786e-06	68576	0.0291085	64743	5.67869	64743	2.40884	104380	1.44141e+07	54494	9.28187	95680
	47791	328917	91300	368306	91300	336662	91300	1.5956e+06	61496	8.52318e+06	94440	655980	94440	2.32859e+06	51009	0.753827	51009	9.84136e-05	70440	1.14924e+06	53905	0.00152562	71820	194813	71820	2.32661e+06	58650	0.000384134	58650	0.000731599	91410	5.4621e+06	61967	0.167167	72810	1.15235e+06	57150	4.70274e-06	68596	0.0294116	64763	5.71462	64763	2.42618	104400	1.44461e+07	54514	9.36394	95700
	47811	330794	91320	369783	91320	337924	91320	1.60194e+06	61516	8.58934e+06	94460	660185	94460	2.33873e+06	51029	0.766667	51029	0.00010126	70460	1.15494e+06	53925	0.00155668	71840	195496	71840	2.33852e+06	58680	0.000393634	58680	0.000748428	91440	5.48508e+06	61997	0.170737	72840	1.15925e+06	57170	4.8099e-06	68616	0.0297177	64783	5.75077	64783	2.44363	104420	1.44781e+07	54534	9.44668	95720
	47831	332681	91340	371266	91340	339191	91340	1.60831e+06	61536	8.65596e+06	94480	664415	94480	2.34891e+06	51049	0.77971	51049	0.000104183	70480	1.16067e+06	53945	0.00158834	71860	196181	71860	2.35049e+06	58710	0.000403357	58710	0.000765621	91470	5.50815e+06	62027	0.17438	72870	1.16618e+06	57190	4.91937e-06	68636	0.0300268	64803	5.78712	64803	2.4612	104440	1.45101e+07	54554	9.53009	95740
	47851	334578	91360	372754	91360	340461	91360	1.6147e+06	61556	8.72306e+06	94500	668670	94500	2.35913e+06	51069	0.792959	51069	0.000107185	70500	1.16642e+06	53965	0.00162061	71880	196868	71880	2.36251e+06	58740	0.000413306	58740	0.000783187	91500	5.5313e+06	62057	0.178095	72900	1.17315e+06	57210	5.03122e-06	68656	0.0303389	64823	5.82369	64823	2.47889	104460	1.45423e+07	54574	9.61418	95760
	47871	336483	91380	374248	91380	341736	91380	1.62111e+06	61576	8.79063e+06	94520	672951	94520	2.36939e+06	51089	0.806417	51089	0.000110268	70520	1.1722e+06	53985	0.00165349	71900	197557	71900	2.37459e+06	58770	0.000423487	58770	0.000801134	91530	5.55453e+06	62087	0.181885	72930	1.18016e+06	57230	5.14549e-06	68676	0.0306541	64843	5.86046	64843	2.49669	104480	1.45745e+07	54594	9.69895	95780
	47891	338398	91400	375747	91400	343016	91400	1.62754e+06	61596	8.85867e+06	94540	677256	94540	2.37969e+06	51109	0.820088	51109	0.000113435	70540	1.178e+06	54005	0.001687	71920	198248	71920	2.38672e+06	58800	0.000433905	58800	0.000819468	91560	5.57785e+06	62117	0.18575	72960	1.1872e+06	57250	5.26222e-06	68696	0.0309723	64863	5.89744	64863	2.51461	104500	1.46067e+07	54614	9.78441	95800
	47911	340323	91420	377251	91420	344299	91420	1.634e+06	61616	8.9272e+06	94560	681587	94560	2.39003e+06	51129	0.833975	51129	0.000116687	70560	1.18383e+06	54025	0.00172115	71940	198941	71940	2.39891e+06	58830	0.000444566	58830	0.000838198	91590	5.60125e+06	62147	0.189693	72990	1.19428e+06	57270	5.38146e-06	68716	0.0312936	64883	5.93464	64883	2.53265	104520	1.4639e+07	54634	9.87057	95820
	47931	342257	91440	378760	91440	345587	91440	1.64048e+06	61636	8.99621e+06	94580	685944	94580	2.40041e+06	51149	0.84808	51149	0.000120026	70580	1.18968e+06	54045	0.00175596	71960	199636	71960	2.41116e+06	58860	0.000455474	58860	0.000857332	91620	5.62474e+06	62177	0.193714	73020	1.20139e+06	57290	5.50328e-06	68736	0.0316181	64903	5.97205	64903	2.55081	104540	1.46714e+07	54654	9.95742	95840
	47951	344200	91460	380275	91460	346879	91460	1.64698e+06	61656	9.06571e+06	94600	690327	94600	2.41083e+06	51169	0.862407	51169	0.000123454	70600	1.19556e+06	54065	0.00179143	71980	200334	71980	2.42346e+06	58890	0.000466635	58890	0.000876878	91650	5.64832e+06	62207	0.197815	73050	1.20854e+06	57310	5.62771e-06	68756	0.0319457	64923	6.00968	64923	2.56909	104560	1.47038e+07	54674	10.045	95860
	47971	346153	91480	381795	91480	348175	91480	1.65351e+06	61676	9.1357e+06	94620	694735	94620	2.4213e+06	51189	0.876959	51189	0.000126975	70620	1.20146e+06	54085	0.00182757	72000	201033	72000	2.43581e+06	58920	0.000478054	58920	0.000896844	91680	5.67198e+06	62237	0.201998	73080	1.21573e+06	57330	5.75482e-06	68776	0.0322765	64943	6.04752	64943	2.58749	104580	1.47363e+07	54694	10.1332	95880
	47991	348116	91500	383321	91500	349476	91500	1.66006e+06	61696	9.20618e+06	94640	699169	94640	2.4318e+06	51209	0.89174	51209	0.000130589	70640	1.20739e+06	54105	0.0018644	72020	201734	72020	2.44823e+06	58950	0.000489738	58950	0.000917239	91710	5.69572e+06	62267	0.206264	73110	1.22296e+06	57350	5.88466e-06	68796	0.0326106	64963	6.08558	64963	2.60601	104600	1.47689e+07	54714	10.2222	95900
	48011	350088	91520	384852	91520	350780	91520	1.66663e+06	61716	9.27716e+06	94660	703630	94660	2.44234e+06	51229	0.906752	51229	0.0001343	70660	1.21334e+06	54125	0.00190194	72040	202438	72040	2.4607e+06	58980	0.000501691	58980	0.000938072	91740	5.71955e+06	62297	0.210614	73140	1.23022e+06	57370	6.01729e-06	68816	0.0329479	64983	6.12385	64983	2.62465	104620	1.48015e+07	54734	10.3119	95920
	48031	352070	91540	386388	91540	352090	91540	1.67322e+06	61736	9.34863e+06	94680	708117	94680	2.45293e+06	51249	0.922	51249	0.00013811	70680	1.21933e+06	54145	0.00194018	72060	203144	72060	2.47322e+06	59010	0.00051392	59010	0.000959351	91770	5.74347e+06	62327	0.215051	73170	1.23753e+06	57390	6.15275e-06	68836	0.0332884	65003	6.16235	65003	2.64341	104640	1.48342e+07	54754	10.4023	95940
	48051	354062	91560	387930	91560	353403	91560	1.67984e+06	61756	9.42061e+06	94700	712631	94700	2.46356e+06	51269	0.937486	51269	0.000142021	70700	1.22533e+06	54165	0.00197915	72080	203851	72080	2.48581e+06	59040	0.000526431	59040	0.000981085	91800	5.76748e+06	62357	0.219575	73200	1.24487e+06	57410	6.29111e-06	68856	0.0336323	65023	6.20107	65023	2.6623	104660	1.48669e+07	54774	10.4935	95960
	48071	356063	91580	389478	91580	354721	91580	1.68648e+06	61776	9.4931e+06	94720	717171	94720	2.47423e+06	51289	0.953213	51289	0.000146036	70720	1.23137e+06	54185	0.00201886	72100	204561	72100	2.49845e+06	59070	0.00053923	59070	0.00100328	91830	5.79157e+06	62387	0.224189	73230	1.25224e+06	57430	6.43243e-06	68876	0.0339795	65043	6.24	65043	2.68131	104680	1.48997e+07	54794	10.5854	95980
	48091	358074	91600	391031	91600	356043	91600	1.69315e+06	61796	9.56609e+06	94740	721738	94740	2.48494e+06	51309	0.969186	51309	0.000150157	70740	1.23743e+06	54205	0.00205932	72120	205273	72120	2.51114e+06	59100	0.000552323	59100	0.00102596	91860	5.81575e+06	62417	0.228894	73260	1.25966e+06	57450	6.57677e-06	68896	0.0343301	65063	6.27916	65063	2.70045	104700	1.49326e+07	54814	10.678	96000
	48111	360095	91620	392589	91620	357369	91620	1.69983e+06	61816	9.6396e+06	94760	726332	94760	2.49569e+06	51329	0.985408	51329	0.000154388	70760	1.24351e+06	54225	0.00210054	72140	205987	72140	2.5239e+06	59130	0.000565716	59130	0.00104911	91890	5.84001e+06	62447	0.233692	73290	1.26711e+06	57470	6.72418e-06	68916	0.0346841	65083	6.31855	65083	2.71971	104720	1.49655e+07	54834	10.7714	96020
	48131	362125	91640	394153	91640	358700	91640	1.70655e+06	61836	9.71362e+06	94780	730952	94780	2.50648e+06	51349	1.00188	51349	0.00015873	70780	1.24962e+06	54245	0.00214254	72160	206704	72160	2.53671e+06	59160	0.000579416	59160	0.00107276	91920	5.86437e+06	62477	0.238584	73320	1.27461e+06	57490	6.87474e-06	68936	0.0350415	65103	6.35816	65103	2.7391	104740	1.49985e+07	54854	10.8655	96040
	48151	364166	91660	395723	91660	360035	91660	1.71328e+06	61856	9.78816e+06	94800	735600	94800	2.51732e+06	51369	1.01861	51369	0.000163186	70800	1.25576e+06	54265	0.00218533	72180	207422	72180	2.54959e+06	59190	0.00059343	59190	0.00109691	91950	5.88881e+06	62507	0.243572	73350	1.28214e+06	57510	7.02849e-06	68956	0.0354024	65123	6.39799	65123	2.75861	104760	1.50316e+07	54874	10.9604	96060
	48171	366216	91680	397298	91680	361375	91680	1.72004e+06	61876	9.86322e+06	94820	740276	94820	2.5282e+06	51389	1.0356	51389	0.00016776	70820	1.26193e+06	54285	0.00222893	72200	208143	72200	2.56252e+06	59220	0.000607764	59220	0.00112157	91980	5.91334e+06	62537	0.248658	73380	1.28971e+06	57530	7.18552e-06	68976	0.0357667	65143	6.43806	65143	2.77826	104780	1.50647e+07	54894	11.056	96080
	48191	368277	91700	398878	91700	362719	91700	1.72682e+06	61896	9.9388e+06	94840	744979	94840	2.53912e+06	51409	1.05286	51409	0.000172454	70840	1.26812e+06	54305	0.00227335	72220	208865	72220	2.5755e+06	59250	0.000622425	59250	0.00114676	92010	5.93796e+06	62567	0.253844	73410	1.29732e+06	57550	7.34588e-06	68996	0.0361346	65163	6.47835	65163	2.79803	104800	1.50979e+07	54914	11.1525	96100
	48211	370348	91720	400464	91720	364067	91720	1.73363e+06	61916	1.00149e+07	94860	749709	94860	2.55008e+06	51429	1.07038	51429	0.000177271	70860	1.27434e+06	54325	0.00231861	72240	209590	72240	2.58855e+06	59280	0.00063742	59280	0.00117248	92040	5.96266e+06	62597	0.259131	73440	1.30497e+06	57570	7.50964e-06	69016	0.036506	65183	6.51887	65183	2.81793	104820	1.51311e+07	54934	11.2496	96120
	48231	372428	91740	402056	91740	365420	91740	1.74046e+06	61936	1.00916e+07	94880	754468	94880	2.56109e+06	51449	1.08817	51449	0.000182214	70880	1.28058e+06	54345	0.00236471	72260	210317	72260	2.60166e+06	59310	0.000652757	59310	0.00119875	92070	5.98746e+06	62627	0.264522	73470	1.31265e+06	57590	7.67687e-06	69036	0.0368811	65203	6.55962	65203	2.83796	104840	1.51644e+07	54954	11.3476	96140
	48251	374519	91760	403654	91760	366778	91760	1.74731e+06	61956	1.01687e+07	94900	759254	94900	2.57214e+06	51469	1.10624	51469	0.000187286	70900	1.28686e+06	54365	0.00241168	72280	211046	72280	2.61482e+06	59340	0.000668442	59340	0.00122556	92100	6.01234e+06	62657	0.270018	73500	1.32038e+06	57610	7.84765e-06	69056	0.0372597	65223	6.60061	65223	2.85812	104860	1.51978e+07	54974	11.4464	96160
	48271	376620	91780	405257	91780	368139	91780	1.75419e+06	61976	1.02465e+07	94920	764069	94920	2.58323e+06	51489	1.12459	51489	0.000192491	70920	1.29316e+06	54385	0.00245953	72300	211777	72300	2.62805e+06	59370	0.000684484	59370	0.00125295	92130	6.03732e+06	62687	0.275621	73530	1.32815e+06	57630	8.02203e-06	69076	0.037642	65243	6.64182	65243	2.87841	104880	1.52312e+07	54994	11.5459	96180
	48291	378731	91800	406866	91800	369506	91800	1.7611e+06	61996	1.03247e+07	94940	768911	94940	2.59437e+06	51509	1.14321	51509	0.000197831	70940	1.29948e+06	54405	0.00250827	72320	212511	72320	2.64134e+06	59400	0.000700889	59400	0.00128091	92160	6.06238e+06	62717	0.281334	73560	1.33595e+06	57650	8.20009e-06	69096	0.038028	65263	6.68327	65263	2.89884	104900	1.52647e+07	55014	11.6462	96200
	48311	380852	91820	408480	91820	370876	91820	1.76802e+06	62016	1.04035e+07	94960	773782	94960	2.60555e+06	51529	1.16213	51529	0.000203311	70960	1.30584e+06	54425	0.00255792	72340	213246	72340	2.65468e+06	59430	0.000717666	59430	0.00130946	92190	6.08754e+06	62747	0.287158	73590	1.3438e+06	57670	8.38191e-06	69116	0.0384177	65283	6.72496	65283	2.9194	104920	1.52982e+07	55034	11.7474	96220
	48331	382983	91840	410100	91840	372251	91840	1.77497e+06	62036	1.04829e+07	94980	778682	94980	2.61677e+06	51549	1.18134	51549	0.000208932	70980	1.31222e+06	54445	0.0026085	72360	213984	72360	2.66809e+06	59460	0.000734822	59460	0.00133861	92220	6.11278e+06	62777	0.293094	73620	1.35169e+06	57690	8.56756e-06	69136	0.0388111	65303	6.76688	65303	2.94009	104940	1.53319e+07	55054	11.8493	96240
	48351	385125	91860	411726	91860	373631	91860	1.78195e+06	62056	1.05628e+07	95000	783610	95000	2.62803e+06	51569	1.20084	51569	0.000214699	71000	1.31863e+06	54465	0.00266002	72380	214724	72380	2.68155e+06	59490	0.000752366	59490	0.00136837	92250	6.13812e+06	62807	0.299147	73650	1.35962e+06	57710	8.75712e-06	69156	0.0392084	65323	6.80905	65323	2.96092	104960	1.53655e+07	55074	11.9521	96260
	48371	387277	91880	413358	91880	375015	91880	1.78895e+06	62076	1.06433e+07	95020	788568	95020	2.63934e+06	51589	1.22064	51589	0.000220615	71020	1.32507e+06	54485	0.00271251	72400	215466	72400	2.69508e+06	59520	0.000770305	59520	0.00139876	92280	6.16355e+06	62837	0.305316	73680	1.36758e+06	57730	8.95066e-06	69176	0.0396094	65343	6.85145	65343	2.98188	104980	1.53993e+07	55094	12.0557	96280
	48391	389439	91900	414995	91900	376404	91900	1.79597e+06	62096	1.07243e+07	95040	793554	95040	2.6507e+06	51609	1.24075	51609	0.000226685	71040	1.33153e+06	54505	0.00276597	72420	216210	72420	2.70867e+06	59550	0.000788649	59550	0.00142978	92310	6.18907e+06	62867	0.311605	73710	1.37559e+06	57750	9.14827e-06	69196	0.0400144	65363	6.89409	65363	3.00298	105000	1.54331e+07	55114	12.1601	96300
	48411	391612	91920	416638	91920	377797	91920	1.80302e+06	62116	1.08059e+07	95060	798569	95060	2.6621e+06	51629	1.26116	51629	0.00023291	71060	1.33802e+06	54525	0.00282042	72440	216957	72440	2.72232e+06	59580	0.000807405	59580	0.00146145	92340	6.21468e+06	62897	0.318015	73740	1.38364e+06	57770	9.35003e-06	69216	0.0404232	65383	6.93697	65383	3.02422	105020	15466952	55134	12.2653	96320
	48431	393796	91940	418287	91940	379195	91940	1.81009e+06	62136	1.0888e+07	95080	803614	95080	2.67354e+06	51649	1.28189	51649	0.000239296	71080	1.34454e+06	54545	0.00287588	72460	217706	72460	2.73603e+06	59610	0.000826583	59610	0.00149379	92370	6.24038e+06	62927	0.32455	73770	1.39173e+06	57790	9.55601e-06	69236	0.0408359	65403	6.9801	65403	3.04559	105040	1.55009e+07	55154	12.3714	96340
	48451	395990	91960	419942	91960	380598	91960	1.81719e+06	62156	1.09707e+07	95100	808688	95100	2.68502e+06	51669	1.30293	51669	0.000245846	71100	1.35109e+06	54565	0.00293237	72480	218456	72480	2.7498e+06	59640	0.000846191	59640	0.00152679	92400	6.26617e+06	62957	0.33121	73800	1.39986e+06	57810	9.76631e-06	69256	0.0412526	65423	7.02347	65423	3.06711	105060	1.55349e+07	55174	12.4783	96360
	48471	398194	91980	421602	91980	382005	91980	1.82431e+06	62176	1.1054e+07	95120	813792	95120	2.69655e+06	51689	1.32429	51689	0.000252564	71120	1.35767e+06	54585	0.00298991	72500	219210	72500	2.76364e+06	59670	0.000866239	59670	0.00156049	92430	6.29206e+06	62987	0.337999	73830	1.40804e+06	57830	9.981e-06	69276	0.0416732	65443	7.06708	65443	3.08876	105080	1.55689e+07	55194	12.5861	96380
	48491	400409	92000	423269	92000	383416	92000	1.83146e+06	62196	1.11379e+07	95140	818926	95140	2.70813e+06	51709	1.34598	51709	0.000259455	71140	1.36427e+06	54605	0.00304851	72520	219965	72520	2.77753e+06	59700	0.000886735	59700	0.00159489	92460	6.31803e+06	63017	0.344918	73860	1.41625e+06	57850	1.02002e-05	69296	0.0420979	65463	7.11094	65463	3.11055	105100	1.56031e+07	55214	12.6947	96400
	48511	402635	92020	424941	92020	384832	92020	1.83863e+06	62216	1.12224e+07	95160	824089	95160	2.71975e+06	51729	1.368	51729	0.000266521	71160	1.37091e+06	54625	0.00310819	72540	220722	72540	2.79149e+06	59730	0.000907689	59730	0.00163	92490	6.34411e+06	63047	0.35197	73890	1.42451e+06	57870	1.04239e-05	69316	0.0425267	65483	7.15505	65483	3.13249	105120	1.56372e+07	55234	12.8042	96420
	48531	404871	92040	426619	92040	386253	92040	1.84583e+06	62236	1.13074e+07	95180	829283	95180	2.73141e+06	51749	1.39035	51749	0.000273768	71180	1.37757e+06	54645	0.00316898	72560	221482	72560	2.80552e+06	59760	0.000929112	59760	0.00166584	92520	6.37027e+06	63077	0.359158	73920	1.43281e+06	57890	1.06523e-05	69336	0.0429596	65503	7.19941	65503	3.15457	105140	1.56715e+07	55254	12.9146	96440
	48551	407118	92060	428303	92060	387679	92060	1.85305e+06	62256	1.1393e+07	95200	834507	95200	2.74312e+06	51769	1.41305	51769	0.000281199	71200	1.38426e+06	54665	0.00323089	72580	222244	72580	2.8196e+06	59790	0.000951012	59790	0.00170242	92550	6.39653e+06	63107	0.366483	73950	1.44115e+06	57910	1.08855e-05	69356	0.0433966	65523	7.24402	65523	3.17679	105160	1.57058e+07	55274	13.0258	96460
	48571	409376	92080	429993	92080	389109	92080	1.8603e+06	62276	1.14792e+07	95220	839761	95220	2.75488e+06	51789	1.43609	51789	0.00028882	71220	1.39098e+06	54685	0.00329393	72600	223009	72600	2.83375e+06	59820	0.000973399	59820	0.00173976	92580	6.42288e+06	63137	0.373949	73980	1.44953e+06	57930	1.11235e-05	69376	0.0438378	65543	7.28888	65543	3.19915	105180	1.57402e+07	55294	13.138	96480
	48591	411645	92100	431689	92100	390543	92100	1.86757e+06	62296	1.1566e+07	95240	845047	95240	2.76668e+06	51809	1.45947	51809	0.000296634	71240	1.39772e+06	54705	0.00335814	72620	223775	72620	2.84796e+06	59850	0.000996285	59850	0.00177787	92610	6.44932e+06	63167	0.381557	74010	1.45795e+06	57950	1.13665e-05	69396	0.0442832	65563	7.334	65563	3.22166	105200	1.57746e+07	55314	13.251	96500
	48611	413924	92120	433391	92120	391983	92120	1.87487e+06	62316	1.16534e+07	95260	850362	95260	2.77853e+06	51829	1.48321	51829	0.000304647	71260	1.4045e+06	54725	0.00342352	72640	224544	72640	2.86224e+06	59880	0.00101968	59880	0.00181677	92640	6.47586e+06	63197	0.389311	74040	1.46642e+06	57970	1.16145e-05	69416	0.0447329	65583	7.37936	65583	3.24431	105220	1.58091e+07	55334	13.3649	96520
	48631	416215	92140	435098	92140	393427	92140	1.88219e+06	62336	1.17414e+07	95280	855709	95280	2.79042e+06	51849	1.50731	51849	0.000312862	71280	1.4113e+06	54745	0.00349011	72660	225315	72660	2.87657e+06	59910	0.00104359	59910	0.00185647	92670	6.5025e+06	63227	0.397213	74070	1.47493e+06	57990	1.18677e-05	69436	0.0451868	65603	7.42499	65603	3.26711	105240	1.58437e+07	55354	13.4797	96540
	48651	418516	92160	436812	92160	394876	92160	1.88954e+06	62356	1.18301e+07	95300	861087	95300	2.80236e+06	51869	1.53178	51869	0.000321285	71300	1.41814e+06	54765	0.00355792	72680	226088	72680	2.89098e+06	59940	0.00106803	59940	0.00189699	92700	6.52923e+06	63257	0.405265	74100	1.48349e+06	58010	1.21261e-05	69456	0.0456451	65623	7.47087	65623	3.29006	105260	1.58783e+07	55374	13.5954	96560
	48671	420828	92180	438532	92180	396329	92180	1.89692e+06	62376	1.19193e+07	95320	866496	95320	2.81434e+06	51889	1.55661	51889	0.00032992	71320	1.425e+06	54785	0.00362697	72700	226864	72700	2.90545e+06	59970	0.00109302	59970	0.00193835	92730	6.55605e+06	63287	0.41347	74130	1.49208e+06	58030	1.23898e-05	69476	0.0461077	65643	7.51701	65643	3.31316	105280	1.5913e+07	55394	13.712	96580
	48691	423151	92200	440258	92200	397787	92200	1.90432e+06	62396	1.20091e+07	95340	871937	95340	2.82637e+06	51909	1.58182	51909	0.000338774	71340	1.43189e+06	54805	0.00369728	72720	227642	72720	2.91998e+06	60000	0.00111855	60000	0.00198055	92760	6.58297e+06	63317	0.421831	74160	1.50073e+06	58050	1.2659e-05	69496	0.0465748	65663	7.5634	65663	3.3364	105300	1.59478e+07	55414	13.8295	96600
	48711	425486	92220	441989	92220	399250	92220	1.91174e+06	62416	1.20996e+07	95360	877409	95360	2.83845e+06	51929	1.60741	51929	0.000347849	71360	1.43882e+06	54825	0.00376888	72740	228422	72740	2.93458e+06	60030	0.00114465	60030	0.00202362	92790	6.60998e+06	63347	0.430351	74190	1.50941e+06	58070	1.29338e-05	69516	0.0470462	65683	7.61006	65683	3.3598	105320	1.59826e+07	55434	13.948	96620
	48731	427831	92240	443727	92240	400718	92240	1.91919e+06	62436	1.21907e+07	95380	882913	95380	2.85057e+06	51949	1.63338	51949	0.000357153	71380	1.44577e+06	54845	0.00384178	72760	229204	72760	2.94924e+06	60060	0.00117133	60060	0.00206757	92820	6.6371e+06	63377	0.439033	74220	1.51814e+06	58090	1.32142e-05	69536	0.0475222	65703	7.65698	65703	3.38334	105340	1.60175e+07	55454	14.0674	96640
	48751	430188	92260	445471	92260	402190	92260	1.92667e+06	62456	1.22824e+07	95400	888449	95400	2.86274e+06	51969	1.65974	51969	0.00036669	71400	1.45275e+06	54865	0.00391602	72780	229989	72780	2.96397e+06	60090	0.00119859	60090	0.00211242	92850	6.6643e+06	63407	0.447879	74250	1.52691e+06	58110	1.35004e-05	69556	0.0480027	65723	7.70416	65723	3.40704	105360	1.60525e+07	55474	14.1878	96660
	48771	432556	92280	447221	92280	403668	92280	1.93417e+06	62476	1.23747e+07	95420	894017	95420	2.87496e+06	51989	1.6865	51989	0.000376466	71420	1.45976e+06	54885	0.0039916	72800	230776	72800	2.97876e+06	60120	0.00122645	60120	0.00215819	92880	6.69161e+06	63437	0.456892	74280	1.53573e+06	58130	1.37925e-05	69576	0.0484878	65743	7.75161	65743	3.43089	105380	1.60875e+07	55494	14.309	96680
	48791	434935	92300	448977	92300	405150	92300	1.9417e+06	62496	1.24677e+07	95440	899617	95440	2.88722e+06	52009	1.71366	52009	0.000386486	71440	1.4668e+06	54905	0.00406856	72820	231565	72820	2.99362e+06	60150	0.00125492	60150	0.0022049	92910	6.71901e+06	63467	0.466075	74310	1.54459e+06	58150	1.40906e-05	69596	0.0489774	65763	7.79933	65763	3.45489	105400	1.61226e+07	55514	14.4313	96700
	48811	437325	92320	450740	92320	406637	92320	1.94926e+06	62516	1.25613e+07	95460	905250	95460	2.89953e+06	52029	1.74122	52029	0.000396756	71460	1.47387e+06	54925	0.00414692	72840	232357	72840	3.00855e+06	60180	0.00128402	60180	0.00225256	92940	6.7465e+06	63497	0.475432	74340	1.55349e+06	58170	1.43948e-05	69616	0.0494717	65783	7.84731	65783	3.47905	105420	1.61578e+07	55534	14.5545	96720
	48831	439727	92340	452508	92340	408128	92340	1.95684e+06	62536	1.26555e+07	95480	910915	95480	2.91189e+06	52049	1.7692	52049	0.000407282	71480	1.48097e+06	54945	0.0042267	72860	233150	72860	3.02354e+06	60210	0.00131375	60210	0.00230118	92970	6.7741e+06	63527	0.484965	74370	1.56244e+06	58190	1.47052e-05	69636	0.0499707	65803	7.89556	65803	3.50336	105440	1.6193e+07	55554	14.6787	96740
	48851	442140	92360	454283	92360	409625	92360	1.96445e+06	62556	1.27504e+07	95500	916614	95500	2.9243e+06	52069	1.79759	52069	0.000418069	71500	1.4881e+06	54965	0.00430793	72880	233947	72880	3.0386e+06	60240	0.00134413	60240	0.0023508	93000	6.80179e+06	63557	0.494677	74400	1.57143e+06	58210	1.5022e-05	69656	0.0504744	65823	7.94408	65823	3.52783	105460	1.62283e+07	55574	14.8038	96760
	48871	444565	92380	456063	92380	411126	92380	1.97208e+06	62576	1.28459e+07	95520	922345	95520	2.93675e+06	52089	1.82641	52089	0.000429125	71520	1.49526e+06	54985	0.00439063	72900	234745	72900	3.05373e+06	60270	0.00137518	60270	0.00240143	93030	6.82958e+06	63587	0.504572	74430	1.58047e+06	58230	1.53453e-05	69676	0.0509829	65843	7.99287	65843	3.55245	105480	1.62636e+07	55594	14.9299	96780
	48891	447001	92400	457850	92400	412632	92400	1.97974e+06	62596	1.29421e+07	95540	928109	95540	2.94925e+06	52109	1.85566	52109	0.000440454	71540	1.50246e+06	55005	0.00447483	72920	235546	72920	3.06892e+06	60300	0.00140691	60300	0.00245308	93060	6.85747e+06	63617	0.514652	74460	1.58956e+06	58250	1.56753e-05	69696	0.0514962	65863	8.04194	65863	3.57724	105500	1.6299e+07	55614	15.0571	96800
	48911	449448	92420	459643	92420	414143	92420	1.98743e+06	62616	1.30389e+07	95560	933907	95560	2.9618e+06	52129	1.88534	52129	0.000452064	71560	1.50968e+06	55025	0.00456055	72940	236349	72940	3.08418e+06	60330	0.00143932	60330	0.00250578	93090	6.88546e+06	63647	0.524922	74490	1.59869e+06	58270	1.60119e-05	69716	0.0520143	65883	8.09127	65883	3.60218	105520	1.63345e+07	55634	15.1852	96820
	48931	451907	92440	461443	92440	415659	92440	1.99514e+06	62636	1.31365e+07	95580	939738	95580	2.9744e+06	52149	1.91546	52149	0.000463961	71580	1.51693e+06	55045	0.00464782	72960	237155	72960	3.09951e+06	60360	0.00147244	60360	0.00255955	93120	6.91354e+06	63677	0.535384	74520	1.60787e+06	58290	1.63554e-05	69736	0.0525374	65903	8.14089	65903	3.62728	105540	1.63701e+07	55654	15.3143	96840
	48951	454378	92460	463249	92460	417180	92460	2.00288e+06	62656	1.32346e+07	95600	945602	95600	2.98704e+06	52169	1.94604	52169	0.000476151	71600	1.52421e+06	55065	0.00473666	72980	237962	72980	3.11491e+06	60390	0.00150629	60390	0.00261441	93150	6.94173e+06	63707	0.546041	74550	1.61709e+06	58310	1.6706e-05	69756	0.0530654	65923	8.19078	65923	3.65254	105560	1.64057e+07	55674	15.4444	96860
	48971	456860	92480	465061	92480	418706	92480	2.01065e+06	62676	1.33335e+07	95620	951501	95620	2.99974e+06	52189	1.97706	52189	0.000488642	71620	1.53153e+06	55085	0.0048271	73000	238773	73000	3.13037e+06	60420	0.00154086	60420	0.00267037	93180	6.97001e+06	63737	0.556898	74580	1.62636e+06	58330	1.70636e-05	69776	0.0535983	65943	8.24095	65943	3.67797	105580	1.64413e+07	55694	15.5756	96880
	48991	459354	92500	466879	92500	420237	92500	2.01844e+06	62696	1.3433e+07	95640	957434	95640	3.01248e+06	52209	2.00855	52209	0.000501439	71640	1.53887e+06	55105	0.00491917	73020	239585	73020	3.14591e+06	60450	0.00157619	60450	0.00272746	93210	6.9984e+06	63767	0.567957	74610	1.63567e+06	58350	1.74286e-05	69796	0.0541363	65963	8.2914	65963	3.70355	105600	1.64771e+07	55714	15.7077	96900
	49011	461860	92520	468703	92520	421772	92520	2.02626e+06	62716	1.35332e+07	95660	963401	95660	3.02527e+06	52229	2.0405	52229	0.000514551	71660	1.54625e+06	55125	0.00501289	73040	240400	73040	3.16151e+06	60480	0.00161228	60480	0.00278571	93240	7.02688e+06	63797	0.579222	74640	1.64503e+06	58370	1.78009e-05	69816	0.0546794	65983	8.34213	65983	3.7293	105620	1.65129e+07	55734	15.8409	96920
	49031	464377	92540	470534	92540	423313	92540	2.03411e+06	62736	1.3634e+07	95680	969402	95680	3.03811e+06	52249	2.07292	52249	0.000527984	71680	1.55365e+06	55145	0.0051083	73060	241217	73060	3.17718e+06	60510	0.00164915	60510	0.00284512	93270	7.05547e+06	63827	0.590697	74670	1.65444e+06	58390	1.81808e-05	69836	0.0552276	66003	8.39314	66003	3.75522	105640	1.65488e+07	55754	15.9751	96940
	49051	466907	92560	472372	92560	424858	92560	2.04198e+06	62756	1.37356e+07	95700	975438	95700	3.051e+06	52269	2.10582	52269	0.000541746	71700	1.56109e+06	55165	0.00520542	73080	242037	73080	3.19293e+06	60540	0.00168682	60540	0.00290573	93300	7.08415e+06	63857	0.602385	74700	1.66389e+06	58410	1.85684e-05	69856	0.0557809	66023	8.44443	66023	3.7813	105660	1.65847e+07	55774	16.1104	96960
	49071	469448	92580	474215	92580	426409	92580	2.04988e+06	62776	1.38378e+07	95720	981508	95720	3.06394e+06	52289	2.13921	52289	0.000555845	71720	1.56856e+06	55185	0.00530428	73100	242859	73100	3.20874e+06	60570	0.0017253	60570	0.00296756	93330	7.11294e+06	63887	0.61429	74730	1.67339e+06	58430	1.89639e-05	69876	0.0563395	66043	8.49602	66043	3.80754	105680	1.66207e+07	55794	16.2468	96980
	49091	472001	92600	476065	92600	427964	92600	2.05781e+06	62796	1.39408e+07	95740	987614	95740	3.07693e+06	52309	2.17309	52309	0.000570287	71740	1.57606e+06	55205	0.00540491	73120	243684	73120	3.22462e+06	60600	0.00176461	60600	0.00303063	93360	7.14182e+06	63917	0.626416	74760	1.68294e+06	58450	1.93674e-05	69896	0.0569033	66063	8.54788	66063	3.83396	105700	1.66568e+07	55814	16.3842	97000
	49111	474566	92620	477922	92620	429525	92620	2.06576e+06	62816	1.40444e+07	95760	993755	95760	3.08996e+06	52329	2.20746	52329	0.000585081	71760	1.5836e+06	55225	0.00550733	73140	244510	73140	3.24057e+06	60630	0.00180476	60630	0.00309496	93390	7.17081e+06	63947	0.638766	74790	1.69254e+06	58470	1.9779e-05	69916	0.0574724	66083	8.60004	66083	3.86054	105720	1.6693e+07	55834	16.5226	97020
	49131	477144	92640	479785	92640	431090	92640	2.07375e+06	62836	1.41487e+07	95780	999931	95780	3.10305e+06	52349	2.24235	52349	0.000600234	71780	1.59116e+06	55245	0.00561159	73160	245340	73160	3.25659e+06	60660	0.00184578	60660	0.00316057	93420	7.1999e+06	63977	0.651345	74820	1.70218e+06	58490	2.01989e-05	69936	0.0580468	66103	8.65249	66103	3.88729	105740	1.67292e+07	55854	16.6622	97040
	49151	479733	92660	481654	92660	432661	92660	2.08176e+06	62856	1.42538e+07	95800	1.00614e+06	95800	3.11619e+06	52369	2.27774	52369	0.000615756	71800	1.59876e+06	55265	0.00571771	73180	246171	73180	3.27268e+06	60690	0.00188768	60690	0.0032275	93450	7.22909e+06	64007	0.664157	74850	1.71187e+06	58510	2.06273e-05	69956	0.0586267	66123	8.70522	66123	3.91421	105760	1.67655e+07	55874	16.8028	97060
	49171	482334	92680	483530	92680	434237	92680	2.08979e+06	62876	1.43595e+07	95820	1.01239e+06	95820	3.12938e+06	52389	2.31365	52389	0.000631654	71820	1.60639e+06	55285	0.00582572	73200	247005	73200	3.28885e+06	60720	0.00193047	60720	0.00329576	93480	7.25839e+06	64037	0.677204	74880	1.72161e+06	58530	2.10644e-05	69976	0.0592119	66143	8.75825	66143	3.9413	105780	1.68018e+07	55894	16.9445	97080
	49191	484948	92700	485412	92700	435817	92700	2.09786e+06	62896	1.4466e+07	95840	1.01867e+06	95840	3.14262e+06	52409	2.3501	52409	0.000647937	71840	1.61405e+06	55305	0.00593565	73220	247842	73220	3.30508e+06	60750	0.00197418	60750	0.00336539	93510	7.28779e+06	64067	0.690493	74910	1.7314e+06	58550	2.15102e-05	69996	0.0598027	66163	8.81157	66163	3.96857	105800	1.68382e+07	55914	17.0873	97100
	49211	487573	92720	487301	92720	437403	92720	2.10595e+06	62916	1.45732e+07	95860	1.02499e+06	95860	3.1559e+06	52429	2.38707	52429	0.000664613	71860	1.62174e+06	55325	0.00604754	73240	248680	73240	3.32139e+06	60780	0.00201883	60780	0.0034364	93540	7.31729e+06	64097	0.704026	74940	1.74124e+06	58570	2.1965e-05	70016	0.060399	66183	8.86519	66183	3.99601	105820	1.68747e+07	55934	17.2312	97120
	49231	490211	92740	489197	92740	438994	92740	2.11407e+06	62936	1.46811e+07	95880	1.03135e+06	95880	3.16924e+06	52449	2.42458	52449	0.000681691	71880	1.62946e+06	55345	0.00616141	73260	249522	73260	3.33777e+06	60810	0.00206443	60810	0.00350882	93570	7.34689e+06	64127	0.717807	74970	1.75112e+06	58590	2.2429e-05	70036	0.0610009	66203	8.91911	66203	4.02362	105840	1.69112e+07	55954	17.3763	97140
	49251	492862	92760	491099	92760	440590	92760	2.12222e+06	62956	1.47897e+07	95900	1.03774e+06	95900	3.18263e+06	52469	2.46264	52469	0.000699181	71900	1.63722e+06	55365	0.00627731	73280	250365	73280	3.35422e+06	60840	0.002111	60840	0.00358268	93600	7.3766e+06	64157	0.731842	75000	1.76105e+06	58610	2.29022e-05	70056	0.0616084	66223	8.97332	66223	4.05141	105860	1.69479e+07	55974	17.5224	97160
	49271	495524	92780	493007	92780	442191	92780	2.1304e+06	62976	1.48991e+07	95920	1.04417e+06	95920	3.19607e+06	52489	2.50126	52489	0.000717091	71920	1.64501e+06	55385	0.00639525	73300	251211	73300	3.37074e+06	60870	0.00215857	60870	0.003658	93630	7.40641e+06	64187	0.746134	75030	1.77104e+06	58630	2.3385e-05	70076	0.0622216	66243	9.02784	66243	4.07937	105880	1.69845e+07	55994	17.6697	97180
	49291	498199	92800	494922	92800	443797	92800	2.1386e+06	62996	1.50092e+07	95940	1.05063e+06	95940	3.20957e+06	52509	2.54044	52509	0.000735432	71940	1.65283e+06	55405	0.00651529	73320	252060	73320	3.38734e+06	60900	0.00220714	60900	0.00373482	93660	7.43632e+06	64217	0.760688	75060	1.78107e+06	58650	2.38774e-05	70096	0.0628405	66263	9.08265	66263	4.10751	105900	1.70213e+07	56014	17.8181	97200
	49311	500887	92820	496844	92820	445409	92820	2.14684e+06	63016	1.51201e+07	95960	1.05713e+06	95960	3.22311e+06	52529	2.58019	52529	0.000754212	71960	1.66069e+06	55425	0.00663745	73340	252911	73340	3.40401e+06	60930	0.00225675	60930	0.00381316	93690	7.46634e+06	64247	0.775508	75090	1.79115e+06	58670	2.43796e-05	70116	0.0634652	66283	9.13777	66283	4.13583	105920	1.70581e+07	56034	17.9677	97220
	49331	503587	92840	498772	92840	447025	92840	2.1551e+06	63036	1.52317e+07	95980	1.06367e+06	95980	3.23671e+06	52549	2.62052	52549	0.000773442	71980	1.66858e+06	55445	0.00676177	73360	253764	73360	3.42075e+06	60960	0.00230742	60960	0.00389304	93720	7.49647e+06	64277	0.7906	75120	1.80128e+06	58690	2.48919e-05	70136	0.0640958	66303	9.19319	66303	4.16433	105940	1.7095e+07	56054	18.1184	97240
	49351	506299	92860	500707	92860	448647	92860	2.16338e+06	63056	1.5344e+07	96000	1.07025e+06	96000	3.25035e+06	52569	2.66143	52569	0.000793132	72000	1.6765e+06	55465	0.00688829	73380	254620	73380	3.43756e+06	60990	0.00235915	60990	0.0039745	93750	7.5267e+06	64307	0.805966	75150	1.81146e+06	58710	2.54144e-05	70156	0.0647322	66323	9.24892	66323	4.19301	105960	1.7132e+07	56074	18.2703	97260
	49371	509024	92880	502649	92880	450274	92880	2.1717e+06	63076	1.54571e+07	96020	1.07687e+06	96020	3.26405e+06	52589	2.70294	52589	0.000813291	72020	1.68445e+06	55485	0.00701703	73400	255479	73400	3.45445e+06	61020	0.00241198	61020	0.00405757	93780	7.55703e+06	64337	0.821613	75180	1.82169e+06	58730	2.59474e-05	70176	0.0653745	66343	9.30495	66343	4.22187	105980	1.7169e+07	56094	18.4234	97280
	49391	511762	92900	504597	92900	451906	92900	2.18005e+06	63096	1.5571e+07	96040	1.08352e+06	96040	3.2778e+06	52609	2.74505	52609	0.000833931	72040	1.69244e+06	55505	0.00714805	73420	256339	73420	3.47142e+06	61050	0.00246593	61050	0.00414228	93810	7.58747e+06	64367	0.837545	75210	1.83197e+06	58750	2.64909e-05	70196	0.0660229	66363	9.3613	66363	4.25091	106000	1.72061e+07	56114	18.5776	97300
	49411	514512	92920	506552	92920	453543	92920	2.18842e+06	63116	1.56856e+07	96060	1.09021e+06	96060	3.2916e+06	52629	2.78776	52629	0.000855061	72060	1.70046e+06	55525	0.00728137	73440	257203	73440	3.48845e+06	61080	0.00252102	61080	0.00422865	93840	7.61802e+06	64397	0.853766	75240	1.8423e+06	58770	2.70453e-05	70216	0.0666772	66383	9.41795	66383	4.28013	106020	1.72432e+07	56134	18.7331	97320
	49431	517275	92940	508514	92940	455186	92940	2.19682e+06	63136	1.5801e+07	96080	1.09694e+06	96080	3.30546e+06	52649	2.8311	52649	0.000876694	72080	1.70851e+06	55545	0.00741703	73460	258069	73460	3.50557e+06	61110	0.00257726	61110	0.00431671	93870	7.64867e+06	64427	0.870282	75270	1.85269e+06	58790	2.76107e-05	70236	0.0673377	66403	9.47492	66403	4.30954	106040	1.72805e+07	56154	18.8897	97340
	49451	520051	92960	510482	92960	456834	92960	2.20526e+06	63156	1.59172e+07	96100	1.1037e+06	96100	3.31937e+06	52669	2.87506	52669	0.000898839	72100	1.7166e+06	55565	0.00755507	73480	258937	73480	3.52275e+06	61140	0.0026347	61140	0.00440651	93900	7.67943e+06	64457	0.887098	75300	1.86312e+06	58810	2.81873e-05	70256	0.0680043	66423	9.5322	66423	4.33914	106060	1.73178e+07	56174	19.0475	97360
	49471	522840	92980	512458	92980	458487	92980	2.21372e+06	63176	1.60341e+07	96120	1.11051e+06	96120	3.33333e+06	52689	2.91965	52689	0.000921509	72120	1.72472e+06	55585	0.00769553	73500	259808	73500	3.54002e+06	61170	0.00269334	61170	0.00449806	93930	7.7103e+06	64487	0.904219	75330	1.8736e+06	58830	2.87754e-05	70276	0.0686771	66443	9.58979	66443	4.36892	106080	1.73551e+07	56194	19.2065	97380
	49491	525642	93000	514440	93000	460145	93000	2.2222e+06	63196	1.61518e+07	96140	1.11735e+06	96140	3.34734e+06	52709	2.96489	52709	0.000944715	72140	1.73288e+06	55605	0.00783846	73520	260681	73520	3.55735e+06	61200	0.00275321	61200	0.00459141	93960	7.74127e+06	64517	0.92165	75360	1.88414e+06	58850	2.93751e-05	70296	0.0693562	66463	9.6477	66463	4.39889	106100	1.73926e+07	56214	19.3668	97400
	49511	528456	93020	516429	93020	461809	93020	2.23072e+06	63216	1.62703e+07	96160	1.12424e+06	96160	3.36141e+06	52729	3.01078	52729	0.000968469	72160	1.74107e+06	55625	0.00798388	73540	261557	73540	3.57477e+06	61230	0.00281435	61230	0.00468658	93990	7.77235e+06	64547	0.939395	75390	1.89473e+06	58870	2.99867e-05	70316	0.0700415	66483	9.70593	66483	4.42905	106120	1.74301e+07	56234	19.5283	97420
	49531	531284	93040	518424	93040	463478	93040	2.23927e+06	63236	1.63897e+07	96180	1.13116e+06	96180	3.37553e+06	52749	3.05733	52749	0.000992783	72180	1.74929e+06	55645	0.00813185	73560	262435	73560	3.59226e+06	61260	0.00287676	61260	0.00478361	94020	7.80354e+06	64577	0.957461	75420	1.90536e+06	58890	3.06104e-05	70336	0.0707332	66503	9.76448	66503	4.4594	106140	1.74676e+07	56254	19.691	97440
	49551	534124	93060	520427	93060	465152	93060	2.24785e+06	63256	1.65098e+07	96200	1.13812e+06	96200	3.3897e+06	52769	3.10455	52769	0.00101767	72200	1.75755e+06	55665	0.00828241	73580	263316	73580	3.60983e+06	61290	0.00294048	61290	0.00488254	94050	7.83484e+06	64607	0.975853	75450	1.91605e+06	58910	3.12464e-05	70356	0.0714313	66523	9.82335	66523	4.48994	106160	1.75053e+07	56274	19.855	97460
	49571	536978	93080	522436	93080	466832	93080	2.25645e+06	63276	1.66307e+07	96220	1.14512e+06	96220	3.40393e+06	52789	3.15244	52789	0.00104314	72220	1.76584e+06	55685	0.00843558	73600	264199	73600	3.62747e+06	61320	0.00300553	61320	0.00498339	94080	7.86624e+06	64637	0.994577	75480	1.9268e+06	58930	3.1895e-05	70376	0.0721359	66543	9.88254	66543	4.52067	106180	1.7543e+07	56294	20.0202	97480
	49591	539845	93100	524453	93100	468517	93100	2.26508e+06	63296	1.67524e+07	96240	1.15216e+06	96240	3.41821e+06	52809	3.20102	52809	0.00106921	72240	1.77417e+06	55705	0.00859143	73620	265085	73620	3.64519e+06	61350	0.00307194	61350	0.0050862	94110	7.89775e+06	64667	1.01364	75510	1.93759e+06	58950	3.25564e-05	70396	0.0728471	66563	9.94206	66563	4.5516	106200	1.75808e+07	56314	20.1867	97500
	49611	542725	93120	526476	93120	470207	93120	2.27375e+06	63316	1.68749e+07	96260	1.15924e+06	96260	3.43254e+06	52829	3.2503	52829	0.00109589	72260	1.78253e+06	55725	0.00874999	73640	265973	73640	3.66299e+06	61380	0.00313973	61380	0.00519101	94140	7.92938e+06	64697	1.03304	75540	1.94844e+06	58970	3.32307e-05	70416	0.0735648	66583	10.0019	66583	4.58272	106220	1.76186e+07	56334	20.3545	97520
	49631	545618	93140	528506	93140	471903	93140	2.28244e+06	63336	1.69983e+07	96280	1.16637e+06	96280	3.44693e+06	52849	3.30028	52849	0.00112319	72280	1.79092e+06	55745	0.00891131	73660	266864	73660	3.68086e+06	61410	0.00320894	61410	0.00529786	94170	7.96111e+06	64727	1.05279	75570	1.95934e+06	58990	3.39184e-05	70436	0.0742891	66603	10.0621	66603	4.61403	106240	1.76565e+07	56354	20.5235	97540
	49651	548525	93160	530543	93160	473604	93160	2.29116e+06	63356	1.71224e+07	96300	1.17353e+06	96300	3.46137e+06	52869	3.35097	52869	0.00115113	72300	1.79935e+06	55765	0.00907544	73680	267758	73680	3.69881e+06	61440	0.00327959	61440	0.00540677	94200	7.99295e+06	64757	1.0729	75600	1.9703e+06	59010	3.46196e-05	70456	0.0750201	66623	10.1226	66623	4.64554	106260	1.76945e+07	56374	20.6938	97560
	49671	551444	93180	532587	93180	475310	93180	2.29992e+06	63376	1.72474e+07	96320	1.18073e+06	96320	3.47587e+06	52889	3.40239	52889	0.00117972	72320	1.80782e+06	55785	0.0092424	73700	268654	73700	3.71684e+06	61470	0.0033517	61470	0.0055178	94230	8.02491e+06	64787	1.09336	75630	1.9813e+06	59030	3.53345e-05	70476	0.0757579	66643	10.1834	66643	4.67725	106280	1.77326e+07	56394	20.8655	97580
	49691	554378	93200	534639	93200	477022	93200	2.3087e+06	63396	1.73732e+07	96340	1.18797e+06	96340	3.49042e+06	52909	3.45454	52909	0.00120898	72340	1.81632e+06	55805	0.00941227	73720	269552	73720	3.73495e+06	61500	0.00342532	61500	0.00563097	94260	8.05697e+06	64817	1.11419	75660	1.99236e+06	59050	3.60635e-05	70496	0.0765025	66663	10.2446	66663	4.70916	106300	17770685	56414	21.0384	97600
	49711	557324	93220	536697	93220	478739	93220	2.31751e+06	63416	1.74999e+07	96360	1.19526e+06	96360	3.50503e+06	52929	3.50744	52929	0.00123892	72360	1.82485e+06	55825	0.00958507	73740	270453	73740	3.75314e+06	61530	0.00350045	61530	0.00574634	94290	8.08914e+06	64847	1.1354	75690	2.00348e+06	59070	3.68067e-05	70516	0.077254	66683	10.3061	66683	4.74126	106320	1.78089e+07	56434	21.2127	97620
	49731	560284	93240	538762	93240	480462	93240	2.32635e+06	63436	1.76274e+07	96380	1.20259e+06	96380	3.51969e+06	52949	3.56108	52949	0.00126955	72380	1.83342e+06	55845	0.00976087	73760	271357	73760	3.77141e+06	61560	0.00357715	61560	0.00586392	94320	8.12143e+06	64877	1.15698	75720	2.01464e+06	59090	3.75645e-05	70536	0.0780124	66703	10.3679	66703	4.77357	106340	1.78471e+07	56454	21.3883	97640
	49751	563258	93260	540834	93260	482191	93260	2.33522e+06	63456	1.77557e+07	96400	1.20995e+06	96400	3.53441e+06	52969	3.61549	52969	0.00130089	72400	1.84203e+06	55865	0.0099397	73780	272263	73780	3.78976e+06	61590	0.00365543	61590	0.00598378	94350	8.15382e+06	64907	1.17894	75750	2.02587e+06	59110	3.83372e-05	70556	0.0787778	66723	10.4301	66723	4.80608	106360	1.78855e+07	56474	21.5652	97660
	49771	566245	93280	542913	93280	483924	93280	2.34413e+06	63476	1.78849e+07	96420	1.21736e+06	96420	3.54918e+06	52989	3.67067	52989	0.00133296	72420	1.85067e+06	55885	0.0101216	73800	273172	73800	3.80818e+06	61620	0.00373533	61620	0.00610594	94380	8.18633e+06	64937	1.2013	75780	2.03714e+06	59130	3.91249e-05	70576	0.0795502	66743	10.4926	66743	4.83879	106380	1.79239e+07	56494	21.7435	97680
	49791	569246	93300	545000	93300	485664	93300	2.35306e+06	63496	1.8015e+07	96440	1.22481e+06	96440	3.56401e+06	53009	3.72663	53009	0.00136577	72440	1.85935e+06	55905	0.0103067	73820	274083	73820	3.82669e+06	61650	0.00381687	61650	0.00623045	94410	8.21895e+06	64967	1.22406	75810	2.04847e+06	59150	3.9928e-05	70596	0.0803297	66763	10.5554	66763	4.87171	106400	1.79624e+07	56514	21.9231	97700
	49811	572261	93320	547093	93320	487408	93320	2.36202e+06	63516	1.81459e+07	96460	1.23231e+06	96460	3.57889e+06	53029	3.78338	53029	0.00139934	72460	1.86806e+06	55925	0.0104949	73840	274997	73840	3.84528e+06	61680	0.0039001	61680	0.00635735	94440	8.25168e+06	64997	1.24722	75840	2.05986e+06	59170	4.07467e-05	70616	0.0811165	66783	10.6186	66783	4.90483	106420	1.80009e+07	56534	22.1041	97720
	49831	575289	93340	549194	93340	489159	93340	2.37101e+06	63536	1.82777e+07	96480	1.23984e+06	96480	3.59384e+06	53049	3.84094	53049	0.00143368	72480	1.87681e+06	55945	0.0106864	73860	275914	73860	3.86394e+06	61710	0.00398504	61710	0.00648668	94470	8.28453e+06	65027	1.27079	75870	2.0713e+06	59190	4.15814e-05	70636	0.0819104	66803	10.6822	66803	4.93816	106440	1.80395e+07	56554	22.2864	97740
	49851	578331	93360	551302	93360	490914	93360	2.38003e+06	63556	1.84103e+07	96500	1.24742e+06	96500	3.60883e+06	53069	3.89931	53069	0.0014688	72500	1.8856e+06	55965	0.0108812	73880	276833	73880	3.88269e+06	61740	0.00407172	61740	0.0066185	94500	8.31748e+06	65057	1.29477	75900	2.0828e+06	59210	4.24324e-05	70656	0.0827117	66823	10.746	66823	4.9717	106460	1.80782e+07	56574	22.4702	97760
	49871	581387	93380	553417	93380	492676	93380	2.38909e+06	63576	1.85438e+07	96520	1.25504e+06	96520	3.62388e+06	53089	3.9585	53089	0.00150474	72520	1.89442e+06	55985	0.0110793	73900	277755	73900	3.90152e+06	61770	0.00416018	61770	0.00675284	94530	8.35055e+06	65087	1.31919	75930	2.09435e+06	59230	4.32999e-05	70676	0.0835203	66843	10.8103	66843	5.00545	106480	1.8117e+07	56594	22.6553	97780
	49891	584457	93400	555539	93400	494443	93400	2.39817e+06	63596	1.86782e+07	96540	1.26271e+06	96540	3.63899e+06	53109	4.01853	53109	0.0015415	72540	1.90328e+06	56005	0.0112808	73920	278680	73920	3.92043e+06	61800	0.00425046	61800	0.00688974	94560	8.38374e+06	65117	1.34403	75960	2.10596e+06	59250	4.41842e-05	70696	0.0843363	66863	10.8749	66863	5.0394	106500	1.81558e+07	56614	22.8418	97800
	49911	587541	93420	557668	93420	496215	93420	2.40729e+06	63616	1.88135e+07	96560	1.27041e+06	96560	3.65416e+06	53129	4.0794	53129	0.0015791	72560	1.91217e+06	56025	0.0114858	73940	279607	73940	3.93942e+06	61830	0.00434259	61830	0.00702926	94590	8.41704e+06	65147	1.36931	75990	2.11762e+06	59270	4.50857e-05	70716	0.0851598	66883	10.9398	66883	5.07357	106520	1.81947e+07	56634	23.0298	97820
	49931	590639	93440	559805	93440	497994	93440	2.41643e+06	63636	1.89497e+07	96580	1.27816e+06	96580	3.66938e+06	53149	4.14113	53149	0.00161757	72580	1.9211e+06	56045	0.0116943	73960	280536	73960	3.9585e+06	61860	0.0044366	61860	0.00717144	94620	8.45045e+06	65177	1.39504	76020	2.12934e+06	59290	4.60047e-05	70736	0.0859908	66903	11.0051	66903	5.10795	106540	1.82337e+07	56654	23.2191	97840
	49951	593751	93460	561949	93460	499777	93460	2.42561e+06	63656	1.90868e+07	96600	1.28596e+06	96600	3.68466e+06	53169	4.20373	53169	0.00165691	72600	1.93007e+06	56065	0.0119063	73980	281469	73980	3.97766e+06	61890	0.00453253	61890	0.00731633	94650	8.48397e+06	65207	1.42122	76050	2.14111e+06	59310	4.69414e-05	70756	0.0868295	66923	11.0707	66923	5.14255	106560	1.82727e+07	56674	23.4099	97860
	49971	596877	93480	564100	93480	501567	93480	2.43482e+06	63676	1.92248e+07	96620	1.2938e+06	96620	3.7e+06	53189	4.26721	53189	0.00169714	72620	1.93907e+06	56085	0.012122	74000	282404	74000	3.9969e+06	61920	0.00463042	61920	0.00746397	94680	8.51762e+06	65237	1.44787	76080	2.15295e+06	59330	4.78963e-05	70776	0.0876758	66943	11.1367	66943	5.17736	106580	1.83118e+07	56694	23.6022	97880
	49991	600017	93500	566259	93500	503362	93500	2.44405e+06	63696	1.93637e+07	96640	1.30168e+06	96640	3.7154e+06	53209	4.33157	53209	0.00173829	72640	1.94811e+06	56105	0.0123413	74020	283341	74020	4.01622e+06	61950	0.00473031	61950	0.00761443	94710	8.55137e+06	65267	1.47498	76110	2.16483e+06	59350	4.88696e-05	70796	0.0885299	66963	11.203	66963	5.21238	106600	1.8351e+07	56714	23.7959	97900
	50011	603171	93520	568425	93520	505163	93520	2.45332e+06	63716	1.95035e+07	96660	1.30961e+06	96660	3.73085e+06	53229	4.39684	53229	0.00178038	72660	1.95719e+06	56125	0.0125644	74040	284281	74040	4.03562e+06	61980	0.00483223	61980	0.00776773	94740	8.58525e+06	65297	1.50256	76140	2.17678e+06	59370	4.98617e-05	70816	0.0893918	66983	11.2698	66983	5.24763	106620	1.83903e+07	56734	23.991	97920
	50031	606340	93540	570598	93540	506969	93540	2.46262e+06	63736	1.96442e+07	96680	1.31758e+06	96680	3.74636e+06	53249	4.46302	53249	0.00182343	72680	1.96631e+06	56145	0.0127913	74060	285224	74060	4.05511e+06	62010	0.00493622	62010	0.00792395	94770	8.61923e+06	65327	1.53063	76170	2.18878e+06	59390	5.08729e-05	70836	0.0902616	67003	11.3368	67003	5.28309	106640	1.84296e+07	56754	24.1876	97940
	50051	609523	93560	572778	93560	508781	93560	2.47195e+06	63756	1.97859e+07	96700	1.32559e+06	96700	3.76193e+06	53269	4.53013	53269	0.00186744	72700	1.97546e+06	56165	0.0130221	74080	286170	74080	4.07469e+06	62040	0.00504232	62040	0.00808312	94800	8.65334e+06	65357	1.55919	76200	2.20084e+06	59410	5.19036e-05	70856	0.0911393	67023	11.4043	67023	5.31877	106660	1.8469e+07	56774	24.3857	97960
	50071	612720	93580	574966	93580	510599	93580	2.48132e+06	63776	1.99285e+07	96720	1.33366e+06	96720	3.77755e+06	53289	4.59817	53289	0.00191246	72720	1.98465e+06	56185	0.0132567	74100	287118	74100	4.09435e+06	62070	0.00515058	62070	0.0082453	94830	8.68756e+06	65387	1.58826	76230	2.21296e+06	59430	5.29542e-05	70876	0.092025	67043	11.4721	67043	5.35467	106680	1.85085e+07	56794	24.5853	97980
	50091	615932	93600	577162	93600	512422	93600	2.49071e+06	63796	2.0072e+07	96740	1.34176e+06	96740	3.79324e+06	53309	4.66716	53309	0.00195849	72740	1.99388e+06	56205	0.0134954	74120	288069	74120	4.11409e+06	62100	0.00526103	62100	0.00841055	94860	8.7219e+06	65417	1.61782	76260	2.22514e+06	59450	5.40249e-05	70896	0.0929188	67063	11.5402	67063	5.3908	106700	1.8548e+07	56814	24.7864	98000
	50111	619158	93620	579365	93620	514252	93620	2.50014e+06	63816	2.02164e+07	96760	1.34992e+06	96760	3.80898e+06	53329	4.73711	53329	0.00200556	72760	2.00314e+06	56225	0.0137381	74140	289023	74140	4.13392e+06	62130	0.00537371	62130	0.00857892	94890	8.75635e+06	65447	1.64791	76290	2.23737e+06	59470	5.51162e-05	70916	0.0938208	67083	11.6088	67083	5.42715	106720	1.85876e+07	56834	24.989	98020
	50131	622399	93640	581575	93640	516087	93640	2.5096e+06	63836	2.03618e+07	96780	1.35811e+06	96780	3.82479e+06	53349	4.80804	53349	0.00205369	72780	2.01245e+06	56245	0.0139849	74160	289979	74160	4.15383e+06	62160	0.00548867	62160	0.00875046	94920	8.79092e+06	65477	1.67852	76320	2.24967e+06	59490	5.62285e-05	70936	0.0947309	67103	11.6777	67103	5.46372	106740	1.86273e+07	56854	25.1931	98040
	50151	625655	93660	583793	93660	517928	93660	2.51909e+06	63856	2.05082e+07	96800	1.36636e+06	96800	3.84065e+06	53369	4.87995	53369	0.00210291	72800	2.02179e+06	56265	0.0142359	74180	290938	74180	4.17383e+06	62190	0.00560595	62190	0.00892523	94950	8.82561e+06	65507	1.70966	76350	2.26202e+06	59510	5.7362e-05	70956	0.0956494	67123	11.7469	67123	5.50052	106760	1.86671e+07	56874	25.3988	98060
	50171	628925	93680	586018	93680	519774	93680	2.52861e+06	63876	2.06555e+07	96820	1.37465e+06	96820	3.85657e+06	53389	4.95286	53389	0.00215322	72820	2.03117e+06	56285	0.0144911	74200	291900	74200	4.19391e+06	62220	0.0057256	62220	0.00910329	94980	8.86042e+06	65537	1.74135	76380	2.27443e+06	59530	5.85173e-05	70976	0.0965762	67143	11.8166	67143	5.53755	106780	1.87069e+07	56894	25.606	98080
	50191	632209	93700	588251	93700	521627	93700	2.53816e+06	63896	2.08038e+07	96840	1.38299e+06	96840	3.87255e+06	53409	5.02678	53409	0.00220467	72840	2.04059e+06	56305	0.0147506	74220	292864	74220	4.21408e+06	62250	0.00584766	62250	0.00928469	95010	8.89535e+06	65567	1.77358	76410	2.2869e+06	59550	5.96947e-05	70996	0.0975114	67163	11.8866	67163	5.57481	106800	1.87468e+07	56914	25.8147	98100
	50211	635509	93720	590492	93720	523485	93720	2.54775e+06	63916	2.0953e+07	96860	1.39137e+06	96860	3.88859e+06	53429	5.10173	53429	0.00225727	72860	2.05004e+06	56325	0.0150146	74240	293831	74240	4.23434e+06	62280	0.00597217	62280	0.00946949	95040	8.9304e+06	65597	1.80637	76440	2.29943e+06	59570	6.08945e-05	71016	0.0984552	67183	11.957	67183	5.61229	106820	1.87868e+07	56934	26.025	98120
	50231	638823	93740	592739	93740	525349	93740	2.55736e+06	63936	2.11033e+07	96880	1.3998e+06	96880	3.90469e+06	53449	5.17771	53449	0.00231105	72880	2.05954e+06	56345	0.0152829	74260	294801	74260	4.25469e+06	62310	0.00609918	62310	0.00965776	95070	8.96556e+06	65627	1.83974	76470	2.31202e+06	59590	6.21173e-05	71036	0.0994075	67203	12.0278	67203	5.65001	106840	1.88268e+07	56954	26.2369	98140
	50251	642152	93760	594995	93760	527219	93760	2.56701e+06	63956	2.12545e+07	96900	1.40828e+06	96900	3.92085e+06	53469	5.25475	53469	0.00236602	72900	2.06907e+06	56365	0.0155558	74280	295774	74280	4.27512e+06	62340	0.00622874	62340	0.00984956	95100	9.00085e+06	65657	1.87367	76500	2.32467e+06	59610	6.33634e-05	71056	0.100368	67223	12.0989	67223	5.68796	106860	1.88669e+07	56974	26.4504	98160
	50271	645497	93780	597258	93780	529094	93780	2.5767e+06	63976	2.14067e+07	96920	1.4168e+06	96920	3.93707e+06	53489	5.33285	53489	0.00242223	72920	2.07864e+06	56385	0.0158333	74300	296749	74300	4.29564e+06	62370	0.0063609	62370	0.0100449	95130	9.03625e+06	65687	1.9082	76530	2.33737e+06	59630	6.46332e-05	71076	0.101338	67243	12.1705	67243	5.72614	106880	1.89071e+07	56994	26.6655	98180
	50291	648856	93800	599529	93800	530976	93800	2.58641e+06	63996	2.15598e+07	96940	1.42538e+06	96940	3.95335e+06	53509	5.41202	53509	0.00247968	72940	2.08825e+06	56405	0.0161154	74320	297727	74320	4.31624e+06	62400	0.0064957	62400	0.010244	95160	9.07177e+06	65717	1.94332	76560	2.35014e+06	59650	6.59272e-05	71096	0.102317	67263	12.2424	67263	5.76456	106900	1.89474e+07	57014	26.8821	98200
	50311	652230	93820	601808	93820	532864	93820	2.59616e+06	64016	2.1714e+07	96960	1.434e+06	96960	3.96969e+06	53529	5.49229	53529	0.00253841	72960	2.0979e+06	56425	0.0164023	74340	298708	74340	4.33694e+06	62430	0.0066332	62430	0.0104467	95190	9.10742e+06	65747	1.97905	76590	2.36297e+06	59670	6.72458e-05	71116	0.103304	67283	12.3147	67283	5.80322	106920	1.89877e+07	57034	27.1004	98220
	50331	655619	93840	604094	93840	534757	93840	2.60594e+06	64036	2.18692e+07	96980	1.44267e+06	96980	3.98609e+06	53549	5.57366	53549	0.00259844	72980	2.10759e+06	56445	0.016694	74360	299691	74360	4.35772e+06	62460	0.00677345	62460	0.0106532	95220	9.14319e+06	65777	2.0154	76620	2.37586e+06	59690	6.85895e-05	71136	0.1043	67303	12.3874	67303	5.84211	106940	1.90282e+07	57054	27.3204	98240
	50351	659023	93860	606388	93860	536657	93860	2.61575e+06	64056	2.20254e+07	97000	1.45138e+06	97000	4.00256e+06	53569	5.65615	53569	0.00265981	73000	2.11732e+06	56465	0.0169905	74380	300678	74380	4.37859e+06	62490	0.00691649	62490	0.0108636	95250	9.17907e+06	65807	2.05237	76650	2.38882e+06	59710	6.99586e-05	71156	0.105305	67323	12.4605	67323	5.88125	106960	1.90686e+07	57074	27.5419	98260
	50371	662443	93880	608689	93880	538562	93880	2.6256e+06	64076	2.21826e+07	97020	1.46015e+06	97020	4.01908e+06	53589	5.73978	53589	0.00272253	73020	2.12709e+06	56485	0.0172921	74400	301667	74400	4.39955e+06	62520	0.00706238	62520	0.0110779	95280	9.21508e+06	65837	2.08997	76680	2.40183e+06	59730	7.13537e-05	71176	0.10632	67343	12.534	67343	5.92062	106980	1.91092e+07	57094	27.7651	98280
	50391	665878	93900	610999	93900	540473	93900	2.63547e+06	64096	2.23408e+07	97040	1.46896e+06	97040	4.03567e+06	53609	5.82455	53609	0.00278664	73040	2.1369e+06	56505	0.0175986	74420	302659	74420	4.4206e+06	62550	0.00721118	62550	0.0112961	95310	9.25121e+06	65867	2.12822	76710	2.4149e+06	59750	7.27752e-05	71196	0.107343	67363	12.6079	67363	5.96024	107000	1.91498e+07	57114	27.99	98300
	50411	669328	93920	613316	93920	542390	93920	2.64539e+06	64116	2.25001e+07	97060	1.47783e+06	97060	4.05231e+06	53629	5.91049	53629	0.00285217	73060	2.14675e+06	56525	0.0179103	74440	303653	74440	4.44175e+06	62580	0.00736293	62580	0.0115184	95340	9.28747e+06	65897	2.16713	76740	2.42804e+06	59770	7.42237e-05	71216	0.108376	67383	12.6822	67383	6.00009	107020	1.91905e+07	57134	28.2165	98320
	50431	672794	93940	615641	93940	544314	93940	2.65533e+06	64136	2.26604e+07	97080	1.48674e+06	97080	4.06902e+06	53649	5.9976	53649	0.00291914	73080	2.15663e+06	56545	0.0182272	74460	304651	74460	4.46298e+06	62610	0.0075177	62610	0.0117448	95370	9.32384e+06	65927	2.2067	76770	2.44124e+06	59790	7.56995e-05	71236	0.109418	67403	12.7568	67403	6.0402	107040	1.92313e+07	57154	28.4448	98340
	50451	676275	93960	617974	93960	546243	93960	2.66531e+06	64156	2.28217e+07	97100	1.49571e+06	97100	4.08579e+06	53669	6.0859	53669	0.00298758	73100	2.16656e+06	56565	0.0185494	74480	305651	74480	4.4843e+06	62640	0.00767554	62640	0.0119754	95400	9.36034e+06	65957	2.24695	76800	2.4545e+06	59810	7.72031e-05	71256	0.11047	67423	12.8319	67423	6.08055	107060	1.92722e+07	57174	28.6747	98360
	50471	679771	93980	620314	93980	548178	93980	2.67532e+06	64176	2.29841e+07	97120	1.50472e+06	97120	4.10263e+06	53689	6.17541	53689	0.00305753	73120	2.17653e+06	56585	0.0188769	74500	306654	74500	4.50571e+06	62670	0.0078365	62670	0.0122103	95430	9.39696e+06	65987	2.28789	76830	2.46782e+06	59830	7.87352e-05	71276	0.111531	67443	12.9074	67443	6.12114	107080	1.93131e+07	57194	28.9063	98380
	50491	683283	94000	622663	94000	550120	94000	2.68536e+06	64196	2.31475e+07	97140	1.51378e+06	97140	4.11952e+06	53709	6.26615	53709	0.00312901	73140	2.18654e+06	56605	0.0192099	74520	307660	74520	4.52721e+06	62700	0.00800065	62700	0.0124495	95460	9.43371e+06	66017	2.32953	76860	2.48121e+06	59850	8.02961e-05	71296	0.112601	67463	12.9833	67463	6.16199	107100	1.93541e+07	57214	29.1397	98400
	50511	686810	94020	625019	94020	552067	94020	2.69544e+06	64216	2.3312e+07	97160	1.5229e+06	97160	4.13648e+06	53729	6.35812	53729	0.00320206	73160	2.19659e+06	56625	0.0195484	74540	308668	74540	4.54881e+06	62730	0.00816804	62730	0.0126931	95490	9.47058e+06	66047	2.37187	76890	2.49465e+06	59870	8.18863e-05	71316	0.113682	67483	13.0595	67483	6.20308	107120	1.93952e+07	57234	29.3747	98420
	50531	690354	94040	627383	94040	554021	94040	2.70555e+06	64236	2.34775e+07	97180	1.53206e+06	97180	4.1535e+06	53749	6.45134	53749	0.00327671	73180	2.20668e+06	56645	0.0198926	74560	309680	74560	4.5705e+06	62760	0.00833873	62760	0.0129413	95520	9.50757e+06	66077	2.41494	76920	2.50817e+06	59890	8.35065e-05	71336	0.114772	67503	13.1362	67503	6.24443	107140	1.94363e+07	57254	29.6116	98440
	50551	693913	94060	629756	94060	555980	94060	2.7157e+06	64256	2.36442e+07	97200	1.54128e+06	97200	4.17059e+06	53769	6.54583	53769	0.00335298	73200	2.21681e+06	56665	0.0202424	74580	310694	74580	4.59227e+06	62790	0.00851279	62790	0.0131939	95550	9.54469e+06	66107	2.45875	76950	2.52174e+06	59910	8.51572e-05	71356	0.115871	67523	13.2133	67523	6.28603	107160	1.94776e+07	57274	29.8501	98460
	50571	697487	94080	632136	94080	557946	94080	2.72587e+06	64276	2.38119e+07	97220	1.55054e+06	97220	4.18774e+06	53789	6.64161	53789	0.00343093	73220	2.22698e+06	56685	0.020598	74600	311711	74600	4.61415e+06	62820	0.00869028	62820	0.0134512	95580	9.58194e+06	66137	2.50329	76980	2.53538e+06	59930	8.68388e-05	71376	0.116981	67543	13.2908	67543	6.32788	107180	1.95189e+07	57294	30.0905	98480
	50591	701078	94100	634524	94100	559918	94100	2.73609e+06	64296	2.39806e+07	97240	1.55986e+06	97240	4.20495e+06	53809	6.73868	53809	0.00351057	73240	2.23719e+06	56705	0.0209595	74620	312731	74620	4.63611e+06	62850	0.00887125	62850	0.0137133	95610	9.6193e+06	66167	2.54859	77010	2.54908e+06	59950	8.8552e-05	71396	0.1181	67563	13.3688	67563	6.36999	107200	1.95602e+07	57314	30.3326	98500
	50611	704684	94120	636920	94120	561895	94120	2.74633e+06	64316	2.41505e+07	97260	1.56923e+06	97260	4.22222e+06	53829	6.83708	53829	0.00359194	73260	2.24744e+06	56725	0.021327	74640	313754	74640	4.65817e+06	62880	0.00905579	62880	0.0139801	95640	9.6568e+06	66197	2.59466	77040	2.56285e+06	59970	9.02972e-05	71416	0.11923	67583	13.4471	67583	6.41235	107220	1.96017e+07	57334	30.5765	98520
	50631	708307	94140	639324	94140	563880	94140	2.75661e+06	64336	2.43215e+07	97280	1.57866e+06	97280	4.23956e+06	53849	6.9368	53849	0.00367508	73280	2.25774e+06	56745	0.0217006	74660	314779	74660	4.68032e+06	62910	0.00924394	62910	0.0142519	95670	9.69442e+06	66227	2.64151	77070	2.57668e+06	59990	9.20751e-05	71436	0.12037	67603	13.5258	67603	6.45498	107240	1.96432e+07	57354	30.8222	98540
	50651	711945	94160	641737	94160	565870	94160	2.76693e+06	64356	2.44935e+07	97300	1.58813e+06	97300	4.25696e+06	53869	7.03788	53869	0.00376002	73300	2.26807e+06	56765	0.0220803	74680	315808	74680	4.70256e+06	62940	0.00943578	62940	0.0145286	95700	9.73217e+06	66257	2.68916	77100	2.59058e+06	60010	9.38863e-05	71456	0.12152	67623	13.605	67623	6.49786	107260	1.96848e+07	57374	31.0697	98560
	50671	715600	94180	644157	94180	567866	94180	2.77728e+06	64376	2.46667e+07	97320	1.59766e+06	97320	4.27443e+06	53889	7.14033	53889	0.00384681	73320	2.27845e+06	56785	0.0224663	74700	316839	74700	4.7249e+06	62970	0.00963137	62970	0.0148103	95730	9.77004e+06	66287	2.7376	77130	2.60454e+06	60030	9.57313e-05	71476	0.12268	67643	13.6846	67643	6.54101	107280	1.97265e+07	57394	31.3191	98580
	50691	719270	94200	646585	94200	569869	94200	2.78766e+06	64396	2.4841e+07	97340	1.60724e+06	97340	4.29196e+06	53909	7.24415	53909	0.00393547	73340	2.28887e+06	56805	0.0228586	74720	317873	74720	4.74734e+06	63000	0.00983079	63000	0.0150972	95760	9.80804e+06	66317	2.78687	77160	2.61857e+06	60050	9.76107e-05	71496	0.123851	67663	13.7646	67663	6.58442	107300	1.97682e+07	57414	31.5703	98600
	50711	722957	94220	649022	94220	571878	94220	2.79808e+06	64416	2.50164e+07	97360	1.61687e+06	97360	4.30956e+06	53929	7.34938	53929	0.00402605	73360	2.29933e+06	56825	0.0232574	74740	318910	74740	4.76987e+06	63030	0.0100341	63030	0.0153894	95790	9.84617e+06	66347	2.83697	77190	2.63266e+06	60070	9.95252e-05	71516	0.125032	67683	13.8451	67683	6.62809	107320	1.981e+07	57434	31.8233	98620
	50731	726660	94240	651467	94240	573893	94240	2.80853e+06	64436	2.51929e+07	97380	1.62655e+06	97380	4.32722e+06	53949	7.45603	53949	0.00411858	73380	2.30983e+06	56845	0.0236628	74760	319950	74760	4.79249e+06	63060	0.0102414	63060	0.0156868	95820	9.88443e+06	66377	2.88791	77220	2.64682e+06	60090	0.000101475	71536	0.126224	67703	13.9259	67703	6.67203	107340	1.98519e+07	57454	32.0782	98640
	50751	730379	94260	653920	94260	575914	94260	2.81902e+06	64456	2.53705e+07	97400	1.63629e+06	97400	4.34495e+06	53969	7.56411	53969	0.0042131	73400	2.32038e+06	56865	0.0240747	74780	320993	74780	4.81521e+06	63090	0.0104527	63090	0.0159897	95850	9.92281e+06	66407	2.9397	77250	2.66105e+06	60110	0.000103462	71556	0.127426	67723	14.0072	67723	6.71623	107360	1.98939e+07	57474	32.3349	98660
	50771	734115	94280	656381	94280	577942	94280	2.82954e+06	64476	2.55493e+07	97420	1.64609e+06	97420	4.36274e+06	53989	7.67365	53989	0.00430966	73420	2.33097e+06	56885	0.0244935	74800	322038	74800	4.83803e+06	63120	0.0106681	63120	0.0162981	95880	9.96133e+06	66437	2.99237	77280	2.67534e+06	60130	0.000105485	71576	0.128639	67743	14.089	67743	6.76071	107380	1.9936e+07	57494	32.5936	98680
	50791	737867	94300	658850	94300	579976	94300	2.84009e+06	64496	2.57293e+07	97440	1.65594e+06	97440	4.38059e+06	54009	7.78466	54009	0.00440829	73440	2.3416e+06	56905	0.0249191	74820	323087	74820	4.86094e+06	63150	0.0108878	63150	0.016612	95910	9.99997e+06	66467	3.04592	77310	2.68969e+06	60150	0.000107546	71596	0.129863	67763	14.1711	67763	6.80545	107400	1.99781e+07	57514	32.8542	98700
	50811	741635	94320	661327	94320	582016	94320	2.85068e+06	64516	2.59104e+07	97460	1.66584e+06	97460	4.39852e+06	54029	7.89716	54029	0.00450903	73460	2.35227e+06	56925	0.0253517	74840	324138	74840	4.88395e+06	63180	0.0111116	63180	0.0169317	95940	1.00387e+07	66497	3.10037	77340	2.70412e+06	60170	0.000109645	71616	0.131098	67783	14.2537	67783	6.85047	107420	2.00203e+07	57534	33.1166	98720
	50831	745420	94340	663813	94340	584063	94340	2.86131e+06	64536	2.60927e+07	97480	1.67579e+06	97480	4.41651e+06	54049	8.01117	54049	0.00461193	73480	2.36298e+06	56945	0.0257913	74860	325193	74860	4.90706e+06	63210	0.0113399	63210	0.0172571	95970	1.00776e+07	66527	3.15573	77370	2.71861e+06	60190	0.000111783	71636	0.132344	67803	14.3368	67803	6.89576	107440	2.00626e+07	57554	33.381	98740
	50851	749222	94360	666307	94360	586116	94360	2.87197e+06	64556	2.62761e+07	97500	1.68581e+06	97500	4.43456e+06	54069	8.1267	54069	0.00471704	73500	2.37374e+06	56965	0.0262381	74880	326250	74880	4.93026e+06	63240	0.0115725	63240	0.0175885	96000	1.01167e+07	66557	3.21202	77400	2.73317e+06	60210	0.000113961	71656	0.133601	67823	14.4203	67823	6.94132	107460	2.01049e+07	57574	33.6473	98760
	50871	753040	94380	668810	94380	588175	94380	2.88267e+06	64576	2.64607e+07	97520	1.69587e+06	97520	4.45268e+06	54089	8.24379	54089	0.00482439	73520	2.38454e+06	56985	0.0266922	74900	327310	74900	4.95356e+06	63270	0.0118097	63270	0.0179258	96030	1.01558e+07	66587	3.26925	77430	2.7478e+06	60230	0.000116179	71676	0.13487	67843	14.5042	67843	6.98716	107480	2.01473e+07	57594	33.9156	98780
	50891	756875	94400	671320	94400	590240	94400	2.8934e+06	64596	2.66465e+07	97540	1.706e+06	97540	4.47087e+06	54109	8.36243	54109	0.00493403	73540	2.39539e+06	57005	0.0271537	74920	328374	74920	4.97696e+06	63300	0.0120514	63300	0.0182692	96060	1.01951e+07	66617	3.32743	77460	2.76249e+06	60250	0.000118438	71696	0.136149	67863	14.5885	67863	7.03328	107500	2.01898e+07	57614	34.1859	98800
	50911	760727	94420	673839	94420	592312	94420	2.90417e+06	64616	2.68334e+07	97560	1.71617e+06	97560	4.48913e+06	54129	8.48267	54129	0.005046	73560	2.40627e+06	57025	0.0276228	74940	329440	74940	5.00046e+06	63330	0.0122978	63330	0.0186188	96090	1.02346e+07	66647	3.38658	77490	2.77725e+06	60270	0.000120738	71716	0.13744	67883	14.6733	67883	7.07967	107520	2.02324e+07	57634	34.4581	98820
	50931	764596	94440	676367	94440	594391	94440	2.91497e+06	64636	2.70216e+07	97580	1.72641e+06	97580	4.50745e+06	54149	8.6045	54149	0.00516036	73580	2.41721e+06	57045	0.0280994	74960	330509	74960	5.02406e+06	63360	0.0125489	63360	0.0189747	96120	1.02741e+07	66677	3.44672	77520	2.79208e+06	60290	0.000123081	71736	0.138743	67903	14.7586	67903	7.12635	107540	2.02751e+07	57654	34.7323	98840
	50951	768481	94460	678903	94460	596476	94460	2.92581e+06	64656	2.72109e+07	97600	1.7367e+06	97600	4.52584e+06	54169	8.72796	54169	0.00527714	73600	2.42818e+06	57065	0.0285838	74980	331581	74980	5.04775e+06	63390	0.0128049	63390	0.019337	96150	1.03138e+07	66707	3.50785	77550	2.80698e+06	60310	0.000125467	71756	0.140057	67923	14.8443	67923	7.17331	107560	2.03178e+07	57674	35.0085	98860
	50971	772384	94480	681447	94480	598567	94480	2.93668e+06	64676	2.74015e+07	97620	1.74705e+06	97620	4.5443e+06	54189	8.85306	54189	0.0053964	73620	2.4392e+06	57085	0.0290761	75000	332656	75000	5.07155e+06	63420	0.0130658	63420	0.0197058	96180	1.03536e+07	66737	3.57001	77580	2.82195e+06	60330	0.000127897	71776	0.141382	67943	14.9305	67943	7.22055	107580	2.03606e+07	57694	35.2868	98880
	50991	776303	94500	684000	94500	600665	94500	2.94759e+06	64696	2.75933e+07	97640	1.75745e+06	97640	4.56282e+06	54209	8.97983	54209	0.00551819	73640	2.45026e+06	57105	0.0295763	75020	333734	75020	5.09544e+06	63450	0.0133318	63450	0.0200813	96210	1.03936e+07	66767	3.63319	77610	2.83699e+06	60350	0.000130372	71796	0.14272	67963	15.0171	67963	7.26808	107600	2.04035e+07	57714	35.567	98900
	51011	780240	94520	686561	94520	602769	94520	2.95854e+06	64716	2.77863e+07	97660	1.76791e+06	97660	4.58141e+06	54229	9.10828	54229	0.00564255	73660	2.46137e+06	57125	0.0300846	75040	334814	75040	5.11944e+06	63480	0.0136028	63480	0.0204634	96240	1.04336e+07	66797	3.69742	77640	2.8521e+06	60370	0.000132893	71816	0.144069	67983	15.1041	67983	7.31589	107620	2.04465e+07	57734	35.8493	98920
	51031	784194	94540	689131	94540	604880	94540	2.96952e+06	64736	2.79805e+07	97680	1.77843e+06	97680	4.60007e+06	54249	9.23844	54249	0.00576954	73680	2.47252e+06	57145	0.0306012	75060	335898	75060	5.14354e+06	63510	0.013879	63510	0.0208524	96270	1.04739e+07	66827	3.76272	77670	2.86727e+06	60390	0.000135459	71836	0.14543	68003	15.1917	68003	7.364	107640	2.04895e+07	57754	36.1337	98940
	51051	788165	94560	691709	94560	606997	94560	2.98054e+06	64756	2.8176e+07	97700	1.78901e+06	97700	4.6188e+06	54269	9.37032	54269	0.0058992	73700	2.48371e+06	57165	0.0311261	75080	336985	75080	5.16774e+06	63540	0.0141605	63540	0.0212484	96300	1.05142e+07	66857	3.82909	77700	2.88252e+06	60410	0.000138073	71856	0.146804	68023	15.2797	68023	7.41239	107660	2.05326e+07	57774	36.4201	98960
	51071	792153	94580	694296	94580	609121	94580	2.9916e+06	64776	2.83727e+07	97720	1.79965e+06	97720	4.6376e+06	54289	9.50394	54289	0.0060316	73720	2.49495e+06	57185	0.0316595	75100	338075	75100	5.19204e+06	63570	0.0144474	63570	0.0216514	96330	1.05547e+07	66887	3.89656	77730	2.89784e+06	60430	0.000140734	71876	0.148189	68043	15.3681	68043	7.46108	107680	2.05758e+07	57794	36.7086	98980
	51091	796159	94600	696891	94600	611251	94600	3.00269e+06	64796	2.85706e+07	97740	1.81034e+06	97740	4.65647e+06	54309	9.63934	54309	0.00616678	73740	2.50624e+06	57205	0.0322015	75120	339168	75120	5.21644e+06	63600	0.0147398	63600	0.0220617	96360	1.05953e+07	66917	3.96515	77760	2.91322e+06	60450	0.000143444	71896	0.149587	68063	15.457	68063	7.51005	107700	2.06191e+07	57814	36.9993	99000
	51111	800181	94620	699495	94620	613388	94620	3.01381e+06	64816	2.87699e+07	97760	1.82109e+06	97760	4.6754e+06	54329	9.77652	54329	0.00630481	73760	2.51757e+06	57225	0.0327523	75140	340264	75140	5.24094e+06	63630	0.0150378	63630	0.0224792	96390	1.06361e+07	66947	4.03486	77790	2.92868e+06	60470	0.000146204	71916	0.150997	68083	15.5464	68083	7.55933	107720	2.06625e+07	57834	37.292	99020
	51131	804222	94640	702108	94640	615531	94640	3.02498e+06	64836	2.89703e+07	97780	1.8319e+06	97780	4.69441e+06	54349	9.91552	54349	0.00644572	73780	2.52894e+06	57245	0.0333119	75160	341363	75160	5.26555e+06	63660	0.0153414	63660	0.0229042	96420	1.0677e+07	66977	4.10573	77820	2.94421e+06	60490	0.000149014	71936	0.15242	68103	15.6363	68103	7.6089	107740	2.07059e+07	57854	37.5868	99040
	51151	808280	94660	704729	94660	617681	94660	3.03618e+06	64856	2.91721e+07	97800	1.84277e+06	97800	4.71348e+06	54369	10.0564	54369	0.00658959	73800	2.54036e+06	57265	0.0338805	75180	342465	75180	5.29026e+06	63690	0.0156508	63690	0.0233367	96450	1.0718e+07	67007	4.17776	77850	2.95981e+06	60510	0.000151876	71956	0.153855	68123	15.7266	68123	7.65876	107760	2.07494e+07	57874	37.8838	99060
	51171	812355	94680	707359	94680	619838	94680	3.04742e+06	64876	2.93751e+07	97820	1.8537e+06	97820	4.73263e+06	54389	10.199	54389	0.00673647	73820	2.55182e+06	57285	0.0344582	75200	343569	75200	5.31507e+06	63720	0.0159661	63720	0.0237769	96480	1.07592e+07	67037	4.25097	77880	2.97549e+06	60530	0.000154789	71976	0.155303	68143	15.8174	68143	7.70893	107780	2.0793e+07	57894	38.183	99080
	51191	816448	94700	709998	94700	622001	94700	3.05869e+06	64896	2.95794e+07	97840	1.86469e+06	97840	4.75184e+06	54409	10.3436	54409	0.00688641	73840	2.56333e+06	57305	0.0350453	75220	344677	75220	5.33998e+06	63750	0.0162874	63750	0.024225	96510	1.08005e+07	67067	4.32538	77910	2.99123e+06	60550	0.000157756	71996	0.156763	68163	15.9086	68163	7.7594	107800	2.08366e+07	57914	38.4843	99100
	51211	820559	94720	712645	94720	624171	94720	3.07e+06	64916	2.9785e+07	97860	1.87574e+06	97860	4.77113e+06	54429	10.4901	54429	0.00703948	73860	2.57489e+06	57325	0.0356417	75240	345788	75240	5.365e+06	63780	0.0166148	63780	0.024681	96540	1.08419e+07	67097	4.40101	77940	3.00705e+06	60570	0.000160777	72016	0.158237	68183	16.0004	68183	7.81017	107820	2.08804e+07	57934	38.7878	99120
	51231	824688	94740	715301	94740	626348	94740	3.08135e+06	64936	2.99919e+07	97880	1.88685e+06	97880	4.79048e+06	54449	10.6385	54449	0.00719574	73880	2.58649e+06	57345	0.0362477	75260	346902	75260	5.39013e+06	63810	0.0169484	63810	0.025145	96570	1.08835e+07	67127	4.47789	77970	3.02294e+06	60590	0.000163852	72036	0.159723	68203	16.0926	68203	7.86125	107840	2.09242e+07	57954	39.0935	99140
	51251	828834	94760	717966	94760	628531	94760	3.09274e+06	64956	3.02001e+07	97900	1.89802e+06	97900	4.80991e+06	54469	10.7888	54469	0.00735525	73900	2.59814e+06	57365	0.0368634	75280	348019	75280	5.41536e+06	63840	0.0172883	63840	0.0256173	96600	1.09252e+07	67157	4.55602	78000	3.0389e+06	60610	0.000166984	72056	0.161223	68223	16.1853	68223	7.91263	107860	2.09681e+07	57974	39.4014	99160
	51271	832999	94780	720640	94780	630721	94780	3.10416e+06	64976	3.04096e+07	97920	1.90926e+06	97920	4.8294e+06	54489	10.9411	54489	0.00751808	73920	2.60983e+06	57385	0.037489	75300	349140	75300	5.44069e+06	63870	0.0176346	63870	0.0260979	96630	1.0967e+07	67187	4.63542	78030	3.05493e+06	60630	0.000170172	72076	0.162736	68243	16.2786	68243	7.96432	107880	2.1012e+07	57994	39.7115	99180
	51291	837181	94800	723323	94800	632917	94800	3.11562e+06	64996	3.06205e+07	97940	1.92055e+06	97940	4.84897e+06	54509	11.0954	54509	0.00768428	73940	2.62157e+06	57405	0.0381245	75320	350263	75320	5.46613e+06	63900	0.0179875	63900	0.026587	96660	1.1009e+07	67217	4.71612	78060	3.07104e+06	60650	0.000173418	72096	0.164262	68263	16.3722	68263	8.01632	107900	2.10561e+07	58014	40.0239	99200
	51311	841381	94820	726014	94820	635121	94820	3.12712e+06	65016	3.08326e+07	97960	1.93191e+06	97960	4.86861e+06	54529	11.2517	54529	0.00785393	73960	2.63336e+06	57425	0.0387702	75340	351389	75340	5.49168e+06	63930	0.018347	63930	0.0270847	96690	1.10511e+07	67247	4.79814	78090	3.08722e+06	60670	0.000176723	72116	0.165801	68283	16.4664	68283	8.06863	107920	2.11002e+07	58034	40.3385	99220
	51331	845600	94840	728714	94840	637331	94840	3.13865e+06	65036	3.10462e+07	97980	1.94332e+06	97980	4.88832e+06	54549	11.4101	54549	0.00802708	73980	2.64519e+06	57445	0.0394262	75360	352518	75360	5.51733e+06	63960	0.0187133	63960	0.0275912	96720	1.10934e+07	67277	4.88149	78120	3.10348e+06	60690	0.000180087	72136	0.167354	68303	16.5611	68303	8.12125	107940	2.11444e+07	58054	40.6554	99240
	51351	849836	94860	731424	94860	639548	94860	3.15023e+06	65056	3.1261e+07	98000	1.9548e+06	98000	4.9081e+06	54569	11.5705	54569	0.00820381	74000	2.65707e+06	57465	0.0400926	75380	353651	75380	5.54309e+06	63990	0.0190865	63990	0.0281066	96750	1.11358e+07	67307	4.9662	78150	3.11981e+06	60710	0.000183513	72156	0.168921	68323	16.6562	68323	8.17419	107960	2.11887e+07	58074	40.9746	99260
	51371	854091	94880	734142	94880	641772	94880	3.16184e+06	65076	3.14772e+07	98020	1.96635e+06	98020	4.92795e+06	54589	11.733	54589	0.00838419	74020	2.66899e+06	57485	0.0407696	75400	354786	75400	5.56896e+06	64020	0.0194667	64020	0.028631	96780	1.11783e+07	67337	5.05228	78180	3.13621e+06	60730	0.000187	72176	0.170502	68343	16.7519	68343	8.22745	107980	2.12331e+07	58094	41.2961	99280
	51391	858364	94900	736869	94900	644002	94900	3.17349e+06	65096	3.16948e+07	98040	1.97795e+06	98040	4.94788e+06	54609	11.8977	54609	0.00856828	74040	2.68097e+06	57505	0.0414574	75420	355925	75420	5.59493e+06	64050	0.0198541	64050	0.0291646	96810	1.1221e+07	67367	5.13976	78210	3.15269e+06	60750	0.00019055	72196	0.172096	68363	16.8481	68363	8.28102	108000	2.12775e+07	58114	41.6199	99300
	51411	862655	94920	739605	94920	646240	94920	3.18518e+06	65116	3.19137e+07	98060	1.98962e+06	98060	4.96788e+06	54629	12.0644	54629	0.00875616	74060	2.69299e+06	57525	0.0421561	75440	357067	75440	5.62102e+06	64080	0.0202487	64080	0.0297076	96840	1.12638e+07	67397	5.22866	78240	3.16925e+06	60770	0.000194164	72216	0.173704	68383	16.9447	68383	8.33491	108020	2.13221e+07	58134	41.946	99320
	51431	866965	94940	742350	94940	648484	94940	3.1969e+06	65136	3.2134e+07	98080	2.00135e+06	98080	4.98795e+06	54649	12.2334	54649	0.0089479	74080	2.70505e+06	57545	0.0428659	75460	358212	75460	5.64721e+06	64110	0.0206507	64110	0.0302602	96870	1.13068e+07	67427	5.319	78270	3.18588e+06	60790	0.000197844	72236	0.175327	68403	17.0419	68403	8.38913	108040	2.13667e+07	58154	42.2745	99340
	51451	871293	94960	745104	94960	650735	94960	3.20866e+06	65156	3.23557e+07	98100	2.01315e+06	98100	5.0081e+06	54669	12.4045	54669	0.00914358	74100	2.71717e+06	57565	0.043587	75480	359360	75480	5.67351e+06	64140	0.0210603	64140	0.0308223	96900	1.13499e+07	67457	5.4108	78300	3.20258e+06	60810	0.000201589	72256	0.176963	68423	17.1396	68423	8.44366	108060	2.14113e+07	58174	42.6053	99360
	51471	875640	94980	747867	94980	652993	94980	3.22047e+06	65176	3.25788e+07	98120	2.02501e+06	98120	5.02831e+06	54689	12.5779	54689	0.00934326	74120	2.72933e+06	57585	0.0443194	75500	360511	75500	5.69991e+06	64170	0.0214775	64170	0.0313944	96930	1.13931e+07	67487	5.50409	78330	3.21936e+06	60830	0.000205402	72276	0.178614	68443	17.2377	68443	8.49853	108080	2.14561e+07	58194	42.9385	99380
	51491	880006	95000	750639	95000	655257	95000	3.23231e+06	65196	3.28033e+07	98140	2.03693e+06	98140	5.0486e+06	54709	12.7535	54709	0.00954703	74140	2.74154e+06	57605	0.0450635	75520	361665	75520	5.72643e+06	64200	0.0219025	64200	0.0319763	96960	1.14365e+07	67517	5.59887	78360	3.23622e+06	60850	0.000209283	72296	0.18028	68463	17.3364	68463	8.55372	108100	2.1501e+07	58214	43.2741	99400
	51511	884390	95020	753421	95020	657529	95020	3.24419e+06	65216	3.30291e+07	98160	2.04892e+06	98160	5.06897e+06	54729	12.9314	54729	0.00975497	74160	2.7538e+06	57625	0.0458193	75540	362822	75540	5.75306e+06	64230	0.0223354	64230	0.0325685	96990	1.14801e+07	67547	5.69519	78390	3.25315e+06	60870	0.000213234	72316	0.18196	68483	17.4356	68483	8.60923	108120	2.15459e+07	58234	43.6121	99420
	51531	888793	95040	756211	95040	659808	95040	3.2561e+06	65236	3.32564e+07	98180	2.06098e+06	98180	5.08941e+06	54749	13.1116	54749	0.00996715	74180	2.76611e+06	57645	0.0465871	75560	363983	75560	5.7798e+06	64260	0.0227764	64260	0.0331709	97020	1.15237e+07	67577	5.79306	78420	3.27016e+06	60890	0.000217256	72336	0.183654	68503	17.5354	68503	8.66508	108140	2.15909e+07	58254	43.9525	99440
	51551	893214	95060	759011	95060	662093	95060	3.26806e+06	65256	3.34851e+07	98200	2.0731e+06	98200	5.10992e+06	54769	13.2941	54769	0.0101836	74200	2.77846e+06	57665	0.0473669	75580	365146	75580	5.80665e+06	64290	0.0232256	64290	0.0337839	97050	1.15675e+07	67607	5.8925	78450	3.28725e+06	60910	0.000221349	72356	0.185364	68523	17.6356	68523	8.72126	108160	2.1636e+07	58274	44.2954	99460
	51571	897655	95080	761820	95080	664386	95080	3.28006e+06	65276	3.37153e+07	98220	2.08528e+06	98220	5.13051e+06	54789	13.479	54789	0.0104046	74220	2.79086e+06	57685	0.0481591	75600	366313	75600	5.83361e+06	64320	0.0236831	64320	0.0344075	97080	1.16115e+07	67637	5.99354	78480	3.30441e+06	60930	0.000225516	72376	0.187088	68543	17.7363	68543	8.77778	108180	2.16811e+07	58294	44.6407	99480
	51591	902114	95100	764638	95100	666686	95100	3.29209e+06	65296	3.39469e+07	98240	2.09754e+06	98240	5.15117e+06	54809	13.6662	54809	0.01063	74240	2.80331e+06	57705	0.0489637	75620	367483	75620	5.86068e+06	64350	0.0241491	64350	0.0350419	97110	1.16556e+07	67667	6.0962	78510	3.32166e+06	60950	0.000229757	72396	0.188828	68563	17.8376	68563	8.83463	108200	2.17264e+07	58314	44.9885	99500
	51611	906593	95120	767465	95120	668992	95120	3.30416e+06	65316	3.41799e+07	98260	2.10986e+06	98260	5.17191e+06	54829	13.8559	54829	0.0108599	74260	2.81582e+06	57725	0.0497809	75640	368656	75640	5.88786e+06	64380	0.0246238	64380	0.0356873	97140	1.16998e+07	67697	6.20051	78540	3.33898e+06	60970	0.000234074	72416	0.190582	68583	17.9394	68583	8.89181	108220	2.17717e+07	58334	45.3388	99520
	51631	911090	95140	770302	95140	671306	95140	3.31628e+06	65336	3.44144e+07	98280	2.12224e+06	98280	5.19272e+06	54849	14.048	54849	0.0110946	74280	2.82836e+06	57745	0.050611	75660	369833	75660	5.91515e+06	64410	0.0251073	64410	0.0363439	97170	1.17442e+07	67727	6.30649	78570	3.35638e+06	60990	0.000238468	72436	0.192352	68603	18.0418	68603	8.94934	108240	2.18171e+07	58354	45.6916	99540
	51651	915607	95160	773147	95160	673626	95160	3.32843e+06	65356	3.46504e+07	98300	2.13469e+06	98300	5.2136e+06	54869	14.2426	54869	0.011334	74300	2.84096e+06	57765	0.0514542	75680	371012	75680	5.94256e+06	64440	0.0255997	64440	0.0370118	97200	1.17888e+07	67757	6.41417	78600	3.37385e+06	61010	0.000242941	72456	0.194137	68623	18.1446	68623	9.00721	108260	2.18626e+07	58374	46.0469	99560
	51671	920143	95180	776003	95180	675954	95180	3.34062e+06	65376	3.48878e+07	98320	2.14721e+06	98320	5.23457e+06	54889	14.4396	54889	0.0115782	74320	2.85361e+06	57785	0.0523105	75700	372195	75700	5.97008e+06	64470	0.0261012	64470	0.0376913	97230	1.18335e+07	67787	6.52356	78630	3.39141e+06	61030	0.000247493	72476	0.195938	68643	18.248	68643	9.06542	108280	2.19081e+07	58394	46.4047	99580
	51691	924698	95200	778867	95200	678289	95200	3.35285e+06	65396	3.51267e+07	98340	2.1598e+06	98340	5.2556e+06	54909	14.6393	54909	0.0118273	74340	2.86631e+06	57805	0.0531803	75720	373381	75720	5.99772e+06	64500	0.026612	64500	0.0383826	97260	1.18783e+07	67817	6.6347	78660	3.40904e+06	61050	0.000252126	72496	0.197755	68663	18.3519	68663	9.12397	108300	2.19538e+07	58414	46.7651	99600
	51711	929272	95220	781741	95220	680631	95220	3.36512e+06	65416	3.53671e+07	98360	2.17246e+06	98360	5.27672e+06	54929	14.8414	54929	0.0120815	74360	2.87905e+06	57825	0.0540637	75740	374570	75740	6.02547e+06	64530	0.0271322	64530	0.0390857	97290	1.19233e+07	67847	6.74761	78690	3.42676e+06	61070	0.000256841	72516	0.199587	68683	18.4564	68683	9.18287	108320	2.19995e+07	58434	47.128	99620
	51731	933866	95240	784624	95240	682980	95240	3.37743e+06	65436	3.56089e+07	98380	2.18518e+06	98380	5.29791e+06	54949	15.0462	54949	0.0123408	74380	2.89185e+06	57845	0.0549609	75760	375762	75760	6.05333e+06	64560	0.027662	64560	0.039801	97320	1.19684e+07	67877	6.86233	78720	3.44455e+06	61090	0.00026164	72536	0.201435	68703	18.5614	68703	9.24212	108340	2.20453e+07	58454	47.4936	99640
	51751	938480	95260	787517	95260	685336	95260	3.38978e+06	65456	3.58523e+07	98400	2.19797e+06	98400	5.31918e+06	54969	15.2535	54969	0.0126053	74400	2.9047e+06	57865	0.0558721	75780	376958	75780	6.08131e+06	64590	0.0282016	64590	0.0405286	97350	1.20136e+07	67907	6.97886	78750	3.46242e+06	61110	0.000266524	72556	0.203299	68723	18.6669	68723	9.30172	108360	2.20912e+07	58474	47.8617	99660
	51771	943113	95280	790419	95280	687699	95280	3.40217e+06	65476	3.60972e+07	98420	2.21084e+06	98420	5.34052e+06	54989	15.4636	54989	0.0128751	74420	2.91759e+06	57885	0.0567975	75800	378157	75800	6.1094e+06	64620	0.028751	64620	0.0412687	97380	1.20591e+07	67937	7.09725	78780	3.48038e+06	61130	0.000271494	72576	0.20518	68743	18.773	68743	9.36168	108380	2.21372e+07	58494	48.2324	99680
	51791	947765	95300	793331	95300	690070	95300	3.41461e+06	65496	3.63436e+07	98440	2.22377e+06	98440	5.36194e+06	55009	15.6763	55009	0.0131504	74440	2.93054e+06	57905	0.0577374	75820	379359	75820	6.13761e+06	64650	0.0293106	64650	0.0420215	97410	1.21046e+07	67967	7.21752	78810	3.49841e+06	61150	0.000276553	72596	0.207076	68763	18.8797	68763	9.42198	108400	2.21832e+07	58514	48.6058	99700
	51811	952437	95320	796252	95320	692447	95320	3.42708e+06	65516	3.65916e+07	98460	2.23677e+06	98460	5.38344e+06	55029	15.8917	55029	0.0134311	74460	2.94354e+06	57925	0.0586919	75840	380564	75840	6.16593e+06	64680	0.0298804	64680	0.0427872	97440	1.21503e+07	67997	7.3397	78840	3.51653e+06	61170	0.000281701	72616	0.20899	68783	18.9869	68783	9.48265	108420	2.22293e+07	58534	48.9819	99720
	51831	957129	95340	799183	95340	694832	95340	3.43959e+06	65536	3.68411e+07	98480	2.24984e+06	98480	5.40501e+06	55049	16.1098	55049	0.0137175	74480	2.95658e+06	57945	0.0596612	75860	381773	75860	6.19437e+06	64710	0.0304606	64710	0.043566	97470	1.21962e+07	68027	7.46381	78870	3.53472e+06	61190	0.00028694	72636	0.210919	68803	19.0946	68803	9.54367	108440	2.22755e+07	58554	49.3606	99740
	51851	961841	95360	802123	95360	697224	95360	3.45214e+06	65556	3.70921e+07	98500	2.26298e+06	98500	5.42667e+06	55069	16.3308	55069	0.0140096	74500	2.96968e+06	57965	0.0606456	75880	382985	75880	6.22293e+06	64740	0.0310515	64740	0.0443582	97500	1.22422e+07	68057	7.58988	78900	3.553e+06	61210	0.000292272	72656	0.212866	68823	19.2029	68823	9.60505	108460	2.23218e+07	58574	49.742	99760
	51871	966573	95380	805073	95380	699623	95380	3.46473e+06	65576	3.73447e+07	98520	2.2762e+06	98520	5.4484e+06	55089	16.5545	55089	0.0143075	74520	2.98283e+06	57985	0.0616453	75900	384200	75900	6.25161e+06	64770	0.0316532	64770	0.0451639	97530	1.22884e+07	68087	7.71795	78930	3.57136e+06	61230	0.000297697	72676	0.214829	68843	19.3118	68843	9.66679	108480	2.23682e+07	58594	50.1261	99780
	51891	971324	95400	808032	95400	702030	95400	3.47737e+06	65596	3.75988e+07	98540	2.28948e+06	98540	5.47021e+06	55109	16.7811	55109	0.0146113	74540	2.99603e+06	58005	0.0626605	75920	385418	75920	6.2804e+06	64800	0.0322658	64800	0.0459834	97560	1.23347e+07	68117	7.84804	78960	3.58981e+06	61250	0.000303218	72696	0.216809	68863	19.4212	68863	9.7289	108500	2.24147e+07	58614	50.5129	99800
	51911	976096	95420	811001	95420	704444	95420	3.49004e+06	65616	3.78545e+07	98560	2.30284e+06	98560	5.4921e+06	55129	17.0106	55129	0.0149212	74560	3.00928e+06	58025	0.0636915	75940	386640	75940	6.30931e+06	64830	0.0328897	64830	0.0468168	97590	1.23811e+07	68147	7.98019	78990	3.60833e+06	61270	0.000308837	72716	0.218807	68883	19.5312	68883	9.79137	108520	2.24612e+07	58634	50.9024	99820
	51931	980887	95440	813980	95440	706865	95440	3.50276e+06	65636	3.81118e+07	98580	2.31627e+06	98580	5.51406e+06	55149	17.2429	55149	0.0152372	74580	3.02258e+06	58045	0.0647384	75960	387865	75960	6.33834e+06	64860	0.0335249	64860	0.0476645	97620	1.24277e+07	68177	8.11441	79020	3.62694e+06	61290	0.000314554	72736	0.220821	68903	19.6417	68903	9.85421	108540	2.25078e+07	58654	51.2947	99840
	51951	985699	95460	816968	95460	709293	95460	3.51551e+06	65656	3.83707e+07	98600	2.32977e+06	98600	5.53611e+06	55169	17.4783	55169	0.0155596	74600	3.03594e+06	58065	0.0658015	75980	389093	75980	6.36749e+06	64890	0.0341716	64890	0.0485265	97650	1.24745e+07	68207	8.25075	79050	3.64563e+06	61310	0.000320371	72756	0.222853	68923	19.7528	68923	9.91742	108560	2.25545e+07	58674	51.6898	99860
	51971	990531	95480	819966	95480	711729	95480	3.52831e+06	65676	3.86312e+07	98620	2.34334e+06	98620	5.55823e+06	55189	17.7166	55189	0.0158883	74620	3.04934e+06	58085	0.066881	76000	390325	76000	6.39675e+06	64920	0.0348301	64920	0.0494033	97680	1.25214e+07	68237	8.38923	79080	3.6644e+06	61330	0.000326291	72776	0.224903	68943	19.8645	68943	9.981	108580	2.26013e+07	58694	52.0877	99880
	51991	995384	95500	822974	95500	714172	95500	3.54115e+06	65696	3.88933e+07	98640	2.35699e+06	98640	5.58044e+06	55209	17.9579	55209	0.0162235	74640	3.0628e+06	58105	0.0679772	76020	391559	76020	6.42614e+06	64950	0.0355006	64950	0.0502949	97710	1.25685e+07	68267	8.52989	79110	3.68326e+06	61350	0.000332314	72796	0.22697	68963	19.9767	68963	10.045	108600	2.26482e+07	58714	52.4884	99900
	52011	1.00026e+06	95520	825992	95520	716623	95520	3.55403e+06	65716	3.9157e+07	98660	2.3707e+06	98660	5.60272e+06	55229	18.2022	55229	0.0165653	74660	3.07631e+06	58125	0.0690903	76040	392798	76040	6.45565e+06	64980	0.0361832	64980	0.0512017	97740	1.26157e+07	68297	8.67275	79140	3.7022e+06	61370	0.000338443	72816	0.229055	68983	20.0896	68983	10.1093	108620	2.26951e+07	58734	52.8919	99920
	52031	1.00515e+06	95540	829019	95540	719081	95540	3.56695e+06	65736	3.94223e+07	98680	2.3845e+06	98680	5.62509e+06	55249	18.4496	55249	0.0169139	74680	3.08988e+06	58145	0.0702205	76060	394039	76060	6.48527e+06	65010	0.0368782	65010	0.0521238	97770	1.26631e+07	68327	8.81785	79170	3.72122e+06	61390	0.00034468	72836	0.231158	69003	20.203	69003	10.174	108640	2.27422e+07	58754	53.2982	99940
	52051	1.01006e+06	95560	832057	95560	721546	95560	3.57991e+06	65756	3.96893e+07	98700	2.39836e+06	98700	5.64753e+06	55269	18.7002	55269	0.0172693	74700	3.10349e+06	58165	0.0713682	76080	395284	76080	6.51502e+06	65040	0.0375858	65040	0.0530616	97800	1.27106e+07	68357	8.96522	79200	3.74033e+06	61410	0.000351025	72856	0.233279	69023	20.317	69023	10.2391	108660	2.27893e+07	58774	53.7075	99960
	52071	1.015e+06	95580	835104	95580	724019	95580	3.59292e+06	65776	3.99579e+07	98720	2.41231e+06	98720	5.67006e+06	55289	18.9539	55289	0.0176318	74720	3.11716e+06	58185	0.0725335	76100	396532	76100	6.54489e+06	65070	0.0383062	65070	0.0540152	97830	1.27583e+07	68387	9.1149	79230	3.75953e+06	61430	0.000357481	72876	0.235419	69043	20.4315	69043	10.3045	108680	2.28365e+07	58794	54.1196	99980
	52091	1.01995e+06	95600	838161	95600	726499	95600	3.60596e+06	65796	4.02281e+07	98740	2.42632e+06	98740	5.69266e+06	55309	19.2108	55309	0.0180014	74740	3.13088e+06	58205	0.0737167	76120	397784	76120	6.57489e+06	65100	0.0390396	65100	0.0549849	97860	1.28061e+07	68417	9.26691	79260	3.77881e+06	61450	0.00036405	72896	0.237576	69063	20.5467	69063	10.3704	108700	2.28838e+07	58814	54.5346	100000
	52111	1.02493e+06	95620	841228	95620	728987	95620	3.61905e+06	65816	4.05001e+07	98760	2.44041e+06	98760	5.71535e+06	55329	19.4709	55329	0.0183782	74760	3.14465e+06	58225	0.0749181	76140	399038	76140	6.605e+06	65130	0.0397862	65130	0.055971	97890	1.28541e+07	68447	9.4213	79290	3.79817e+06	61470	0.000370734	72916	0.239753	69083	20.6624	69083	10.4366	108720	2.29311e+07	58834	54.9525	100020
	52131	1.02993e+06	95640	844305	95640	731482	95640	3.63218e+06	65836	4.07737e+07	98780	2.45458e+06	98780	5.73812e+06	55349	19.7343	55349	0.0187624	74780	3.15848e+06	58245	0.0761379	76160	400297	76160	6.63524e+06	65160	0.0405462	65160	0.0569737	97920	1.29022e+07	68477	9.57809	79320	3.81763e+06	61490	0.000377534	72936	0.241948	69103	20.7788	69103	10.5033	108740	2.29786e+07	58854	55.3733	100040
	52151	1.03494e+06	95660	847391	95660	733985	95660	3.64536e+06	65856	4.10489e+07	98800	2.46882e+06	98800	5.76096e+06	55369	20.001	55369	0.0191542	74800	3.17236e+06	58265	0.0773763	76180	401558	76180	6.6656e+06	65190	0.04132	65190	0.0579933	97950	1.29505e+07	68507	9.73733	79350	3.83716e+06	61510	0.000384452	72956	0.244161	69123	20.8957	69123	10.5703	108760	2.30261e+07	58874	55.7971	100060
	52171	1.03998e+06	95680	850488	95680	736495	95680	3.65857e+06	65876	4.13259e+07	98820	2.48314e+06	98820	5.7839e+06	55389	20.271	55389	0.0195536	74820	3.18629e+06	58285	0.0786338	76200	402823	76200	6.69608e+06	65220	0.0421076	65220	0.0590301	97980	1.29989e+07	68537	9.89904	79380	3.85679e+06	61530	0.000391491	72976	0.246394	69143	21.0132	69143	10.6377	108780	2.30737e+07	58894	56.2239	100080
	52191	1.04504e+06	95700	853595	95700	739013	95700	3.67183e+06	65896	4.16045e+07	98840	2.49754e+06	98840	5.80691e+06	55409	20.5444	55409	0.0199608	74840	3.20028e+06	58305	0.0799104	76220	404091	76220	6.72669e+06	65250	0.0429094	65250	0.0600843	98010	1.30476e+07	68567	10.0633	79410	3.8765e+06	61550	0.000398652	72996	0.248646	69163	21.1314	69163	10.7055	108800	2.31214e+07	58914	56.6537	100100
	52211	1.05012e+06	95720	856712	95720	741538	95720	3.68513e+06	65916	4.18849e+07	98860	2.51201e+06	98860	5.83001e+06	55429	20.8213	55429	0.0203759	74860	3.21432e+06	58325	0.0812066	76240	405363	76240	6.75742e+06	65280	0.0437256	65280	0.0611562	98040	1.30963e+07	68597	10.23	79440	3.8963e+06	61570	0.000405937	73016	0.250917	69183	21.2501	69183	10.7737	108820	2.31692e+07	58934	57.0865	100120
	52231	1.05522e+06	95740	859839	95740	744071	95740	3.69847e+06	65936	4.2167e+07	98880	2.52656e+06	98880	5.85318e+06	55449	21.1016	55449	0.0207992	74880	3.22841e+06	58345	0.0825226	76260	406638	76260	6.78828e+06	65310	0.0445564	65310	0.062246	98070	1.31452e+07	68627	10.3994	79470	3.91618e+06	61590	0.000413349	73036	0.253208	69203	21.3694	69203	10.8423	108840	2.32171e+07	58954	57.5223	100140
	52251	1.06034e+06	95760	862976	95760	746612	95760	3.71186e+06	65956	4.24508e+07	98900	2.54119e+06	98900	5.87644e+06	55469	21.3853	55469	0.0212307	74900	3.24256e+06	58365	0.0838586	76280	407917	76280	6.81926e+06	65340	0.0454021	65340	0.0633541	98100	1.31943e+07	68657	10.5714	79500	3.93616e+06	61610	0.000420889	73056	0.255518	69223	21.4894	69223	10.9113	108860	2.3265e+07	58974	57.9612	100160
	52271	1.06549e+06	95780	866123	95780	749160	95780	3.72529e+06	65976	4.27363e+07	98920	2.55589e+06	98920	5.89979e+06	55489	21.6727	55489	0.0216705	74920	3.25676e+06	58385	0.085215	76300	409199	76300	6.85037e+06	65370	0.0462629	65370	0.0644808	98130	1.32435e+07	68687	10.746	79530	3.95622e+06	61630	0.00042856	73076	0.257848	69243	21.6099	69243	10.9806	108880	2.33131e+07	58994	58.4031	100180
	52291	1.07065e+06	95800	869281	95800	751716	95800	3.73876e+06	65996	4.30236e+07	98940	2.57068e+06	98940	5.92322e+06	55509	21.9635	55509	0.0221189	74940	3.27102e+06	58405	0.086592	76320	410484	76320	6.88161e+06	65400	0.0471391	65400	0.0656263	98160	1.32929e+07	68717	10.9234	79560	3.97637e+06	61650	0.000436363	73096	0.260198	69263	21.7311	69263	11.0504	108900	2.33612e+07	59014	58.8482	100200
	52311	1.07584e+06	95820	872449	95820	754279	95820	3.75227e+06	66016	4.33126e+07	98960	2.58554e+06	98960	5.94673e+06	55529	22.2581	55529	0.022576	74960	3.28533e+06	58425	0.0879899	76340	411773	76340	6.91297e+06	65430	0.0480309	65430	0.0667909	98190	1.33425e+07	68747	11.1034	79590	3.99661e+06	61670	0.000444301	73116	0.262568	69283	21.8529	69283	11.1207	108920	2.34094e+07	59034	59.2963	100220
[truncated: 3,137 more rows]
[truncated: 1 more columns]
